# Supplementary material for: High-throughput production of a stable isotope-labeled peptide library for targeted proteomics using a wheat germ cell-free synthesis system
Source: Royal Society of Chemistry journal article supplement (doi:10.1039/c6mb00209a), 2016-05-11
Supplement: c6mb00209a2.xlsx [file c6mb00209a2.xlsx]

## Sheet: Table S1 
Table S1. Targeted HBFPs
HGNC Official Gene Symbol	Protein Name	HGNC ID	References
			Serum/Plasma a)	Potential Serum Biomarkers b)	Urine c)	Tear Fluid d)	Aqueous Humor e)
A1BG	alpha-1-B glycoprotein	HGNC:5	✓		✓		✓
A2M	alpha-2-macroglobulin	HGNC:7	✓		✓	✓	✓
ABHD14B	abhydrolase domain containing 14B	HGNC:28235	✓		✓	✓
ABI3BP	ABI family, member 3 (NESH) binding protein	HGNC:17265	✓		✓		✓
ACE	angiotensin I converting enzyme	HGNC:2707	✓		✓
ACPP	acid phosphatase, prostate	HGNC:125	✓		✓	✓
ACTN1	actinin, alpha 1	HGNC:163	✓			✓
ACTN4	actinin, alpha 4	HGNC:166	✓		✓	✓
ACTR1A	ARP1 actin-related protein 1 homolog A, centractin alpha (yeast)	HGNC:167	✓			✓
ACTR2	ARP2 actin-related protein 2 homolog (yeast)	HGNC:169	✓		✓	✓
ACTR3	ARP3 actin-related protein 3 homolog (yeast)	HGNC:170	✓		✓	✓
ACY3	aspartoacylase (aminocyclase) 3	HGNC:24104			✓
ADAM10	ADAM metallopeptidase domain 10	HGNC:188	✓
ADAM17	ADAM metallopeptidase domain 17	HGNC:195	✓
ADAMDEC1	ADAM-like, decysin 1	HGNC:16299	✓
ADH1A	alcohol dehydrogenase 1A (class I), alpha polypeptide	HGNC:249	✓			✓
ADH1C	alcohol dehydrogenase 1C (class I), gamma polypeptide	HGNC:251	✓			✓
ADIPOQ	adiponectin, C1Q and collagen domain containing	HGNC:13633	✓
ADK	adenosine kinase	HGNC:257	✓			✓
ADSS	adenylosuccinate synthase	HGNC:292	✓			✓
AFM	afamin	HGNC:316	✓		✓		✓
AGL	amylo-alpha-1, 6-glucosidase, 4-alpha-glucanotransferase	HGNC:321	✓			✓
AGRN	agrin	HGNC:329	✓		✓		✓
AGT	angiotensinogen (serpin peptidase inhibitor, clade A, member 8)	HGNC:333	✓		✓	✓	✓
AHCY	adenosylhomocysteinase	HGNC:343	✓		✓	✓
AHSG	alpha-2-HS-glycoprotein	HGNC:349	✓		✓	✓	✓
AHSP	alpha hemoglobin stabilizing protein	HGNC:18075	✓
AKR1A1	aldo-keto reductase family 1, member A1 (aldehyde reductase)	HGNC:380	✓		✓	✓
AKR1B1	aldo-keto reductase family 1, member B1 (aldose reductase)	HGNC:381	✓		✓		✓
AKR1C1	aldo-keto reductase family 1, member C1	HGNC:384	✓			✓
AKR1C2	aldo-keto reductase family 1, member C2	HGNC:385				✓
AKR7A2	aldo-keto reductase family 7, member A2 (aflatoxin aldehyde reductase)	HGNC:389	✓		✓	✓
ALAD	aminolevulinate dehydratase	HGNC:395	✓		✓	✓	✓
ALB	albumin	HGNC:399	✓		✓	✓	✓
ALCAM	activated leukocyte cell adhesion molecule	HGNC:400	✓
ALDH1A1	aldehyde dehydrogenase 1 family, member A1	HGNC:402	✓		✓	✓	✓
ALDH1A3	aldehyde dehydrogenase 1 family, member A3	HGNC:409	✓			✓
ALDH1L1	aldehyde dehydrogenase 1 family, member L1	HGNC:3978	✓		✓	✓
ALDH3A1	aldehyde dehydrogenase 3 family, member A1	HGNC:405	✓			✓	✓
ALDH9A1	aldehyde dehydrogenase 9 family, member A1	HGNC:412	✓		✓	✓
ALDOA	aldolase A, fructose-bisphosphate	HGNC:414	✓		✓	✓	✓
ALDOB	aldolase B, fructose-bisphosphate	HGNC:417	✓		✓
ALDOC	aldolase C, fructose-bisphosphate	HGNC:418	✓
ALKBH8	alkB, alkylation repair homolog 8 (E. coli)	HGNC:25189		✓
AMY1A	amylase, alpha 1A (salivary)	HGNC:474			✓		✓
AMY2B	amylase, alpha 2B (pancreatic)	HGNC:478	✓
ANG	angiogenin, ribonuclease, RNase A family, 5	HGNC:483	✓		✓	✓	✓
ANGPTL1	angiopoietin-like 1	HGNC:489	✓			✓
ANGPTL2	angiopoietin-like 2	HGNC:490	✓		✓
ANGPTL4	angiopoietin-like 4	HGNC:16039	✓
ANGPTL7	angiopoietin-like 7	HGNC:24078		✓			✓
ANKHD1	ankyrin repeat and KH domain containing 1	HGNC:24714		✓
ANO6	anoctamin 6	HGNC:25240		✓
ANPEP	alanyl (membrane) aminopeptidase	HGNC:500	✓		✓	✓
ANTXR1	anthrax toxin receptor 1	HGNC:21014	✓		✓
ANXA1	annexin A1	HGNC:533	✓		✓	✓	✓
ANXA11	annexin A11	HGNC:535	✓		✓	✓
ANXA2	annexin A2	HGNC:537	✓			✓
ANXA3	annexin A3	HGNC:541	✓		✓	✓
ANXA4	annexin A4	HGNC:542	✓		✓	✓
ANXA5	annexin A5	HGNC:543	✓		✓	✓	✓
ANXA7	annexin A7	HGNC:545	✓		✓	✓
ANXA8	annexin A8	HGNC:546	✓			✓
AOC1	amine oxidase, copper containing 1	HGNC:80		✓	✓
AOC3	amine oxidase, copper containing 3	HGNC:550	✓
AP1B1	adaptor-related protein complex 1, beta 1 subunit	HGNC:554	✓			✓
AP1M2	adaptor-related protein complex 1, mu 2 subunit	HGNC:558	✓			✓
AP2A1	adaptor-related protein complex 2, alpha 1 subunit	HGNC:561	✓			✓
APCS	amyloid P component, serum	HGNC:584	✓		✓	✓	✓
APLP1	amyloid beta (A4) precursor-like protein 1	HGNC:597	✓				✓
APMAP	adipocyte plasma membrane associated protein	HGNC:13238	✓
APOA1	apolipoprotein A-I	HGNC:600	✓		✓	✓	✓
APOA2	apolipoprotein A-II	HGNC:601	✓		✓	✓	✓
APOA4	apolipoprotein A-IV	HGNC:602	✓		✓	✓	✓
APOB	apolipoprotein B	HGNC:603	✓			✓	✓
APOBEC3B	apolipoprotein B mRNA editing enzyme, catalytic polypeptide-like 3B	HGNC:17352				✓
APOC1	apolipoprotein C-I	HGNC:607	✓
APOC2	apolipoprotein C-II	HGNC:609	✓
APOC3	apolipoprotein C-III	HGNC:610	✓
APOC4	apolipoprotein C-IV	HGNC:611	✓
APOD	apolipoprotein D	HGNC:612	✓		✓		✓
APOF	apolipoprotein F	HGNC:615	✓
APOH	apolipoprotein H (beta-2-glycoprotein I)	HGNC:616	✓		✓	✓	✓
APOL1	apolipoprotein L, 1	HGNC:618	✓
APOM	apolipoprotein M	HGNC:13916	✓		✓
APP	amyloid beta (A4) precursor protein	HGNC:620	✓		✓		✓
APRT	adenine phosphoribosyltransferase	HGNC:626	✓		✓	✓
AQP2	aquaporin 2 (collecting duct)	HGNC:634			✓
ARF1	ADP-ribosylation factor 1	HGNC:652			✓	✓
ARHGAP1	Rho GTPase activating protein 1	HGNC:673	✓			✓
ARHGDIA	Rho GDP dissociation inhibitor (GDI) alpha	HGNC:678	✓		✓
ARHGDIB	Rho GDP dissociation inhibitor (GDI) beta	HGNC:679	✓		✓	✓
ARPC1B	actin related protein 2/3 complex, subunit 1B, 41kDa	HGNC:704	✓			✓
ARPC2	actin related protein 2/3 complex, subunit 2, 34kDa	HGNC:705	✓			✓
ARPC4	actin related protein 2/3 complex, subunit 4, 20kDa	HGNC:707	✓		✓	✓
ARSA	arylsulfatase A	HGNC:713	✓		✓
ASAH1	N-acylsphingosine amidohydrolase (acid ceramidase) 1	HGNC:735	✓		✓	✓	✓
ASPH	aspartate beta-hydroxylase	HGNC:757	✓
ASS1	argininosuccinate synthase 1	HGNC:758	✓		✓	✓
ATIC	5-aminoimidazole-4-carboxamide ribonucleotide formyltransferase/IMP cyclohydrolase	HGNC:794	✓			✓
ATP1A1	ATPase, Na+/K+ transporting, alpha 1 polypeptide	HGNC:799	✓		✓
ATP1B1	ATPase, Na+/K+ transporting, beta 1 polypeptide	HGNC:804			✓
ATP1B3	ATPase, Na+/K+ transporting, beta 3 polypeptide	HGNC:806		✓
ATP5B	ATP synthase, H+ transporting, mitochondrial F1 complex, beta polypeptide	HGNC:830	✓			✓	✓
ATP6V1C1	ATPase, H+ transporting, lysosomal 42kDa, V1 subunit C1	HGNC:856	✓			✓
ATRN	attractin	HGNC:885	✓		✓	✓	✓
AXDND1	axonemal dynein light chain domain containing 1	HGNC:26564	✓
AXL	AXL receptor tyrosine kinase	HGNC:905	✓		✓
AZGP1	alpha-2-glycoprotein 1, zinc-binding	HGNC:910	✓			✓
AZU1	azurocidin 1	HGNC:913	✓		✓	✓
B2M	beta-2-microglobulin	HGNC:914	✓		✓	✓	✓
B3GNT1	UDP-GlcNAc:betaGal beta-1,3-N-acetylglucosaminyltransferase 1	HGNC:15685	✓
B4GALT1	UDP-Gal:betaGlcNAc beta 1,4- galactosyltransferase, polypeptide 1	HGNC:924	✓		✓	✓	✓
BCAM	basal cell adhesion molecule (Lutheran blood group)	HGNC:6722	✓		✓
BCHE	butyrylcholinesterase	HGNC:983	✓
BEND2	BEN domain containing 2	HGNC:28509		✓
BHMT	betaine--homocysteine S-methyltransferase	HGNC:1047	✓		✓
BLVRB	biliverdin reductase B (flavin reductase (NADPH))	HGNC:1063	✓		✓	✓
BPI	bactericidal/permeability-increasing protein	HGNC:1095	✓		✓	✓
BPIFB2	BPI fold containing family B, member 2	HGNC:16177	✓		✓
BSG	basigin (Ok blood group)	HGNC:1116	✓		✓
BST2	bone marrow stromal cell antigen 2	HGNC:1119	✓
BTD	biotinidase	HGNC:1122	✓		✓		✓
BTN3A3	butyrophilin, subfamily 3, member A3	HGNC:1140	✓
C12orf65	chromosome 12 open reading frame 65	HGNC:26784		✓
C14orf39	chromosome 14 open reading frame 39	HGNC:19849	✓
C1orf159	chromosome 1 open reading frame 159	HGNC:26062		✓
C1QA	complement component 1, q subcomponent, A chain	HGNC:1241	✓				✓
C1QB	complement component 1, q subcomponent, B chain	HGNC:1242	✓				✓
C1QC	complement component 1, q subcomponent, C chain	HGNC:1245	✓				✓
C1QTNF3	C1q and tumor necrosis factor related protein 3	HGNC:14326	✓				✓
C1R	complement component 1, r subcomponent	HGNC:1246	✓		✓		✓
C1RL	complement component 1, r subcomponent-like	HGNC:21265	✓
C1S	complement component 1, s subcomponent	HGNC:1247	✓		✓		✓
C2	complement component 2	HGNC:1248	✓				✓
C4A	complement component 4A (Rodgers blood group)	HGNC:1323	✓		✓	✓	✓
C4B	complement component 4B (Chido blood group)	HGNC:1324	✓				✓
C4BPA	complement component 4 binding protein, alpha	HGNC:1325	✓
C4BPB	complement component 4 binding protein, beta	HGNC:1328	✓
C5	complement component 5	HGNC:1331	✓		✓		✓
C6	complement component 6	HGNC:1339	✓		✓		✓
C7	complement component 7	HGNC:1346	✓		✓		✓
C8A	complement component 8, alpha polypeptide	HGNC:1352	✓				✓
C8B	complement component 8, beta polypeptide	HGNC:1353	✓				✓
C8G	complement component 8, gamma polypeptide	HGNC:1354	✓		✓		✓
C9	complement component 9	HGNC:1358	✓		✓		✓
CA1	carbonic anhydrase I	HGNC:1368	✓		✓		✓
CA12	carbonic anhydrase XII	HGNC:1371	✓
CA14	carbonic anhydrase XIV	HGNC:1372			✓
CA2	carbonic anhydrase II	HGNC:1373	✓		✓	✓	✓
CA3	carbonic anhydrase III, muscle specific	HGNC:1374	✓				✓
CACNA2D1	calcium channel, voltage-dependent, alpha 2/delta subunit 1	HGNC:1399	✓		✓
CADM1	cell adhesion molecule 1	HGNC:5951	✓		✓
CADM4	cell adhesion molecule 4	HGNC:30825	✓		✓
CALB1	calbindin 1, 28kDa	HGNC:1434	✓		✓
CALM3	calmodulin 3 (phosphorylase kinase, delta)	HGNC:1449	✓		✓
CALR	calreticulin	HGNC:1455	✓		✓	✓	✓
CALU	calumenin	HGNC:1458	✓			✓
CAMP	cathelicidin antimicrobial peptide	HGNC:1472	✓		✓
CAND1	cullin-associated and neddylation-dissociated 1	HGNC:30688	✓			✓
CANT1	calcium activated nucleotidase 1	HGNC:19721			✓	✓	✓
CAP1	CAP, adenylate cyclase-associated protein 1 (yeast)	HGNC:20040	✓		✓	✓
CAPG	capping protein (actin filament), gelsolin-like	HGNC:1474	✓		✓	✓
CAPN1	calpain 1, (mu/I) large subunit	HGNC:1476	✓		✓	✓
CAPN2	calpain 2, (m/II) large subunit	HGNC:1479	✓			✓
CAPNS1	calpain, small subunit 1	HGNC:1481	✓		✓	✓
CAPS	calcyphosine	HGNC:1487	✓		✓	✓
CAPZA1	capping protein (actin filament) muscle Z-line, alpha 1	HGNC:1488	✓			✓
CAPZA2	capping protein (actin filament) muscle Z-line, alpha 2	HGNC:1490	✓		✓	✓
CAPZB	capping protein (actin filament) muscle Z-line, beta	HGNC:1491	✓		✓	✓
CASC4	cancer susceptibility candidate 4	HGNC:24892	✓
CASP14	caspase 14, apoptosis-related cysteine peptidase	HGNC:1502	✓		✓		✓
CAT	catalase	HGNC:1516	✓			✓	✓
CBR1	carbonyl reductase 1	HGNC:1548	✓		✓	✓
CCDC37	coiled-coil domain containing 37	HGNC:26842		✓
CCL14	chemokine (C-C motif) ligand 14	HGNC:10612	✓
CCL16	chemokine (C-C motif) ligand 16	HGNC:10614	✓
CCT5	chaperonin containing TCP1, subunit 5 (epsilon)	HGNC:1618	✓			✓
CD109	CD109 molecule	HGNC:21685	✓
CD14	CD14 molecule	HGNC:1628	✓		✓	✓	✓
CD151	CD151 molecule (Raph blood group)	HGNC:1630		✓
CD163	CD163 molecule	HGNC:1631	✓		✓
CD1B	CD1b molecule	HGNC:1635	✓
CD1C	CD1c molecule	HGNC:1636		✓
CD1D	CD1d molecule	HGNC:1637		✓
CD2	CD2 molecule	HGNC:1639	✓
CD22	CD22 molecule	HGNC:1643	✓
CD226	CD226 molecule	HGNC:16961	✓
CD248	CD248 molecule, endosialin	HGNC:18219	✓		✓
CD276	CD276 molecule	HGNC:19137	✓		✓
CD28	CD28 molecule	HGNC:1653		✓
CD33	CD33 molecule	HGNC:1659	✓		✓
CD37	CD37 molecule	HGNC:1666	✓
CD38	CD38 molecule	HGNC:1667		✓
CD40	CD40 molecule, TNF receptor superfamily member 5	HGNC:11919	✓
CD40LG	CD40 ligand	HGNC:11935		✓
CD44	CD44 molecule (Indian blood group)	HGNC:1681	✓		✓		✓
CD46	CD46 molecule, complement regulatory protein	HGNC:6953	✓
CD47	CD47 molecule	HGNC:1682	✓
CD48	CD48 molecule	HGNC:1683	✓
CD53	CD53 molecule	HGNC:1686	✓
CD55	CD55 molecule, decay accelerating factor for complement (Cromer blood group)	HGNC:2665	✓		✓
CD58	CD58 molecule	HGNC:1688			✓
CD59	CD59 molecule, complement regulatory protein	HGNC:1689	✓		✓		✓
CD5L	CD5 molecule-like	HGNC:1690	✓		✓
CD68	CD68 molecule	HGNC:1693	✓
CD7	CD7 molecule	HGNC:1695		✓	✓
CD74	CD74 molecule, major histocompatibility complex, class II invariant chain	HGNC:1697	✓
CD79A	CD79a molecule, immunoglobulin-associated alpha	HGNC:1698	✓
CD79B	CD79b molecule, immunoglobulin-associated beta	HGNC:1699	✓
CD82	CD82 molecule	HGNC:6210	✓
CD9	CD9 molecule	HGNC:1709	✓		✓
CD97	CD97 molecule	HGNC:1711	✓
CDC37	cell division cycle 37	HGNC:1735	✓			✓
CDC42	cell division cycle 42	HGNC:1736	✓		✓	✓
CDCP1	CUB domain containing protein 1	HGNC:24357		✓
CDH1	cadherin 1, type 1, E-cadherin (epithelial)	HGNC:1748	✓		✓
CDH11	cadherin 11, type 2, OB-cadherin (osteoblast)	HGNC:1750	✓		✓
CDH13	cadherin 13	HGNC:1753	✓		✓
CDH16	cadherin 16, KSP-cadherin	HGNC:1755	✓		✓
CDH5	cadherin 5, type 2 (vascular endothelium)	HGNC:1764	✓
CDH6	cadherin 6, type 2, K-cadherin (fetal kidney)	HGNC:1765	✓		✓		✓
CDHR2	cadherin-related family member 2	HGNC:18231	✓		✓
CDHR5	cadherin-related family member 5	HGNC:7521	✓		✓
CEACAM1	carcinoembryonic antigen-related cell adhesion molecule 1 (biliary glycoprotein)	HGNC:1814	✓		✓	✓
CEL	carboxyl ester lipase	HGNC:1848	✓		✓
CELSR2	cadherin, EGF LAG seven-pass G-type receptor 2	HGNC:3231	✓
CES1	carboxylesterase 1	HGNC:1863	✓
CFB	complement factor B	HGNC:1037	✓		✓	✓	✓
CFD	complement factor D (adipsin)	HGNC:2771	✓		✓		✓
CFH	complement factor H	HGNC:4883	✓		✓	✓	✓
CFHR1	complement factor H-related 1	HGNC:4888	✓
CFHR2	complement factor H-related 2	HGNC:4890	✓				✓
CFHR4	complement factor H-related 4	HGNC:16979	✓
CFI	complement factor I	HGNC:5394	✓		✓		✓
CFL1	cofilin 1 (non-muscle)	HGNC:1874	✓		✓	✓
CFP	complement factor properdin	HGNC:8864	✓
CHGA	chromogranin A (parathyroid secretory protein 1)	HGNC:1929	✓		✓
CHGB	chromogranin B (secretogranin 1)	HGNC:1930	✓				✓
CHI3L1	chitinase 3-like 1 (cartilage glycoprotein-39)	HGNC:1932	✓		✓		✓
CHI3L2	chitinase 3-like 2	HGNC:1933	✓			✓
CHID1	chitinase domain containing 1	HGNC:28474				✓
CHL1	cell adhesion molecule L1-like	HGNC:1939	✓		✓		✓
CHMP1B	charged multivesicular body protein 1B	HGNC:24287			✓
CILP2	cartilage intermediate layer protein 2	HGNC:24213			✓
CKM	creatine kinase, muscle	HGNC:1994	✓
CLDND1	claudin domain containing 1	HGNC:1322		✓
CLEC14A	C-type lectin domain family 14, member A	HGNC:19832	✓		✓
CLEC3B	C-type lectin domain family 3, member B	HGNC:11891	✓		✓		✓
CLEC7A	C-type lectin domain family 7, member A	HGNC:14558			✓
CLIC1	chloride intracellular channel 1	HGNC:2062	✓		✓	✓
CLMP	CXADR-like membrane protein	HGNC:24039	✓		✓
CLN5	ceroid-lipofuscinosis, neuronal 5	HGNC:2076	✓		✓		✓
CLPTM1	cleft lip and palate associated transmembrane protein 1	HGNC:2087		✓
CLSTN1	calsyntenin 1	HGNC:17447	✓		✓		✓
CLSTN2	calsyntenin 2	HGNC:17448	✓				✓
CLSTN3	calsyntenin 3	HGNC:18371	✓		✓		✓
CLTC	clathrin, heavy chain (Hc)	HGNC:2092	✓			✓
CMPK1	cytidine monophosphate (UMP-CMP) kinase 1, cytosolic	HGNC:18170	✓		✓	✓
CNDP1	carnosine dipeptidase 1 (metallopeptidase M20 family)	HGNC:20675	✓				✓
CNDP2	CNDP dipeptidase 2 (metallopeptidase M20 family)	HGNC:24437	✓		✓	✓
CNN3	calponin 3, acidic	HGNC:2157	✓
CNOT2	CCR4-NOT transcription complex, subunit 2	HGNC:7878	✓
CNPY3	canopy FGF signaling regulator 3	HGNC:11968	✓
CNR1	cannabinoid receptor 1 (brain)	HGNC:2159	✓
CNTFR	ciliary neurotrophic factor receptor	HGNC:2170	✓		✓
CNTN1	contactin 1	HGNC:2171	✓		✓	✓	✓
CNTN2	contactin 2 (axonal)	HGNC:2172	✓				✓
COCH	cochlin	HGNC:2180	✓		✓
COL12A1	collagen, type XII, alpha 1	HGNC:2188	✓		✓
COL14A1	collagen, type XIV, alpha 1	HGNC:2191	✓		✓
COL15A1	collagen, type XV, alpha 1	HGNC:2192	✓		✓
COL18A1	collagen, type XVIII, alpha 1	HGNC:2195	✓		✓
COL1A1	collagen, type I, alpha 1	HGNC:2197	✓
COL4A1	collagen, type IV, alpha 1	HGNC:2202	✓		✓
COL5A1	collagen, type V, alpha 1	HGNC:2209	✓
COL6A1	collagen, type VI, alpha 1	HGNC:2211	✓		✓	✓	✓
COL6A2	collagen, type VI, alpha 2	HGNC:2212	✓		✓
COL6A3	collagen, type VI, alpha 3	HGNC:2213	✓		✓
COL9A2	collagen, type IX, alpha 2	HGNC:2218	✓				✓
COMP	cartilage oligomeric matrix protein	HGNC:2227	✓		✓
COMT	catechol-O-methyltransferase	HGNC:2228	✓			✓
COPA	coatomer protein complex, subunit alpha	HGNC:2230	✓			✓
COPB1	coatomer protein complex, subunit beta 1	HGNC:2231	✓			✓
COPB2	coatomer protein complex, subunit beta 2 (beta prime)	HGNC:2232	✓		✓	✓
COPE	coatomer protein complex, subunit epsilon	HGNC:2234				✓
COPG1	coatomer protein complex, subunit gamma 1	HGNC:2236	✓			✓
CORO1A	coronin, actin binding protein, 1A	HGNC:2252	✓			✓
COTL1	coactosin-like F-actin binding protein 1	HGNC:18304	✓		✓
CP	ceruloplasmin (ferroxidase)	HGNC:2295	✓		✓	✓	✓
CPB2	carboxypeptidase B2 (plasma)	HGNC:2300	✓				✓
CPE	carboxypeptidase E	HGNC:2303	✓		✓		✓
CPM	carboxypeptidase M	HGNC:2311	✓		✓
CPN1	carboxypeptidase N, polypeptide 1	HGNC:2312	✓
CPN2	carboxypeptidase N, polypeptide 2	HGNC:2313	✓		✓
CPNE3	copine III	HGNC:2316	✓		✓
CPQ	carboxypeptidase Q	HGNC:16910	✓
CPVL	carboxypeptidase, vitellogenic-like	HGNC:14399	✓		✓
CPZ	carboxypeptidase Z	HGNC:2333			✓
CR2	complement component (3d/Epstein Barr virus) receptor 2	HGNC:2336	✓
CRAT	carnitine O-acetyltransferase	HGNC:2342	✓
CREG1	cellular repressor of E1A-stimulated genes 1	HGNC:2351	✓		✓
CRISP3	cysteine-rich secretory protein 3	HGNC:16904	✓		✓
CRP	C-reactive protein, pentraxin-related	HGNC:2367	✓				✓
CRTAC1	cartilage acidic protein 1	HGNC:14882	✓				✓
CRYBB1	crystallin, beta B1	HGNC:2397	✓				✓
CRYBB2	crystallin, beta B2	HGNC:2398	✓				✓
CRYL1	crystallin, lambda 1	HGNC:18246	✓		✓
CSF1R	colony stimulating factor 1 receptor	HGNC:2433	✓		✓		✓
CSPG4	chondroitin sulfate proteoglycan 4	HGNC:2466		✓	✓
CST1	cystatin SN	HGNC:2473	✓			✓
CST2	cystatin SA	HGNC:2474			✓	✓
CST3	cystatin C	HGNC:2475	✓		✓	✓	✓
CST4	cystatin S	HGNC:2476	✓		✓	✓	✓
CSTA	cystatin A (stefin A)	HGNC:2481	✓		✓		✓
CSTB	cystatin B (stefin B)	HGNC:2482	✓		✓	✓
CTGF	connective tissue growth factor	HGNC:2500	✓		✓		✓
CTHRC1	collagen triple helix repeat containing 1	HGNC:18831		✓
CTSA	cathepsin A	HGNC:9251	✓		✓
CTSC	cathepsin C	HGNC:2528	✓		✓
CTSD	cathepsin D	HGNC:2529	✓		✓	✓	✓
CTSG	cathepsin G	HGNC:2532	✓			✓
CTSH	cathepsin H	HGNC:2535	✓		✓
CTSL	cathepsin L	HGNC:2537		✓	✓		✓
CTSV	cathepsin V	HGNC:2538		✓
CTSZ	cathepsin Z	HGNC:2547	✓		✓	✓	✓
CUBN	cubilin (intrinsic factor-cobalamin receptor)	HGNC:2548			✓
CUTA	cutA divalent cation tolerance homolog (E. coli)	HGNC:21101	✓		✓	✓	✓
DAG1	dystroglycan 1 (dystrophin-associated glycoprotein 1)	HGNC:2666	✓		✓	✓	✓
DBH	dopamine beta-hydroxylase (dopamine beta-monooxygenase)	HGNC:2689	✓
DBI	diazepam binding inhibitor (GABA receptor modulator, acyl-CoA binding protein)	HGNC:2690	✓		✓	✓
DCD	dermcidin	HGNC:14669	✓		✓	✓	✓
DCN	decorin	HGNC:2705	✓				✓
DDAH2	dimethylarginine dimethylaminohydrolase 2	HGNC:2716	✓		✓
DDT	D-dopachrome tautomerase	HGNC:2732	✓		✓	✓
DDX39B	DEAD (Asp-Glu-Ala-Asp) box polypeptide 39B	HGNC:13917	✓			✓
DEFA3	defensin, alpha 3, neutrophil-specific	HGNC:2762		✓
DEFB1	defensin, beta 1	HGNC:2766	✓		✓
DERA	deoxyribose-phosphate aldolase (putative)	HGNC:24269	✓			✓
DIAPH1	diaphanous-related formin 1	HGNC:2876	✓			✓
DKK3	dickkopf WNT signaling pathway inhibitor 3	HGNC:2893	✓				✓
DLG3	discs, large homolog 3 (Drosophila)	HGNC:2902	✓
DLK1	delta-like 1 homolog (Drosophila)	HGNC:2907			✓
DMBT1	deleted in malignant brain tumors 1	HGNC:2926	✓			✓
DNAJC3	DnaJ (Hsp40) homolog, subfamily C, member 3	HGNC:9439				✓
DNASE1	deoxyribonuclease I	HGNC:2956	✓		✓
DNM1L	dynamin 1-like	HGNC:2973	✓
DNM2	dynamin 2	HGNC:2974	✓			✓
DNPEP	aspartyl aminopeptidase	HGNC:2981	✓			✓
DPEP1	dipeptidase 1 (renal)	HGNC:3002	✓		✓
DPM1	dolichyl-phosphate mannosyltransferase polypeptide 1, catalytic subunit	HGNC:3005	✓
DPP4	dipeptidyl-peptidase 4	HGNC:3009	✓		✓	✓
DPP7	dipeptidyl-peptidase 7	HGNC:14892	✓		✓		✓
DPT	dermatopontin	HGNC:3011	✓		✓		✓
DPYD	dihydropyrimidine dehydrogenase	HGNC:3012	✓			✓
DSC1	desmocollin 1	HGNC:3035	✓				✓
DSC2	desmocollin 2	HGNC:3036	✓		✓	✓	✓
DSC3	desmocollin 3	HGNC:3037	✓		✓	✓	✓
DSG1	desmoglein 1	HGNC:3048	✓		✓
DSG2	desmoglein 2	HGNC:3049	✓		✓		✓
DSP	desmoplakin	HGNC:3052	✓		✓	✓	✓
DYNC1H1	dynein, cytoplasmic 1, heavy chain 1	HGNC:2961	✓			✓
ECE1	endothelin converting enzyme 1	HGNC:3146	✓
ECHDC1	enoyl CoA hydratase domain containing 1	HGNC:21489	✓			✓
ECM1	extracellular matrix protein 1	HGNC:3153	✓				✓
EDEM3	ER degradation enhancer, mannosidase alpha-like 3	HGNC:16787	✓
EEF1A1	eukaryotic translation elongation factor 1 alpha 1	HGNC:3189	✓		✓	✓	✓
EEF1D	eukaryotic translation elongation factor 1 delta (guanine nucleotide exchange protein)	HGNC:3211	✓			✓
EEF1G	eukaryotic translation elongation factor 1 gamma	HGNC:3213	✓			✓
EEF2	eukaryotic translation elongation factor 2	HGNC:3214	✓			✓	✓
EFEMP1	EGF containing fibulin-like extracellular matrix protein 1	HGNC:3218	✓		✓		✓
EFNA1	ephrin-A1	HGNC:3221	✓		✓
EFNA5	ephrin-A5	HGNC:3225		✓
EFNB1	ephrin-B1	HGNC:3226	✓		✓
EFNB2	ephrin-B2	HGNC:3227	✓
EGFR	epidermal growth factor receptor	HGNC:3236	✓
EIF3B	eukaryotic translation initiation factor 3, subunit B	HGNC:3280	✓			✓
EIF4A1	eukaryotic translation initiation factor 4A1	HGNC:3282	✓			✓
EIF4H	eukaryotic translation initiation factor 4H	HGNC:12741	✓			✓
ELANE	elastase, neutrophil expressed	HGNC:3309	✓		✓	✓
EMC1	ER membrane protein complex subunit 1	HGNC:28957		✓
EMILIN1	elastin microfibril interfacer 1	HGNC:19880	✓
EML2	echinoderm microtubule associated protein like 2	HGNC:18035	✓			✓
ENDOD1	endonuclease domain containing 1	HGNC:29129	✓		✓
ENO1	enolase 1, (alpha)	HGNC:3350	✓		✓	✓	✓
ENO2	enolase 2 (gamma, neuronal)	HGNC:3353	✓				✓
ENO3	enolase 3 (beta, muscle)	HGNC:3354	✓
ENPEP	glutamyl aminopeptidase (aminopeptidase A)	HGNC:3355	✓		✓
ENPP2	ectonucleotide pyrophosphatase/phosphodiesterase 2	HGNC:3357	✓		✓		✓
ENTPD2	ectonucleoside triphosphate diphosphohydrolase 2	HGNC:3364	✓
EPCAM	epithelial cell adhesion molecule	HGNC:11529	✓
EPDR1	ependymin related 1	HGNC:17572	✓		✓		✓
EPHA1	EPH receptor A1	HGNC:3385	✓		✓
EPHA10	EPH receptor A10	HGNC:19987	✓
EPHA3	EPH receptor A3	HGNC:3387	✓
EPHB2	EPH receptor B2	HGNC:3393	✓		✓
EPHB3	EPH receptor B3	HGNC:3394	✓		✓
EPHB4	EPH receptor B4	HGNC:3395	✓		✓
EPHB6	EPH receptor B6	HGNC:3396	✓		✓
EPPK1	epiplakin 1	HGNC:15577	✓			✓
EPRS	glutamyl-prolyl-tRNA synthetase	HGNC:3418	✓			✓
EPS8	epidermal growth factor receptor pathway substrate 8	HGNC:3420	✓		✓
ERAP1	endoplasmic reticulum aminopeptidase 1	HGNC:18173	✓		✓	✓	✓
ERMP1	endoplasmic reticulum metallopeptidase 1	HGNC:23703		✓
ESAM	endothelial cell adhesion molecule	HGNC:17474	✓		✓
EZR	ezrin	HGNC:12691	✓		✓	✓
F10	coagulation factor X	HGNC:3528	✓				✓
F11	coagulation factor XI	HGNC:3529	✓
F11R	F11 receptor	HGNC:14685	✓		✓
F12	coagulation factor XII (Hageman factor)	HGNC:3530	✓		✓		✓
F13A1	coagulation factor XIII, A1 polypeptide	HGNC:3531	✓
F13B	coagulation factor XIII, B polypeptide	HGNC:3534	✓
F2	coagulation factor II (thrombin)	HGNC:3535	✓		✓		✓
F3	coagulation factor III (thromboplastin, tissue factor)	HGNC:3541	✓			✓
F5	coagulation factor V (proaccelerin, labile factor)	HGNC:3542	✓			✓	✓
F9	coagulation factor IX	HGNC:3551	✓
FABP1	fatty acid binding protein 1, liver	HGNC:3555	✓		✓
FABP3	fatty acid binding protein 3, muscle and heart (mammary-derived growth inhibitor)	HGNC:3557	✓		✓
FABP4	fatty acid binding protein 4, adipocyte	HGNC:3559	✓
FABP5	fatty acid binding protein 5 (psoriasis-associated)	HGNC:3560	✓			✓
FAF2	Fas associated factor family member 2	HGNC:24666		✓
FAH	fumarylacetoacetate hydrolase (fumarylacetoacetase)	HGNC:3579	✓		✓
FAM174A	family with sequence similarity 174, member A	HGNC:24943		✓
FAM174B	family with sequence similarity 174, member B	HGNC:34339		✓
FAM3C	family with sequence similarity 3, member C	HGNC:18664	✓		✓		✓
FAM49B	family with sequence similarity 49, member B	HGNC:25216	✓			✓
FASN	fatty acid synthase	HGNC:3594	✓			✓
FASTKD5	FAST kinase domains 5	HGNC:25790	✓
FAT1	FAT atypical cadherin 1	HGNC:3595	✓
FBLN2	fibulin 2	HGNC:3601	✓		✓
FBLN5	fibulin 5	HGNC:3602	✓		✓
FBLN7	fibulin 7	HGNC:26740	✓		✓
FBN1	fibrillin 1	HGNC:3603	✓		✓		✓
FBP1	fructose-1,6-bisphosphatase 1	HGNC:3606	✓		✓	✓
FCGBP	Fc fragment of IgG binding protein	HGNC:13572	✓
FCGR3B	Fc fragment of IgG, low affinity IIIb, receptor (CD16b)	HGNC:3620	✓		✓
FCN3	ficolin (collagen/fibrinogen domain containing) 3	HGNC:3625	✓
FGA	fibrinogen alpha chain	HGNC:3661	✓		✓	✓	✓
FGB	fibrinogen beta chain	HGNC:3662	✓			✓	✓
FGG	fibrinogen gamma chain	HGNC:3694	✓		✓	✓	✓
FGL2	fibrinogen-like 2	HGNC:3696	✓		✓
FKBP10	FK506 binding protein 10, 65 kDa	HGNC:18169	✓
FLNA	filamin A, alpha	HGNC:3754	✓		✓	✓
FLNB	filamin B, beta	HGNC:3755	✓		✓	✓
FLNC	filamin C, gamma	HGNC:3756	✓		✓
FN1	fibronectin 1	HGNC:3778	✓		✓	✓	✓
FOLH1	folate hydrolase (prostate-specific membrane antigen) 1	HGNC:3788	✓
FOLR1	folate receptor 1 (adult)	HGNC:3791	✓		✓
FRAS1	Fraser extracellular matrix complex subunit 1	HGNC:19185	✓
FREM2	FRAS1 related extracellular matrix protein 2	HGNC:25396		✓	✓
FRZB	frizzled-related protein	HGNC:3959	✓				✓
FSTL1	follistatin-like 1	HGNC:3972	✓		✓		✓
FSTL5	follistatin-like 5	HGNC:21386		✓			✓
FTH1	ferritin, heavy polypeptide 1	HGNC:3976	✓			✓
FUCA1	fucosidase, alpha-L- 1, tissue	HGNC:4006	✓		✓	✓
FUT3	fucosyltransferase 3 (galactoside 3(4)-L-fucosyltransferase, Lewis blood group)	HGNC:4014	✓			✓
GAA	glucosidase, alpha; acid	HGNC:4065	✓		✓
GALNS	galactosamine (N-acetyl)-6-sulfatase	HGNC:4122	✓		✓
GALNT2	polypeptide N-acetylgalactosaminyltransferase 2	HGNC:4124	✓				✓
GALNT5	polypeptide N-acetylgalactosaminyltransferase 5	HGNC:4127	✓			✓
GANAB	glucosidase, alpha; neutral AB	HGNC:4138	✓			✓
GAPDH	glyceraldehyde-3-phosphate dehydrogenase	HGNC:4141	✓			✓
GART	phosphoribosylglycinamide formyltransferase, phosphoribosylglycinamide synthetase, phosphoribosylaminoimidazole synthetase	HGNC:4163	✓			✓
GAS6	growth arrest-specific 6	HGNC:4168	✓		✓		✓
GBA	glucosidase, beta, acid	HGNC:4177	✓		✓
GC	group-specific component (vitamin D binding protein)	HGNC:4187	✓		✓	✓	✓
GCNT3	glucosaminyl (N-acetyl) transferase 3, mucin type	HGNC:4205				✓
GDI2	GDP dissociation inhibitor 2	HGNC:4227	✓		✓	✓
GFRA1	GDNF family receptor alpha 1	HGNC:4243	✓
GGACT	gamma-glutamylamine cyclotransferase	HGNC:25100			✓
GGCT	gamma-glutamylcyclotransferase	HGNC:21705	✓		✓		✓
GGH	gamma-glutamyl hydrolase (conjugase, folylpolygammaglutamyl hydrolase)	HGNC:4248	✓		✓		✓
GGT1	gamma-glutamyltransferase 1	HGNC:4250	✓
GGT6	gamma-glutamyltransferase 6	HGNC:26891			✓	✓
GLA	galactosidase, alpha	HGNC:4296	✓		✓
GLB1	galactosidase, beta 1	HGNC:4298	✓		✓
GLG1	golgi glycoprotein 1	HGNC:4316			✓	✓
GLOD4	glyoxalase domain containing 4	HGNC:14111	✓		✓	✓
GLS2	glutaminase 2 (liver, mitochondrial)	HGNC:29570	✓
GLUD1	glutamate dehydrogenase 1	HGNC:4335	✓
GLUL	glutamate-ammonia ligase	HGNC:4341	✓		✓	✓
GMDS	GDP-mannose 4,6-dehydratase	HGNC:4369	✓			✓
GNAI2	guanine nucleotide binding protein (G protein), alpha inhibiting activity polypeptide 2	HGNC:4385	✓		✓	✓
GNAS	GNAS complex locus	HGNC:4392		✓	✓
GNB1	guanine nucleotide binding protein (G protein), beta polypeptide 1	HGNC:4396	✓		✓	✓
GNB2	guanine nucleotide binding protein (G protein), beta polypeptide 2	HGNC:4398	✓		✓	✓
GNB2L1	guanine nucleotide binding protein (G protein), beta polypeptide 2-like 1	HGNC:4399	✓			✓
GNG12	guanine nucleotide binding protein (G protein), gamma 12	HGNC:19663	✓		✓
GNPTG	N-acetylglucosamine-1-phosphate transferase, gamma subunit	HGNC:23026	✓			✓
GNS	glucosamine (N-acetyl)-6-sulfatase	HGNC:4422		✓	✓		✓
GOLM1	golgi membrane protein 1	HGNC:15451	✓		✓	✓
GOT1	glutamic-oxaloacetic transaminase 1, soluble	HGNC:4432	✓		✓	✓	✓
GP1BA	glycoprotein Ib (platelet), alpha polypeptide	HGNC:4439	✓		✓
GP5	glycoprotein V (platelet)	HGNC:4443	✓		✓
GP6	glycoprotein VI (platelet)	HGNC:14388	✓		✓
GPD1	glycerol-3-phosphate dehydrogenase 1 (soluble)	HGNC:4455	✓		✓
GPD1L	glycerol-3-phosphate dehydrogenase 1-like	HGNC:28956				✓
GPI	glucose-6-phosphate isomerase	HGNC:4458	✓		✓	✓	✓
GPLD1	glycosylphosphatidylinositol specific phospholipase D1	HGNC:4459	✓
GPNMB	glycoprotein (transmembrane) nmb	HGNC:4462	✓		✓
GPR107	G protein-coupled receptor 107	HGNC:17830		✓
GPR124	G protein-coupled receptor 124	HGNC:17849	✓
GPR180	G protein-coupled receptor 180	HGNC:28899			✓
GPR98	G protein-coupled receptor 98	HGNC:17416	✓
GPRC5C	G protein-coupled receptor, class C, group 5, member C	HGNC:13309			✓
GPX1	glutathione peroxidase 1	HGNC:4553	✓			✓
GPX3	glutathione peroxidase 3 (plasma)	HGNC:4555	✓		✓	✓	✓
GRHL1	grainyhead-like 1 (Drosophila)	HGNC:17923	✓
GRHPR	glyoxylate reductase/hydroxypyruvate reductase	HGNC:4570	✓		✓	✓
GRIA4	glutamate receptor, ionotropic, AMPA 4	HGNC:4574	✓				✓
GSN	gelsolin	HGNC:4620	✓		✓	✓	✓
GSR	glutathione reductase	HGNC:4623	✓		✓	✓	✓
GSS	glutathione synthetase	HGNC:4624	✓		✓	✓	✓
GSTA1	glutathione S-transferase alpha 1	HGNC:4626	✓			✓
GSTA2	glutathione S-transferase alpha 2	HGNC:4627			✓
GSTM3	glutathione S-transferase mu 3 (brain)	HGNC:4635	✓		✓
GSTO1	glutathione S-transferase omega 1	HGNC:13312	✓		✓		✓
GSTP1	glutathione S-transferase pi 1	HGNC:4638	✓		✓	✓	✓
GUCY2C	guanylate cyclase 2C (heat stable enterotoxin receptor)	HGNC:4688	✓
GUSB	glucuronidase, beta	HGNC:4696	✓		✓
HAAO	3-hydroxyanthranilate 3,4-dioxygenase	HGNC:4796	✓		✓
HABP2	hyaluronan binding protein 2	HGNC:4798	✓				✓
HAVCR2	hepatitis A virus cellular receptor 2	HGNC:18437	✓		✓
HBB	hemoglobin, beta	HGNC:4827	✓		✓		✓
HBD	hemoglobin, delta	HGNC:4829	✓				✓
HBG1	hemoglobin, gamma A	HGNC:4831	✓				✓
HEBP2	heme binding protein 2	HGNC:15716			✓	✓
HEXB	hexosaminidase B (beta polypeptide)	HGNC:4879	✓		✓		✓
HGFAC	HGF activator	HGNC:4894	✓		✓		✓
HIST1H4C	histone cluster 1, H4c	HGNC:4787	✓		✓
HLA-A	major histocompatibility complex, class I, A	HGNC:4931	✓		✓
HLA-C	major histocompatibility complex, class I, C	HGNC:4933	✓
HLA-DPA1	major histocompatibility complex, class II, DP alpha 1	HGNC:4938	✓
HLA-DRA	major histocompatibility complex, class II, DR alpha	HGNC:4947	✓
HMCN1	hemicentin 1	HGNC:19194	✓		✓
HNRNPA2B1	heterogeneous nuclear ribonucleoprotein A2/B1	HGNC:5033	✓			✓
HNRNPD	heterogeneous nuclear ribonucleoprotein D (AU-rich element RNA binding protein 1, 37kDa)	HGNC:5036	✓			✓
HNRNPF	heterogeneous nuclear ribonucleoprotein F	HGNC:5039	✓			✓
HNRNPK	heterogeneous nuclear ribonucleoprotein K	HGNC:5044	✓
HNRNPU	heterogeneous nuclear ribonucleoprotein U (scaffold attachment factor A)	HGNC:5048	✓
HP	haptoglobin	HGNC:5141	✓		✓	✓
HPD	4-hydroxyphenylpyruvate dioxygenase	HGNC:5147	✓		✓
HPRT1	hypoxanthine phosphoribosyltransferase 1	HGNC:5157	✓		✓	✓	✓
HPX	hemopexin	HGNC:5171	✓		✓	✓	✓
HRG	histidine-rich glycoprotein	HGNC:5181	✓		✓		✓
HRNR	hornerin	HGNC:20846	✓		✓	✓	✓
HRSP12	heat-responsive protein 12	HGNC:16897	✓		✓
HSP90AA1	heat shock protein 90kDa alpha (cytosolic), class A member 1	HGNC:5253	✓
HSP90AB1	heat shock protein 90kDa alpha (cytosolic), class B member 1	HGNC:5258	✓		✓
HSP90B1	heat shock protein 90kDa beta (Grp94), member 1	HGNC:12028	✓			✓
HSPA13	heat shock protein 70kDa family, member 13	HGNC:11375	✓				✓
HSPA1A	heat shock 70kDa protein 1A	HGNC:5232	✓		✓	✓	✓
HSPA1B	heat shock 70kDa protein 1B	HGNC:5233	✓			✓
HSPA4	heat shock 70kDa protein 4	HGNC:5237	✓		✓	✓
HSPA5	heat shock 70kDa protein 5 (glucose-regulated protein, 78kDa)	HGNC:5238	✓			✓
HSPA8	heat shock 70kDa protein 8	HGNC:5241	✓		✓	✓	✓
HSPB1	heat shock 27kDa protein 1	HGNC:5246	✓		✓	✓
HSPD1	heat shock 60kDa protein 1 (chaperonin)	HGNC:5261	✓
HSPG2	heparan sulfate proteoglycan 2	HGNC:5273	✓		✓	✓	✓
HTRA1	HtrA serine peptidase 1	HGNC:9476	✓			✓
HYAL1	hyaluronoglucosaminidase 1	HGNC:5320	✓		✓
HYOU1	hypoxia up-regulated 1	HGNC:16931	✓			✓
IARS	isoleucyl-tRNA synthetase	HGNC:5330	✓			✓
ICAM1	intercellular adhesion molecule 1	HGNC:5344	✓		✓
ICAM2	intercellular adhesion molecule 2	HGNC:5345	✓		✓
ICAM3	intercellular adhesion molecule 3	HGNC:5346	✓
ICOSLG	inducible T-cell co-stimulator ligand	HGNC:17087	✓		✓
IDH1	isocitrate dehydrogenase 1 (NADP+), soluble	HGNC:5382	✓		✓	✓
IDH3A	isocitrate dehydrogenase 3 (NAD+) alpha	HGNC:5384	✓
IFNAR1	interferon (alpha, beta and omega) receptor 1	HGNC:5432	✓
IFNAR2	interferon (alpha, beta and omega) receptor 2	HGNC:5433	✓
IGF1R	insulin-like growth factor 1 receptor	HGNC:5465	✓
IGF2R	insulin-like growth factor 2 receptor	HGNC:5467	✓		✓	✓
IGFALS	insulin-like growth factor binding protein, acid labile subunit	HGNC:5468	✓		✓		✓
IGFBP2	insulin-like growth factor binding protein 2, 36kDa	HGNC:5471	✓		✓		✓
IGFBP3	insulin-like growth factor binding protein 3	HGNC:5472	✓		✓
IGFBP4	insulin-like growth factor binding protein 4	HGNC:5473	✓				✓
IGFBP5	insulin-like growth factor binding protein 5	HGNC:5474	✓				✓
IGFBP6	insulin-like growth factor binding protein 6	HGNC:5475	✓		✓		✓
IGFBP7	insulin-like growth factor binding protein 7	HGNC:5476	✓		✓		✓
IGHA1	immunoglobulin heavy constant alpha 1	HGNC:5478		✓		✓
IGHG1	immunoglobulin heavy constant gamma 1 (G1m marker)	HGNC:5525	✓
IGHG2	immunoglobulin heavy constant gamma 2 (G2m marker)	HGNC:5526					✓
IGHG4	immunoglobulin heavy constant gamma 4 (G4m marker)	HGNC:5528	✓				✓
IGHG1	immunoglobulin heavy constant gamma 1 (G1m marker)	HGNC:5525	✓
IGJ	immunoglobulin J polypeptide, linker protein for immunoglobulin alpha and mu polypeptides	HGNC:5713	✓		✓	✓
IGKC	immunoglobulin kappa constant	HGNC:5716			✓		✓
IGLC2	immunoglobulin lambda constant 2 (Kern-Oz- marker)	HGNC:5856	✓
IGSF3	immunoglobulin superfamily, member 3	HGNC:5950		✓
IGSF8	immunoglobulin superfamily, member 8	HGNC:17813	✓		✓
IHH	indian hedgehog	HGNC:5956	✓
IL17RA	interleukin 17 receptor A	HGNC:5985	✓
IL1R2	interleukin 1 receptor, type II	HGNC:5994	✓
IL1RL1	interleukin 1 receptor-like 1	HGNC:5998	✓
IL1RN	interleukin 1 receptor antagonist	HGNC:6000	✓		✓	✓
IL4R	interleukin 4 receptor	HGNC:6015	✓		✓
IL6ST	interleukin 6 signal transducer	HGNC:6021	✓		✓		✓
IMPA1	inositol(myo)-1(or 4)-monophosphatase 1	HGNC:6050	✓			✓
IMPAD1	inositol monophosphatase domain containing 1	HGNC:26019		✓
INPP1	inositol polyphosphate-1-phosphatase	HGNC:6071	✓			✓
INPP5D	inositol polyphosphate-5-phosphatase, 145kDa	HGNC:6079	✓
INS-IGF2	INS-IGF2 readthrough	HGNC:33527		✓
INSR	insulin receptor	HGNC:6091	✓
IQCB1	IQ motif containing B1	HGNC:28949	✓
IQGAP1	IQ motif containing GTPase activating protein 1	HGNC:6110	✓			✓
ITFG1	integrin alpha FG-GAP repeat containing 1	HGNC:30697	✓		✓
ITFG3	integrin alpha FG-GAP repeat containing 3	HGNC:14163		✓
ITGA1	integrin, alpha 1	HGNC:6134	✓
ITGA2	integrin, alpha 2 (CD49B, alpha 2 subunit of VLA-2 receptor)	HGNC:6137	✓
ITGA3	integrin, alpha 3 (antigen CD49C, alpha 3 subunit of VLA-3 receptor)	HGNC:6139	✓
ITGA4	integrin, alpha 4 (antigen CD49D, alpha 4 subunit of VLA-4 receptor)	HGNC:6140	✓
ITGA5	integrin, alpha 5 (fibronectin receptor, alpha polypeptide)	HGNC:6141	✓
ITGA6	integrin, alpha 6	HGNC:6142	✓
ITGAL	integrin, alpha L (antigen CD11A (p180), lymphocyte function-associated antigen 1; alpha polypeptide)	HGNC:6148	✓
ITGAM	integrin, alpha M (complement component 3 receptor 3 subunit)	HGNC:6149	✓			✓
ITGAV	integrin, alpha V	HGNC:6150	✓
ITGB1	integrin, beta 1 (fibronectin receptor, beta polypeptide, antigen CD29 includes MDF2, MSK12)	HGNC:6153	✓
ITGB2	integrin, beta 2 (complement component 3 receptor 3 and 4 subunit)	HGNC:6155	✓
ITGB3	integrin, beta 3 (platelet glycoprotein IIIa, antigen CD61)	HGNC:6156	✓
ITGB5	integrin, beta 5	HGNC:6160	✓
ITIH1	inter-alpha-trypsin inhibitor heavy chain 1	HGNC:6166	✓		✓	✓	✓
ITIH2	inter-alpha-trypsin inhibitor heavy chain 2	HGNC:6167	✓		✓	✓	✓
ITIH3	inter-alpha-trypsin inhibitor heavy chain 3	HGNC:6168	✓				✓
ITIH4	inter-alpha-trypsin inhibitor heavy chain family, member 4	HGNC:6169	✓		✓	✓	✓
ITIH5	inter-alpha-trypsin inhibitor heavy chain family, member 5	HGNC:21449	✓
ITM2B	integral membrane protein 2B	HGNC:6174	✓		✓
JAG1	jagged 1	HGNC:6188	✓
JAM3	junctional adhesion molecule 3	HGNC:15532		✓
JUP	junction plakoglobin	HGNC:6207	✓				✓
KERA	keratocan	HGNC:6309	✓				✓
KIAA0319L	KIAA0319-like	HGNC:30071	✓
KIAA1244	KIAA1244	HGNC:21213	✓
KIAA1324	KIAA1324	HGNC:29618		✓
KIAA1468	KIAA1468	HGNC:29289	✓
KIF13A	kinesin family member 13A	HGNC:14566	✓
KIF13B	kinesin family member 13B	HGNC:14405	✓			✓
KIF20B	kinesin family member 20B	HGNC:7212	✓
KIF5B	kinesin family member 5B	HGNC:6324	✓			✓
KLK1	kallikrein 1	HGNC:6357	✓
KLK11	kallikrein-related peptidase 11	HGNC:6359	✓		✓		✓
KLK2	kallikrein-related peptidase 2	HGNC:6363	✓
KLK3	kallikrein-related peptidase 3	HGNC:6364	✓		✓
KLKB1	kallikrein B, plasma (Fletcher factor) 1	HGNC:6371	✓		✓		✓
KPNB1	karyopherin (importin) beta 1	HGNC:6400	✓			✓
KRT10	keratin 10	HGNC:6413	✓
KRT19	keratin 19	HGNC:6436	✓
KRT2	keratin 2	HGNC:6439	✓
KSR2	kinase suppressor of ras 2	HGNC:18610	✓
KTN1	kinectin 1 (kinesin receptor)	HGNC:6467	✓
KYNU	kynureninase	HGNC:6469	✓			✓
L1CAM	L1 cell adhesion molecule	HGNC:6470	✓		✓
LACRT	lacritin	HGNC:16430	✓			✓
LAG3	lymphocyte-activation gene 3	HGNC:6476		✓
LAIR1	leukocyte-associated immunoglobulin-like receptor 1	HGNC:6477	✓		✓
LAMA2	laminin, alpha 2	HGNC:6482	✓
LAMA3	laminin, alpha 3	HGNC:6483	✓
LAMA4	laminin, alpha 4	HGNC:6484	✓
LAMA5	laminin, alpha 5	HGNC:6485	✓		✓
LAMB1	laminin, beta 1	HGNC:6486	✓
LAMB2	laminin, beta 2 (laminin S)	HGNC:6487	✓		✓
LAMC1	laminin, gamma 1 (formerly LAMB2)	HGNC:6492	✓		✓
LAMC2	laminin, gamma 2	HGNC:6493	✓
LAMP1	lysosomal-associated membrane protein 1	HGNC:6499	✓		✓
LAMP2	lysosomal-associated membrane protein 2	HGNC:6501	✓		✓		✓
LAMP3	lysosomal-associated membrane protein 3	HGNC:14582	✓
LAP3	leucine aminopeptidase 3	HGNC:18449	✓			✓
LBP	lipopolysaccharide binding protein	HGNC:6517	✓
LCAT	lecithin-cholesterol acyltransferase	HGNC:6522	✓		✓
LCN1	lipocalin 1	HGNC:6525	✓		✓	✓	✓
LCP1	lymphocyte cytosolic protein 1 (L-plastin)	HGNC:6528	✓		✓	✓
LDHA	lactate dehydrogenase A	HGNC:6535	✓		✓	✓	✓
LDHB	lactate dehydrogenase B	HGNC:6541	✓		✓	✓	✓
LDLR	low density lipoprotein receptor	HGNC:6547	✓		✓
LEAP2	liver expressed antimicrobial peptide 2	HGNC:29571	✓		✓
LEMD2	LEM domain containing 2	HGNC:21244		✓
LEP	leptin	HGNC:6553	✓
LFNG	LFNG O-fucosylpeptide 3-beta-N-acetylglucosaminyltransferase	HGNC:6560	✓			✓
LGALS1	lectin, galactoside-binding, soluble, 1	HGNC:6561	✓
LGALS3	lectin, galactoside-binding, soluble, 3	HGNC:6563	✓		✓	✓
LGALS3BP	lectin, galactoside-binding, soluble, 3 binding protein	HGNC:6564	✓		✓	✓	✓
LGALS9	lectin, galactoside-binding, soluble, 9	HGNC:6570	✓		✓
LGMN	legumain	HGNC:9472	✓		✓
LINGO2	leucine rich repeat and Ig domain containing 2	HGNC:21207		✓
LMAN1	lectin, mannose-binding, 1	HGNC:6631	✓			✓
LMAN2	lectin, mannose-binding 2	HGNC:16986	✓		✓		✓
LMAN2L	lectin, mannose-binding 2-like	HGNC:19263	✓
LPO	lactoperoxidase	HGNC:6678	✓			✓
LRG1	leucine-rich alpha-2-glycoprotein 1	HGNC:29480	✓		✓	✓	✓
LRP1	low density lipoprotein receptor-related protein 1	HGNC:6692	✓		✓
LRP2	low density lipoprotein receptor-related protein 2	HGNC:6694	✓		✓		✓
LRRC15	leucine rich repeat containing 15	HGNC:20818	✓		✓
LRRC26	leucine rich repeat containing 26	HGNC:31409				✓
LRRC4B	leucine rich repeat containing 4B	HGNC:25042	✓				✓
LRRC8A	leucine rich repeat containing 8 family, member A	HGNC:19027	✓
LSR	lipolysis stimulated lipoprotein receptor	HGNC:29572				✓
LTA4H	leukotriene A4 hydrolase	HGNC:6710	✓			✓
LTBP1	latent transforming growth factor beta binding protein 1	HGNC:6714	✓
LTBP2	latent transforming growth factor beta binding protein 2	HGNC:6715	✓		✓		✓
LTBP4	latent transforming growth factor beta binding protein 4	HGNC:6717	✓		✓
LTF	lactotransferrin	HGNC:6720	✓		✓	✓	✓
LUM	lumican	HGNC:6724	✓		✓		✓
LXN	latexin	HGNC:13347				✓
LY75	lymphocyte antigen 75	HGNC:6729	✓
LYNX1	Ly6/neurotoxin 1	HGNC:29604	✓		✓
LYPD3	LY6/PLAUR domain containing 3	HGNC:24880	✓		✓
LYVE1	lymphatic vessel endothelial hyaluronan receptor 1	HGNC:14687	✓		✓
LYZ	lysozyme	HGNC:6740	✓		✓	✓	✓
M6PR	mannose-6-phosphate receptor (cation dependent)	HGNC:6752	✓
MADCAM1	mucosal vascular addressin cell adhesion molecule 1	HGNC:6765	✓		✓
MAN1A1	mannosidase, alpha, class 1A, member 1	HGNC:6821	✓		✓		✓
MAN2A1	mannosidase, alpha, class 2A, member 1	HGNC:6824	✓		✓	✓	✓
MAN2B1	mannosidase, alpha, class 2B, member 1	HGNC:6826	✓		✓
MANBA	mannosidase, beta A, lysosomal	HGNC:6831	✓		✓	✓	✓
MAPK3	mitogen-activated protein kinase 3	HGNC:6877	✓			✓
MASP1	mannan-binding lectin serine peptidase 1 (C4/C2 activating component of Ra-reactive factor)	HGNC:6901	✓
MASP2	mannan-binding lectin serine peptidase 2	HGNC:6902	✓		✓
MAT2B	methionine adenosyltransferase II, beta	HGNC:6905				✓
MB	myoglobin	HGNC:6915	✓
MBL2	mannose-binding lectin (protein C) 2, soluble	HGNC:6922	✓
MCAM	melanoma cell adhesion molecule	HGNC:6934	✓		✓
MDH1	malate dehydrogenase 1, NAD (soluble)	HGNC:6970	✓		✓	✓	✓
MEGF8	multiple EGF-like-domains 8	HGNC:3233	✓		✓		✓
MERTK	MER proto-oncogene, tyrosine kinase	HGNC:7027	✓
MFAP4	microfibrillar-associated protein 4	HGNC:7035	✓		✓		✓
MFGE8	milk fat globule-EGF factor 8 protein	HGNC:7036	✓			✓
MFI2	antigen p97 (melanoma associated) identified by monoclonal antibodies 133.2 and 96.5	HGNC:7037	✓		✓
MGP	matrix Gla protein	HGNC:7060	✓
MIF	macrophage migration inhibitory factor (glycosylation-inhibiting factor)	HGNC:7097	✓		✓	✓	✓
MILR1	mast cell immunoglobulin-like receptor 1	HGNC:27570		✓
MINPP1	multiple inositol-polyphosphate phosphatase 1	HGNC:7102	✓		✓		✓
MLLT3	myeloid/lymphoid or mixed-lineage leukemia (trithorax homolog, Drosophila); translocated to, 3	HGNC:7136	✓
MME	membrane metallo-endopeptidase	HGNC:7154	✓		✓
MMP2	matrix metallopeptidase 2 (gelatinase A, 72kDa gelatinase, 72kDa type IV collagenase)	HGNC:7166	✓				✓
MMP8	matrix metallopeptidase 8 (neutrophil collagenase)	HGNC:7175	✓			✓
MMP9	matrix metallopeptidase 9 (gelatinase B, 92kDa gelatinase, 92kDa type IV collagenase)	HGNC:7176	✓		✓	✓
MMRN2	multimerin 2	HGNC:19888	✓		✓
MNDA	myeloid cell nuclear differentiation antigen	HGNC:7183	✓			✓
MOCS2	molybdenum cofactor synthesis 2	HGNC:7193	✓		✓
MPI	mannose phosphate isomerase	HGNC:7216	✓			✓
MPO	myeloperoxidase	HGNC:7218	✓		✓	✓
MPP3	membrane protein, palmitoylated 3 (MAGUK p55 subfamily member 3)	HGNC:7221	✓
MPST	mercaptopyruvate sulfurtransferase	HGNC:7223	✓		✓
MPZL1	myelin protein zero-like 1	HGNC:7226		✓
MPZL2	myelin protein zero-like 2	HGNC:3496		✓
MSLN	mesothelin	HGNC:7371	✓		✓	✓
MSN	moesin	HGNC:7373	✓		✓
MST1	macrophage stimulating 1 (hepatocyte growth factor-like)	HGNC:7380	✓		✓		✓
MTAP	methylthioadenosine phosphorylase	HGNC:7413	✓			✓
MTHFD1	methylenetetrahydrofolate dehydrogenase (NADP+ dependent) 1, methenyltetrahydrofolate cyclohydrolase, formyltetrahydrofolate synthetase	HGNC:7432	✓			✓
MUC1	mucin 1, cell surface associated	HGNC:7508	✓		✓
MUC4	mucin 4, cell surface associated	HGNC:7514				✓
MUC5AC	mucin 5AC, oligomeric mucus/gel-forming	HGNC:7515				✓
MVP	major vault protein	HGNC:7531	✓			✓
MXRA8	matrix-remodelling associated 8	HGNC:7542			✓
MYH14	myosin, heavy chain 14, non-muscle	HGNC:23212	✓			✓
MYH2	myosin, heavy chain 2, skeletal muscle, adult	HGNC:7572	✓
MYH7	myosin, heavy chain 7, cardiac muscle, beta	HGNC:7577	✓
MYH9	myosin, heavy chain 9, non-muscle	HGNC:7579	✓		✓	✓
MYL6	myosin, light chain 6, alkali, smooth muscle and non-muscle	HGNC:7587	✓			✓
MYLK	myosin light chain kinase	HGNC:7590	✓		✓
NAGA	N-acetylgalactosaminidase, alpha-	HGNC:7631	✓		✓		✓
NAGLU	N-acetylglucosaminidase, alpha	HGNC:7632	✓		✓	✓	✓
NAGPA	N-acetylglucosamine-1-phosphodiester alpha-N-acetylglucosaminidase	HGNC:17378	✓
NANS	N-acetylneuraminic acid synthase	HGNC:19237	✓			✓
NAP1L4	nucleosome assembly protein 1-like 4	HGNC:7640	✓			✓
NAPA	N-ethylmaleimide-sensitive factor attachment protein, alpha	HGNC:7641				✓
NBL1	neuroblastoma 1, DAN family BMP antagonist	HGNC:7650	✓
NCAM1	neural cell adhesion molecule 1	HGNC:7656	✓		✓		✓
NCAM2	neural cell adhesion molecule 2	HGNC:7657	✓
NCSTN	nicastrin	HGNC:17091	✓
NDRG2	NDRG family member 2	HGNC:14460	✓			✓
NEGR1	neuronal growth regulator 1	HGNC:17302	✓		✓		✓
NELL2	NEL-like 2 (chicken)	HGNC:7751	✓				✓
NEO1	neogenin 1	HGNC:7754	✓				✓
NEU1	sialidase 1 (lysosomal sialidase)	HGNC:7758	✓		✓	✓
NGFR	nerve growth factor receptor	HGNC:7809	✓		✓
NID1	nidogen 1	HGNC:7821	✓		✓		✓
NID2	nidogen 2 (osteonidogen)	HGNC:13389	✓
NIT2	nitrilase family, member 2	HGNC:29878	✓		✓	✓
NME1	NME/NM23 nucleoside diphosphate kinase 1	HGNC:7849	✓		✓
NME2	NME/NM23 nucleoside diphosphate kinase 2	HGNC:7850	✓		✓	✓	✓
NOMO3	NODAL modulator 3	HGNC:25242		✓	✓
NOTCH2	notch 2	HGNC:7882	✓
NOV	nephroblastoma overexpressed	HGNC:7885	✓		✓
NPC1	Niemann-Pick disease, type C1	HGNC:7897	✓
NPEPPS	aminopeptidase puromycin sensitive	HGNC:7900	✓		✓	✓
NPTN	neuroplastin	HGNC:17867		✓
NQO1	NAD(P)H dehydrogenase, quinone 1	HGNC:2874	✓			✓
NRP1	neuropilin 1	HGNC:8004	✓
NRXN2	neurexin 2	HGNC:8009	✓				✓
NRXN3	neurexin 3	HGNC:8010	✓				✓
NT5E	5'-nucleotidase, ecto (CD73)	HGNC:8021	✓
NTM	neurotrimin	HGNC:17941	✓		✓		✓
NUCB1	nucleobindin 1	HGNC:8043	✓		✓	✓	✓
NUCB2	nucleobindin 2	HGNC:8044	✓			✓
NUDCD2	NudC domain containing 2	HGNC:30535		✓
NUP210	nucleoporin 210kDa	HGNC:30052	✓
OGN	osteoglycin	HGNC:8126	✓
OLA1	Obg-like ATPase 1	HGNC:28833	✓		✓	✓
OLFM1	olfactomedin 1	HGNC:17187	✓
OLFM4	olfactomedin 4	HGNC:17190		✓	✓
OLR1	oxidized low density lipoprotein (lectin-like) receptor 1	HGNC:8133		✓	✓
OPCML	opioid binding protein/cell adhesion molecule-like	HGNC:8143	✓		✓
OPTC	opticin	HGNC:8158	✓				✓
OR1A1	olfactory receptor, family 1, subfamily A, member 1	HGNC:8179	✓
OR2AJ1	olfactory receptor, family 2, subfamily AJ, member 1	HGNC:15001		✓
ORM1	orosomucoid 1	HGNC:8498	✓		✓	✓	✓
OSCAR	osteoclast associated, immunoglobulin-like receptor	HGNC:29960	✓		✓
OTUB1	OTU deubiquitinase, ubiquitin aldehyde binding 1	HGNC:23077	✓			✓
P2RY8	purinergic receptor P2Y, G-protein coupled, 8	HGNC:15524		✓
P4HA1	prolyl 4-hydroxylase, alpha polypeptide I	HGNC:8546	✓
P4HA2	prolyl 4-hydroxylase, alpha polypeptide II	HGNC:8547	✓
PAFAH1B1	platelet-activating factor acetylhydrolase 1b, regulatory subunit 1 (45kDa)	HGNC:8574	✓			✓
PAFAH1B2	platelet-activating factor acetylhydrolase 1b, catalytic subunit 2 (30kDa)	HGNC:8575				✓
PAICS	phosphoribosylaminoimidazole carboxylase, phosphoribosylaminoimidazole succinocarboxamide synthetase	HGNC:8587	✓			✓
PAM	peptidylglycine alpha-amidating monooxygenase	HGNC:8596	✓		✓		✓
PAPPA2	pappalysin 2	HGNC:14615	✓		✓		✓
PARK7	parkinson protein 7	HGNC:16369	✓		✓	✓
PCBP1	poly(rC) binding protein 1	HGNC:8647	✓			✓
PCDH9	protocadherin 9	HGNC:8661	✓
PCSK1N	proprotein convertase subtilisin/kexin type 1 inhibitor	HGNC:17301	✓		✓
PCSK9	proprotein convertase subtilisin/kexin type 9	HGNC:20001	✓
PCYOX1	prenylcysteine oxidase 1	HGNC:20588	✓		✓
PDCD6IP	programmed cell death 6 interacting protein	HGNC:8766	✓		✓	✓
PDE1B	phosphodiesterase 1B, calmodulin-dependent	HGNC:8775	✓
PDE4C	phosphodiesterase 4C, cAMP-specific	HGNC:8782		✓
PDGFB	platelet-derived growth factor beta polypeptide	HGNC:8800	✓
PDGFRB	platelet-derived growth factor receptor, beta polypeptide	HGNC:8804	✓		✓
PDIA6	protein disulfide isomerase family A, member 6	HGNC:30168	✓		✓	✓
PDLIM1	PDZ and LIM domain 1	HGNC:2067	✓			✓
PEBP1	phosphatidylethanolamine binding protein 1	HGNC:8630	✓		✓	✓	✓
PEBP4	phosphatidylethanolamine-binding protein 4	HGNC:28319	✓		✓	✓	✓
PEPD	peptidase D	HGNC:8840	✓		✓
PF4	platelet factor 4	HGNC:8861	✓
PF4V1	platelet factor 4 variant 1	HGNC:8862	✓
PFN1	profilin 1	HGNC:8881	✓		✓	✓
PGAM1	phosphoglycerate mutase 1 (brain)	HGNC:8888	✓		✓	✓	✓
PGAM2	phosphoglycerate mutase 2 (muscle)	HGNC:8889	✓
PGD	phosphogluconate dehydrogenase	HGNC:8891	✓		✓	✓	✓
PGK1	phosphoglycerate kinase 1	HGNC:8896	✓		✓	✓
PGLS	6-phosphogluconolactonase	HGNC:8903	✓		✓	✓
PGLYRP1	peptidoglycan recognition protein 1	HGNC:8904	✓		✓
PGLYRP2	peptidoglycan recognition protein 2	HGNC:30013	✓		✓		✓
PGM1	phosphoglucomutase 1	HGNC:8905	✓			✓
PI16	peptidase inhibitor 16	HGNC:21245	✓		✓
PIEZO1	piezo-type mechanosensitive ion channel component 1	HGNC:28993	✓
PIGR	polymeric immunoglobulin receptor	HGNC:8968	✓		✓	✓
PIGS	phosphatidylinositol glycan anchor biosynthesis, class S	HGNC:14937	✓
PIGT	phosphatidylinositol glycan anchor biosynthesis, class T	HGNC:14938	✓
PIK3IP1	phosphoinositide-3-kinase interacting protein 1	HGNC:24942	✓		✓
PIP	prolactin-induced protein	HGNC:8993	✓		✓	✓	✓
PKM	pyruvate kinase, muscle	HGNC:9021	✓			✓
PLAT	plasminogen activator, tissue	HGNC:9051	✓
PLAU	plasminogen activator, urokinase	HGNC:9052	✓		✓
PLAUR	plasminogen activator, urokinase receptor	HGNC:9053		✓	✓
PLBD2	phospholipase B domain containing 2	HGNC:27283	✓		✓
PLD3	phospholipase D family, member 3	HGNC:17158		✓	✓
PLG	plasminogen	HGNC:9071	✓		✓	✓	✓
PLIN3	perilipin 3	HGNC:16893	✓			✓
PLOD1	procollagen-lysine, 2-oxoglutarate 5-dioxygenase 1	HGNC:9081	✓				✓
PLOD3	procollagen-lysine, 2-oxoglutarate 5-dioxygenase 3	HGNC:9083	✓		✓
PLS1	plastin 1	HGNC:9090	✓			✓
PLTP	phospholipid transfer protein	HGNC:9093	✓			✓
PLXDC2	plexin domain containing 2	HGNC:21013	✓		✓
PLXNB1	plexin B1	HGNC:9103	✓
PMFBP1	polyamine modulated factor 1 binding protein 1	HGNC:17728	✓
PNP	purine nucleoside phosphorylase	HGNC:7892	✓		✓		✓
PODXL	podocalyxin-like	HGNC:9171	✓		✓	✓
PODXL2	podocalyxin-like 2	HGNC:17936		✓
POFUT2	protein O-fucosyltransferase 2	HGNC:14683		✓
PON1	paraoxonase 1	HGNC:9204	✓				✓
PON2	paraoxonase 2	HGNC:9205	✓
POSTN	periostin, osteoblast specific factor	HGNC:16953	✓
PPA1	pyrophosphatase (inorganic) 1	HGNC:9226	✓			✓
PPBP	pro-platelet basic protein (chemokine (C-X-C motif) ligand 7)	HGNC:9240	✓
PPIA	peptidylprolyl isomerase A (cyclophilin A)	HGNC:9253	✓			✓
PPIB	peptidylprolyl isomerase B (cyclophilin B)	HGNC:9255	✓		✓
PPIC	peptidylprolyl isomerase C (cyclophilin C)	HGNC:9256	✓		✓	✓
PPP1CB	protein phosphatase 1, catalytic subunit, beta isozyme	HGNC:9282	✓			✓
PPP1R7	protein phosphatase 1, regulatory subunit 7	HGNC:9295	✓			✓
PPP2CA	protein phosphatase 2, catalytic subunit, alpha isozyme	HGNC:9299	✓			✓
PPP2R4	protein phosphatase 2A activator, regulatory subunit 4	HGNC:9308	✓			✓
PPT1	palmitoyl-protein thioesterase 1	HGNC:9325	✓		✓	✓
PRCP	prolylcarboxypeptidase (angiotensinase C)	HGNC:9344	✓		✓
PRDX1	peroxiredoxin 1	HGNC:9352	✓		✓	✓	✓
PRDX2	peroxiredoxin 2	HGNC:9353	✓		✓		✓
PRDX4	peroxiredoxin 4	HGNC:17169	✓			✓
PRDX5	peroxiredoxin 5	HGNC:9355	✓		✓	✓	✓
PRDX6	peroxiredoxin 6	HGNC:16753	✓		✓	✓	✓
PRG4	proteoglycan 4	HGNC:9364	✓
PRKCSH	protein kinase C substrate 80K-H	HGNC:9411	✓		✓		✓
PRNP	prion protein	HGNC:9449	✓		✓	✓	✓
PROC	protein C (inactivator of coagulation factors Va and VIIIa)	HGNC:9451	✓
PROCR	protein C receptor, endothelial	HGNC:9452	✓		✓
PROL1	proline rich, lacrimal 1	HGNC:17279	✓			✓
PROM1	prominin 1	HGNC:9454	✓		✓	✓
PROM2	prominin 2	HGNC:20685		✓	✓
PROS1	protein S (alpha)	HGNC:9456	✓				✓
PROZ	protein Z, vitamin K-dependent plasma glycoprotein	HGNC:9460	✓		✓
PRPS1L1	phosphoribosyl pyrophosphate synthetase 1-like 1	HGNC:9463				✓
PRR4	proline rich 4 (lacrimal)	HGNC:18020	✓			✓
PRSS2	protease, serine, 2 (trypsin 2)	HGNC:9483	✓		✓
PRTN3	proteinase 3	HGNC:9495	✓		✓	✓
PSAP	prosaposin	HGNC:9498	✓		✓	✓	✓
PSCA	prostate stem cell antigen	HGNC:9500		✓
PSG1	pregnancy specific beta-1-glycoprotein 1	HGNC:9514	✓
PSMA1	proteasome (prosome, macropain) subunit, alpha type, 1	HGNC:9530	✓			✓
PSMA2	proteasome (prosome, macropain) subunit, alpha type, 2	HGNC:9531	✓		✓	✓
PSMA3	proteasome (prosome, macropain) subunit, alpha type, 3	HGNC:9532	✓		✓	✓
PSMA4	proteasome (prosome, macropain) subunit, alpha type, 4	HGNC:9533	✓			✓
PSMA5	proteasome (prosome, macropain) subunit, alpha type, 5	HGNC:9534	✓			✓	✓
PSMA6	proteasome (prosome, macropain) subunit, alpha type, 6	HGNC:9535	✓		✓	✓
PSMA7	proteasome (prosome, macropain) subunit, alpha type, 7	HGNC:9536	✓		✓	✓	✓
PSMC3	proteasome (prosome, macropain) 26S subunit, ATPase, 3	HGNC:9549	✓			✓
PSMC5	proteasome (prosome, macropain) 26S subunit, ATPase, 5	HGNC:9552	✓			✓
PSMC6	proteasome (prosome, macropain) 26S subunit, ATPase, 6	HGNC:9553	✓			✓
PSMD1	proteasome (prosome, macropain) 26S subunit, non-ATPase, 1	HGNC:9554	✓			✓
PSMD11	proteasome (prosome, macropain) 26S subunit, non-ATPase, 11	HGNC:9556	✓			✓
PSMD13	proteasome (prosome, macropain) 26S subunit, non-ATPase, 13	HGNC:9558	✓			✓
PSMD2	proteasome (prosome, macropain) 26S subunit, non-ATPase, 2	HGNC:9559	✓			✓
PSMD5	proteasome (prosome, macropain) 26S subunit, non-ATPase, 5	HGNC:9563	✓			✓
PSME1	proteasome (prosome, macropain) activator subunit 1 (PA28 alpha)	HGNC:9568	✓			✓
PSME2	proteasome (prosome, macropain) activator subunit 2 (PA28 beta)	HGNC:9569	✓			✓
PTGDS	prostaglandin D2 synthase 21kDa (brain)	HGNC:9592	✓		✓		✓
PTGFRN	prostaglandin F2 receptor inhibitor	HGNC:9601	✓
PTGR1	prostaglandin reductase 1	HGNC:18429	✓		✓
PTK7	protein tyrosine kinase 7	HGNC:9618	✓		✓
PTPRC	protein tyrosine phosphatase, receptor type, C	HGNC:9666	✓
PTPRF	protein tyrosine phosphatase, receptor type, F	HGNC:9670	✓		✓	✓
PTPRJ	protein tyrosine phosphatase, receptor type, J	HGNC:9673	✓		✓
PTPRK	protein tyrosine phosphatase, receptor type, K	HGNC:9674	✓		✓
PTPRM	protein tyrosine phosphatase, receptor type, M	HGNC:9675	✓		✓
PTPRS	protein tyrosine phosphatase, receptor type, S	HGNC:9681	✓		✓	✓
PTPRZ1	protein tyrosine phosphatase, receptor-type, Z polypeptide 1	HGNC:9685	✓				✓
PVR	poliovirus receptor	HGNC:9705	✓		✓
PVRL1	poliovirus receptor-related 1 (herpesvirus entry mediator C)	HGNC:9706	✓		✓
PVRL2	poliovirus receptor-related 2 (herpesvirus entry mediator B)	HGNC:9707	✓		✓
PVRL4	poliovirus receptor-related 4	HGNC:19688			✓	✓
PXDN	peroxidasin homolog (Drosophila)	HGNC:14966	✓
PYGL	phosphorylase, glycogen, liver	HGNC:9725	✓			✓
PZP	pregnancy-zone protein	HGNC:9750	✓
QARS	glutaminyl-tRNA synthetase	HGNC:9751	✓			✓
QPCT	glutaminyl-peptide cyclotransferase	HGNC:9753	✓		✓		✓
QPRT	quinolinate phosphoribosyltransferase	HGNC:9755	✓		✓
QSOX1	quiescin Q6 sulfhydryl oxidase 1	HGNC:9756	✓		✓	✓
RAB11B	RAB11B, member RAS oncogene family	HGNC:9761				✓
RAB1A	RAB1A, member RAS oncogene family	HGNC:9758	✓		✓	✓
RAB2A	RAB2A, member RAS oncogene family	HGNC:9763	✓			✓
RAB35	RAB35, member RAS oncogene family	HGNC:9774	✓
RAB5A	RAB5A, member RAS oncogene family	HGNC:9783	✓		✓
RAB8B	RAB8B, member RAS oncogene family	HGNC:30273	✓			✓
RAP1B	RAP1B, member of RAS oncogene family	HGNC:9857	✓
RARRES1	retinoic acid receptor responder (tazarotene induced) 1	HGNC:9867	✓				✓
RBM23	RNA binding motif protein 23	HGNC:20155	✓
RBP1	retinol binding protein 1, cellular	HGNC:9919	✓			✓
RBP3	retinol binding protein 3, interstitial	HGNC:9921	✓				✓
RBP4	retinol binding protein 4, plasma	HGNC:9922	✓		✓		✓
RCN1	reticulocalbin 1, EF-hand calcium binding domain	HGNC:9934	✓			✓
REG1A	regenerating islet-derived 1 alpha	HGNC:9951	✓		✓
RELN	reelin	HGNC:9957	✓				✓
RETN	resistin	HGNC:20389	✓		✓
RNASE3	ribonuclease, RNase A family, 3	HGNC:10046	✓		✓	✓
RNASET2	ribonuclease T2	HGNC:21686	✓		✓		✓
RNF149	ring finger protein 149	HGNC:23137		✓	✓
RNF19A	ring finger protein 19A, RBR E3 ubiquitin protein ligase	HGNC:13432	✓
RNH1	ribonuclease/angiogenin inhibitor 1	HGNC:10074	✓		✓	✓
ROBO4	roundabout, axon guidance receptor, homolog 4 (Drosophila)	HGNC:17985	✓		✓
ROR1	receptor tyrosine kinase-like orphan receptor 1	HGNC:10256	✓		✓
RPLP0	ribosomal protein, large, P0	HGNC:10371	✓			✓
RPLP1	ribosomal protein, large, P1	HGNC:10372	✓			✓
RPN2	ribophorin II	HGNC:10382	✓
RPS27A	ribosomal protein S27a	HGNC:10417				✓
RPS3	ribosomal protein S3	HGNC:10420	✓			✓
RPS8	ribosomal protein S8	HGNC:10441	✓
RPSA	ribosomal protein SA	HGNC:6502	✓			✓
RPUSD3	RNA pseudouridylate synthase domain containing 3	HGNC:28437		✓
RS1	retinoschisin 1	HGNC:10457		✓			✓
RTN4RL2	reticulon 4 receptor-like 2	HGNC:23053	✓		✓
RUVBL2	RuvB-like AAA ATPase 2	HGNC:10475	✓			✓
S100A11	S100 calcium binding protein A11	HGNC:10488	✓		✓	✓
S100A4	S100 calcium binding protein A4	HGNC:10494	✓			✓
S100A6	S100 calcium binding protein A6	HGNC:10496	✓		✓	✓	✓
S100A7	S100 calcium binding protein A7	HGNC:10497	✓		✓		✓
S100A8	S100 calcium binding protein A8	HGNC:10498	✓		✓	✓	✓
S100A9	S100 calcium binding protein A9	HGNC:10499	✓		✓	✓	✓
S100P	S100 calcium binding protein P	HGNC:10504	✓		✓	✓
S1PR2	sphingosine-1-phosphate receptor 2	HGNC:3169	✓
S1PR4	sphingosine-1-phosphate receptor 4	HGNC:3170	✓
SAA1	serum amyloid A1	HGNC:10513	✓
SAA2	serum amyloid A2	HGNC:10514	✓
SAA4	serum amyloid A4, constitutive	HGNC:10516	✓				✓
SAG	S-antigen; retina and pineal gland (arrestin)	HGNC:10521	✓				✓
SBSPON	somatomedin B and thrombospondin, type 1 domain containing	HGNC:30362		✓
SCARB1	scavenger receptor class B, member 1	HGNC:1664		✓
SCARB2	scavenger receptor class B, member 2	HGNC:1665	✓		✓
SCCPDH	saccharopine dehydrogenase (putative)	HGNC:24275		✓
SCGB1A1	secretoglobin, family 1A, member 1 (uteroglobin)	HGNC:12523	✓		✓
SCGB1D1	secretoglobin, family 1D, member 1	HGNC:18395				✓
SCGB1D2	secretoglobin, family 1D, member 2	HGNC:18396	✓				✓
SCGB2A1	secretoglobin, family 2A, member 1	HGNC:7051		✓		✓
SCPEP1	serine carboxypeptidase 1	HGNC:29507			✓
SCRN2	secernin 2	HGNC:30381	✓		✓	✓
SDC2	syndecan 2	HGNC:10659			✓
SDC4	syndecan 4	HGNC:10661	✓		✓
SDCBP	syndecan binding protein (syntenin)	HGNC:10662	✓		✓	✓
SDF4	stromal cell derived factor 4	HGNC:24188	✓		✓	✓	✓
SECTM1	secreted and transmembrane 1	HGNC:10707	✓		✓
SEL1L	sel-1 suppressor of lin-12-like (C. elegans)	HGNC:10717	✓
SELENBP1	selenium binding protein 1	HGNC:10719	✓		✓	✓	✓
SELL	selectin L	HGNC:10720	✓
SEMA3A	sema domain, immunoglobulin domain (Ig), short basic domain, secreted, (semaphorin) 3A	HGNC:10723	✓				✓
SEMA4B	sema domain, immunoglobulin domain (Ig), transmembrane domain (TM) and short cytoplasmic domain, (semaphorin) 4B	HGNC:10730	✓		✓		✓
SEMA4D	sema domain, immunoglobulin domain (Ig), transmembrane domain (TM) and short cytoplasmic domain, (semaphorin) 4D	HGNC:10732	✓
SEMA7A	semaphorin 7A, GPI membrane anchor (John Milton Hagen blood group)	HGNC:10741	✓				✓
SEMG1	semenogelin I	HGNC:10742	✓		✓
SEPP1	selenoprotein P, plasma, 1	HGNC:10751	✓				✓
SEPT2	septin 2	HGNC:7729	✓			✓
SEPT7	septin 7	HGNC:1717	✓			✓
SERINC1	serine incorporator 1	HGNC:13464	✓
SERPINA1	serpin peptidase inhibitor, clade A (alpha-1 antiproteinase, antitrypsin), member 1	HGNC:8941	✓		✓	✓	✓
SERPINA10	serpin peptidase inhibitor, clade A (alpha-1 antiproteinase, antitrypsin), member 10	HGNC:15996	✓				✓
SERPINA3	serpin peptidase inhibitor, clade A (alpha-1 antiproteinase, antitrypsin), member 3	HGNC:16	✓		✓	✓	✓
SERPINA4	serpin peptidase inhibitor, clade A (alpha-1 antiproteinase, antitrypsin), member 4	HGNC:8948	✓		✓		✓
SERPINA5	serpin peptidase inhibitor, clade A (alpha-1 antiproteinase, antitrypsin), member 5	HGNC:8723	✓		✓		✓
SERPINA6	serpin peptidase inhibitor, clade A (alpha-1 antiproteinase, antitrypsin), member 6	HGNC:1540	✓		✓		✓
SERPINA7	serpin peptidase inhibitor, clade A (alpha-1 antiproteinase, antitrypsin), member 7	HGNC:11583	✓		✓		✓
SERPINB1	serpin peptidase inhibitor, clade B (ovalbumin), member 1	HGNC:3311	✓		✓	✓	✓
SERPINB12	serpin peptidase inhibitor, clade B (ovalbumin), member 12	HGNC:14220	✓		✓		✓
SERPINB2	serpin peptidase inhibitor, clade B (ovalbumin), member 2	HGNC:8584	✓			✓
SERPINB3	serpin peptidase inhibitor, clade B (ovalbumin), member 3	HGNC:10569	✓		✓		✓
SERPINB5	serpin peptidase inhibitor, clade B (ovalbumin), member 5	HGNC:8949	✓		✓	✓
SERPINB6	serpin peptidase inhibitor, clade B (ovalbumin), member 6	HGNC:8950	✓		✓	✓	✓
SERPINC1	serpin peptidase inhibitor, clade C (antithrombin), member 1	HGNC:775	✓		✓	✓	✓
SERPIND1	serpin peptidase inhibitor, clade D (heparin cofactor), member 1	HGNC:4838	✓				✓
SERPINF1	serpin peptidase inhibitor, clade F (alpha-2 antiplasmin, pigment epithelium derived factor), member 1	HGNC:8824	✓		✓	✓	✓
SERPINF2	serpin peptidase inhibitor, clade F (alpha-2 antiplasmin, pigment epithelium derived factor), member 2	HGNC:9075	✓		✓		✓
SERPING1	serpin peptidase inhibitor, clade G (C1 inhibitor), member 1	HGNC:1228	✓		✓	✓	✓
SERPINI1	serpin peptidase inhibitor, clade I (neuroserpin), member 1	HGNC:8943	✓		✓	✓	✓
SEZ6L	seizure related 6 homolog (mouse)-like	HGNC:10763	✓		✓		✓
SEZ6L2	seizure related 6 homolog (mouse)-like 2	HGNC:30844	✓		✓
SFN	stratifin	HGNC:10773	✓		✓	✓	✓
SFRP1	secreted frizzled-related protein 1	HGNC:10776				✓
SGSH	N-sulfoglucosamine sulfohydrolase	HGNC:10818		✓	✓
SH3BGRL	SH3 domain binding glutamate-rich protein like	HGNC:10823	✓		✓
SH3BGRL3	SH3 domain binding glutamate-rich protein like 3	HGNC:15568	✓		✓	✓
SH3GLB1	SH3-domain GRB2-like endophilin B1	HGNC:10833	✓			✓
SHBG	sex hormone-binding globulin	HGNC:10839	✓		✓		✓
SHMT1	serine hydroxymethyltransferase 1 (soluble)	HGNC:10850	✓		✓	✓
SIAE	sialic acid acetylesterase	HGNC:18187	✓		✓		✓
SIRPA	signal-regulatory protein alpha	HGNC:9662	✓		✓
SIRPB1	signal-regulatory protein beta 1	HGNC:15928	✓		✓
SIRPG	signal-regulatory protein gamma	HGNC:15757	✓
SLAMF7	SLAM family member 7	HGNC:21394		✓
SLC12A2	solute carrier family 12 (sodium/potassium/chloride transporter), member 2	HGNC:10911	✓		✓
SLC12A9	solute carrier family 12, member 9	HGNC:17435		✓
SLC1A4	solute carrier family 1 (glutamate/neutral amino acid transporter), member 4	HGNC:10942	✓
SLC1A5	solute carrier family 1 (neutral amino acid transporter), member 5	HGNC:10943	✓
SLC22A23	solute carrier family 22, member 23	HGNC:21106		✓
SLC22A5	solute carrier family 22 (organic cation/carnitine transporter), member 5	HGNC:10969	✓
SLC29A1	solute carrier family 29 (equilibrative nucleoside transporter), member 1	HGNC:11003	✓
SLC2A1	solute carrier family 2 (facilitated glucose transporter), member 1	HGNC:11005	✓
SLC2A5	solute carrier family 2 (facilitated glucose/fructose transporter), member 5	HGNC:11010	✓		✓
SLC39A10	solute carrier family 39 (zinc transporter), member 10	HGNC:20861		✓
SLC39A14	solute carrier family 39 (zinc transporter), member 14	HGNC:20858	✓
SLC39A6	solute carrier family 39 (zinc transporter), member 6	HGNC:18607		✓
SLC39A8	solute carrier family 39 (zinc transporter), member 8	HGNC:20862		✓
SLC3A2	solute carrier family 3 (amino acid transporter heavy chain), member 2	HGNC:11026	✓		✓		✓
SLC44A2	solute carrier family 44 (choline transporter), member 2	HGNC:17292		✓	✓
SLC4A7	solute carrier family 4, sodium bicarbonate cotransporter, member 7	HGNC:11033	✓
SLC6A6	solute carrier family 6 (neurotransmitter transporter), member 6	HGNC:11052		✓
SLC6A9	solute carrier family 6 (neurotransmitter transporter, glycine), member 9	HGNC:11056	✓
SLC7A1	solute carrier family 7 (cationic amino acid transporter, y+ system), member 1	HGNC:11057	✓
SLCO4A1	solute carrier organic anion transporter family, member 4A1	HGNC:10953	✓
SLIT3	slit homolog 3 (Drosophila)	HGNC:11087	✓			✓
SLPI	secretory leukocyte peptidase inhibitor	HGNC:11092	✓		✓
SMPDL3A	sphingomyelin phosphodiesterase, acid-like 3A	HGNC:17389	✓
SMPDL3B	sphingomyelin phosphodiesterase, acid-like 3B	HGNC:21416	✓
SNCA	synuclein, alpha (non A4 component of amyloid precursor)	HGNC:11138	✓
SOD1	superoxide dismutase 1, soluble	HGNC:11179	✓		✓		✓
SOD2	superoxide dismutase 2, mitochondrial	HGNC:11180	✓			✓
SOD3	superoxide dismutase 3, extracellular	HGNC:11181	✓		✓		✓
SORCS1	sortilin-related VPS10 domain containing receptor 1	HGNC:16697	✓				✓
SORD	sorbitol dehydrogenase	HGNC:11184	✓		✓	✓
SORL1	sortilin-related receptor, L(DLR class) A repeats containing	HGNC:11185	✓		✓
SORT1	sortilin 1	HGNC:11186	✓		✓
SPARC	secreted protein, acidic, cysteine-rich (osteonectin)	HGNC:11219	✓				✓
SPARCL1	SPARC-like 1 (hevin)	HGNC:11220	✓		✓	✓	✓
SPINK1	serine peptidase inhibitor, Kazal type 1	HGNC:11244	✓		✓
SPINK5	serine peptidase inhibitor, Kazal type 5	HGNC:15464	✓		✓
SPINT1	serine peptidase inhibitor, Kunitz type 1	HGNC:11246	✓		✓
SPINT2	serine peptidase inhibitor, Kunitz type, 2	HGNC:11247	✓		✓
SPOCK1	sparc/osteonectin, cwcv and kazal-like domains proteoglycan (testican) 1	HGNC:11251	✓				✓
SPOCK2	sparc/osteonectin, cwcv and kazal-like domains proteoglycan (testican) 2	HGNC:13564	✓				✓
SPON1	spondin 1, extracellular matrix protein	HGNC:11252	✓				✓
SPP2	secreted phosphoprotein 2, 24kDa	HGNC:11256	✓
SPTAN1	spectrin, alpha, non-erythrocytic 1	HGNC:11273	✓			✓
SSB	Sjogren syndrome antigen B (autoantigen La)	HGNC:11316				✓
SSR1	signal sequence receptor, alpha	HGNC:11323	✓
ST13	suppression of tumorigenicity 13 (colon carcinoma) (Hsp70 interacting protein)	HGNC:11343	✓			✓
ST14	suppression of tumorigenicity 14 (colon carcinoma)	HGNC:11344	✓
ST3GAL1	ST3 beta-galactoside alpha-2,3-sialyltransferase 1	HGNC:10862	✓			✓
ST3GAL4	ST3 beta-galactoside alpha-2,3-sialyltransferase 4	HGNC:10864	✓
ST3GAL6	ST3 beta-galactoside alpha-2,3-sialyltransferase 6	HGNC:18080	✓			✓
ST6GAL1	ST6 beta-galactosamide alpha-2,6-sialyltranferase 1	HGNC:10860	✓
STEAP4	STEAP family member 4	HGNC:21923	✓			✓
STIM1	stromal interaction molecule 1	HGNC:11386	✓
STK39	serine threonine kinase 39	HGNC:17717	✓			✓
STOM	stomatin	HGNC:3383	✓		✓	✓
STT3A	STT3A, subunit of the oligosaccharyltransferase complex (catalytic)	HGNC:6172	✓
STT3B	STT3B, subunit of the oligosaccharyltransferase complex (catalytic)	HGNC:30611		✓
SUMF1	sulfatase modifying factor 1	HGNC:20376	✓
SUN2	Sad1 and UNC84 domain containing 2	HGNC:14210	✓
SUSD2	sushi domain containing 2	HGNC:30667	✓		✓
SYPL1	synaptophysin-like 1	HGNC:11507		✓
TACSTD2	tumor-associated calcium signal transducer 2	HGNC:11530	✓
TAGLN2	transgelin 2	HGNC:11554	✓		✓	✓
TALDO1	transaldolase 1	HGNC:11559	✓		✓	✓	✓
TCN1	transcobalamin I (vitamin B12 binding protein, R binder family)	HGNC:11652	✓			✓
TCN2	transcobalamin II	HGNC:11653	✓		✓	✓
TF	transferrin	HGNC:11740	✓		✓	✓	✓
TFRC	transferrin receptor	HGNC:11763	✓
TGFB2	transforming growth factor, beta 2	HGNC:11768		✓			✓
TGFBI	transforming growth factor, beta-induced, 68kDa	HGNC:11771	✓				✓
TGM2	transglutaminase 2	HGNC:11778	✓			✓
TGM3	transglutaminase 3	HGNC:11779	✓				✓
TGOLN2	trans-golgi network protein 2	HGNC:15450	✓
THBS1	thrombospondin 1	HGNC:11785	✓		✓	✓
THBS2	thrombospondin 2	HGNC:11786	✓
THBS4	thrombospondin 4	HGNC:11788	✓		✓		✓
THY1	Thy-1 cell surface antigen	HGNC:11801	✓		✓
TIMP1	TIMP metallopeptidase inhibitor 1	HGNC:11820	✓		✓	✓	✓
TIMP2	TIMP metallopeptidase inhibitor 2	HGNC:11821	✓		✓		✓
TINAGL1	tubulointerstitial nephritis antigen-like 1	HGNC:19168		✓	✓		✓
TKT	transketolase	HGNC:11834	✓			✓	✓
TLN1	talin 1	HGNC:11845	✓			✓
TM9SF3	transmembrane 9 superfamily member 3	HGNC:21529	✓
TMED4	transmembrane emp24 protein transport domain containing 4	HGNC:22301		✓
TMED9	transmembrane emp24 protein transport domain containing 9	HGNC:24878		✓
TMEM106B	transmembrane protein 106B	HGNC:22407		✓
TMEM2	transmembrane protein 2	HGNC:11869		✓
TMEM206	transmembrane protein 206	HGNC:25593		✓
TMEM30B	transmembrane protein 30B	HGNC:27254		✓
TMEM87A	transmembrane protein 87A	HGNC:24522		✓
TMX3	thioredoxin-related transmembrane protein 3	HGNC:24718		✓
TNC	tenascin C	HGNC:5318	✓		✓
TNR	tenascin R	HGNC:11953			✓		✓
TNXB	tenascin XB	HGNC:11976	✓		✓
TP73	tumor protein p73	HGNC:12003	✓
TPBG	trophoblast glycoprotein	HGNC:12004		✓
TPD52	tumor protein D52	HGNC:12005	✓
TPI1	triosephosphate isomerase 1	HGNC:12009	✓		✓	✓	✓
TPM2	tropomyosin 2 (beta)	HGNC:12011	✓
TPM3	tropomyosin 3	HGNC:12012	✓				✓
TPM4	tropomyosin 4	HGNC:12013	✓
TPP1	tripeptidyl peptidase I	HGNC:2073	✓		✓		✓
TPSAB1	tryptase alpha/beta 1	HGNC:12019		✓
TPSB2	tryptase beta 2 (gene/pseudogene)	HGNC:14120		✓
TRBC1	T cell receptor beta constant 1	HGNC:12156		✓
TREML2	triggering receptor expressed on myeloid cells-like 2	HGNC:21092	✓
TSHR	thyroid stimulating hormone receptor	HGNC:12373	✓
TSPAN1	tetraspanin 1	HGNC:20657		✓	✓
TSPAN13	tetraspanin 13	HGNC:21643		✓
TSPAN6	tetraspanin 6	HGNC:11858		✓
TSTA3	tissue specific transplantation antigen P35B	HGNC:12390	✓			✓
TTLL6	tubulin tyrosine ligase-like family, member 6	HGNC:26664		✓
TTR	transthyretin	HGNC:12405	✓		✓	✓	✓
TUBA1A	tubulin, alpha 1a	HGNC:20766	✓			✓
TUBA1C	tubulin, alpha 1c	HGNC:20768	✓			✓
TUBA4A	tubulin, alpha 4a	HGNC:12407	✓			✓
TUBB	tubulin, beta class I	HGNC:20778	✓			✓
TUBB4A	tubulin, beta 4A class IVa	HGNC:20774	✓
TUBB4B	tubulin, beta 4B class IVb	HGNC:20771	✓
TUT1	terminal uridylyl transferase 1, U6 snRNA-specific	HGNC:26184	✓			✓
TWF1	twinfilin actin-binding protein 1	HGNC:9620	✓			✓
TXN	thioredoxin	HGNC:12435	✓		✓	✓
TYMP	thymidine phosphorylase	HGNC:3148	✓			✓
UBA1	ubiquitin-like modifier activating enzyme 1	HGNC:12469	✓		✓	✓
UBA7	ubiquitin-like modifier activating enzyme 7	HGNC:12471	✓			✓
UBB	ubiquitin B	HGNC:12463			✓
UCHL1	ubiquitin carboxyl-terminal esterase L1 (ubiquitin thiolesterase)	HGNC:12513	✓
UGGT1	UDP-glucose glycoprotein glucosyltransferase 1	HGNC:15663	✓			✓
UMOD	uromodulin	HGNC:12559	✓		✓
UMPS	uridine monophosphate synthetase	HGNC:12563	✓			✓
UPK1B	uroplakin 1B	HGNC:12578				✓
USP5	ubiquitin specific peptidase 5 (isopeptidase T)	HGNC:12628	✓			✓
VAPA	VAMP (vesicle-associated membrane protein)-associated protein A, 33kDa	HGNC:12648	✓
VASN	vasorin	HGNC:18517	✓		✓		✓
VAT1	vesicle amine transport 1	HGNC:16919	✓		✓
VCAN	versican	HGNC:2464	✓
VCL	vinculin	HGNC:12665	✓		✓	✓
VCP	valosin containing protein	HGNC:12666	✓		✓	✓
VGF	VGF nerve growth factor inducible	HGNC:12684	✓		✓
VIM	vimentin	HGNC:12692	✓			✓
VMO1	vitelline membrane outer layer 1 homolog (chicken)	HGNC:30387	✓		✓
VNN1	vanin 1	HGNC:12705	✓		✓
VPS4B	vacuolar protein sorting 4 homolog B (S. cerevisiae)	HGNC:10895	✓		✓	✓
VSIG4	V-set and immunoglobulin domain containing 4	HGNC:17032	✓		✓
VTCN1	V-set domain containing T cell activation inhibitor 1	HGNC:28873		✓
VTN	vitronectin	HGNC:12724	✓		✓		✓
VWA1	von Willebrand factor A domain containing 1	HGNC:30910		✓	✓
VWF	von Willebrand factor	HGNC:12726	✓		✓
WDR1	WD repeat domain 1	HGNC:12754	✓			✓
WIF1	WNT inhibitory factor 1	HGNC:18081	✓				✓
WISP1	WNT1 inducible signaling pathway protein 1	HGNC:12769		✓
WISP2	WNT1 inducible signaling pathway protein 2	HGNC:12770	✓		✓
WNT7A	wingless-type MMTV integration site family, member 7A	HGNC:12786	✓
YWHAE	tyrosine 3-monooxygenase/tryptophan 5-monooxygenase activation protein, epsilon	HGNC:12851	✓			✓
YWHAG	tyrosine 3-monooxygenase/tryptophan 5-monooxygenase activation protein, gamma	HGNC:12852	✓		✓
YWHAH	tyrosine 3-monooxygenase/tryptophan 5-monooxygenase activation protein, eta	HGNC:12853	✓			✓
YWHAQ	tyrosine 3-monooxygenase/tryptophan 5-monooxygenase activation protein, theta	HGNC:12854	✓		✓	✓
YWHAZ	tyrosine 3-monooxygenase/tryptophan 5-monooxygenase activation protein, zeta	HGNC:12855	✓		✓	✓	✓
ZC3H11A	zinc finger CCCH-type containing 11A	HGNC:29093	✓
ZCCHC2	zinc finger, CCHC domain containing 2	HGNC:22916	✓
ZG16B	zymogen granule protein 16B	HGNC:30456	✓		✓	✓
ZNF781	zinc finger protein 781	HGNC:26745		✓
a) Nanjappa, V., Thomas, J. K., Marimuthu, A., Muthusamy, B., et al., Nucleic Acids Res 2014, 42, D959-965; Farrah, T., Deutsch, E. W., Omenn, G. S., Campbell, D. S., et al., Mol Cell Proteomics 2011, 10, M110.006353.
b) Triebel, F., Hacene, K., Pichon, M. F., Cancer Lett 2006, 235, 147-153; Polanski, M., Anderson, N. L., Biomark Insights 2007, 1, 1-48; Zhang, H., Liu, A. Y., Loriaux, P., Wollscheid, B., et al., Mol Cell Proteomics 2007, 6, 64-71.
c) Adachi, J., Kumar, C., Zhang, Y., Olsen, J. V., Mann, M., Genome Biol 2006, 7, R80; Marimuthu, A., O'Meally, R. N., Chaerkady, R., Subbannayya, Y., et al., J Proteome Res 2011, 10, 2734-2743.
d) de Souza, G. A., Godoy, L. M., Mann, M., Genome Biol 2006, 7, R72.
e) Chowdhury, U. R., Madden, B. J., Charlesworth, M. C., Fautsch, M. P., Invest Ophthalmol Vis Sci 2010, 51, 4921-4931.

## Sheet: Table S2
Table S2. Selected Peptide Sequence
Peptide ID	Sequence	Targeted Proteins	References a)	Quantotypic Peptides b)
P_00001	AAAATGTIFTFR	SERPINA5	1	✓
P_00002	AAAITSDILEALGR	POSTN	2
P_00003	AACLPLPGYR	LCP1	2	✓
P_00004	AADDTWEPFASGK	TTR	1
P_00005	AADLNGDLTATR	RCN1	1	✓
P_00006	AAFDDAIAELDTLSEESYK	YWHAE	2
P_00007	AAFENWEVEVTFR	LMAN1	2	✓
P_00008	AAGDVDIGDAAYYFER	TACSTD2	2	✓
P_00009	AAGFISVLK	SLC2A5	2	✓
P_00010	AAGVNVEPFWPGLFAK	RPLP1	1	✓
P_00011	AAISGENAGLVR	ITIH1	1
P_00012	AALEDTLAETEAR	KRT19	2	✓
P_00013	AALPAQELEEYNK	ACE	1	✓
P_00014	AANDPFTIVHGNTGK	LY75	2	✓
P_00015	AANYTSSLNLPDK	SEMA4D	2	✓
P_00016	AAPDITGHK	NPTN	2	✓
P_00017	AAQGLLACGVAQGALR	PGLYRP1	1	✓
P_00018	AATSDLEHYDK	NUCB2	1	✓
P_00019	AAVESLGFILFR	PSMD1	1	✓
P_00020	AAYNLVR	COTL1	1	✓
P_00021	AAYQVAALPK	HRSP12	1	✓
P_00022	ACANPAAGSVILLENLR	PGK1	1	✓
P_00023	ACDGINDCGDQSDELCCK	CFI	2	✓
P_00024	ACGACPLWGK	C7	1	✓
P_00025	ACIPTGPYPCGK	F10	2	✓
P_00026	ACPLDQAIGLLVAIFHK	S100A6	1	✓
P_00027	ACVGDVQER	THBS2	2	✓
P_00028	ADAGTAVTFQCR	CILP2	1	✓
P_00029	ADAVTLDGGFIYEAGLAPYK	LTF	1	✓
P_00030	ADDTAVYYCAR	IGHG1	1	✓
P_00031	ADEGISFR	PRDX1	1	✓
P_00032	ADGELNVDSLITR	PPP1CB	1
P_00033	ADHGEPIGR	HSP90AB1	2
P_00034	ADLGALELWR	SORT1	2	✓
P_00035	ADLTGISPSPNLYLSK	SERPINB12	2	✓
P_00036	ADQLIQTLHAVDK	CDH6
P_00037	ADSQAQLLLSTVVGVFTAPGLHLK	AGT	1	✓
P_00038	ADTDGGLIFR	MFI2	1	✓
P_00039	AEAEEDGDLQCLCVK	PF4V1	2
P_00040	AEEQPQVELFVK	CLIC1	1
P_00041	AEEVELYLEK	TMEM87A	2	✓
P_00042	AEEYEFLTPVEEAPK	ARHGDIA	1	✓
P_00043	AEHQQDSEDLFK	SUN2	2	✓
P_00044	AEIENYVLTYK	TNR	2	✓
P_00045	AELNEFLTR	RPS3	1	✓
P_00046	AENFFILR	ARPC4	1	✓
P_00047	AEVDDVIQVR	F5	1	✓
P_00048	AFALWSAVTPLTFTR	MMP9	1	✓
P_00049	AFASVSDLIDIGK	ZNF781
P_00050	AFGFSHLEALLDDSK	OTUB1	2	✓
P_00051	AFGHHAVSLLDGGLR	MPST	1	✓
P_00052	AFIDPLGLPDRPFYR	FOLH1	2
P_00053	AFLASPEYVNLPINGNGK	GSTP1	1
P_00054	AFLLTPR	APOM	2	✓
P_00055	AFNTISAWALQSGALDASR	STEAP4	1	✓
P_00056	AFPALTSLDLSDNPGLGER	CD14	1	✓
P_00057	AFQNVFAPR	GNS	1	✓
P_00058	AFQVWSDVTPLR	MMP2	2	✓
P_00059	AFTVPITDVTENALK	LRRC4B
P_00060	AFYAELYHIISSNLEK	PSME2	2	✓
P_00061	AFYVNVLNEEQR	CAT	1	✓
P_00062	AGAAAGGPGVSGVCVCK	IGFBP7	1	✓
P_00063	AGALNSNDAFVLK	GSN	1	✓
P_00064	AGAVNPTVK	DPP4	1	✓
P_00065	AGCAVTSLLASELTK	DIAPH1	1	✓
P_00066	AGEQDATIHLK	NCAM1	2	✓
P_00067	AGEVQEPELR	AZGP1	1
P_00068	AGFVCPTPPYK	LPO	1	✓
P_00069	AGHYAASIIIR	ADK	2	✓
P_00070	AGIAHLYGIAGSTNVTGDQVK	FBP1	1	✓
P_00071	AGLLRPDYALLGHR	PGLYRP2	1	✓
P_00072	AGLQVYNK	CD59	1	✓
P_00073	AGLSVLLK	PIGT	2	✓
P_00074	AGPNGTLFVADAYK	APMAP	2	✓
P_00075	AGQLLSELFTNR	CES1	2	✓
P_00076	AGSGSQVPTEPK	SDC4	1	✓
P_00077	AGVETTTPSK	IGLC2	1
P_00078	AGVFSDLSNQELK	AOC1	1	✓
P_00079	AGVLAGHDNR	GNB1	1
P_00080	AGWLATEAQVTQELK	TUT1	2	✓
P_00081	AGYIIPLQGPGLTTTESR	GAA	1	✓
P_00082	AHFSISNSAEDPFIAIHAESK	AMY1A	1
P_00083	AHGQDLGTAGSCLR	COL4A1	1
P_00084	AHPVFYQGTYSQALNDAK	FAF2	2
P_00085	AIANECQANFISIK	VCP	1	✓
P_00086	AIDGINQR	CAMP	2	✓
P_00087	AIDLFTDAIK	ST13	1
P_00088	AIENELLAR	GSS	1	✓
P_00089	AIENIDTLTNLESLFLGK	PPP1R7	1	✓
P_00090	AIGLPEELIQK	FABP1	1
P_00091	AIHLDLEEYR	CNDP1	2	✓
P_00092	AILNYIASK	GSTA2	1
P_00093	AILPCQDTPSVK	LTA4H	2	✓
P_00094	AISSIGLECQSVTSR	RETN	1	✓
P_00095	AITTSLTTK	UGGT1	2	✓
P_00096	AIVAIENPADVSVISSR	RPSA	1	✓
P_00097	AKPSAPVVSGPAVR	SIRPB1	1	✓
P_00098	AKPVTQIVSAEAWGR	TRBC1	2
P_00099	ALAAKPGLDTYSLGGGGAAR	NAGLU	1	✓
P_00100	ALADVATVLGR	NCSTN	2	✓
P_00101	ALANSLACQGK	ALDOA	1	✓
P_00102	ALASECAQHLSLPLR	PGLYRP1	1	✓
P_00103	ALASQLQDSLK	VCL	1
P_00104	ALDAAYCFR	TGFB2
P_00105	ALDFAVGEYNK	CST3	1	✓
P_00106	ALDLLDR	MAPK3	1	✓
P_00107	ALDVMVSTFHK	S100A4	1
P_00108	ALDVNVALR	RBP1	2	✓
P_00109	ALEAFETFK	SORD	2	✓
P_00110	ALEESNYELEGK	KRT10	2	✓
P_00111	ALEFLQLHNGR	GPLD1	2	✓
P_00112	ALEHFTDLYDIK	CLTC	1
P_00113	ALFEEVPELLTEAEK	ATIC	2	✓
P_00114	ALHFVISEYNK	CST2	1	✓
P_00115	ALLNVVDNAR	PLD3	1	✓
P_00116	ALLQDKDVIAINQDPLGK	GLA	2	✓
P_00117	ALLSYDGLNQR	EPDR1	2	✓
P_00118	ALLTPVAIAAGR	GSR	1	✓
P_00119	ALNCHLPAIIFVTK	CCL16	2	✓
P_00120	ALNEACESVIQTACK	GLG1	1	✓
P_00121	ALNPQDYVATVADALK	SLC12A9	2	✓
P_00122	ALNSIIDVYHK	S100A8	1	✓
P_00123	ALPAVQQNNLDEDLIR	UBA1	1	✓
P_00124	ALPFWNEEIVPQIK	PGAM1	1
P_00125	ALQAAYGASAPSVTSAALR	AKR7A2	1	✓
P_00126	ALQASALNAWR	ALDOC	2
P_00127	ALQATVGNSYK	LAMP1	1	✓
P_00128	ALQDQLVLVAAK	AGT	1	✓
P_00129	ALQGASQIIAEIR	DNM1L	2	✓
P_00130	ALQPIVSEEEWAHTK	CRAT	2	✓
P_00131	ALQSVGQIVGEVLK	PSMC6	1	✓
P_00132	ALSEALTELGYK	SHMT1	1	✓
P_00133	ALSIGFETCR	CD44	1	✓
P_00134	ALSNVEGFER	ITGA2	2	✓
P_00135	ALTFELTLR	CSF1R	2	✓
P_00136	ALTGHLEEVVLALLK	ANXA1	1	✓
P_00137	ALTLIAGSPLK	CAND1	1	✓
P_00138	ALTSELANAR	MSN	2
P_00139	ALTVPELTQQVFDAK	TUBB	1	✓
P_00140	ANAQAAALYK	CAPG	2	✓
P_00141	ANATEFGLASGVFTR	ALDH1L1	2	✓
P_00142	ANDTSYIR	OGN	2	✓
P_00143	ANGIVVPSTIFDPSELQDLSSK	SLC22A5
P_00144	ANHSGAVVLLK	ITGA6	2	✓
P_00145	ANNSWFQSILR	NCSTN	2	✓
P_00146	ANNTFYGLSAGVFTK	ALDH1A1	1
P_00147	ANSTDYGLTAAVFTK	ALDH1A3	1	✓
P_00148	APDFVFYAPR	EZR	1
P_00149	APDLQDLPWQVK	PROZ	1	✓
P_00150	APDPGFQER	DPP7	2	✓
P_00151	APEPLELTLPVELLADTR	BPIFB2	2	✓
P_00152	APGAIGPYSQAVLVDR	HRSP12	1	✓
P_00153	APGEGPQVACTGPPSAPR	EPHA1	2	✓
P_00154	APLDIPVPDPVK	PSME1	2	✓
P_00155	APLEAVAAK	SCGB1D1	1	✓
P_00156	APRPAPGGAEQR	ENDOD1	1	✓
P_00157	APTAQVESFR	TNC	1	✓
P_00158	APVILGSPDDVLEFLK	FBP1	1	✓
P_00159	APWVEQEGPEYWDR	HLA-C	2
P_00160	AQEENTWFSYLK	CANT1	1	✓
P_00161	AQIINDAFNLASAHK	ANPEP	1	✓
P_00162	AQIWDTAGQER	RAB11B	1
P_00163	AQLDPAFIK	MPST	1
P_00164	AQLVEEWANSVK	SERPINI1	1	✓
P_00165	AQNDQLGWLWGQSR	HYAL1	1	✓
P_00166	AQPVQVAEGSEPDGFWEALGGK	GSN	1	✓
P_00167	AQQEQELAADAFK	PRKCSH	2	✓
P_00168	AQQVSQGLDVLTAK	VCL	1	✓
P_00169	AQVANLSSLLSELNK	ANGPTL7	2	✓
P_00170	AQWANPFDPSK	SERPINA7	2	✓
P_00171	ASAAFSSVGSVITK	TPD52	2	✓
P_00172	ASASATVAVNPGPDTK	CRYBB1	2	✓
P_00173	ASCLYGQLPK	GSTP1	1	✓
P_00174	ASEQIYYENR	ANTXR1	2	✓
P_00175	ASHEEVEGLVEK	LGALS3BP	1	✓
P_00176	ASHTAPQVLFSHR	ARPC2	2	✓
P_00177	ASIPFSVVGSNQLIEAK	SEPT2	1	✓
P_00178	ASLINNAFQLVSIGK	ERAP1	1	✓
P_00179	ASLPYSQISGLNALQLR	PIGS	2	✓
P_00180	ASSEGGTAAGAGLDSLHK	ARPC1B	2	✓
P_00181	ASVSVTAEDEGTQR	ICAM1	2	✓
P_00182	ASVVQVGFPCLGK	WIF1	2	✓
P_00183	ATAVVDGAFK	PRDX2	1	✓
P_00184	ATDFVVPGPGK	IDH1	1	✓
P_00185	ATDPAAFPGEAR	C1orf159
P_00186	ATEHLSTLSEK	APOA1	1	✓
P_00187	ATENDIYNFFSPLNPVR	HNRNPF	1
P_00188	ATGDPYYLEVGK	EDEM3	2	✓
P_00189	ATILISHSR	PAPPA2	2	✓
P_00190	ATLAPSETPFVPQK	ABI3BP
P_00191	ATLDVVAGEAAGLSCR	CD1D	2	✓
P_00192	ATNYNAGDR	LYZ	1	✓
P_00193	ATPQHTVSFTCESHGFSPR	SIRPA	1
P_00194	ATVFLAMGK	DNAJC3	2
P_00195	ATYHGSFSTK	COL6A3	2	✓
P_00196	AVAEPGIQLK	THBS4	2
P_00197	AVATVGPISVAIDAGHESFLFYK	CTSL	2	✓
P_00198	AVDPSSVALVTLGSSK	NUP210	2	✓
P_00199	AVEHINK	ENO1	1
P_00200	AVEPQLQEEER	PLTP	1	✓
P_00201	AVFLTEALER	SPINK5	2	✓
P_00202	AVFQANQENLPILK	ATP1A1	2	✓
P_00203	AVGFGGDFDGVPR	DPEP1	1	✓
P_00204	AVGLAGTFR	COL18A1	2	✓
P_00205	AVGLLTVISK	PSCA	1	✓
P_00206	AVLEALGSCLNNK	SHMT1	1	✓
P_00207	AVLENNLGAAVLR	MAT2B	1	✓
P_00208	AVLVNNITTGER	GOLM1	2	✓
P_00209	AVPWVILSDGDGTVEK	CANT1	1	✓
P_00210	AVQQPDGLAVLGIFLK	CA2	2	✓
P_00211	AVTELNEPLSNEDR	YWHAH	2	✓
P_00212	AVTEQGAELSNEER	YWHAQ	2	✓
P_00213	AVVFLEPQWYSVLEK	FCGR3B	2	✓
P_00214	AVVVHAGEDDLGR	SOD3	1	✓
P_00215	AWFLESK	APOC4	2	✓
P_00216	AYDADSSDIDK	FAT1	2	✓
P_00217	AYGLLVATTSR	NRXN3
P_00218	AYIFSIDEK	ITGA4	2	✓
P_00219	AYLDELVELHR	MLLT3	2	✓
P_00220	AYSLFSYNTQGR	APCS	1	✓
P_00221	AYSSFGGGR	EIF4H	2	✓
P_00222	AYVAVDGIPQGVLER	GLB1	1	✓
P_00223	CALGVFR	PSMD2	2	✓
P_00224	CAYGYYQDETTGR	NGFR	1	✓
P_00225	CCHGDYSFR	C1QTNF3
P_00226	CDENILWLDYK	PKM	1	✓
P_00227	CDSDILPLR	LRRC15	2	✓
P_00228	CDSHGTHLAGVVSGR	PCSK9	2	✓
P_00229	CEEPYLR	FBLN5	2	✓
P_00230	CFEGFGIDGPAIAK	CFH	2	✓
P_00231	CFLGCELPPEGSR	PROCR	1	✓
P_00232	CFSLVESTYK	GNPTG	1	✓
P_00233	CIEGTCVCK	CFI	2	✓
P_00234	CIESLIAVFQK	S100A11	1	✓
P_00235	CIHNTAGIYCDQCK	LAMC2	2	✓
P_00236	CINQLLCK	SEPP1	2	✓
P_00237	CLAEGAGDVAFVK	MFI2	2	✓
P_00238	CLAYDFYPGK	AZGP1	1
P_00239	CLDPVDTPNPTR	SLPI	1	✓
P_00240	CLSLDAK	OLR1
P_00241	CLTPPESIPK	GALNS
P_00242	CNSLSTLEK	LAMP2	1	✓
P_00243	CPAGFIDK	DLK1	1	✓
P_00244	CPFPSRPDNGFVNYPAKPTLYYK	APOH	2	✓
P_00245	CPGESSHICDFIR	PPT1	2	✓
P_00246	CPLGVPLVLDGCGCCR	WISP2	2	✓
P_00247	CPLLVDSEGWVK	PIGR	1	✓
P_00248	CPNPPVQENFDVNK	APOD	1	✓
P_00249	CQGPPGVDLYR	GP6	1	✓
P_00250	CQLQVQGEPPEVHWLR	AXL	1	✓
P_00251	CSGIASAAAAAVEAAR	QPRT	2	✓
P_00252	CTSQAIYTEHFGK	C14orf39
P_00253	CVCPPGHSGAK	JAG1
P_00254	CVDIDECTQVQHLCSQGR	LTBP1	2	✓
P_00255	CVDTMAYEK	SCGB1D1	1
P_00256	CVWEIEVNSGYR	DMBT1	1	✓
P_00257	CYNELNGCTK	SPINK1	2	✓
P_00258	DAAAPSQPLR	CDHR5	1	✓
P_00259	DAALFDEFVR	CCDC37
P_00260	DADLTDTAQTR	TSTA3	2	✓
P_00261	DAEDVDLNHYR	PPP1R7	2	✓
P_00262	DAEGILEDLQSYR	FAM49B	1	✓
P_00263	DAGPLLISLK	CORO1A	1	✓
P_00264	DAGTIAGLNVLR	HSPA8	1	✓
P_00265	DALSSVQESQVAQQAR	APOC3	2	✓
P_00266	DAPVPFAGEICAFK	CLSTN2
P_00267	DAQASAAPAAPLPER	SLC29A1	2	✓
P_00268	DAQEVHCDEATK	BTD	2	✓
P_00269	DASGVTFTWTPSSGK	IGHA1	1	✓
P_00270	DAVEDLESVGK	DCD	1	✓
P_00271	DAVLLVFANK	ARF1	1
P_00272	DAVTYTEHAK	HIST1H4C	2
P_00273	DCENYITLLER	SEMA7A	2	✓
P_00274	DCQELFQVGER	ANGPTL4	2	✓
P_00275	DCQNYIK	SEMA4B
P_00276	DCQPGLCCAFQR	DKK3	2	✓
P_00277	DCSSIPGAAGTCK	EPHA10	2	✓
P_00278	DDAQLSGLPSALR	TMEM30B	2	✓
P_00279	DDFNSGFR	EIF4H	2	✓
P_00280	DDGLFSGDPNWFPK	TAGLN2	2	✓
P_00281	DDKESVPISDTIIPAVPPPTDLR	FN1	1
P_00282	DDNEECGDICPGTAK	INSR	2	✓
P_00283	DDSECITR	LEAP2	1	✓
P_00284	DECWCPANSTGK	LTBP2	2	✓
P_00285	DEELIHLDGK	FRAS1	2	✓
P_00286	DEELSCTVVELK	SERPINA3	1	✓
P_00287	DEIPHNDIALLK	HABP2	2	✓
P_00288	DFAEHLLIPR	PROZ	1	✓
P_00289	DFALQNPSAVPR	IGFALS	1	✓
P_00290	DFEQPLAISR	PDLIM1	2	✓
P_00291	DFFLANASR	CAPN1	2	✓
P_00292	DFFTPNLFLK	UPK1B	1	✓
P_00293	DFHINLFR	C2	2	✓
P_00294	DFLPLVAK	DPYD	2	✓
P_00295	DFTCVHQALK	SERPING1	1	✓
P_00296	DFTPVCTTELGR	PRDX6	1
P_00297	DFYVDENTTVR	SERPINA4	2	✓
P_00298	DGAGDVAFVK	TF	1	✓
P_00299	DGDLVDWWTQQSASNFK	MME	2	✓
P_00300	DGEATLEVDGTR	GAS6	2	✓
P_00301	DGGLICTSCR	CORO1A	1	✓
P_00302	DGLAFNALIHR	ACTN4	1
P_00303	DGLCVPR	APOM	2	✓
P_00304	DGLILTSR	PARK7	1	✓
P_00305	DGNGYISAAELR	CALM3	2	✓
P_00306	DGNSSLIAAVAEVR	JAG1	2	✓
P_00307	DGPNYQWVPYQGR	SEMA3A
P_00308	DGSAQSGVDYYPK	FRAS1	2	✓
P_00309	DGSAVEIVGLSK	AGL	1	✓
P_00310	DGTHVVENVDATHIGK	F13A1	2	✓
P_00311	DGVDSDAPILSK	CUBN	1	✓
P_00312	DGVTGPGFTLSGSCCQGSR	LYPD3	2	✓
P_00313	DGVVFGVEK	PSMA3	2	✓
P_00314	DGWQLQVQGGVAQLVIK	SECTM1	1	✓
P_00315	DGYNYTLSK	S100A11	1	✓
P_00316	DHDTFLAVR	LMAN2	1	✓
P_00317	DHDVYTGNCAHYQK	ANGPTL2	1	✓
P_00318	DHEELSLVASEAVR	CPB2	2	✓
P_00319	DHGIPPYHDYR	PXDN	2	✓
P_00320	DHLISVTPDSIR	ITIH5	2	✓
P_00321	DHPPIPITDLADNIER	PTPRF	2	✓
P_00322	DIDECDIVPDACK	EFEMP1	1	✓
P_00323	DIEHLTSLDFFR	ENPP2	2	✓
P_00324	DILAQSPAAEPLK	LAMB1	2	✓
P_00325	DINTFIHGNK	ANG	2	✓
P_00326	DIQAAGGIVTAEDLNNYR	GGT1	1
P_00327	DIQDSLTVSNEVQTAK	CAPZA2	2	✓
P_00328	DIQGSLQDIFK	CDH13	1	✓
P_00329	DISTNYYASQK	HSP90B1	2	✓
P_00330	DKPLKDVIIADCGK	PPIB	2	✓
P_00331	DLAQALLNAEK	AXDND1
P_00332	DLDGNGYPDLIVGSFGVDK	ITGA5	2	✓
P_00333	DLEAEIHPLK	ITFG3
P_00334	DLECVTNLQEVAR	CTSA	1	✓
P_00335	DLEDFFSAVGK	RBM23	2	✓
P_00336	DLELLIQTATR	NUCB1	1	✓
P_00337	DLEVVEGSAAR	MYLK	1	✓
P_00338	DLGAIVYCVGVK	ANTXR1	2	✓
P_00339	DLGDEYGWK	TM9SF3	2	✓
P_00340	DLGGFDEDAEPR	SDF4	2	✓
P_00341	DLGPTLANSTHHNVR	GBA	2	✓
P_00342	DLGTESQIFISR	GDI2	1	✓
P_00343	DLHLSDVFLK	C6	2	✓
P_00344	DLISAGLK	AHSP	2	✓
P_00345	DLLHVLAFSK	LEP	2	✓
P_00346	DLQFVEVTDVK	FN1	1	✓
P_00347	DLQHPNEFIR	COPB1	2	✓
P_00348	DLVGELGTALR	FUCA1	1
P_00349	DLVSGLFSFSSCPFSR	ENTPD2	2	✓
P_00350	DLWTAPEHLR	GUCY2C	2	✓
P_00351	DLYLENPEIK	TGM2	1	✓
P_00352	DLYSGLIGPLIVCR	CP	2	✓
P_00353	DNEETGFGSGTR	ANPEP	1	✓
P_00354	DNELLVYK	APCS	2	✓
P_00355	DNENVVNEYSSELEK	FGB	2	✓
P_00356	DNFHGLAIFLDTYPNDETTER	LMAN2	1	✓
P_00357	DNLQLPLQFLSR	NPC1	2	✓
P_00358	DNSLELSQLENK	ANGPTL1	1	✓
P_00359	DNTINLIHTFR	ARPC2	1	✓
P_00360	DPAFTALLTTQTQVQR	CRISP3	2	✓
P_00361	DPDAANSPIR	CDH11	2	✓
P_00362	DPNGLPPEAQK	RBP4	1
P_00363	DPTAEQFQEELEK	CASP14	2	✓
P_00364	DPVSGFCLK	HMCN1	1	✓
P_00365	DQAGEYECSAENDVSFPDVR	NEGR1	1	✓
P_00366	DQGTYEDYVEGLR	MYL6	2	✓
P_00367	DQLVIPDGQEEEQEAAGEGR	GOLM1	1	✓
P_00368	DQPPNSVEGLLNALR	FAM49B	2	✓
P_00369	DQSGEYECSALNDVAAPDVR	OPCML	1	✓
P_00370	DQTVVGPALAAYR	CTGF	2	✓
P_00371	DQVANSAFVER	HSP90AA1	2	✓
P_00372	DSCTLPASAEK	C7	1	✓
P_00373	DSGPYSCSVNVQDK	ESAM	1	✓
P_00374	DSHLTAVGK	DNASE1	1	✓
P_00375	DSIVAELDR	COPE	2	✓
P_00376	DSPSVWAAVPGK	PFN1	1
P_00377	DSSDFGAPHPQVQSVR	CRYBB2	2	✓
P_00378	DSTGHVGFIFK	SDCBP	1	✓
P_00379	DSTIQVVENGESSQGR	UMOD	1	✓
P_00380	DSVSSVSDISQYR	EPS8	2
P_00381	DTDSSVASEVR	LSR	2	✓
P_00382	DTFNHLTTWLEDAR	RAB2A	2	✓
P_00383	DTGAFDAVGEVEAWHR	WISP1
P_00384	DTNGSQFFITTVK	PPIB	1	✓
P_00385	DTPVELLAPLPPYFSR	RPUSD3	2	✓
P_00386	DVDEIEAWISEK	SPTAN1	1	✓
P_00387	DVHSLSEYFSLLTR	LFNG
P_00388	DVNAAIAAIK	TUBA4A	1	✓
P_00389	DVNDNPPTLDVASLR	CDHR2	1	✓
P_00390	DVQDSLTVSNEAQTAK	CAPZA1	2	✓
P_00391	DVSQSSIYSQTEEK	SEMG1	2	✓
P_00392	DVTADFEGQSPK	DPP7	2	✓
P_00393	DVTALNVSTLK	MUC4	2	✓
P_00394	DVTFNIICK	EPHA3
P_00395	DVTVLQNTDGNNNEAWAK	LTF	1	✓
P_00396	DVWGIEGPIDAAFTR	VTN	1	✓
P_00397	DWFGALHEDANR	SPOCK1	2	✓
P_00398	DWFQLLHENSK	SPOCK2
P_00399	DWGPALLEHR	SLC6A9
P_00400	DYFGAHTYELLAK	PGD	1	✓
P_00401	DYLLCDYNR	CAPZB	1	✓
P_00402	DYSADTLAHHNDIALLK	PLAU	1	✓
P_00403	DYSHYYTTIQDLR	KRT19	2	✓
P_00404	DYSQPTAAATVQDIK	LAMP3
P_00405	DYTGCSTSESLSPVK	MPZL1	2
P_00406	DYTGEDVTPQNFLAVLR	LGMN	2	✓
P_00407	DYVSQFEGSALGK	APOA1	1	✓
P_00408	DYYPINESLASLPLR	CLPTM1	2	✓
P_00409	EAATQAQQTLGSTIDK	QARS	2	✓
P_00410	EACDDYR	MGP
P_00411	EACNAWLQK	C1RL	1	✓
P_00412	EAEPLVDIR	MMRN2	1	✓
P_00413	EAFQLFDR	MYL6	1	✓
P_00414	EAGNPGSLFGYSVALHR	ITGA3	2	✓
P_00415	EAGTLAYYEICDFLR	CHI3L1	2	✓
P_00416	EAIDPALEGR	CDHR2	2	✓
P_00417	EALAIVFFGR	AOC3	2	✓
P_00418	EALGCHIEQATK	TUT1	2	✓
P_00419	EASGETTGVDITK	ZC3H11A	2	✓
P_00420	EASSCAVNLVLR	STK39	2	✓
P_00421	EATLQDCPSGPWGK	CD5L	2	✓
P_00422	EAVIAQISSHVK	ADAM10	2	✓
P_00423	EAVILPIK	VPS4B	1
P_00424	ECRPGGSCAPCGGDLTFDPGPR	EPHB4	2	✓
P_00425	EDARPVPQGSCQSELHR	IGFBP4	2	✓
P_00426	EDGGGWWYNR	FGB	2	✓
P_00427	EDPQTFYYAVAVVK	TF	1	✓
P_00428	EDPTVSALLTSEK	GSTO1	2	✓
P_00429	EDQTSPAPGLR	PIK3IP1	1	✓
P_00430	EEASDYLELDTIK	HSP90B1	1	✓
P_00431	EELGARPDATK	ITGAL	2	✓
P_00432	EENFYVDETTVVK	SERPINA6	2	✓
P_00433	EESLDSDLYAELR	PPBP	2	✓
P_00434	EFADSLGIPFLETSAK	RAB1A	1
P_00435	EFEEDLTGIDDR	RBP1	2	✓
P_00436	EFGNTLEDK	APOC1	2	✓
P_00437	EFTPPVQAAYQK	HBB	2	✓
P_00438	EGEEAGPGDPLLEAVPK	CDC37	1	✓
P_00439	EGETIIELK	CD47	2	✓
P_00440	EGHLSPDIVAEQK	NQO1	2	✓
P_00441	EGNFNVYLSDLIPVDR	GALNT5	1	✓
P_00442	EGTSLGEVGGPDLK	NID2	2	✓
P_00443	EGVIIEILASR	ANXA8	1
P_00444	EGVLGLVHEFK	VTCN1
P_00445	EGVVHGVATVAEK	SNCA	2	✓
P_00446	EHGSQFFYLPIIK	KIF13A	2	✓
P_00447	EIIDPVLDR	TUBA4A	1	✓
P_00448	EILISSSVDIHLK	BEND2
P_00449	EISLWFKPEELVDYK	NME2	2	✓
P_00450	EIVLADVIDNDSWR	PAICS	1	✓
P_00451	EIYCPAPPQIDNGIIQGER	CD55	1	✓
P_00452	ELAEDGYSGVEVR	RPS3	1	✓
P_00453	ELDLNSVLLK	RNASET2	1	✓
P_00454	ELFSPLHALNFGIGGDTTR	PAFAH1B2	1
P_00455	ELGATECINPQDYK	ADH1C	1
P_00456	ELGDHVTNLR	FTH1	2	✓
P_00457	ELGICPDDAAVIPIK	PIP	1	✓
P_00458	ELGVGIALR	FABP5	2	✓
P_00459	ELIQTSALNFLTPLR	SH3GLB1	1
P_00460	ELLENEFHQILK	HRNR
P_00461	ELLLQPVTISR	ARPC4	1	✓
P_00462	ELPGFLQSGK	S100P	2	✓
P_00463	ELPSFLGK	S100A4	1	✓
P_00464	ELPVNAQNYVR	ADSS	1	✓
P_00465	ELQNLIQELQQAR	CALB1	1	✓
P_00466	ELSEIAQSIVANGK	ALDOB	1	✓
P_00467	ELSELSLLSLYGIHK	ACPP	1	✓
P_00468	ELSLAGNELGDEGAR	RNH1	1	✓
P_00469	ELSTTLNADEAVTR	HSPA4	1	✓
P_00470	ELTVSNNDINEAGVR	RNH1	1	✓
P_00471	ENAGEDPGLAR	DCD	1	✓
P_00472	ENELTYYCCK	CD59	1	✓
P_00473	ENFPNFLSACDK	S100A7	2
P_00474	ENGLHSVHVR	LRRC26
P_00475	ENISDPTSPLR	IGJ	2	✓
P_00476	ENKPSIIFIDEIDSLCGSR	VPS4B	1	✓
P_00477	ENTQQHITAR	CTSG	2	✓
P_00478	ENYNQYDLNR	CPM	1	✓
P_00479	EPCVESLVSQYFQTVTDYGK	APOA2	1	✓
P_00480	EPQVYTLPPSR	IGHM	1	✓
P_00481	EQAVEGGEVELSCLVPR	CADM4	1	✓
P_00482	EQGYDVIAYLANIGQK	ASS1	1	✓
P_00483	EQHLYYQDQLLPVSR	TPSAB1	2
P_00484	EQLGEFYEALDCLR	ORM1	1	✓
P_00485	EQLTPLIK	APOA2	2	✓
P_00486	EQQALNESSAK	TP73
P_00487	EQTFGGVNYFFDVEVGR	CST4	1	✓
P_00488	EQYAVVGHSAHIVTLK	ATRN	1	✓
P_00489	ESDTSYVSLK	CRP	2	✓
P_00490	ESEYHYEYTACDSTGSR	KIAA1324	2	✓
P_00491	ESLSSYWESAK	APOC2	2	✓
P_00492	ESQAYYQR	PRNP	2	✓
P_00493	ESSYGPEIDSHDFVLR	ST3GAL1	2	✓
P_00494	ESTLHLVLR	RPS27A	1
P_00495	ETEVIDPQDLLEGR	SDC4	1	✓
P_00496	ETFFNLSK	SERPINA10	2	✓
P_00497	ETGTPIWTSR	SEZ6L
P_00498	ETIPLQETSLYTQDR	PPT1	1	✓
P_00499	ETNLLYDPK	ENPEP	1	✓
P_00500	EVAFDLEIPK	ITIH1	1	✓
P_00501	EVHSGVSTDPQPLK	TRBC1	2
P_00502	EVIELPLTNPELFQR	PSMC6	1	✓
P_00503	EVIFSVEDGSVK	EML2	2	✓
P_00504	EVIGTGYGILDQK	CNPY3	2	✓
P_00505	EVTVLLEHQK	DSC3	2	✓
P_00506	EVVDGLEK	COMT	1	✓
P_00507	EVVSLTEACCAEGADPDCYDTR	GC	1	✓
P_00508	EWAMNVGDK	COMT	2
P_00509	EWFLQAAK	GPI	1	✓
P_00510	EWFSETFQK	APOC1	2	✓
P_00511	EYESYSDFER	C8B	2	✓
P_00512	EYLIAGK	TIMP2	2	✓
P_00513	EYQLNDSAAYYLNDLER	GNAI2	2	✓
P_00514	EYVQLISVYEK	OLFM4	2	✓
P_00515	FADDQLIIDFDNFVR	CAPN2	1	✓
P_00516	FAGAGVTTER	CD33	1	✓
P_00517	FAGIDGTSTYTSGDQK	TGFB2	2	✓
P_00518	FANTVGLVVER	HAAO	1	✓
P_00519	FATVNILPEVENDR	RNF19A
P_00520	FAVEEIIQK	LXN	1	✓
P_00521	FAYGYIEDLK	SERPINB1	1	✓
P_00522	FCENPDEVK	F5	2	✓
P_00523	FCETTIGSK	GPD1L	2	✓
P_00524	FDAPPEAVAAK	SCGB1D2
P_00525	FDGGVEAIATR	MAN1A1	1	✓
P_00526	FEAEHISNYTALLLSR	SEMA4B	2	✓
P_00527	FEDENFILK	PPIA	2	✓
P_00528	FEDGGYVVCNTR	LGALS9	1
P_00529	FEDGVLDPDYPR	VTN	1	✓
P_00530	FEDNGIYFCQQK	CD79B
P_00531	FEELNADLFR	HSPA8	2
P_00532	FEGAIYR	GART	2	✓
P_00533	FELALQLGELK	COPB2	2	✓
P_00534	FENQTGFPPPDSR	VCAN	2	✓
P_00535	FESIIHEFDPWFNYR	STT3B	2	✓
P_00536	FEVNNTILHPEIVECR	PEPD	2	✓
P_00537	FFADLLDYIK	HPRT1	2	✓
P_00538	FFGHGAEDSLADQAANEWGR	SAA1	2	✓
P_00539	FFGTFLPEVAK	BPI	1	✓
P_00540	FFNVLTTNTDGK	GGH	1	✓
P_00541	FFPFGLVQLSSDLSK	SIAE	2	✓
P_00542	FFPLESWQIGK	DDT	1	✓
P_00543	FFQDNNSLFQNTVASR	TTLL6
P_00544	FFYAGTPPAGLAADSHVK	ENDOD1	2	✓
P_00545	FGDFVLK	UMPS	2	✓
P_00546	FGDQVLQINGENCAGWSSDK	SDCBP	2	✓
P_00547	FGFLQEFSK	CNTN2	2	✓
P_00548	FGLFKPGEIAPLLFR	OSCAR	1	✓
P_00549	FGQTPVQER	VNN1	2	✓
P_00550	FGSLLPIHPVTSG	PPP2R4	1
P_00551	FGVYDIDNK	CPNE3	1	✓
P_00552	FGWDCHGLPVEYEIDK	IARS	2	✓
P_00553	FGYILHTDNR	MASP1	2	✓
P_00554	FHDFLGDSWGILFSHPR	PRDX6	2	✓
P_00555	FHYLTFVPSAEDFYDCR	HLA-DPA1	2	✓
P_00556	FIASFNVVNTTK	PTPRM	2	✓
P_00557	FIDVPTLCEMLSYTPSSSK	MPI	2
P_00558	FIEAGQFNDNLYGTSIQSVR	DLG3	2	✓
P_00559	FIEDELQIPVK	ADSS	1	✓
P_00560	FIHNENGANYSVTATR	IL1RL1	2	✓
P_00561	FIIPNVVK	LDHA	2
P_00562	FINLFPETK	AP2A1	2	✓
P_00563	FINYNQTVSR	EMC1	2	✓
P_00564	FISVGYVDDTQFVR	HLA-C	2
P_00565	FLDDFESCPALYQR	GGACT	1
P_00566	FLDLVPSLQLDPAQIYR	APOBEC3B	1
P_00567	FLDTGVVQSDR	MEGF8	2
P_00568	FLEQELETITIPDLR	PLTP	1	✓
P_00569	FLGIFNTGLK	TSHR
P_00570	FLGVLYPLSSK	P2RY8	2	✓
P_00571	FLIDGFPR	CMPK1	1	✓
P_00572	FLIPNASQAESK	YWHAZ	1	✓
P_00573	FLIQNVLR	IARS	1	✓
P_00574	FLNVLSPR	IGFBP3	2	✓
P_00575	FLPGQGLVLYPQIGDK	EFNB2	2	✓
P_00576	FLQEQGHR	C8G	2	✓
P_00577	FLQPGSPR	GSTA1	1
P_00578	FLSPVQHLFNIR	ZNF781
P_00579	FLVGPDGIPIMR	GPX3	1
P_00580	FLVGPDGVPLR	GPX1	2	✓
P_00581	FLVNLVK	AFM	2	✓
P_00582	FLVSLALR	APOF	2	✓
P_00583	FNAHGDANTIVCNSK	LGALS1	2	✓
P_00584	FNISNGGPAPEAITDK	PGM1	2
P_00585	FPGQLNADLR	TUBB4B	1
P_00586	FPSVSLQEASSFFR	PRR4	1
P_00587	FQDSSQWLQIDLK	RS1	2	✓
P_00588	FQEFSPNLWGLEFQK	EFNB2	2	✓
P_00589	FQEYILALADVPSSPYGVK	NCAM2	2	✓
P_00590	FQGEWNLQPLPK	DBH	2	✓
P_00591	FQGTSYDSCTTEGR	MMP2	2	✓
P_00592	FQPTLLTLPR	SERPING1	1	✓
P_00593	FQPVGTVEFHDLVTFTR	IGSF3	2	✓
P_00594	FQSHIIIR	OLFM1	2	✓
P_00595	FRPDGLPK	SAA4	2	✓
P_00596	FSAVALCK	UCHL1	2	✓
P_00597	FSGSNSGNTATLTISR	IGLC2	1	✓
P_00598	FSIAILGSYNR	ITGA1	2	✓
P_00599	FSLDALITNILPFEK	ADH1C	1	✓
P_00600	FSPYEWHTEEPEDGK	GRIA4
P_00601	FSQAVILSQLFPLESIR	PROL1	1	✓
P_00602	FSQFLETEYK	PYGL	1	✓
P_00603	FSSQELILR	TGM3	2	✓
P_00604	FSVLLLHGIR	ABHD14B	1	✓
P_00605	FSVVYAK	AHSG	1	✓
P_00606	FTDSENVCQER	AFM	2	✓
P_00607	FTGSLQQLTVHPDPR	COL15A1	1	✓
P_00608	FTGSSWIK	NELL2
P_00609	FTITPPTAQVVGVLK	CAPZA1	1	✓
P_00610	FTITPSTTQVVGILK	CAPZA2	1	✓
P_00611	FTPFTLGK	EFNA1	2	✓
P_00612	FTPPVVNVTWLR	HLA-DRA	2	✓
P_00613	FTQISPVWLQLK	CHID1	1	✓
P_00614	FVAESAEVLLPR	MSLN	1
P_00615	FVFGTTPEDILR	THBS1	1	✓
P_00616	FVGGAENTAHPR	IGFBP5	2	✓
P_00617	FVGYPGDPVYWLGK	ANO6	2	✓
P_00618	FVNSTGYLTEAEK	SUMF1	2	✓
P_00619	FVSISDLLVPK	GDI2	1
P_00620	FVTAVGTQGAISK	NRP1	2	✓
P_00621	FVTHVSDWGALATISTLEAVR	CREG1	2	✓
P_00622	FVYLELPAAAK	RELN
P_00623	FYALSASFEPFSNK	CALR	1	✓
P_00624	FYAYNPLAGGLLTGK	AKR7A2	1
P_00625	FYLFGLTR	CD1C	2	✓
P_00626	FYLYPDITR	SLC6A6	2	✓
P_00627	FYNQVSTPLLR	ITIH2	1	✓
P_00628	FYPEDVAEELIQDITQK	EZR	1	✓
P_00629	FYPEDVSEELIQDITQR	MSN	2	✓
P_00630	FYSLLDPSYAK	STT3A	2	✓
P_00631	FYTFLK	GPX3
P_00632	GACPVFECGNVVLR	HAVCR2	1	✓
P_00633	GADVWFK	S100A8	1	✓
P_00634	GAEIVADTFR	DDAH2	1	✓
P_00635	GAGAFGYFEVTHDITK	CAT	2	✓
P_00636	GAGTDDHTLIR	ANXA5	1	✓
P_00637	GAGTDDSTLVR	ANXA7	1	✓
P_00638	GAGTDEGCLIEILASR	ANXA4	1	✓
P_00639	GAGTGGLGLTVEGPCEAK	FLNB	1
P_00640	GAGTNEDALIEILTTR	ANXA3	1	✓
P_00641	GALCLLAEDDSSCEVNGR	WISP2	2	✓
P_00642	GALGGLDFLSVK	CD1B	2	✓
P_00643	GALQNIIPASTGAAK	GAPDH	1
P_00644	GALQYLVPILTQTLTK	KPNB1	1	✓
P_00645	GAPALLTCVNR	MXRA8	1	✓
P_00646	GATLALTQVTPQDER	MCAM	2	✓
P_00647	GATTSPGVYELSSR	FCGBP	2	✓
P_00648	GATTTFSAVER	DPT	1	✓
P_00649	GAVSQTYPSGTCAYIQR	OLR1	1	✓
P_00650	GCPDVQASLPDAK	PGLYRP2	1	✓
P_00651	GCSFLPDPYQK	PSAP	1	✓
P_00652	GDAGENTALLEAGR	RNF149	2	✓
P_00653	GDELADSALEIFK	TGFBI	2	✓
P_00654	GDFWLGNEHIHR	ANGPTL7	2	✓
P_00655	GDGPVQGIINFEQK	SOD1	2	✓
P_00656	GDHVWDGNSFDSK	PAM	2	✓
P_00657	GDLATCPR	RETN	1	✓
P_00658	GDPSVISVNGTDFTFR	TMEM2	2
P_00659	GDSPWQVVLLDSK	PROC	2	✓
P_00660	GDVTAQIALQPALK	SOD2	1	✓
P_00661	GDVVNQDDLYQALASGK	GRHPR	1	✓
P_00662	GDYDAFFEAR	SH3BGRL	2	✓
P_00663	GEASNPDFGK	SLCO4A1	2	✓
P_00664	GEFVTTVQQR	MDH1	1	✓
P_00665	GEGEPCGGGGAGR	IGFBP7	1	✓
P_00666	GEIIGVK	PPA1	1	✓
P_00667	GELDCHQLADSFR	IGFBP4	2
P_00668	GELLEAIK	SOD2	2
P_00669	GENQSPVELHTK	CA3	2
P_00670	GEPGEGAYVYR	ADIPOQ	2	✓
P_00671	GEPSNEPSTETNK	SLC39A10
P_00672	GEQFVFEK	CRYBB2	2	✓
P_00673	GEQGEPGAPGIR	C1QA
P_00674	GEQGPPGIPGPQGLPGVK	COL9A2
P_00675	GEQPLLLTNAELK	SLC22A23
P_00676	GESLFHSK	EPCAM	2	✓
P_00677	GEWPWQVTLHTTSPTQR	F11	2	✓
P_00678	GFDVSSILDLQLSHNQLTK	KERA
P_00679	GFEPGVTNILK	POSTN	2
P_00680	GFEPTLEALFGK	APOB	1	✓
P_00681	GFGFVLFK	HNRNPD	1
P_00682	GFGFVTFDDHDPVDK	HNRNPA2B1	2
P_00683	GFGGLTGQIVAALSTAK	PRG4	2	✓
P_00684	GFLAYYQAVDLDECASR	C1R	2	✓
P_00685	GFPLPTPAR	BPI	2	✓
P_00686	GFQALGDAADIR	TIMP1	1	✓
P_00687	GFQQLLQELNQPR	SERPINA5	1	✓
P_00688	GFSGIFEDR	PDGFRB	1	✓
P_00689	GFVEDLDESFK	TMX3	2	✓
P_00690	GGGALLGDR	C1RL	1
P_00691	GGGHILPYDQPLR	CPVL	1	✓
P_00692	GGLPLEEVTVAEVLAAR	ARSA	1	✓
P_00693	GGNQASVENGNAGR	SOD3	1	✓
P_00694	GGPDFSNLEK	NUDCD2	2
P_00695	GGPEDGGLGALR	S1PR4
P_00696	GGPTATSVTQGTHTTLVTR	MUC5AC	2	✓
P_00697	GGPVQVLEDEELK	SELENBP1	1	✓
P_00698	GGSSGWSGGLAQNR	C8A	2	✓
P_00699	GGTPGHHLLPLR	S1PR2	2	✓
P_00700	GGVDHAAAFGR	GLOD4	2	✓
P_00701	GGVVLKEDALPGQK	BSG	1	✓
P_00702	GHAHDGQALSTDLGVYTCEASNR	ROBO4	1	✓
P_00703	GHDSTEEPPLFSSHKPR	AOC1	2	✓
P_00704	GHGAGGASILTFWDAR	AMY1A	1
P_00705	GHGEDHCQFVDSFLDGR	ABI3BP	2	✓
P_00706	GHLHLLETSIDGILADVK	LAMC2	2	✓
P_00707	GHQDLDPDNEGELR	SLC39A10	2	✓
P_00708	GHQLQLDYFGACK	SPARCL1	1	✓
P_00709	GHSVCTNPSDK	CCL14	2	✓
P_00710	GHVSFKPSLDQQR	ITIH3	2	✓
P_00711	GICECGVCK	ITGB1	2	✓
P_00712	GIDEGPEGLK	GPD1L	2	✓
P_00713	GIGTDEFTLNR	ANXA3	1
P_00714	GIGTNEQAIIDVLTK	ANXA8	1
P_00715	GILAADESTGSIAK	ALDOA	1
P_00716	GILFVGSGVSGGEEGAR	PGD	1
P_00717	GILLFGPPGTGK	VPS4B	1
P_00718	GILTVDELLAIR	LAMP2	1	✓
P_00719	GINVALANGK	FAM3C	1	✓
P_00720	GINYNSSVAK	F11	2	✓
P_00721	GIQVLPDGR	CNOT2	2	✓
P_00722	GISEETTTGVHNLYK	AHCY	1	✓
P_00723	GISPVPINLR	DNM2	1
P_00724	GITGVDLFGTTDAVVK	COPA	1
P_00725	GIVEECCFR	INS-IGF2	2	✓
P_00726	GLAFILGAEGIK	KIAA1244	2	✓
P_00727	GLDLHGLLAFIQLQQCAQDR	LYPD3	2	✓
P_00728	GLDTSLGAVQSDTGR	MADCAM1	1	✓
P_00729	GLEPDTDWEER	AQP2	1	✓
P_00730	GLEQLLVGGSHLK	COL6A1	1	✓
P_00731	GLEVTAYSPLGSSDR	AKR1A1	1	✓
P_00732	GLGDDTALNDAR	VMO1	1	✓
P_00733	GLGEISAASEFK	NCAM1	2	✓
P_00734	GLGLDDALEPR	RUVBL2	1	✓
P_00735	GLGTDDNTLIR	ANXA4	1	✓
P_00736	GLGTDEDTLIEILASR	ANXA1	1	✓
P_00737	GLGTDEESILTLLTSR	ANXA5	2
P_00738	GLIDEVNQDFTNR	FGA	1	✓
P_00739	GLLCEENIDDCAR	NOTCH2	2	✓
P_00740	GLLEFEHQR	GANAB	1	✓
P_00741	GLNPGTLNILVR	PTPRK	2	✓
P_00742	GLPGLAGDHGEFGEK	C1QB
P_00743	GLSPGNYSVR	INSR	2	✓
P_00744	GLSTESILIPR	LCN1	1
P_00745	GLTDSIHR	CD53	2	✓
P_00746	GLVLSGVLHK	SERPINB3	2	✓
P_00747	GLVQALGLSNFNSR	AKR1A1	1	✓
P_00748	GNDISSGTVLSDYVGSGPPK	PEBP1	1
P_00749	GNDVAFHFNPR	LGALS3	1	✓
P_00750	GNEEGYFGTR	FBLN2	2	✓
P_00751	GNELSLVLLNASTGELK	CELSR2	2	✓
P_00752	GNETLHYETFGK	ICAM2	2	✓
P_00753	GNFLELSAAASAPAEK	VWA1	2	✓
P_00754	GNGGVYGWDLK	DPM1	2	✓
P_00755	GNPTVEVDLHTAK	ENO3	2
P_00756	GNPTVEVDLYTAK	ENO2	2
P_00757	GNQGFNNNWLR	CRTAC1	2	✓
P_00758	GNQWVGYDDVK	CHI3L2
P_00759	GNVGFVFTK	RPLP0	2
P_00760	GNVTQHVQGHR	SLC39A14
P_00761	GPCWCVDR	IGFBP6	2	✓
P_00762	GPDFFTR	AZU1	1	✓
P_00763	GPDSNVLLLR	ROBO4	1	✓
P_00764	GPDTLWQCPSSPWEK	CD163	2	✓
P_00765	GPFSVEADPSR	LFNG	2	✓
P_00766	GPGGAWAAEVISDAR	SAA2	2	✓
P_00767	GPGGVWAAEAISDAR	SAA1	2	✓
P_00768	GPGGVWAAK	SAA4	2	✓
P_00769	GPGVDQEPR	DSC2	2	✓
P_00770	GPVGVQTFR	LAIR1	1
P_00771	GPVLQLHDLK	MCAM	2	✓
P_00772	GPYESGSGHSSGLGHR	HRNR	1	✓
P_00773	GQCIKPLFGAVTK	FBN1	2	✓
P_00774	GQEAFVPGFNIEELLPER	CA12	2	✓
P_00775	GQFETYLR	ASAH1	1	✓
P_00776	GQFNAFSYHFR	PXDN
P_00777	GQIHLDPQQDYQLLQVQR	DBH	2	✓
P_00778	GQLPISVTCIADEIGAR	CLEC14A	1	✓
P_00779	GQSEDPGSLLSLFR	SLC3A2	1	✓
P_00780	GQVPENEANVVITTLK	CDH1	1	✓
P_00781	GQWGTVCDDGWDIK	CD5L	2	✓
P_00782	GQYISPFHDIPIYADK	PPA1	2	✓
P_00783	GSAADSEESPAIEAIHLLR	ALAD	1	✓
P_00784	GSAPPGPVPEGSIR	GSTO1	2	✓
P_00785	GSAVHQLSEELR	EPPK1	2
P_00786	GSCIANAEEVDVPIK	EPHB2	2	✓
P_00787	GSDHSASLEPGELAELVR	NANS	1	✓
P_00788	GSDPVTIFLR	VSIG4	1	✓
P_00789	GSFKPSEHVKPR	IL4R	2	✓
P_00790	GSFSEQGINEFLR	PDIA6	1	✓
P_00791	GSFSSTAAQDAQGQR	GPR180	1	✓
P_00792	GSIFVVFDSIESAK	SSB	1	✓
P_00793	GSLDDTEADVLGLVASGTPDVAR	GGT6	1	✓
P_00794	GSLLLGGLDAEASR	CSPG4	1	✓
P_00795	GSLLSEPAIQVR	KIF13B	1	✓
P_00796	GSPAINVAVHVFR	TTR	1	✓
P_00797	GSPGLSFYFK	MANBA	1	✓
P_00798	GSVAIWSGKPPICEK	CD46	2	✓
P_00799	GSYGDLGGPIITTQVTIPK	HNRNPK	2
P_00800	GTANTTTAGVPCQR	MST1	2	✓
P_00801	GTEDFIVESLDASFR	SSR1	2	✓
P_00802	GTGLTAVAVQEGNSDVVEVR	SUSD2	2	✓
P_00803	GTIEILSDVQLIK	RPLP0	1
P_00804	GTLEYLQLNTTDK	GUCY2C	2	✓
P_00805	GTLLAFAEAR	NEU1	1	✓
P_00806	GTNYLADVFEK	S100A7	2	✓
P_00807	GTQGVVTNFEIFR	EIF3B	1	✓
P_00808	GTSAVNVVLSLK	TCN1	1	✓
P_00809	GTWDHGASDVSLYR	COL12A1	2	✓
P_00810	GTWTQPFDLASTR	SERPINA6	1	✓
P_00811	GTYLTDETHR	CD46	2	✓
P_00812	GVAIGQTSLTASVTNK	NUP210	2	✓
P_00813	GVALSNVIHK	SERPINB5	1	✓
P_00814	GVDEVTIVNILTNR	ANXA2	1	✓
P_00815	GVEFSLIGESTIR	CR2	2	✓
P_00816	GVFAIFGLYDK	GRIA4
P_00817	GVGDDQLGEESEER	M6PR	2
P_00818	GVGTDEACLIEILASR	ANXA11	1	✓
P_00819	GVGYETILK	GPRC5C	1	✓
P_00820	GVISNSGGPVR	COCH	1	✓
P_00821	GVIYKPATK	CA12	2	✓
P_00822	GVLLYGPPGTGK	PSMC5	1
P_00823	GVLSYLEPR	CSPG4	1	✓
P_00824	GVNTDSGSVCR	PEPD	2	✓
P_00825	GVNTFSPEGR	PSMA5	1
P_00826	GVQVNYDLALK	SEL1L	2	✓
P_00827	GVSEIVQNGK	FABP1	1
P_00828	GVSFTFGADVVSK	PPP1CB	2	✓
P_00829	GVTFNVTTVDTK	CLIC1	2	✓
P_00830	GVTLFPDIK	CLSTN2	2	✓
P_00831	GVVDSDDLPLNVSR	HSP90B1	1
P_00832	GVVQELQQAISK	EEF1D	1
P_00833	GWMDWAAHK	NDRG2	2
P_00834	GWVTDGFSSLK	APOC3	2	✓
P_00835	GYEVHGIVR	GMDS	2	✓
P_00836	GYFYIPPLATHTICDR	CD46	2	✓
P_00837	GYIHYVFDLGNGPNVIK	NRXN3
P_00838	GYSFSLTTFSPSGK	PSMA2	1
P_00839	GYSIFSYATK	CRP	2	✓
P_00840	GYYNQSEAGSHTVQR	HLA-A	2
P_00841	GYYYEIPSIGAIR	CACNA2D1	2	✓
P_00842	HCETCISGFYGDPTNGGK	ATRN	1
P_00843	HCFYGLQPDSEYK	COL14A1	2	✓
P_00844	HCYSIQHCPLK	CFP	2	✓
P_00845	HDGQLAVSK	SIRPG	2	✓
P_00846	HDYILLPEDALTNTTR	RELN	2	✓
P_00847	HEALSPFYSER	PLAT	2	✓
P_00848	HEDTNLASSTIIK	SAG
P_00849	HEFEEAK	MAN1A1	2	✓
P_00850	HEIVQTLSLK	SELENBP1	1	✓
P_00851	HEQILVLDPPTDLK	VAPA	2	✓
P_00852	HEVLEGNVGYLR	RBP3	2	✓
P_00853	HFGYEFHYENNNVDK	ALKBH8	2	✓
P_00854	HFILDECDK	DDX39B	2	✓
P_00855	HFVALSTNTTK	GPI	1
P_00856	HFVGYPTNSDFELK	PTGR1	1
P_00857	HFVSQTTGNLYIAR	CNTN2	2	✓
P_00858	HGATVLTALGGILK	MB	2
P_00859	HGGTIPIVPTAEFQDR	GLUD1	2	✓
P_00860	HGQALGELAEQLEQAR	MYH14	1	✓
P_00861	HGSIIYHPSLLPR	ALDH1L1	1	✓
P_00862	HGTCAAQVDALNSQK	RNASET2	1	✓
P_00863	HGVCFLAADTR	UBA7	2	✓
P_00864	HGYENPTYR	APLP1
P_00865	HHLSEAAAQGR	GLS2
P_00866	HIQNIDIQHLAGK	APOB	1	✓
P_00867	HIQPGAFDTLDR	VASN	1	✓
P_00868	HISAENTK	PROCR	1	✓
P_00869	HIVLSGGSTMYPGLPSR	ACTR2	2
P_00870	HIVTFDGQNFK	VWF	2	✓
P_00871	HIYYITGETK	HSP90AA1	1
P_00872	HLALEEFYR	FSTL5	2	✓
P_00873	HLEINPDHSIIETLR	HSP90AA1	2	✓
P_00874	HLLENSTASVSEAER	ECE1	2	✓
P_00875	HLLIGLPSGAILSLPK	EMC1	2	✓
P_00876	HLNQGTDEDIYLLGK	ST6GAL1	2	✓
P_00877	HLSLLTTLSNR	GC	1	✓
P_00878	HLTPVTLELGGK	ALDH3A1	1
P_00879	HLVLACHYDSK	QPCT	1	✓
P_00880	HLWLSFDEGR	SORCS1
P_00881	HNLFEPEDTGQR	KLK2	2	✓
P_00882	HPDAVAWANLTNAIR	PLBD2	2	✓
P_00883	HPFFLDDR	ASAH1	1	✓
P_00884	HPGLADVR	MOCS2	1	✓
P_00885	HQTLQGVAFPISR	TWF1	1	✓
P_00886	HRPQVAIICGSGLGGLTDK	PNP	2	✓
P_00887	HSADICAVPAESHIYR	CD37	2	✓
P_00888	HSAQPWADFTLLGAR	OSCAR	1	✓
P_00889	HSGLYVCSVR	PSG1	2
P_00890	HSHALVSLSFLK	IGF1R	2	✓
P_00891	HSIFTPETNPR	PLG	1	✓
P_00892	HSPQEAPHVQYER	CNTFR	1	✓
P_00893	HSQPWQVLVASR	KLK3	1	✓
P_00894	HSWPENLACEELPVYDR	FRZB	2	✓
P_00895	HTLNQIDEVK	AHSG	1	✓
P_00896	HVDCQSVWDAFK	CD38	2	✓
P_00897	HVFAIFNTEQR	DNM2	2	✓
P_00898	HVFGESDELIGQK	TPI1	1
P_00899	HVGDLGNVTADK	SOD1	2
P_00900	HVGMAVAGLLADAR	PSMA3	2
P_00901	HVGWEGAK	SLC7A1	2	✓
P_00902	HVLFGTVGVPEHTYR	THY1	1	✓
P_00903	HVLQTFGPIPEFSR	CRYL1	2	✓
P_00904	HVLSVLSK	GSS	1	✓
P_00905	HVLTLTDQVTR	ITGB3	2	✓
P_00906	HVSHGEELR	PODXL2
P_00907	HVYGELDVQIQR	F13A1	2	✓
P_00908	HWLVTDIK	PEBP4	1	✓
P_00909	HWPFQVINDGDKPK	HSPA1A	1	✓
P_00910	HYCTVANPVSR	MVP	2	✓
P_00911	HYEGLSYNVDSLHQK	ADAM10	2	✓
P_00912	HYGFQLYQSDPSGNYGGWK	PSMA4	2	✓
P_00913	HYQPYAPPR	CD28	2
P_00914	IADQCPSSLAIQENANALAR	ALDOB	1	✓
P_00915	IADVTSGLIGGEDGR	GPLD1	2	✓
P_00916	IAEFAFEYAR	IDH3A	2	✓
P_00917	IAFTGSTEVGK	ALDH1A3	1
P_00918	IAIIGAGIGGTSAAYYLR	PCYOX1	2	✓
P_00919	IALGGLLFPASNLR	SHBG	2	✓
P_00920	IANLQTDLSDGLR	FLNA	1	✓
P_00921	IAPAVVHIELFR	HTRA1	1	✓
P_00922	IAQLEEQLDNETK	MYH9	1	✓
P_00923	IAQSDYIPTQQDVLR	GNAI2	1	✓
P_00924	IAQYYYTFK	F13B	2	✓
P_00925	IASLEVENQSLR	EEF1D	1	✓
P_00926	IATGHNIIDELPPCK	SYPL1	2	✓
P_00927	IATSLDGFDVASVQQQR	PLIN3	1	✓
P_00928	IAVAGDLFQPER	GAS6	1	✓
P_00929	ICDFGLAR	MAPK3	1
P_00930	ICLDLQALLYK	PF4V1	2	✓
P_00931	ICLDLQAPLYK	PF4	2	✓
P_00932	IDQNVEELK	APOA4	2	✓
P_00933	IDSSNELGFIVK	CLEC7A	1	✓
P_00934	IDSVSEGNAGPYR	LAIR1	1	✓
P_00935	IDTIAADESFTQGDLGER	EPHA10	1
P_00936	IDVVPIEPHALFLGIHGGK	IL1RN	1	✓
P_00937	IEDEQALGIQLQK	MYH2	2	✓
P_00938	IEDEQALGSQLQK	MYH7	2	✓
P_00939	IEDGNDFGVAIQEK	PSME2	1	✓
P_00940	IEDGNNFGVAVQEK	PSME1	1	✓
P_00941	IEDILEVIEK	KYNU	2	✓
P_00942	IEEALGDK	ENO3	2
P_00943	IEELQLIVNDK	PSMC5	1	✓
P_00944	IEEVIGAGEFGEVCR	EPHB3	2
P_00945	IEFTSDQAR	SEZ6L
P_00946	IEHSTFDGLDR	LRP2	1	✓
P_00947	IETISHEDLQR	PROS1	2	✓
P_00948	IEWLESHQDADIEDFK	HSPA5	2	✓
P_00949	IEYAPGAGSLALFPGIR	CLSTN3
P_00950	IFFHLNAVALGDGGHYTCR	A1BG	1	✓
P_00951	IFFPGVSEFGK	BCHE	2	✓
P_00952	IFFYDSENPPASEVLR	PON1	2	✓
P_00953	IFVGGLSPDTPEEK	HNRNPD	1
P_00954	IFYNQQNHYDGSTGK	ADIPOQ	2	✓
P_00955	IGAEVYHNLK	ENO1	1
P_00956	IGASTLLSDIER	DERA	1	✓
P_00957	IGCLTSETFQGLPR	GPR124	2	✓
P_00958	IGDPLLEDTR	ALDH9A1	1	✓
P_00959	IGDTVSFSIEAK	ITGB3	2	✓
P_00960	IGESIELTCPK	C6	2	✓
P_00961	IGFGSFVEK	ITGB1	2	✓
P_00962	IGFKPAGGIR	DERA	2	✓
P_00963	IGGIGTVPVGR	EEF1A1	1
P_00964	IGHENGEFQIFLDALDK	CA3	2	✓
P_00965	IGIVGLPNVGK	OLA1	1	✓
P_00966	IGKPAPDFK	PRDX2	1	✓
P_00967	IGTFCSNGTVSR	CDCP1	2	✓
P_00968	IGVTVLSR	CBR1	1	✓
P_00969	IGVYSPVHCIK	IFNAR1
P_00970	IGYPDDIVSNDNK	MME	1	✓
P_00971	IHAENAIR	CHMP1B	1	✓
P_00972	IHGQNVPFDAVVVDK	CLSTN1	2	✓
P_00973	IHIGSSFEK	CPB2	2	✓
P_00974	IHSDCAANQQVTYR	DSG1	2	✓
P_00975	IIALDGDTK	TKT	2	✓
P_00976	IICAQQCSGR	EGFR	2	✓
P_00977	IIEGGIYDADLNDER	CST2	2	✓
P_00978	IIELPFQNK	SERPINB5	1	✓
P_00979	IIGGSDADIK	C1S	2	✓
P_00980	IIIEELPK	CTHRC1	2
P_00981	IIIQESALDYR	GLG1	1	✓
P_00982	IILDLISESPIK	HNRNPK	2
P_00983	IILIHTLAK	ERMP1	2	✓
P_00984	IIPGGIYDADLNDEWVQR	CST4	1	✓
P_00985	IIPGGIYNADLNDEWVQR	CST1	1	✓
P_00986	IITLTGPTNAIFK	PCBP1	1	✓
P_00987	IIYGGSVTGATCK	TPI1	1
P_00988	ILAGSADSEGVAAPR	PCSK1N	2	✓
P_00989	ILAQATSDLVNAIK	TLN1	1	✓
P_00990	ILASTQFEPTAAR	ERAP1	1	✓
P_00991	ILATPPQEDAPSVDIANIR	TKT	1
P_00992	ILDAAGANLK	GRHPR	2	✓
P_00993	ILDDDTIITTLENLK	DYNC1H1	2	✓
P_00994	ILEDQEENPLPAALVQPHTGK	PGLS	1	✓
P_00995	ILETTTFFQR	UGGT1	1	✓
P_00996	ILGGIPGPIAFGWVIDK	SLCO4A1
P_00997	ILGLLDAYLK	EEF1G	1
P_00998	ILHLLGQEGPK	COPG1	2	✓
P_00999	ILHVFHGLLPGFLVK	PCSK9	2	✓
P_01000	ILLAELEQLK	VIM	1
P_01001	ILLSIGGYLFGSK	CHI3L2	1	✓
P_01002	ILNVHVPR	BPIFB2	1	✓
P_01003	ILQEYITQQSNK	AP1M2	2	✓
P_01004	ILSIAAEVAK	IQCB1
P_01005	ILTPLVSLDTPGK	GLOD4	1	✓
P_01006	ILTTSSAHPGLEFSK	FASTKD5	2	✓
P_01007	ILVDISNNLK	STEAP4	1	✓
P_01008	ILVVITDGEK	ITGAM	1	✓
P_01009	INAANYASVK	ABHD14B	2	✓
P_01010	INATDADEPNTLNSK	DSG2	2	✓
P_01011	INCELSQGCSLHLAQR	SORL1	2	✓
P_01012	INDISHTQSVSSK	LEP	2	✓
P_01013	INEAVECLLSLK	EPRS	1
P_01014	INHADFATVQLR	LAMA2	2	✓
P_01015	INHGILYDEEK	CFHR2	2
P_01016	INLGFSNLK	DMBT1	1	✓
P_01017	INNIAVAVGK	GPR180	1	✓
P_01018	INQDPLGIQGR	NAGA	1	✓
P_01019	INVGGGLSGDHCK	C8A	2	✓
P_01020	INVYYNEATGGK	TUBB4B	1
P_01021	INVYYNEATGGNYVPR	TUBB4A	2
P_01022	IPACIAGER	DEFA3	1
P_01023	IPADTFAALK	IQGAP1	1	✓
P_01024	IPDENCQINR	GPNMB	2	✓
P_01025	IPELEEAELFAEGQGR	PIEZO1	2	✓
P_01026	IPFTVSLDNGHSFPR	SUSD2	1	✓
P_01027	IQALQQQADEAEDR	TPM4	2	✓
P_01028	IQAQDPEFSDLNSAITYR	CDHR5	1	✓
P_01029	IQCAAGYEQSEHNVCQDIDECTAGTHNCR	EFEMP1	2
P_01030	IQGDLAGR	JAM3
P_01031	IQGTCYR	DEFB1	1	✓
P_01032	IQILEGWK	NQO1	2	✓
P_01033	IQLFDTQDLINVLK	FASTKD5	2	✓
P_01034	IQQEIAVQNPLVSER	OTUB1	2	✓
P_01035	IQQIPNVR	PLXDC2
P_01036	IQQLEALQR	ALDH3A1	1	✓
P_01037	IQSFLGGAPTEDLK	MSLN	1	✓
P_01038	IQSQFTDAQK	DSP	2	✓
P_01039	IQVDYDGHCK	FSTL1	2	✓
P_01040	IQVLVEPDHFK	LGALS3	1	✓
P_01041	ISCPEGTNAYR	REG1A	1
P_01042	ISGQEVNEAACDIAR	BHMT	1	✓
P_01043	ISHVWQSAGISK	MERTK	2	✓
P_01044	ISLSGVHHFAR	CLSTN1	2	✓
P_01045	ISSLLEEQFQQGK	RPS8	2	✓
P_01046	ISVTQPDSIVGIVAVDK	CD109	2	✓
P_01047	ISVYYNEATGGK	TUBB	1
P_01048	ISWAGDLDK	MPZL1	2	✓
P_01049	ISYQSSSTEER	SEMG1	2
P_01050	ITASYEDR	F11R	2	✓
P_01051	ITCAEEGWSPTPK	CFHR2	2	✓
P_01052	ITDNELELYK	SLC12A2	2	✓
P_01053	ITFTPSSGIASEVTVPK	TNR	2
P_01054	ITGEAFVQFASQELAEK	HNRNPF	1
P_01055	ITLLSALVETR	SERPINA3	1	✓
P_01056	ITQSNAILR	GSTM3	1
P_01057	ITQTAEGLDPENYLSIK	NID2	2	✓
P_01058	ITQVLHFTK	C4B	2
P_01059	ITSCIFQLLQEAGIK	PAICS	1	✓
P_01060	ITVNYPPYISK	OPCML	1	✓
P_01061	ITYEEIPLPIR	CLN5	2	✓
P_01062	IVELFVNISK	MANBA	2	✓
P_01063	IVENSDAVTEILNNAELLK	PSMD5	2	✓
P_01064	IVGGNAAQLAQFDPR	GPD1	1	✓
P_01065	IVGGWECEK	KLK2	2
P_01066	IVIGLFGK	PPIC	1	✓
P_01067	IVINTVPQLHSEK	SEMA4D
P_01068	IVSLPECFNSPYGAK	NIT2	2	✓
P_01069	IVSPEPGGAVGPNLTCR	SEZ6L2	2	✓
P_01070	IWQYVYSK	ACTR1A	1
P_01071	IYALPDDLVEVKPK	PLS1	2	✓
P_01072	IYGADDIELLPEAQHK	MTHFD1	2	✓
P_01073	IYGPFCECDNFSCAR	ITGB5	2	✓
P_01074	IYLGQLECFSLGNLDAK	GMDS	1	✓
P_01075	IYPGVDFGGEELNVTFVK	KLKB1	2	✓
P_01076	IYSGILNLSDITK	KLKB1	2	✓
P_01077	IYVDDGLISLQVK	PKM	1
P_01078	KDVLETFTVK	CD9	1
P_01079	KELEEDFIK	COTL1	1
P_01080	LAACVNLIPQITSIYEWK	CUTA	2	✓
P_01081	LAADDPEVR	EFNA1	2	✓
P_01082	LAALNPESNTAGLDIFAK	CLIC1	1	✓
P_01083	LAATNALLNSLEFTK	KPNB1	1	✓
P_01084	LADFFTNCQPESR	GFRA1	2	✓
P_01085	LADLIER	ALDH1A1	2
P_01086	LAEGFPLPLLK	LBP	2	✓
P_01087	LAELPADALGPLQR	IGFALS	2	✓
P_01088	LAEVALAYAK	ALAD	2	✓
P_01089	LAGLFNEQR	HYOU1	1	✓
P_01090	LAGLGLQQLDEGLFSR	VASN	1	✓
P_01091	LAGTQPLEVLEAVQR	UBA1	1	✓
P_01092	LAIDYGIK	RAB8B	2	✓
P_01093	LAIEAGFR	AKR1C1	1
P_01094	LAILGIHNEVSK	ACTN1	1	✓
P_01095	LALASLGYEK	PDCD6IP	1	✓
P_01096	LALGDDSPALK	GOT1	1	✓
P_01097	LALIQLQISSIK	NIT2	1	✓
P_01098	LALLVDTVGPR	CPQ	1	✓
P_01099	LAPAVLLTGLTEVPVPTR	SLC4A7	2	✓
P_01100	LAPGTIVEVWK	HEXB	2	✓
P_01101	LAQDPFPLYPGEVLEK	MVP	1	✓
P_01102	LASDGATWADIFK	PLBD2	2	✓
P_01103	LASLFPALFSR	MINPP1	2	✓
P_01104	LASPGFPGEYANDQER	MASP2	1	✓
P_01105	LASVPGSQTVVVK	PODXL	1	✓
P_01106	LAVTTHGLPCLAWASAQAK	F2	1	✓
P_01107	LCQDLGPGAFR	SERPINF2	2	✓
P_01108	LCSTEEETAELLSK	INPP1	1	✓
P_01109	LCYVGYNIEQEQK	ACTR2	1	✓
P_01110	LDAVYLNK	TSHR
P_01111	LDDFVETGDIR	SCARB2	2	✓
P_01112	LDFTGNLIEDIEDGTFSK	OGN	2	✓
P_01113	LDGSTNFTR	FGL2	2	✓
P_01114	LDHLHVEVTASNSK	ITIH5
P_01115	LDLLEDR	GANAB	1	✓
P_01116	LDLSENQIQGIPR	SLIT3	1	✓
P_01117	LDNYSTQELGK	NT5E	2	✓
P_01118	LDPQSGALYISK	CD48	2	✓
P_01119	LDPTQTSFLK	NDRG2	1	✓
P_01120	LDTLAQEVALLK	CLEC3B	1	✓
P_01121	LEAGDHPVELLAR	SPARC	2	✓
P_01122	LEAVQYK	CSTA	1	✓
P_01123	LEEHYELR	SERPINB2	2	✓
P_01124	LEETITQAR	CACNA2D1	2	✓
P_01125	LEGEACGVYTPR	IGFBP2	1	✓
P_01126	LEGEPVALR	IL1R2
P_01127	LEHIDGVNLTVPVK	RPUSD3	2	✓
P_01128	LEHQFAVGEDSGR	MAN2B1	2	✓
P_01129	LELDAIELTR	AXDND1
P_01130	LELDLHGLR	PMFBP1
P_01131	LELLSLSK	CPN2	1	✓
P_01132	LEPAALGALPLLR	LRRC26	1	✓
P_01133	LEQGYELQFR	AGL	1	✓
P_01134	LEQLGGLLANVSGELGGR	EMILIN1	2	✓
P_01135	LETFIQEHLR	CD151	2	✓
P_01136	LETPAPQVPAR	PCSK1N
P_01137	LFCIPVHGIR	IMPA1	2	✓
P_01138	LFDEINPETK	SERPINA10	2	✓
P_01139	LFDQAFGLPR	HSPB1	1	✓
P_01140	LFGGLILDIK	SLC4A7	2	✓
P_01141	LFGGNFAHQASVAR	TPP1	1	✓
P_01142	LFIYNPTTGEFLGR	ATP1B3	2	✓
P_01143	LFNVTPQDEQK	ICOSLG	2	✓
P_01144	LFPDFFTR	PRTN3	1	✓
P_01145	LFQVEYAIEAIK	PSMA5	2	✓
P_01146	LFSGDVVLTAR	CBR1	1
P_01147	LFTALFPFEK	ITGAM	1	✓
P_01148	LFVQDLATR	KIF5B	2	✓
P_01149	LFVYDPNNPPSSEVLR	PON2	2	✓
P_01150	LGAEVYHTLK	ENO2	2
P_01151	LGAILTPNDGR	ITGB2	2	✓
P_01152	LGALALSPK	CDH16	2	✓
P_01153	LGALGGNTQEVTLQPGEYITK	ZG16B	1	✓
P_01154	LGDVISIQPCPDVK	VCP	1	✓
P_01155	LGDVYVNDAFGTAHR	PGK1	1
P_01156	LGELFNPYYDPLQWK	CHGB	2	✓
P_01157	LGEPIPISK	FAH	2	✓
P_01158	LGERPPALLGSQGLR	NRXN2
P_01159	LGESQTLQQFSR	SPTAN1	2
P_01160	LGEVNTYAGDLQK	APOA4	1	✓
P_01161	LGFAGLVQEISFGTTK	CCT5	1	✓
P_01162	LGFEDGSVLK	UCHL1	2	✓
P_01163	LGFEEFK	CAPNS1	1
P_01164	LGFRPAEDDPHR	CD248	1	✓
P_01165	LGHPDTLNQGEFK	S100A9	1	✓
P_01166	LGIHEDSTNR	HSP90AB1	2
P_01167	LGIYDADGDGDFDVDDAK	ASPH	2	✓
P_01168	LGLLGDSVDIFK	CEL	1	✓
P_01169	LGNFFSPK	IQGAP1	1	✓
P_01170	LGNQEPGGQTALK	SERPINF2	2	✓
P_01171	LGNTISSLFGGGTTPDAK	HYOU1	2	✓
P_01172	LGPGGLDPVEVYESLPEELQK	CDC37	1	✓
P_01173	LGSLHPHTPYHIR	AXL	1	✓
P_01174	LGSSEVEQVQLVVDGVK	CKM	2	✓
P_01175	LGVNDCVLR	DLG3	2	✓
P_01176	LGVQDLFNSSK	SERPINB1	1	✓
P_01177	LGVRPSQGGEAPR	FN1	1	✓
P_01178	LGVTANDVK	MDH1	1	✓
P_01179	LGYNANTSVLSFQAVCR	CFHR4	2	✓
P_01180	LGYSDITIFEK	DPYD	1	✓
P_01181	LHGEVPQIEVTR	KIAA1468	2	✓
P_01182	LHGGSAPLPQDR	SORL1	2	✓
P_01183	LHLDYIGPCK	SPARC	2	✓
P_01184	LHLGTTQNSLTEADFR	VPS4B	1	✓
P_01185	LHLPADDVVSIIEEVEEK	VGF
P_01186	LHQYDGSIVVIQNPAR	CADM4	1	✓
P_01187	LHTLGDNLLDSR	LAMB1	2
P_01188	LHVDPENFK	HBG1	2
P_01189	LIALLEVLSQK	FLNB	1
P_01190	LIEGVLDFK	CRAT	2	✓
P_01191	LIESAEELIR	DNAJC3	1
P_01192	LIGQIVSSITASLR	TUBA1A	1
P_01193	LIIWDSYTTNK	GNB2	1
P_01194	LILADALCYAHTFNPK	LAP3	1	✓
P_01195	LIPLLLQLTSR	NOMO3	2
P_01196	LIQEAPKPECEK	C4BPB	2	✓
P_01197	LISEVIGER	GPD1	2	✓
P_01198	LISQIVSSITASLR	TUBA1C	1
P_01199	LISVDTEHSNIYLQNGPDR	CP	1	✓
P_01200	LISWYDNEFGYSNR	GAPDH	2
P_01201	LITWSPVCR	GPX1	2	✓
P_01202	LIVHNGYCDGR	RBP4	1	✓
P_01203	LKEDAVSAAFK	LUM	1	✓
P_01204	LKELTLEDLK	CD14	1	✓
P_01205	LLADPTGAFGK	PRDX5	1	✓
P_01206	LLAENNEIISNIR	MAN2A1	1	✓
P_01207	LLAQTTLR	STOM	1
P_01208	LLCEVTPVSGQER	LAG3
P_01209	LLCGLLAER	MIF	2	✓
P_01210	LLDEEEATDNDLR	PDCD6IP	1	✓
P_01211	LLDLITWELEPDGALDR	DKK3	2	✓
P_01212	LLDLYSAGEQR	MXRA8	1	✓
P_01213	LLDNLNQDAPDTYHYVVSEPLGR	DNASE1	1	✓
P_01214	LLDSLPSDTR	SERPING1	1	✓
P_01215	LLDSSTVTHLFK	PSMA6	1	✓
P_01216	LLEGETLSVQCSYK	TREML2	2	✓
P_01217	LLELDPEHQR	P4HA1	2	✓
P_01218	LLESSLSSSEGEEPVEYK	ITGA5	2
P_01219	LLETIDQLYLEYAK	ACTN1	1	✓
P_01220	LLGCAVLAPR	CPZ	1	✓
P_01221	LLGELLQDNAK	TALDO1	1
P_01222	LLGLGVTDFSR	MYH14	1	✓
P_01223	LLGLSLAGK	LYVE1	1	✓
P_01224	LLHQLADLVER	ALDH1A3	1	✓
P_01225	LLIIGDSGVGK	RAB35	2	✓
P_01226	LLLIGDSGVGK	RAB8B	1
P_01227	LLLLGAGESGK	GNAS	1
P_01228	LLNDEDPVVVTK	JUP	2	✓
P_01229	LLNQPNQWPLVK	JUP	2	✓
P_01230	LLNVGFQEALK	B4GALT1	2	✓
P_01231	LLPAQLPAEK	ECM1	2	✓
P_01232	LLPVQENFLLK	CALB1	1
P_01233	LLQAGFSELK	DNPEP	1	✓
P_01234	LLQDEFPGIPSPLDAAVECHR	HPX	1	✓
P_01235	LLQDFFNGR	HSPA1A	1	✓
P_01236	LLTEHVFR	RTN4RL2	1	✓
P_01237	LLTSFLPAQLLR	SLC3A2	1	✓
P_01238	LLTVPFEK	PGLS	1	✓
P_01239	LLVGPTTLAQEGFLVDTPLAR	GGT6	1	✓
P_01240	LLVSASQDGK	GNB1	1
P_01241	LLYSGVPFLGPYHK	ST14	2	✓
P_01242	LNAIYQNNLTK	GSR	1	✓
P_01243	LNFSHGTHEYHAETIK	PKM	1
P_01244	LNIGYIEDLK	SERPINB2	2	✓
P_01245	LNILDTLSK	PSMD2	1	✓
P_01246	LNILNNNYK	APOL1	2	✓
P_01247	LNLAFIANLFNR	LCP1	1	✓
P_01248	LNLGTVGFYR	NPEPPS	1	✓
P_01249	LNLHYAVVSK	QARS	2	✓
P_01250	LNLNNTVLSK	EPRS	2	✓
P_01251	LNLSENYTLSISNAR	ALCAM	2	✓
P_01252	LNNAPVAGYEGDVGSK	ST3GAL4	2	✓
P_01253	LNSPLSLPFVPGR	PROL1	1	✓
P_01254	LNSQGFGCAWLSK	RS1
P_01255	LNSYIQGK	HEBP2	2	✓
P_01256	LPACVVDCGTGYTK	ACTR3	1	✓
P_01257	LPDAAEPCLPGALFR	ITGAL	2	✓
P_01258	LPIPESQVITINPELPVEEAAEDYAK	PGLS	2	✓
P_01259	LPTDSELAPR	SEPP1	2	✓
P_01260	LQAAQLPHTGVFGQSFSCPSDR	CD68	2	✓
P_01261	LQAEVLECVSLVELTSLK	APRT	2	✓
P_01262	LQALANEQAAAAHELEK	KTN1	2	✓
P_01263	LQAVTDDHIR	BLVRB	1	✓
P_01264	LQCTYIEVEQVSK	SCRN2	2	✓
P_01265	LQDAEIAR	S100A6	1	✓
P_01266	LQDLYSIVR	COL18A1	2	✓
P_01267	LQEAEEAVEAVNAK	MYH7	2	✓
P_01268	LQEGQTLEFLVASVPK	LAMB2	2	✓
P_01269	LQGTLFSTEEEPSK	CA14	2	✓
P_01270	LQHEALNEAFSR	PAPPA2	2	✓
P_01271	LQIWDTAGQER	RAB35	1
P_01272	LQLEAVNITDLSENR	IL1RN	1	✓
P_01273	LQMEAPHIIVGTPGR	EIF4A1	2
P_01274	LQNNENNISCVER	CFHR1	2
P_01275	LQQDVLQFQK	GOLM1	1	✓
P_01276	LQQGYNAMGFSQGGQFLR	PPT1	1
P_01277	LQSSGIQPAAFR	OPTC	2	✓
P_01278	LQSSNIFTVAK	AP1B1	1	✓
P_01279	LQTFASNWR	CTSH
P_01280	LQVLPELLFQSTPK	SLIT3	1	✓
P_01281	LQVVDQPLPVR	FASN	1	✓
P_01282	LSAFVFPGELLLR	SLC1A5	2	✓
P_01283	LSAVNSIFLSHNNTK	CD97	2	✓
P_01284	LSCADTTR	OR2AJ1
P_01285	LSDLLAPISEQIK	CAP1	1	✓
P_01286	LSDVSSGELALIILALGVCR	TCN1	1	✓
P_01287	LSEELSGGR	ACTR3	1
P_01288	LSEPAELTDAVK	KLK3	1	✓
P_01289	LSFSEINTR	GALNT5	2	✓
P_01290	LSGCQNITSTK	IFNAR1	2	✓
P_01291	LSGLHGQDLFGIWSK	ACPP	1	✓
P_01292	LSGSNPYTTVTPQIINSK	ACTN4	1	✓
P_01293	LSGTGSAGATIR	PGM1	1
P_01294	LSGVEDGHQR	COL15A1	1	✓
P_01295	LSLEHLNPSIYVGLR	TCN2	1	✓
P_01296	LSLEIEQLELQR	C4BPA	2	✓
P_01297	LSNNALSGLPQGVFGK	CPN2	1	✓
P_01298	LSQAQGNLSVLETR	IGSF3	2	✓
P_01299	LSQIGVENTEENR	ALDOC	2
P_01300	LSSPAVINSR	PRSS2	2	✓
P_01301	LSVEALNSLTGEFK	CKM	2
P_01302	LSYEGEVTK	SERPINF1	1	✓
P_01303	LTEPADTITDAVK	KLK1	1	✓
P_01304	LTEPQHGLGSQR	STIM1	2
P_01305	LTFINDLCGPR	ECM1	2	✓
P_01306	LTFYGNWSEK	SPON1	2	✓
P_01307	LTGFHETSNINDFSAGVANR	GLUL	1	✓
P_01308	LTGISDPVTVK	OLFM1	2	✓
P_01309	LTIYNANIEDAGIYR	NCAM2	2	✓
P_01310	LTLEDQATFIK	DAG1	2
P_01311	LTLIDPETLLPR	CAND1	2	✓
P_01312	LTLLAPLNSVFK	TGFBI	2	✓
P_01313	LTLTSDESTLIEDGGAR	SERINC1	2
P_01314	LTQLGTFEDHFLSLQR	EGFR	2	✓
P_01315	LTQLNLDR	GP1BA	2	✓
P_01316	LTSLPLGALR	GP1BA	2	✓
P_01317	LTTDFNVIVEALSK	SSB	1	✓
P_01318	LTVEDPVTVEYITR	PSMA7	1
P_01319	LTVTSQNLQLENLR	CD74	2	✓
P_01320	LTYTAEVSVPK	LTA4H	2	✓
P_01321	LVDQNIFSFYLSR	CTSD	1	✓
P_01322	LVDTLPQKPR	SCGB1A1	1	✓
P_01323	LVECLETVLNK	AP2A1	1	✓
P_01324	LVEGEVYAVDER	GGACT	1	✓
P_01325	LVFVHSAEGNEFWSALLEK	CAPN1	1	✓
P_01326	LVGGPVAGGDPNQTIR	LAMA5	2	✓
P_01327	LVGLLDLALEK	AMY2B	1	✓
P_01328	LVGLLDLALEKDYVR	AMY2B	1
P_01329	LVGQSIIAYLQK	COPA	1	✓
P_01330	LVGYLDR	PSAP	1	✓
P_01331	LVIIEGDLER	TPM3	2	✓
P_01332	LVIITAGAR	LDHA	1
P_01333	LVLCEVFK	GLUL	1	✓
P_01334	LVLLGESAVGK	RAB5A	2
P_01335	LVLSDLHLLTQSQVR	L1CAM	2	✓
P_01336	LVLVNAVYFR	SERPINB6	1	✓
P_01337	LVNEVTEFAK	ALB	1	✓
P_01338	LVNVVLGAHNVR	PRTN3	1	✓
P_01339	LVPLGVFTGLSNLTK	LINGO2
P_01340	LVPNPGQEDADR	COMP	2	✓
P_01341	LVQAFQFTDK	PRDX1	1	✓
P_01342	LVSEDPINDGEWHR	HSPG2	1	✓
P_01343	LVTLEEFLASTQR	NUCB1	1	✓
P_01344	LVTLEEFLK	NUCB2	1	✓
P_01345	LVVFPTDDISLK	L1CAM	2	✓
P_01346	LVVLGSGGVGK	RAP1B	2
P_01347	LVVPATQCGSLIGK	PCBP1	1	✓
P_01348	LWDLTTGTTTR	GNB2L1	1	✓
P_01349	LWNSTFLEEYSK	ITGA6	2	✓
P_01350	LYACEVTHQGLSSPVTK	GPR98	2	✓
P_01351	LYDDIDFDIEEFAK	CNDP2	1	✓
P_01352	LYDIEQQQIR	CRYL1	1	✓
P_01353	LYDNLLEQNLIR	PSMD11	1	✓
P_01354	LYENFISEFEHR	PSMD13	2	✓
P_01355	LYLVDLAGSEK	KIF5B	1
P_01356	LYQPYGDSAGSLHSTSR	CELSR2
P_01357	LYQQHGAGLFDVTR	TPP1	1	✓
P_01358	LYQVEYAFK	PSMA6	1	✓
P_01359	LYSSAEFGR	SORCS1
P_01360	LYTLVLTDPDAPSR	PEBP1	1	✓
P_01361	MFLVNSFLK	CAPNS1	1
P_01362	MSQAEFEK	DBI
P_01363	NADLQVLKPEPELVYEDLR	PIGR	1	✓
P_01364	NAELDGFPQLR	KSR2
P_01365	NAGVEGSLIVEK	HSPD1	2	✓
P_01366	NALALFVLPK	SERPINA7	1	✓
P_01367	NALTGLPPGLFQASATLDTLVLK	LRG1	2	✓
P_01368	NALWHTGDTESQVR	COMP	2	✓
P_01369	NANTFISPQQR	MGP	2	✓
P_01370	NAQAIEDMVGYAQETQHEK	PSMD1	2
P_01371	NAVHVNLFETPVEAQYVR	MFGE8	1	✓
P_01372	NCNDFQYESK	YWHAH	2
P_01373	NCQTLVNLCSR	NOTCH2	2	✓
P_01374	NDAPVVQEPR	ROR1	1
P_01375	NDLSPTTVMSEGAR	BLVRB	1
P_01376	NDNAEGIIEFDPK	GPR98
P_01377	NDVSNPQGTLQDGTSR	ADH1A	2	✓
P_01378	NDYEFCAK	LMAN1	2	✓
P_01379	NEEALDTESSER	NEO1	2	✓
P_01380	NFILDQTNVSAAAQR	HNRNPU	2	✓
P_01381	NFINNPLAQADWAAK	MYH9	1	✓
P_01382	NFNIHGTNK	GNS	1	✓
P_01383	NFNLPASHYYK	KSR2
P_01384	NFSDNQLQEGK	TAGLN2	1
P_01385	NFSSPILAR	SLAMF7	2	✓
P_01386	NFVDSPIIVDITK	GBA	2	✓
P_01387	NFVINVVNR	COL6A2	2	✓
P_01388	NFYYAAVPSAR	GALNT2	2	✓
P_01389	NGDILTLK	FABP3	1	✓
P_01390	NGDVSQFPYVEFTGR	TMEM106B	2	✓
P_01391	NGEEFSFLK	SERPINI1	1	✓
P_01392	NGLVNSEVHNEDGR	TMEM106B	2
P_01393	NGQWTLIGR	PAM	2	✓
P_01394	NGSGTLDLEEFLR	CAPS	1	✓
P_01395	NGVGVLIWK	LYVE1	2	✓
P_01396	NGVLEEAIIATILK	STK39	1	✓
P_01397	NGYPDLIVGAFGVDR	ITGAV	2	✓
P_01398	NIAAFGGNPK	BCHE	2	✓
P_01399	NIDQAVTAALETR	GGT1	1
P_01400	NIETIINTFHQYSVK	S100A9	1	✓
P_01401	NIETNYTR	CLN5	2	✓
P_01402	NIFWTDSNLDR	NID1	2	✓
P_01403	NIIHGSDSVK	NME2	1
P_01404	NILTEIYR	RAB11B	2	✓
P_01405	NILTSNNIDVK	APOD	1	✓
P_01406	NINLIVQK	AP1B1	1
P_01407	NIQSLEVIGK	PPBP	2	✓
P_01408	NISFTVWDVGGQDK	ARF1	1
P_01409	NISIHQAYQQCK	PROM2
P_01410	NISNQLSIGTDISAQHPELR	SCRN2	2	✓
P_01411	NITDLVEGAK	SLC44A2	2	✓
P_01412	NITQIVGHSGCEAK	NBL1	2	✓
P_01413	NIYLNSGLTSTK	ADAM17	2	✓
P_01414	NLDENYCR	PLG	2	✓
P_01415	NLEGYVGFANLPNQVYR	SEPT7	1
P_01416	NLEPVSWSSLNPK	EFNB1	1	✓
P_01417	NLEWIAGGTWTPSALK	COL6A2	2
P_01418	NLFETPILAR	MFGE8	1	✓
P_01419	NLFNVVDCK	EIF3B	1	✓
P_01420	NLFPSNLVVAAFR	SLC1A4	2	✓
P_01421	NLHYDTFLVIR	LMAN2L	2	✓
P_01422	NLQDFAACGIDR	PROM1	1	✓
P_01423	NLQPASEYTVSLVAIK	FN1	1	✓
P_01424	NLQSQSSVNVIVK	KIAA0319L	2	✓
P_01425	NLVLHSARPGAPPPQPLDLQHR	HSPG2	1	✓
P_01426	NMAQFSVLLPR	MTAP	2
P_01427	NNANGVDLNR	CPN1	2	✓
P_01428	NNEAFLQELELK	NOV	2	✓
P_01429	NNEEYLALIFEK	QSOX1	2	✓
P_01430	NNIISTVQPGAFLGLGELK	GPR124	2	✓
P_01431	NNLEALEDFEK	LCN1	1
P_01432	NNPSKPLHVIK	WDR1	1	✓
P_01433	NNQIDHIDEK	LUM	1	✓
P_01434	NPAATCVDLQLR	CPZ
P_01435	NPDEEDNTFYQR	LXN	2	✓
P_01436	NPELNPCSVNAQCIEER	THBS4	2	✓
P_01437	NPEQEPIPIVLR	ARHGAP1	1	✓
P_01438	NPILWNVADVVIK	RPN2	2	✓
P_01439	NPLDGSVLLR	PVRL4	1	✓
P_01440	NPNGTVTVISR	PVRL1	2	✓
P_01441	NPVLQQDAHSSVTITPQR	CD276	1	✓
P_01442	NPVVYGVFTTSSNIFK	SEMA3A
P_01443	NQAPPGLYTK	ASS1	1	✓
P_01444	NQAVNFLR	CHMP1B	1	✓
P_01445	NQDNLQGWNK	CMPK1	1
P_01446	NQEQLLTLASILR	HEBP2	1	✓
P_01447	NQGNTWLTAFVLK	PZP	2
P_01448	NQLTSNPENTVFDAK	HSPA5	1
P_01449	NQNTFLR	RNASE3	2	✓
P_01450	NQYDNDVTVWSPQGR	PSMA1	2	✓
P_01451	NSCNNFIYGGCR	SPINT2	2	✓
P_01452	NSCPPTSELLGTSDR	GPX3	1	✓
P_01453	NSDLLLLVDTHK	CASC4	2	✓
P_01454	NSIPIVTEQPLISAGENR	GRHL1	2	✓
P_01455	NSLTHISPR	LRRC15	1	✓
P_01456	NSLWHTGDTSDQVR	THBS4	2	✓
P_01457	NSQSFFSGLFGGSSK	NAPA	1
P_01458	NSSYFVEWIPNNVK	TUBB4A	2	✓
P_01459	NSTIEAANLAGLK	HSPA13
P_01460	NSVSQISVLSGGK	ARPC1B	1	✓
P_01461	NSWGPEWGSNGYVK	CTSV	2	✓
P_01462	NTEISFILGQEFDEVTADDR	FABP4	2	✓
P_01463	NTGVISVVTTGLDR	CDH1	1	✓
P_01464	NTLCAPEVISLINTR	FAF2	2	✓
P_01465	NTNSSNNFSR	ITFG3	2	✓
P_01466	NTTDTLITLDTSR	VCAN	2	✓
P_01467	NVDGVNYASITR	CTSZ	1	✓
P_01468	NVDMLSELVQEYDEPILK	NAP1L4	1
P_01469	NVFDEAILAALEPPEPK	CDC42	1	✓
P_01470	NVHGINFVSPVR	CTSC	1	✓
P_01471	NVLDSEDEIEELSK	CHID1	1	✓
P_01472	NVNQSLLELHK	FTH1	1	✓
P_01473	NVSIGIVGK	PSMA1	1	✓
P_01474	NVSNLKPVPLIGPK	SCCPDH	2
P_01475	NVTELNEPLSNEER	YWHAG	2	✓
P_01476	NVTHLLQQELTEAQK	BST2	2	✓
P_01477	NVVALDTEVASNR	LDLR	2	✓
P_01478	NVVTIFSAPNYCYR	PPP2CA	1
P_01479	NWGLGGHAFCR	F12	2	✓
P_01480	NWQLTEEDFGNTSGR	SLC7A1	2	✓
P_01481	NWQWGGLTCDHYEEAK	CD163	2	✓
P_01482	NYFEGTGYAR	LAMA3
P_01483	NYGQLDIFPAR	MUC1	1	✓
P_01484	NYIVEDGDIIFFK	OLA1	1	✓
P_01485	NYLQSLPSK	MAPK3	2	✓
P_01486	NYNENLTLIR	ADAMDEC1	2	✓
P_01487	NYTDEAIETDDLTIK	PSMA7	1	✓
P_01488	NYTPQLSEAEVER	MMP8	1	✓
P_01489	PALNLIYK	ST3GAL6	1	✓
P_01490	QAALQVAEGFISR	CAPG	1	✓
P_01491	QAEISASAPTSLR	SHBG	2	✓
P_01492	QALAQISLPR	MPO	1	✓
P_01493	QATVGDINTERPGMLDFTGK	DBI	2
P_01494	QCFLNQSHR	SCGB2A1	1	✓
P_01495	QDIAFAYQR	ANXA2	1	✓
P_01496	QEPGENSEILPTLK	GPX3	1	✓
P_01497	QFIENGSEFAQK	LACRT	1	✓
P_01498	QFIQGPPEVIR	ECHDC1	1	✓
P_01499	QFPFLASIQNQGR	AZU1	1	✓
P_01500	QGPVNLLSDPEQGVEVTGQYER	ITIH4	1	✓
P_01501	QIDLLTYCNLVHGR	CD226	2	✓
P_01502	QITLNDLPVGR	PRDX4	1	✓
P_01503	QLDVLYPK	MSLN	1	✓
P_01504	QLEEEQQALQK	TPM2	2	✓
P_01505	QLGPQPQDIIYYEDGVVPTTDR	CD7	2	✓
P_01506	QLLDQVEQIQK	TMED4	2	✓
P_01507	QLNEINYEDHK	CFB	1	✓
P_01508	QLSSGVSEIR	HSPB1	1
P_01509	QLTFEEIAK	PSMD13	1
P_01510	QLTWFYTFDQK	CD48	2	✓
P_01511	QLVEQVEQIQK	TMED9	2	✓
P_01512	QLYGDTGVLGR	C8G	2	✓
P_01513	QLYPASAFPEDFSILTTVK	COL5A1	2	✓
P_01514	QQASSWVPLLNK	SFRP1	1	✓
P_01515	QQTVGGVNYFFDVEVGR	CST1	1	✓
P_01516	QQVTGEPQER	AHSP
P_01517	QSGQCLDIDECR	FBLN5	1	✓
P_01518	QSLFFYPSYPDEVR	ARSA	1	✓
P_01519	QSVTYACNK	CD55	1	✓
P_01520	QTALVELVK	ALB	1	✓
P_01521	QTHQPPAPNSLIR	C1QC	2	✓
P_01522	QTLQNASETVK	LY75	2	✓
P_01523	QTQIFTTYSDNQPGVLIQVYEGER	HSPA1B	1	✓
P_01524	QTSILIQK	SPINK1	2	✓
P_01525	QTYFLPVIGLVDAEK	PSMC3	1	✓
P_01526	QVADEGDALVAGGVSQTPSYLSCK	BHMT	1	✓
P_01527	QVGSGVTTDQVQAEAK	IGHG1	2	✓
P_01528	QVPNESFFNFFNPLK	NAP1L4	1	✓
P_01529	QVQSLTCEVDALK	VIM	1
P_01530	QVSASELHTSGILGPETLR	EPPK1	1
P_01531	QVSTVVCVHEPR	NAGPA	2	✓
P_01532	QVVESAYEVIK	LDHA	1
P_01533	QWVPVLQDFSNK	ITFG1	2	✓
P_01534	QWYESHYALPLGR	RPS8	2	✓
P_01535	QYLINSQCCSLCQPGQK	CD40	2	✓
P_01536	QYNSTGDYR	TSPAN6
P_01537	RPSEIVIGQCK	HRG	1	✓
P_01538	RPYQEGTPCSQCPSGYHCK	PI16	2	✓
P_01539	SAADSISESVPVGPK	USP5	1
P_01540	SADCYNEIYNFK	TMEM87A	2	✓
P_01541	SAEITGVR	MOCS2	1	✓
P_01542	SAGDVDTLAFDGR	AGRN	1	✓
P_01543	SAGSVESPSVSSTHR	IGFBP3	2
P_01544	SALVLQYLR	F9	2	✓
P_01545	SALYSPSDPLTLLQADTVR	QSOX1	1	✓
P_01546	SAQFFNYK	PLOD1	2	✓
P_01547	SATWTYSPLLK	TP73
P_01548	SAVTGSCVNDGVHIIR	CUBN	1	✓
P_01549	SCAVAEYGVYVK	HP	1
P_01550	SCDLALLETYCATPAK	INS-IGF2	2
P_01551	SDACQGDSGGPLACEK	HGFAC	2	✓
P_01552	SDDSVIQLLNPNR	CADM1	1	✓
P_01553	SDENEQHLGVK	MASP1	2	✓
P_01554	SDFSNEER	C1S	2
P_01555	SDFYDIVLVATPLNR	PCYOX1	2	✓
P_01556	SDGFSIETCK	CAPN2	2	✓
P_01557	SDGSCAWYR	TIMP2	2	✓
P_01558	SDGSLEDGDDVHR	SERINC1	2
P_01559	SDLAVEAGAPYAER	IGSF8	2	✓
P_01560	SDLEVAHYK	C8B	2	✓
P_01561	SDPTSYAGYIEDLK	ATP1B3	2	✓
P_01562	SDQQLDCALDLMR	CAPZB	1
P_01563	SDSEVAGYIR	CPVL	1	✓
P_01564	SDTSSNHAVLK	C1QTNF3	2	✓
P_01565	SEAAAVQPVIGISQR	PIK3IP1	1	✓
P_01566	SEAAHQGVITWNPPQR	PTPRC	2	✓
P_01567	SEDCFILDHGK	GSN	1	✓
P_01568	SEDYVELVQR	PLOD3	2	✓
P_01569	SEEFLIAGK	TIMP1	2	✓
P_01570	SEEWADNHLPLTDAELAR	PLIN3	2	✓
P_01571	SEIDLVQIK	ANXA7	1	✓
P_01572	SEIQFLISDNQGFSCPEK	DSG2	2	✓
P_01573	SELEQLRQEAEQLR	GNB2	1
P_01574	SETDLLDIR	ANXA11	1	✓
P_01575	SETVLTCATGR	ITGA3	2	✓
P_01576	SEVVVPAPKPADGK	ZCCHC2
P_01577	SFCDLTDEWR	IFNAR2	2	✓
P_01578	SFEDLTDHPVTR	ADAM17	2
P_01579	SFEGNNNYDTPELR	NRP1	2	✓
P_01580	SFFTDDDK	ARHGDIB	2	✓
P_01581	SFLENPLTAATK	GRHL1
P_01582	SFPDFPTPGVVFR	APRT	1
P_01583	SFSLGDIYFK	IGF2R	1	✓
P_01584	SFSWALDFCK	FUT3	2	✓
P_01585	SFVLNLGK	LGALS1	2
P_01586	SFVYGGCLGNK	SPINT1	2	✓
P_01587	SFYGSTLFLCR	FASN	1	✓
P_01588	SGAGTELSVR	SIRPB1	1
P_01589	SGAQATWTELPWPHEK	HPX	1	✓
P_01590	SGCNHPDLDVQYR	PLAUR	2	✓
P_01591	SGEEALIIPPDAVAVDCK	ITM2B	2	✓
P_01592	SGEESYNLDSVAK	ACY3	2	✓
P_01593	SGELEQEEER	CHGA	2
P_01594	SGEYWIDPNQGCNLDAIK	COL1A1	2	✓
P_01595	SGFTYVLHEGECCGR	VWF	2	✓
P_01596	SGGGGDIHQGFQSLLTEVNK	SERPINB6	1	✓
P_01597	SGIAWWTDYHVK	TMEM30B
P_01598	SGIECQLWR	F2	1	✓
P_01599	SGLSSPIYIDLR	UMPS	1	✓
P_01600	SGNQVSEYISR	PDE4C
P_01601	SGSAHEYSSSPDDAIFQSLAR	CPE	1	✓
P_01602	SHAPNPAAPVCPCLEGFYR	EPHB6	1	✓
P_01603	SHDVYWDIEGAVR	PIGS	2	✓
P_01604	SHGGIYVCR	CD79A	2	✓
P_01605	SHLIIAQVAK	BTD	1	✓
P_01606	SHLQLLNSK	VTCN1
P_01607	SHQIEELEQQIEK	KIF20B	2	✓
P_01608	SHSAHFFEFLTK	DDT	1
P_01609	SHSGGELESLAR	PDGFB	2	✓
P_01610	SIATLAITTLLK	COPG1	1
P_01611	SICTTVLELLDK	YWHAQ	2
P_01612	SIEVFGQFNGK	C9	2	✓
P_01613	SIGVSNFNHR	AKR1C2	1	✓
P_01614	SIGVSNFNR	AKR1C1	1
P_01615	SIIIHTSEDGK	CNR1
P_01616	SIILEYHQDR	MUC5AC	2	✓
P_01617	SILLTEQALAK	LACRT	1	✓
P_01618	SISCQEIPGQQSR	CFP	2	✓
P_01619	SISGAFPGIESK	MMP8	1	✓
P_01620	SISTSLPVLDLIDAIAPNAVR	PLS1	1	✓
P_01621	SIVEEIEDLVAR	RPN2	2	✓
P_01622	SIVVANYEESIK	HPD	2
P_01623	SIVVSPILIPENQR	CDH13	1	✓
P_01624	SLADELALVDVLEDK	LDHB	1
P_01625	SLAPAVVTGK	AQP2
P_01626	SLDADEFR	CAPS	2
P_01627	SLDPSRPVTFVSNSNYAADK	GUSB	1	✓
P_01628	SLEPDTFQGLER	RTN4RL2	1	✓
P_01629	SLEPFTLEILAR	MUC4	1	✓
P_01630	SLEQLQLAR	KERA	2	✓
P_01631	SLETSAFVK	SCPEP1	1	✓
P_01632	SLEVGDNDLVYISHR	LINGO2	2
P_01633	SLGEIPIVESEIK	COPB1	2
P_01634	SLGFCDTTNK	C1QA	2	✓
P_01635	SLGPALLLLQK	MMP9	1	✓
P_01636	SLGTELFK	MYH2
P_01637	SLGVGFATR	FABP3	1
P_01638	SLIAEVLVK	SCGB1D2	2	✓
P_01639	SLIANLAAANCYK	ADK	1	✓
P_01640	SLLAYDLGLTTK	MNDA	1	✓
P_01641	SLLEGEGSSGGGGR	KRT10	2	✓
P_01642	SLLEQYHLGLDQK	GUSB	2	✓
P_01643	SLLVTELGSSR	IMPA1	1	✓
P_01644	SLPLLLSQAGVR	SGSH	1	✓
P_01645	SLQITYSLFR	MILR1	2	✓
P_01646	SLSLLNCEEIK	CD40LG
P_01647	SLTATGGNHVTAR	FLNC	1	✓
P_01648	SLTPDDDVFQYLAHTYASR	CPM	1	✓
P_01649	SNAQGIDLNR	CPE	1	✓
P_01650	SNLAYDIVQLPTGLTGIK	HSPA4	1
P_01651	SNLNSLDEQEGVK	GGCT	1	✓
P_01652	SNVCTLVR	ELANE	2	✓
P_01653	SNVSDAVAQSTR	TPI1	1
P_01654	SNVTLTLR	IL17RA	2	✓
P_01655	SPDGDSSLAASER	MBL2	2	✓
P_01656	SPDVINGSPISQK	CFH	1	✓
P_01657	SPENSLDPK	PI16	1	✓
P_01658	SPIDTFPTDPIK	ACPP	1	✓
P_01659	SPLHYYGNATMSLMNK	ST3GAL6	2
P_01660	SPLNDFQVLR	MST1	2	✓
P_01661	SPPGQVTEAVK	AKR1B1	1	✓
P_01662	SPQGLGAFTPVVR	PTPRS	1	✓
P_01663	SPTNTVTVQGLK	EPHB2	2	✓
P_01664	SQALNAFGSGDYTAAIAFLDK	DNAJC3	1	✓
P_01665	SQAYADYIGFILTLNEGVK	PPP2R4	2	✓
P_01666	SQDILLSVENTVIYR	PROS1	2	✓
P_01667	SQECYFDPELYR	LAMC1	1	✓
P_01668	SQFEGFVK	CD40LG
P_01669	SQFSDKPVQDR	CHID1	2	✓
P_01670	SQHTTEVVGGAPQHEQIGK	ITGA4	2	✓
P_01671	SQIFSTASDNQPTVTIK	HSPA5	2	✓
P_01672	SQLEAIFLR	PLD3	1	✓
P_01673	SQLLCYGLWDHEEDSPSK	PIEZO1	2	✓
P_01674	SQVVAGTNYFIK	CSTB	1	✓
P_01675	SQWNNDNPLFK	ITGB2	2
P_01676	SQYLLTAIHK	SFRP1	1	✓
P_01677	SSAFGTLNWFTK	ANO6	2	✓
P_01678	SSASFNVIEFPYK	ITGAV	2	✓
P_01679	SSCISQHVISEAK	LTBP4	2	✓
P_01680	SSDANLYR	CAMP	2	✓
P_01681	SSDSDESYGEGCIALR	INPP5D	2	✓
P_01682	SSEDPNEDIVER	IGJ	1	✓
P_01683	SSENPNEVFR	USP5	2	✓
P_01684	SSEPTEDVEPK	TGOLN2	2	✓
P_01685	SSFISVLQTSSSSLR	CD82	2	✓
P_01686	SSFYVNGLTLGGQK	PFN1	1	✓
P_01687	SSGLPNIPVQTISR	TFRC	2	✓
P_01688	SSGLVSNAPGVQIR	LCAT	1	✓
P_01689	SSGPTSLFAVTVAPPGAR	HNRNPU	2	✓
P_01690	SSGSLLNNAIK	A2M	1
P_01691	SSLEELHGDANWGEDLR	SUN2	2	✓
P_01692	SSLQPITTLGK	PTK7	2	✓
P_01693	SSNNPHSPIVEEFQVPYNK	C1S	2	✓
P_01694	SSPVEFECINEK	CPNE3	2	✓
P_01695	SSSAGGQGSYVPLLR	LSR	1
P_01696	STDYGIFQINSR	LYZ	1	✓
P_01697	STELCGLWQGR	LCAT	1	✓
P_01698	STEPELIQVK	SLC1A5	2
P_01699	STEYGEGYACDTDLR	UMOD	1	✓
P_01700	STITLDGGVLVHVQK	FABP4	2	✓
P_01701	STLINSLFLTDLYPER	SEPT2	1	✓
P_01702	STSESTAALGCLVK	IGHG2	1
P_01703	STVPTDFSSAK	CD47	2	✓
P_01704	SVACDVGYPALK	ITGA2	2	✓
P_01705	SVAGIGQTGK	SCARB1	2	✓
P_01706	SVLAETEGILQK	KTN1	2	✓
P_01707	SVLAVENLLTLDR	KIF13B	1	✓
P_01708	SVLENHHISSVFR	PDE1B	2	✓
P_01709	SVLGQLGITK	SERPINA1	1	✓
P_01710	SVLQSINPAEPHK	SEMA7A	2	✓
P_01711	SVNDLYIQK	SERPIND1	2	✓
P_01712	SVNPNDTCLASCVK	TSPAN13	2
P_01713	SVQVLAYYTVR	PTPRZ1
P_01714	SWDAINR	PRCP	2	✓
P_01715	SWEDNQQGDEALDTTK	SPOCK2
P_01716	SYEAYVLNIVR	ATP1B1	2
P_01717	SYEPLEDPGVK	TALDO1	1	✓
P_01718	SYHTPGQDK	OR2AJ1
P_01719	SYTIAVASLGK	GLA	1	✓
P_01720	SYTSCCHDFDELCLK	ENPP2	2	✓
P_01721	SYYYAISDFAVGGR	LAMC1	1	✓
P_01722	TAEYDVAYGESHLFR	COL6A1	2	✓
P_01723	TAFDEAIAELDTLSEESYK	YWHAZ	1
P_01724	TAFQEALDAAGDK	TXN	1	✓
P_01725	TALASGGVLDASGDYR	B3GNT1	1	✓
P_01726	TANDAVELHIK	PTGFRN	2	✓
P_01727	TAPYVVTGSVDQTVK	PAFAH1B1	1	✓
P_01728	TAQNLSIFLGSFR	DIAPH1	2	✓
P_01729	TASDAGFPVGSHVQYR	SEZ6L2	2	✓
P_01730	TASNVEEAFINTAK	RAB2A	1	✓
P_01731	TASSVIELTCTK	IGF2R	2	✓
P_01732	TASTNNIAQAR	GNG12	1	✓
P_01733	TAVNALWGK	HBD	2	✓
P_01734	TCLLISYTTNK	CDC42	2	✓
P_01735	TCNPETFPSSNESR	SLC44A2	2	✓
P_01736	TCQDIDECLEQNVHCGPNR	HMCN1	1	✓
P_01737	TCWTTLPQFR	WNT7A
P_01738	TCYEGNGHFYR	PLAU	1	✓
P_01739	TDAPDLPEENQAR	C5	2	✓
P_01740	TDATLSCDVR	PVRL2	1	✓
P_01741	TDDQDIYK	CD2	2	✓
P_01742	TDGAAPNVAPSDVGGGGGR	CNTN1	1	✓
P_01743	TDGSVNFFR	ANGPTL1	1	✓
P_01744	TDTSHHDQDHPTFNK	SERPINA1	1
P_01745	TDTYVTDNGDGTYR	FLNC	1	✓
P_01746	TEATQGLVLWSGK	AGRN	2	✓
P_01747	TEEIFYYYDTNTGK	OLFM4	1	✓
P_01748	TEFWLISAPGEK	ATP6V1C1	1
P_01749	TEHPFTVEEFVLPK	A2M	2	✓
P_01750	TELVAWAVSNWKPDSAR	FUT3	1
P_01751	TENCAVLSGAANGK	CLEC3B	1	✓
P_01752	TENNDADYPWPR	UPK1B	2	✓
P_01753	TEVLPGQLGYLR	RBP3	2	✓
P_01754	TFAHYATFR	FCN3	2	✓
P_01755	TFDQLTPDESK	RCN1	2
P_01756	TFDQLTPEESK	CALU	2
P_01757	TFEVCDLPVR	COPB2	1	✓
P_01758	TFHDLEGNAVK	ERMP1	2	✓
P_01759	TFIAIKPDGVQR	NME2	1
P_01760	TFIEINQIFTK	SLC2A5	2	✓
P_01761	TFTDCFNCLPIAAIVDEK	PPP1CB	1
P_01762	TFYEPGEEITYSCKPGYVSR	APOH	1	✓
P_01763	TGCTDINECEIGAHNCGK	FBN1	2	✓
P_01764	TGDIVEFVCK	CFHR2	2	✓
P_01765	TGEAIVDAALSALR	PDIA6	1
P_01766	TGEVLDTK	FAM3C	2	✓
P_01767	TGIVSGFGR	F10	2	✓
P_01768	TGIYQVLNGSR	LAMP3	2	✓
P_01769	TGQEIPVNVR	CNDP2	1	✓
P_01770	TGYANVTIYK	IL1RL1	2	✓
P_01771	THGFDGLDLAWLYPGR	CHI3L1	2	✓
P_01772	THHDGAITER	CFD	2	✓
P_01773	THPHFVIPYR	APP	2	✓
P_01774	THQELQEFLLK	ZCCHC2
P_01775	THTCPPCPAPELLGGPSVFLFPPKPK	IGHG1	1	✓
P_01776	THVEEGDIVYR	LRRC8A	2	✓
P_01777	TIAEIFGNPNYLR	PSMD5	1	✓
P_01778	TICESSGIWSNPSPICQK	SELL	2	✓
P_01779	TIDDLEDELYAQK	TPM3	2
P_01780	TIDDLEDEVYAQK	TPM2	2
P_01781	TIDDLEEK	TPM4	2	✓
P_01782	TIIVTELSPVVAKPQIK	CEACAM1	1	✓
P_01783	TINEVENQILTR	ACTN4	1
P_01784	TINSDISIPEYK	SCGB2A1	1	✓
P_01785	TIQAEFQCSPGQIVK	NOV	2	✓
P_01786	TIQFVDWCPTGFK	TUBA1A	1
P_01787	TIQVDNTDAEGR	LAP3	1	✓
P_01788	TISFHYLSLPSNLK	FBLN7	1	✓
P_01789	TITLEVEPSDTIENVK	UBB	1
P_01790	TIVFELLTR	PDE1B
P_01791	TIVTTLQDSIR	THBS1	1	✓
P_01792	TLAESALQLLYTAK	TLN1	1	✓
P_01793	TLDLGENQLETLPPDLLR	LRG1	2	✓
P_01794	TLFEDAGYLK	GNPTG	1	✓
P_01795	TLFGLHLSQK	ATIC	1	✓
P_01796	TLFPVVLEQLDDYNAK	LAMA4	2	✓
P_01797	TLFSNIVLSGGSTLFK	ACTR1A	1	✓
P_01798	TLISAHPIIR	TTLL6
P_01799	TLLGDGPVVTDPK	ARHGDIB	1	✓
P_01800	TLLNETPEQIK	PROM1	1	✓
P_01801	TLLSDLVAQYVAK	PLXNB1	2	✓
P_01802	TLNSNDPVQNVVQVLEK	KIF13A	2	✓
P_01803	TLNSSGLPFGSYTFEK	TMEM2	2	✓
P_01804	TLPPLPPGPTPAQQPGR	FAM174A
P_01805	TLQALEFHTVPFQLLAR	LGALS3BP	1	✓
P_01806	TLSDYNIQK	UBB	1
P_01807	TLSQWIAENQDSLGSK	MPI	2	✓
P_01808	TLTLLPLLANNR	SAG
P_01809	TLTLLSVTR	CEACAM1	1
P_01810	TNFFGTR	CBR1	1	✓
P_01811	TNPEDIYPSNPTDDDVSSGSSSER	CD44	2	✓
P_01812	TNQVNSGGVLLR	C1QC	2	✓
P_01813	TNTLLGHLISK	LAMA3
P_01814	TNTNEFLIDVDK	F3	2	✓
P_01815	TPALIALR	AKR1C2	2
P_01816	TPESSPPGTPIGR	CDH6	2	✓
P_01817	TPITLFR	FBLN7	1	✓
P_01818	TPLTATLSK	IGHA1	1	✓
P_01819	TPVIDADKPVSSQLR	DYNC1H1	2	✓
P_01820	TQAYQDQKPGTSGLR	PGM1	1
P_01821	TQDEILFSNSTR	CD109	2	✓
P_01822	TQDNSCSFGLHAR	ST14	2	✓
P_01823	TQDVFTVIR	ENPEP	1	✓
P_01824	TQGFLALFSGDTGEIK	RUVBL2	1	✓
P_01825	TQHFVSAK	FUCA1	2	✓
P_01826	TQPNLDNCPFHDQPHLK	CST3	1	✓
P_01827	TQSSLVPALTDFVR	CUTA	1	✓
P_01828	TSDQIHFFFAK	SERPINC1	1	✓
P_01829	TSLEDFYLDEER	SERPINF1	2
P_01830	TSLENTFIHNTGK	PTPRZ1	2	✓
P_01831	TSLTVVLLR	ICAM3	2	✓
P_01832	TSSAEVTIQNVIK	CD97	2	✓
P_01833	TSSFLDQR	ECE1	2	✓
P_01834	TSTIFLNGNR	TNXB	2	✓
P_01835	TTDVTQTFGIEK	HGFAC	2	✓
P_01836	TTIFSPEGR	PSMA4	1
P_01837	TTINNEYNYR	IGF1R	2	✓
P_01838	TTLSGAPCQPWASEATYR	F12	2	✓
P_01839	TTPPVLDSDGSFFLYSR	IGHG4	1	✓
P_01840	TTQFSCTLGEK	FABP5	2	✓
P_01841	TTQQIDLQGPGPWGFR	PDLIM1	1
P_01842	TTVILPLAPFVR	CHL1	1	✓
P_01843	TVAAPSVFIFPPSDEQLK	IGKC	2	✓
P_01844	TVAEGHGDTLYVGTTR	EML2	2	✓
P_01845	TVEAEAAHGTVTR	IDH1	1	✓
P_01846	TVENFVALATGEK	PPIC	1	✓
P_01847	TVENVTVFGTASASK	VAT1	2	✓
P_01848	TVESITDIR	LAMP1	1	✓
P_01849	TVGAALDILCPSGPIK	GLB1	1	✓
P_01850	TVLWPNGLSLDIPAGR	LRP1	2	✓
P_01851	TVSCVLEDGVETYVK	EMILIN1	2	✓
P_01852	TVSYNGILGPECGTK	TGM2	1	✓
P_01853	TVTATFGYPFR	SYPL1	2	✓
P_01854	TVVAGSSDAAQK	DDAH2	1	✓
P_01855	TVVALCGQR	CD151	2	✓
P_01856	TVVTYHIPQNSSLENVDSR	ICOSLG	2	✓
P_01857	TYIDLIFPDCLAPR	TCN2	2	✓
P_01858	TYLISSIPLQGAFNYK	PIP	1	✓
P_01859	TYLPAVDEK	APOC2	2	✓
P_01860	TYQPWQFFASSK	LAMA5	2	✓
P_01861	VAAALDDGSALGR	TYMP	1	✓
P_01862	VAAIEALNDGELQK	ST13	1
P_01863	VAALGSDLHIEVK	BTN3A3	2	✓
P_01864	VAAVSTHVALGAYAPLTK	IHH	2	✓
P_01865	VAEGTQVLELPFK	SERPINC1	2	✓
P_01866	VAELENSEFR	CD58	1	✓
P_01867	VAEQVLNAVNK	SCPEP1	1	✓
P_01868	VAGYAALLEQYQK	NAPA	1	✓
P_01869	VAHQLQALR	CHGA	2	✓
P_01870	VAIEPGAPR	SORD	2	✓
P_01871	VAIIIPFR	B4GALT1	1	✓
P_01872	VALTGLTVAEYFR	ATP5B	2	✓
P_01873	VANLTFVVNSLDGK	FGL2	2	✓
P_01874	VAPPGLTQIPQIQK	ATP1B1	2	✓
P_01875	VAQFQFQVEDR	FREM2	2	✓
P_01876	VAQLDQLLHYR	CHGB	2	✓
P_01877	VASEALAR	INPP1	2	✓
P_01878	VASLIGVEGGHSIDSSLGVLR	DPEP1	1	✓
P_01879	VAVFFGGLSIK	DDX39B	1	✓
P_01880	VAVQGDVVR	EPRS	2	✓
P_01881	VAVVQYSDR	COL6A3	1	✓
P_01882	VAYDLVYYVR	FCGBP	2	✓
P_01883	VAYLDPLELSEGK	BCAM	1	✓
P_01884	VCEAGSGLVFSCQDK	NGFR	1	✓
P_01885	VDAGEGAQELALLHSK	PVRL4	1	✓
P_01886	VDDNALQCLEEYLR	GCNT3	1	✓
P_01887	VDERPCIDQLLYSQDK	POFUT2	2	✓
P_01888	VDILDPALLR	PSMC3	1	✓
P_01889	VDINTEDLEDGTCR	FLNA	1	✓
P_01890	VDLEDFENNTAYAK	MFAP4	2	✓
P_01891	VDLGGFAGLFDLK	GART	1	✓
P_01892	VDLLNQEIEFLK	KRT2	2	✓
P_01893	VDLPLPPEVWTAALR	NRXN2
P_01894	VDSLVGAGPASR	CD248	1	✓
P_01895	VDSYVEK	SLC39A8
P_01896	VDTQSLDLLSSAAR	PROM2	2	✓
P_01897	VDVFYNGENSPVHK	C12orf65
P_01898	VEAANVHIDPK	CDH11	2	✓
P_01899	VEADIPGHGQEVLIR	MB	2	✓
P_01900	VEAPTTLGDNTAANNVR	VMO1	1	✓
P_01901	VEEEIQTLSQVLAAK	TPD52	2	✓
P_01902	VEGCFNQLLYDIR	TSPAN1	2	✓
P_01903	VEHESFEEPALIPVTLSVR	PVRL2	1	✓
P_01904	VEHSDLSFSK	B2M	2	✓
P_01905	VEHWGLDEPLLK	HLA-DRA	2
P_01906	VEITYTPSDGTQK	IDH1	1	✓
P_01907	VELAPLPSWQPVGK	ICAM1	2	✓
P_01908	VELEDWNGR	FGG	1	✓
P_01909	VELPGTAVPSVPEDAAPASR	SLC12A2	2	✓
P_01910	VFDINLK	MNDA	1	✓
P_01911	VFDVNDK	EFNA5
P_01912	VFEVHVRPK	ICAM2	2	✓
P_01913	VFFASWR	MPO	1	✓
P_01914	VFFTDYGQIPK	LRP1	2	✓
P_01915	VFGFSLITNK	PNP	2	✓
P_01916	VFLENVIR	HIST1H4C	2	✓
P_01917	VFLQGPAPVGTPSFNR	ANKHD1	2	✓
P_01918	VFLTVPSLSSTAEEK	LAMA4	2	✓
P_01919	VFNETPINPR	COPG1	2	✓
P_01920	VFQEPLFYEAPR	CTSL	2	✓
P_01921	VFQFLEK	C5	2	✓
P_01922	VFQYIDLHQDEFVQTLK	CNDP1	2	✓
P_01923	VFSGLVSTGLK	EEF2	1	✓
P_01924	VFSTVFQVPSTK	OR1A1
P_01925	VFVAFQAFLR	ZG16B	1	✓
P_01926	VGALASLIR	CPQ	1	✓
P_01927	VGCPVGDAAR	CEL	1	✓
P_01928	VGDTLNLNLR	C4A	1
P_01929	VGDYGSLSGR	CTSZ	1	✓
P_01930	VGEFSGANK	TXN	2
P_01931	VGELSGDNYLR	IL17RA
P_01932	VGELTNLTQIELR	LRRC8A	2	✓
P_01933	VGFAEAAR	CTSD	1	✓
P_01934	VGGTSDVEVNEK	HSPD1	2
P_01935	VGGVQSLGGTGALR	GOT1	1	✓
P_01936	VGPLLACLLGK	LPO	1	✓
P_01937	VGSGDTNNFPYLEK	NANS	1	✓
P_01938	VGTLDVLVGLSDELAK	ATP6V1C1	1	✓
P_01939	VGVNGFGR	GAPDH	1
P_01940	VHKEDDGVPVICQVEHPAVTGNLQTQR	CADM1	1
P_01941	VHLDIQVGEHANDYAEIAAK	TMED9	2	✓
P_01942	VHLDIQVGEHANNYPEIAAK	TMED4	2	✓
P_01943	VHLIVQVSPK	NTM	2	✓
P_01944	VHLNTFGFFK	GPR107	2	✓
P_01945	VHLSDSER	SDC2	1
P_01946	VHVGDEDFVHLR	CSTB	1	✓
P_01947	VHVIFNYK	CALR	2	✓
P_01948	VHVVFSTER	RARRES1	2	✓
P_01949	VIAGQFFGHHHTDSFR	SMPDL3B	2	✓
P_01950	VIALINDQR	APLP1	2	✓
P_01951	VIAVNEVGR	CHL1	1	✓
P_01952	VIEEFYNQTWVHR	SLC2A1	2	✓
P_01953	VIELENWTEGK	ECHDC1	1	✓
P_01954	VIGGDDLSTLTGK	HPRT1	1	✓
P_01955	VIGSGCNLDSAR	LDHB	1
P_01956	VIPGPPALTLVPAELVR	CSF1R	2	✓
P_01957	VIQCFAETGQVQK	CLTC	1	✓
P_01958	VIQDCEDENIQR	ITGA1	2	✓
P_01959	VITEPIPVSDLR	PTPRJ	1	✓
P_01960	VKPQLEEK	CSTA	1	✓
P_01961	VLAKPQNTAEVQK	PVR	1	✓
P_01962	VLALLDVPDK	IMPAD1	2	✓
P_01963	VLATLCGQESTDTER	MASP2	1	✓
P_01964	VLCDDVICDETK	COL1A1	2	✓
P_01965	VLCGGDIYVPEDPK	ALDH9A1	1	✓
P_01966	VLDALQAIK	CA1	2	✓
P_01967	VLDFHNLPDGITK	COL5A1	2	✓
P_01968	VLEACSIACNK	SHMT1	1	✓
P_01969	VLEAVNGTDAR	MPZL2	2	✓
P_01970	VLEDGTPFWSGPK	UBA7	2	✓
P_01971	VLEDNSALDK	DPP4	1	✓
P_01972	VLFETDLVNPR	NID1	2	✓
P_01973	VLGATLLPDLIQK	NPEPPS	1	✓
P_01974	VLHGDLIDFVCK	F13B	2	✓
P_01975	VLHNGTLAELQGLPHIR	TPBG	2	✓
P_01976	VLIAAHGNSLR	PGAM2	2
P_01977	VLITKTLGK	SCGB1D1	1	✓
P_01978	VLITTDLLAR	EIF4A1	1
P_01979	VLLAPLGDDFR	MAN2A1	1	✓
P_01980	VLMEKELPGFLQSGK	S100P	1
P_01981	VLNVPLCK	FOLR1	1	✓
P_01982	VLPGDYEILATHPTWALK	NOMO3	2
P_01983	VLPVGDEVVGIVGYTSK	NT5E	2	✓
P_01984	VLQENNEGLR	KIF20B	2	✓
P_01985	VLSALQAVQGLLVAQGR	AGT	1	✓
P_01986	VLSLAQEQVGGSPEK	C4A	1
P_01987	VLSNTEDLPLVTK	LYNX1	1
P_01988	VLSSIEQK	SFN	2	✓
P_01989	VLTSGIFETK	GNAS	2
P_01990	VLVTGATGLLGR	MAT2B	1	✓
P_01991	VLYLSAFTSK	THY1	1	✓
P_01992	VNDVNEFAPVFVER	CLSTN3
P_01993	VNESSLNWPQLENIGNFIK	CNN3	2	✓
P_01994	VNHAVLAVGYGEK	CTSH	2	✓
P_01995	VNHVTLSQPK	B2M	1	✓
P_01996	VNIIPLIAK	SEPT7	1
P_01997	VNLAELFK	PRDX5	2
P_01998	VNPTVFFDIAVDGEPLGR	PPIA	1
[truncated: 208 more rows]

## Sheet: Table S3 
Table S3. List of Self-Designed QconCATproteins
QconCAT ID	Amino Acid Sequence	Molecular Weight	Peptide Sequence	Peptide #	Targeted Proteins
1	MGHHHHHHLEAARGYSFTTTAEKAHFSISNSAEDPFIAIHAESKGHGAGGASILTFWDARNLVLHSARPGAPPPQPLDLQHRLVSEDPINDGEWHRSTSESTAALGCLVKVVSVLTVVHQDWLNGKAQIINDAFNLASAHKDNEETGFGSGTRSVLGQLGITKTDTSHHDQDHPTFNKDSTIQVVENGESSQGRSTEYGEGYACDTDLR	22617	AHFSISNSAEDPFIAIHAESK	P_00082	AMY1A
			GHGAGGASILTFWDAR	P_00704	AMY1A
			NLVLHSARPGAPPPQPLDLQHR	P_01425	HSPG2
			LVSEDPINDGEWHR	P_01342	HSPG2
			STSESTAALGCLVK	P_01702	IGHG2
			VVSVLTVVHQDWLNGK	P_02067	IGHG2
			AQIINDAFNLASAHK	P_00161	ANPEP
			DNEETGFGSGTR	P_00353	ANPEP
			SVLGQLGITK	P_01709	SERPINA1
			TDTSHHDQDHPTFNK	P_01744	SERPINA1
			DSTIQVVENGESSQGR	P_00379	UMOD
			STEYGEGYACDTDLR	P_01699	UMOD
2	MGHHHHHHLEAARGYSFTTTAEKSAVTGSCVNDGVHIIRDGVDSDAPILSKTAEYDVAYGESHLFRGLEQLLVGGSHLKAQPVQVAEGSEPDGFWEALGGKAGALNSNDAFVLKDLYSGLIGPLIVCRLISVDTEHSNIYLQNGPDRLKELTLEDLKAFPALTSLDLSDNPGLGERVGDTLNLNLRVLSLAQEQVGGSPEK	21491.9	SAVTGSCVNDGVHIIR	P_01548	CUBN
			DGVDSDAPILSK	P_00311	CUBN
			TAEYDVAYGESHLFR	P_01722	COL6A1
			GLEQLLVGGSHLK	P_00730	COL6A1
			AQPVQVAEGSEPDGFWEALGGK	P_00166	GSN
			AGALNSNDAFVLK	P_00063	GSN
			DLYSGLIGPLIVCR	P_00352	CP
			LISVDTEHSNIYLQNGPDR	P_01199	CP
			LKELTLEDLK	P_01204	CD14
			AFPALTSLDLSDNPGLGER	P_00056	CD14
			VGDTLNLNLR	P_01928	C4A
			VLSLAQEQVGGSPEK	P_01986	C4A
3	MGHHHHHHLEAARGYSFTTTAEKHCETCISGFYGDPTNGGKEQYAVVGHSAHIVTLKCPLLVDSEGWVKNADLQVLKPEPELVYEDLRDNFHGLAIFLDTYPNDETTERDHDTFLAVRAGYIIPLQGPGLTTTESRVTSEGAGLQLQKQGPVNLLSDPEQGVEVTGQYERVQGNDHSATRDFTCVHQALKFQPTLLTLPR	22143.9	HCETCISGFYGDPTNGGK	P_00842	ATRN
			EQYAVVGHSAHIVTLK	P_00488	ATRN
			CPLLVDSEGWVK	P_00247	PIGR
			NADLQVLKPEPELVYEDLR	P_01363	PIGR
			DNFHGLAIFLDTYPNDETTER	P_00356	LMAN2
			DHDTFLAVR	P_00316	LMAN2
			AGYIIPLQGPGLTTTESR	P_00081	GAA
			VTSEGAGLQLQK	P_02044	GAA
			QGPVNLLSDPEQGVEVTGQYER	P_01500	ITIH4
			VQGNDHSATR	P_02014	ITIH4
			DFTCVHQALK	P_00295	SERPING1
			FQPTLLTLPR	P_00592	SERPING1
4	MGHHHHHHLEAARGYSFTTTAEKTLQALEFHTVPFQLLARASHEEVEGLVEKLGVRPSQGGEAPRDDKESVPISDTIIPAVPPPTDLRVLEDNSALDKAGAVNPTVKIEHSTFDGLDRVTLITENLGHPRDEELSCTVVELKITLLSALVETRALAAKPGLDTYSLGGGGAARYGVSHPDAGAAWR	19948.2	TLQALEFHTVPFQLLAR	P_01805	LGALS3BP
			ASHEEVEGLVEK	P_00175	LGALS3BP
			LGVRPSQGGEAPR	P_01177	FN1
			DDKESVPISDTIIPAVPPPTDLR	P_00281	FN1
			VLEDNSALDK	P_01971	DPP4
			AGAVNPTVK	P_00064	DPP4
			IEHSTFDGLDR	P_00946	LRP2
			VTLITENLGHPR	P_02038	LRP2
			DEELSCTVVELK	P_00286	SERPINA3
			ITLLSALVETR	P_01055	SERPINA3
			ALAAKPGLDTYSLGGGGAAR	P_00099	NAGLU
			YGVSHPDAGAAWR	P_02141	NAGLU
5	MGHHHHHHLEAARGYSFTTTAEKVTSIQDWVQKDGDLVDWWTQQSASNFKIGYPDDIVSNDNKHLSLLTTLSNRVEAANVHIDPKDPDAANSPIRTLDLGENQLETLPPDLLRNALTGLPPGLFQASATLDTLVLKLSGLHGQDLFGIWSKELSELSLLSLYGIHKEVVSLTEACCAEGADPDCYDTRSCAVAEYGVYVK	21951.9	VTSIQDWVQK	P_02045	HP
			DGDLVDWWTQQSASNFK	P_00299	MME
			IGYPDDIVSNDNK	P_00970	MME
			HLSLLTTLSNR	P_00877	GC
			VEAANVHIDPK	P_01898	CDH11
			DPDAANSPIR	P_00361	CDH11
			TLDLGENQLETLPPDLLR	P_01793	LRG1
			NALTGLPPGLFQASATLDTLVLK	P_01367	LRG1
			LSGLHGQDLFGIWSK	P_01291	ACPP
			ELSELSLLSLYGIHK	P_00467	ACPP
			EVVSLTEACCAEGADPDCYDTR	P_00507	GC
			SCAVAEYGVYVK	P_01549	HP
6	MGHHHHHHLEAARGYSFTTTAEKGFQQLLQELNQPRAAAATGTIFTFRLLDLYSAGEQRGAPALLTCVNRTHTCPPCPAPELLGGPSVFLFPPKPKADDTAVYYCARAGAAAGGPGVSGVCVCKGEGEPCGGGGAGRAYVAVDGIPQGVLERTVGAALDILCPSGPIKVLATLCGQESTDTERLASPGFPGEYANDQER	20603.1	GFQQLLQELNQPR	P_00687	SERPINA5
			AAAATGTIFTFR	P_00001	SERPINA5
			LLDLYSAGEQR	P_01212	MXRA8
			GAPALLTCVNR	P_00645	MXRA8
			THTCPPCPAPELLGGPSVFLFPPKPK	P_01775	IGHG1
			ADDTAVYYCAR	P_00030	IGHG1
			AGAAAGGPGVSGVCVCK	P_00062	IGFBP7
			GEGEPCGGGGAGR	P_00665	IGFBP7
			AYVAVDGIPQGVLER	P_00222	GLB1
			TVGAALDILCPSGPIK	P_01849	GLB1
			VLATLCGQESTDTER	P_01963	MASP2
			LASPGFPGEYANDQER	P_01104	MASP2
7	MGHHHHHHLEAARGYSFTTTAEKEYVQLISVYEKTEEIFYYYDTNTGKIQCAAGYEQSEHNVCQDIDECTAGTHNCRDIDECDIVPDACKIFFHLNAVALGDGGHYTCRVTLTCVAPLSGVDFQLRAFQNVFAPRNFNIHGTNKLLQDEFPGIPSPLDAAVECHRSGAQATWTELPWPHEKGQVPENEANVVITTLKNTGVISVVTTGLDR	23464.2	EYVQLISVYEK	P_00514	OLFM4
			TEEIFYYYDTNTGK	P_01747	OLFM4
			IQCAAGYEQSEHNVCQDIDECTAGTHNCR	P_01029	EFEMP1
			DIDECDIVPDACK	P_00322	EFEMP1
			IFFHLNAVALGDGGHYTCR	P_00950	A1BG
			VTLTCVAPLSGVDFQLR	P_02040	A1BG
			AFQNVFAPR	P_00057	GNS
			NFNIHGTNK	P_01382	GNS
			LLQDEFPGIPSPLDAAVECHR	P_01234	HPX
			SGAQATWTELPWPHEK	P_01589	HPX
			GQVPENEANVVITTLK	P_00780	CDH1
			NTGVISVVTTGLDR	P_01463	CDH1
8	MGHHHHHHLEAARGYSFTTTAEKYVGGQEHFAHLLILREQLGEFYEALDCLRHLVLACHYDSKYPGSPGSYAARGGGALLGDREACNAWLQKETNLLYDPKTQDVFTVIRDHDVYTGNCAHYQKYHGNAGDSFTWHNGKFFNVLTTNTDGKYPVYGVQWHPEK	18525.9	YVGGQEHFAHLLILR	P_02196	ORM1
			EQLGEFYEALDCLR	P_00484	ORM1
			HLVLACHYDSK	P_00879	QPCT
			YPGSPGSYAAR	P_02170	QPCT
			GGGALLGDR	P_00690	C1RL
			EACNAWLQK	P_00411	C1RL
			ETNLLYDPK	P_00499	ENPEP
			TQDVFTVIR	P_01823	ENPEP
			DHDVYTGNCAHYQK	P_00317	ANGPTL2
			YHGNAGDSFTWHNGK	P_02142	ANGPTL2
			FFNVLTTNTDGK	P_00540	GGH
			YPVYGVQWHPEK	P_02171	GGH
9	MGHHHHHHLEAARGYSFTTTAEKEIYCPAPPQIDNGIIQGERQSVTYACNKAGLLRPDYALLGHRGCPDVQASLPDAKLGFRPAEDDPHRVDSLVGAGPASRAQWANPFDPSKNALALFVLPKIGAEVYHNLKAVEHINKAVVVHAGEDDLGRGGNQASVENGNAGR	17911.9	EIYCPAPPQIDNGIIQGER	P_00451	CD55
			QSVTYACNK	P_01519	CD55
			AGLLRPDYALLGHR	P_00071	PGLYRP2
			GCPDVQASLPDAK	P_00650	PGLYRP2
			LGFRPAEDDPHR	P_01164	CD248
			VDSLVGAGPASR	P_01894	CD248
			AQWANPFDPSK	P_00170	SERPINA7
			NALALFVLPK	P_01366	SERPINA7
			IGAEVYHNLK	P_00955	ENO1
			AVEHINK	P_00199	ENO1
			AVVVHAGEDDLGR	P_00214	SOD3
			GGNQASVENGNAGR	P_00693	SOD3
10	MGHHHHHHLEAARGYSFTTTAEKAPRPAPGGAEQRFFYAGTPPAGLAADSHVKLVDQNIFSFYLSRVGFAEAARLHQYDGSIVVIQNPAREQAVEGGEVELSCLVPRVIGSGCNLDSARSLADELALVDVLEDKLALASLGYEKLLDEEEATDNDLRVLSALQAVQGLLVAQGRALQDQLVLVAAK	19939.2	APRPAPGGAEQR	P_00156	ENDOD1
			FFYAGTPPAGLAADSHVK	P_00544	ENDOD1
			LVDQNIFSFYLSR	P_01321	CTSD
			VGFAEAAR	P_01933	CTSD
			LHQYDGSIVVIQNPAR	P_01186	CADM4
			EQAVEGGEVELSCLVPR	P_00481	CADM4
			VIGSGCNLDSAR	P_01955	LDHB
			SLADELALVDVLEDK	P_01624	LDHB
			LALASLGYEK	P_01095	PDCD6IP
			LLDEEEATDNDLR	P_01210	PDCD6IP
			VLSALQAVQGLLVAQGR	P_01985	AGT
			ALQDQLVLVAAK	P_00128	AGT
11	MGHHHHHHLEAARGYSFTTTAEKLYQQHGAGLFDVTRLFGGNFAHQASVARDIQGSLQDIFKSIVVSPILIPENQRYGDSGEQIAGFVKDLECVTNLQEVARAAQGLLACGVAQGALRALASECAQHLSLPLRAGLQVYNKENELTYYCCKHIQPGAFDTLDRLAGLGLQQLDEGLFSR	19546.8	LYQQHGAGLFDVTR	P_01357	TPP1
			LFGGNFAHQASVAR	P_01141	TPP1
			DIQGSLQDIFK	P_00328	CDH13
			SIVVSPILIPENQR	P_01623	CDH13
			YGDSGEQIAGFVK	P_02131	CTSA
			DLECVTNLQEVAR	P_00334	CTSA
			AAQGLLACGVAQGALR	P_00017	PGLYRP1
			ALASECAQHLSLPLR	P_00102	PGLYRP1
			AGLQVYNK	P_00072	CD59
			ENELTYYCCK	P_00472	CD59
			HIQPGAFDTLDR	P_00867	VASN
			LAGLGLQQLDEGLFSR	P_01090	VASN
12	MGHHHHHHLEAARGYSFTTTAEKACDGINDCGDQSDELCCKCIEGTCVCKTDGAAPNVAPSDVGGGGGRVQVTSQEYSARLAVTTHGLPCLAWASAQAKSGIECQLWRCQLQVQGEPPEVHWLRLGSLHPHTPYHIRTFYEPGEEITYSCKPGYVSRCPFPSRPDNGFVNYPAKPTLYYKDYVSQFEGSALGKATEHLSTLSEK	22285.5	ACDGINDCGDQSDELCCK	P_00023	CFI
			CIEGTCVCK	P_00233	CFI
			TDGAAPNVAPSDVGGGGGR	P_01742	CNTN1
			VQVTSQEYSAR	P_02020	CNTN1
			LAVTTHGLPCLAWASAQAK	P_01106	F2
			SGIECQLWR	P_01598	F2
			CQLQVQGEPPEVHWLR	P_00250	AXL
			LGSLHPHTPYHIR	P_01173	AXL
			TFYEPGEEITYSCKPGYVSR	P_01762	APOH
			CPFPSRPDNGFVNYPAKPTLYYK	P_00244	APOH
			DYVSQFEGSALGK	P_00407	APOA1
			ATEHLSTLSEK	P_00186	APOA1
13	MGHHHHHHLEAARGYSFTTTAEKNILTSNNIDVKCPNPPVQENFDVNKGHAHDGQALSTDLGVYTCEASNRGPDSNVLLLRNNQIDHIDEKLKEDAVSAAFKIADQCPSSLAIQENANALARELSEIAQSIVANGKLIVHNGYCDGRDPNGLPPEAQKGSLLLGGLDAEASRGVLSYLEPR	19495.6	NILTSNNIDVK	P_01405	APOD
			CPNPPVQENFDVNK	P_00248	APOD
			GHAHDGQALSTDLGVYTCEASNR	P_00702	ROBO4
			GPDSNVLLLR	P_00763	ROBO4
			NNQIDHIDEK	P_01433	LUM
			LKEDAVSAAFK	P_01203	LUM
			IADQCPSSLAIQENANALAR	P_00914	ALDOB
			ELSEIAQSIVANGK	P_00466	ALDOB
			LIVHNGYCDGR	P_01202	RBP4
			DPNGLPPEAQK	P_00362	RBP4
			GSLLLGGLDAEASR	P_00794	CSPG4
			GVLSYLEPR	P_00823	CSPG4
14	MGHHHHHHLEAARGYSFTTTAEKTCQDIDECLEQNVHCGPNRDPVSGFCLKIDQNVEELKLGEVNTYAGDLQKAKPSAPVVSGPAVRSGAGTELSVRILEDQEENPLPAALVQPHTGKLPIPESQVITINPELPVEEAAEDYAKTENCAVLSGAANGKLDTLAQEVALLKLGLLGDSVDIFKVGCPVGDAAR	20407.2	TCQDIDECLEQNVHCGPNR	P_01736	HMCN1
			DPVSGFCLK	P_00364	HMCN1
			IDQNVEELK	P_00932	APOA4
			LGEVNTYAGDLQK	P_01160	APOA4
			AKPSAPVVSGPAVR	P_00097	SIRPB1
			SGAGTELSVR	P_01588	SIRPB1
			ILEDQEENPLPAALVQPHTGK	P_00994	PGLS
			LPIPESQVITINPELPVEEAAEDYAK	P_01258	PGLS
			TENCAVLSGAANGK	P_01751	CLEC3B
			LDTLAQEVALLK	P_01120	CLEC3B
			LGLLGDSVDIFK	P_01168	CEL
			VGCPVGDAAR	P_01927	CEL
15	MGHHHHHHLEAARGYSFTTTAEKDAQEVHCDEATKSHLIIAQVAKVTVEDKDLVNTANWRGPGVDQEPRTNPEDIYPSNPTDDDVSSGSSSERALSIGFETCRLLVSASQDGKAGVLAGHDNRCFLGCELPPEGSRHISAENTKLALLVDTVGPRVGALASLIR	17618.7	DAQEVHCDEATK	P_00268	BTD
			SHLIIAQVAK	P_01605	BTD
			VTVEDKDLVNTANWR	P_02048	DSC2
			GPGVDQEPR	P_00769	DSC2
			TNPEDIYPSNPTDDDVSSGSSSER	P_01811	CD44
			ALSIGFETCR	P_00133	CD44
			LLVSASQDGK	P_01240	GNB1
			AGVLAGHDNR	P_00079	GNB1
			CFLGCELPPEGSR	P_00231	PROCR
			HISAENTK	P_00868	PROCR
			LALLVDTVGPR	P_01098	CPQ
			VGALASLIR	P_01926	CPQ
16	MGHHHHHHLEAARGYSFTTTAEKLSGVEDGHQRFTGSLQQLTVHPDPRVAVVQYSDRATYHGSFSTKAGIAHLYGIAGSTNVTGDQVKAPVILGSPDDVLEFLKELQNLIQELQQARLLPVQENFLLKRPYQEGTPCSQCPSGYHCKSPENSLDPKNLDENYCRHSIFTPETNPR	19488.6	LSGVEDGHQR	P_01294	COL15A1
			FTGSLQQLTVHPDPR	P_00607	COL15A1
			VAVVQYSDR	P_01881	COL6A3
			ATYHGSFSTK	P_00195	COL6A3
			AGIAHLYGIAGSTNVTGDQVK	P_00070	FBP1
			APVILGSPDDVLEFLK	P_00158	FBP1
			ELQNLIQELQQAR	P_00465	CALB1
			LLPVQENFLLK	P_01232	CALB1
			RPYQEGTPCSQCPSGYHCK	P_01538	PI16
			SPENSLDPK	P_01657	PI16
			NLDENYCR	P_01414	PLG
			HSIFTPETNPR	P_00891	PLG
17	MGHHHHHHLEAARGYSFTTTAEKGGGHILPYDQPLRSDSEVAGYIRDIQAAGGIVTAEDLNNYRNIDQAVTAALETRVAEGTQVLELPFKTSDQIHFFFAKDFAEHLLIPRAPDLQDLPWQVKDAGTIAGLNVLRFEELNADLFRLLDNLNQDAPDTYHYVVSEPLGRDSHLTAVGK	19668.9	GGGHILPYDQPLR	P_00691	CPVL
			SDSEVAGYIR	P_01563	CPVL
			DIQAAGGIVTAEDLNNYR	P_00326	GGT1
			NIDQAVTAALETR	P_01399	GGT1
			VAEGTQVLELPFK	P_01865	SERPINC1
			TSDQIHFFFAK	P_01828	SERPINC1
			DFAEHLLIPR	P_00288	PROZ
			APDLQDLPWQVK	P_00149	PROZ
			DAGTIAGLNVLR	P_00264	HSPA8
			FEELNADLFR	P_00531	HSPA8
			LLDNLNQDAPDTYHYVVSEPLGR	P_01213	DNASE1
			DSHLTAVGK	P_00374	DNASE1
18	MGHHHHHHLEAARGYSFTTTAEKTVEAEAAHGTVTRATDFVVPGPGKGQFETYLRHPFFLDDRGQSEDPGSLLSLFRLLTSFLPAQLLRGGLPLEEVTVAEVLAARQSLFFYPSYPDEVRSLDPSRPVTFVSNSNYAADKSLLEQYHLGLDQKATPQHTVSFTCESHGFSPRVPPTLEVTQQPVR	20529.3	TVEAEAAHGTVTR	P_01845	IDH1
			ATDFVVPGPGK	P_00184	IDH1
			GQFETYLR	P_00775	ASAH1
			HPFFLDDR	P_00883	ASAH1
			GQSEDPGSLLSLFR	P_00779	SLC3A2
			LLTSFLPAQLLR	P_01237	SLC3A2
			GGLPLEEVTVAEVLAAR	P_00692	ARSA
			QSLFFYPSYPDEVR	P_01518	ARSA
			SLDPSRPVTFVSNSNYAADK	P_01627	GUSB
			SLLEQYHLGLDQK	P_01642	GUSB
			ATPQHTVSFTCESHGFSPR	P_00193	SIRPA
			VPPTLEVTQQPVR	P_02009	SIRPA
19	MGHHHHHHLEAARGYSFTTTAEKHSQPWQVLVASRLSEPAELTDAVKGNDISSGTVLSDYVGSGPPKLYTLVLTDPDAPSRSGSAHEYSSSPDDAIFQSLARSNAQGIDLNRDVNDNPPTLDVASLREAIDPALEGRVPSEGAYDIILPRGVGYETILKALDFAVGEYNKTQPNLDNCPFHDQPHLK	20266	HSQPWQVLVASR	P_00893	KLK3
			LSEPAELTDAVK	P_01288	KLK3
			GNDISSGTVLSDYVGSGPPK	P_00748	PEBP1
			LYTLVLTDPDAPSR	P_01360	PEBP1
			SGSAHEYSSSPDDAIFQSLAR	P_01601	CPE
			SNAQGIDLNR	P_01649	CPE
			DVNDNPPTLDVASLR	P_00389	CDHR2
			EAIDPALEGR	P_00416	CDHR2
			VPSEGAYDIILPR	P_02010	GPRC5C
			GVGYETILK	P_00819	GPRC5C
			ALDFAVGEYNK	P_00105	CST3
			TQPNLDNCPFHDQPHLK	P_01826	CST3
20	MGHHHHHHLEAARGYSFTTTAEKEENFYVDETTVVKGTWTQPFDLASTRVEHESFEEPALIPVTLSVRTDATLSCDVRLGALGGNTQEVTLQPGEYITKYFSTTEDYDHEITGLRGTLLAFAEARYGSGVSGIPYGQPKGLGDDTALNDARVEAPTTLGDNTAANNVRGTGLTAVAVQEGNSDVVEVRIPFTVSLDNGHSFPR	21953.7	EENFYVDETTVVK	P_00432	SERPINA6
			GTWTQPFDLASTR	P_00810	SERPINA6
			VEHESFEEPALIPVTLSVR	P_01903	PVRL2
			TDATLSCDVR	P_01740	PVRL2
			LGALGGNTQEVTLQPGEYITK	P_01153	ZG16B
			YFSTTEDYDHEITGLR	P_02128	ZG16B
			GTLLAFAEAR	P_00805	NEU1
			YGSGVSGIPYGQPK	P_02140	NEU1
			GLGDDTALNDAR	P_00732	VMO1
			VEAPTTLGDNTAANNVR	P_01900	VMO1
			GTGLTAVAVQEGNSDVVEVR	P_00802	SUSD2
			IPFTVSLDNGHSFPR	P_01026	SUSD2
21	MGHHHHHHLEAARGYSFTTTAEKSAGDVDTLAFDGRTEATQGLVLWSGKYRPLILDQWQHVELSDGTAHTITDAYAGKHSPQEAPHVQYERDQLVIPDGQEEEQEAAGEGRLQQDVLQFQKCQGPPGVDLYRYGFDQFALYKNGEEFSFLKAQLVEEWANSVKWKDVPCEDKISCPEGTNAYR	20662.9	SAGDVDTLAFDGR	P_01542	AGRN
			TEATQGLVLWSGK	P_01746	AGRN
			YRPLILDQWQHVELSDGTAHTITDAYAGK	P_02177	CNTFR
			HSPQEAPHVQYER	P_00892	CNTFR
			DQLVIPDGQEEEQEAAGEGR	P_00367	GOLM1
			LQQDVLQFQK	P_01275	GOLM1
			CQGPPGVDLYR	P_00249	GP6
			YGFDQFALYK	P_02133	GP6
			NGEEFSFLK	P_01391	SERPINI1
			AQLVEEWANSVK	P_00164	SERPINI1
			WKDVPCEDK	P_02093	REG1A
			ISCPEGTNAYR	P_01041	REG1A
22	MGHHHHHHLEAARGYSFTTTAEKLGDVYVNDAFGTAHRACANPAAGSVILLENLRGHDSTEEPPLFSSHKPRAGVFSDLSNQELKSQECYFDPELYRSYYYAISDFAVGGRCLAEGAGDVAFVKADTDGGLIFRGCSFLPDPYQKLVGYLDRDQSGEYECSALNDVAAPDVRITVNYPPYISK	20087.6	LGDVYVNDAFGTAHR	P_01155	PGK1
			ACANPAAGSVILLENLR	P_00022	PGK1
			GHDSTEEPPLFSSHKPR	P_00703	AOC1
			AGVFSDLSNQELK	P_00078	AOC1
			SQECYFDPELYR	P_01667	LAMC1
			SYYYAISDFAVGGR	P_01721	LAMC1
			CLAEGAGDVAFVK	P_00237	MFI2
			ADTDGGLIFR	P_00038	MFI2
			GCSFLPDPYQK	P_00651	PSAP
			LVGYLDR	P_01330	PSAP
			DQSGEYECSALNDVAAPDVR	P_00369	OPCML
			ITVNYPPYISK	P_01060	OPCML
23	MGHHHHHHLEAARGYSFTTTAEKVAEQVLNAVNKSLETSAFVKLLGLSLAGKNGVGVLIWKELGICPDDAAVIPIKTYLISSIPLQGAFNYKDGWQLQVQGGVAQLVIKAFLASPEYVNLPINGNGKASCLYGQLPKHSAQPWADFTLLGARFGLFKPGEIAPLLFRVVQDAQTFAEWKINQDPLGIQGR	20628.9	VAEQVLNAVNK	P_01867	SCPEP1
			SLETSAFVK	P_01631	SCPEP1
			LLGLSLAGK	P_01223	LYVE1
			NGVGVLIWK	P_01395	LYVE1
			ELGICPDDAAVIPIK	P_00457	PIP
			TYLISSIPLQGAFNYK	P_01858	PIP
			DGWQLQVQGGVAQLVIK	P_00314	SECTM1
			AFLASPEYVNLPINGNGK	P_00053	GSTP1
			ASCLYGQLPK	P_00173	GSTP1
			HSAQPWADFTLLGAR	P_00888	OSCAR
			FGLFKPGEIAPLLFR	P_00548	OSCAR
			VVQDAQTFAEWK	P_02066	NAGA
			INQDPLGIQGR	P_01018	NAGA
24	MGHHHHHHLEAARGYSFTTTAEKISGQEVNEAACDIARQVADEGDALVAGGVSQTPSYLSCKAVQQPDGLAVLGIFLKVVDVLDSIKGPVLQLHDLKGATLALTQVTPQDERSLTPDDDVFQYLAHTYASRENYNQYDLNRQSGQCLDIDECRCEEPYLRSLEPDTFQGLERLLTEHVFR	19982.8	ISGQEVNEAACDIAR	P_01042	BHMT
			QVADEGDALVAGGVSQTPSYLSCK	P_01526	BHMT
			AVQQPDGLAVLGIFLK	P_00210	CA2
			VVDVLDSIK	P_02055	CA2
			GPVLQLHDLK	P_00771	MCAM
			GATLALTQVTPQDER	P_00646	MCAM
			SLTPDDDVFQYLAHTYASR	P_01648	CPM
			ENYNQYDLNR	P_00478	CPM
			QSGQCLDIDECR	P_01517	FBLN5
			CEEPYLR	P_00229	FBLN5
			SLEPDTFQGLER	P_01628	RTN4RL2
			LLTEHVFR	P_01236	RTN4RL2
25	MGHHHHHHLEAARGYSFTTTAEKVHKEDDGVPVICQVEHPAVTGNLQTQRSDDSVIQLLNPNRTISFHYLSLPSNLKTPITLFRGILAADESTGSIAKALANSLACQGKAPDPGFQERDVTADFEGQSPKVIAVNEVGRTTVILPLAPFVRLSYEGEVTKTSLEDFYLDEER	18877.5	VHKEDDGVPVICQVEHPAVTGNLQTQR	P_01940	CADM1
			SDDSVIQLLNPNR	P_01552	CADM1
			TISFHYLSLPSNLK	P_01788	FBLN7
			TPITLFR	P_01817	FBLN7
			GILAADESTGSIAK	P_00715	ALDOA
			ALANSLACQGK	P_00101	ALDOA
			APDPGFQER	P_00150	DPP7
			DVTADFEGQSPK	P_00392	DPP7
			VIAVNEVGR	P_01951	CHL1
			TTVILPLAPFVR	P_01842	CHL1
			LSYEGEVTK	P_01302	SERPINF1
			TSLEDFYLDEER	P_01829	SERPINF1
26	MGHHHHHHLEAARGYSFTTTAEKDSTGHVGFIFKFGDQVLQINGENCAGWSSDKGAVSQTYPSGTCAYIQRCLSLDAKGLSTESILIPRNNLEALEDFEKVASLIGVEGGHSIDSSLGVLRAVGFGGDFDGVPRFDGGVEAIATRHEFEEAKFEDGVLDPDYPRDVWGIEGPIDAAFTR	19314.3	DSTGHVGFIFK	P_00378	SDCBP
			FGDQVLQINGENCAGWSSDK	P_00546	SDCBP
			GAVSQTYPSGTCAYIQR	P_00649	OLR1
			CLSLDAK	P_00240	OLR1
			GLSTESILIPR	P_00744	LCN1
			NNLEALEDFEK	P_01431	LCN1
			VASLIGVEGGHSIDSSLGVLR	P_01878	DPEP1
			AVGFGGDFDGVPR	P_00203	DPEP1
			FDGGVEAIATR	P_00525	MAN1A1
			HEFEEAK	P_00849	MAN1A1
			FEDGVLDPDYPR	P_00529	VTN
			DVWGIEGPIDAAFTR	P_00396	VTN
27	MGHHHHHHLEAARGYSFTTTAEKSLPLLLSQAGVRVLAKPQNTAEVQKVLNVPLCKNVDGVNYASITRVGDYGSLSGRVWFELTQGSITKEAEPLVDIRIHAENAIRNQAVNFLRGILTVDELLAIRCNSLSTLEKNPLDGSVLLRVDAGEGAQELALLHSK	17655.3	SLPLLLSQAGVR	P_01644	SGSH
			VLAKPQNTAEVQK	P_01961	PVR
			VLNVPLCK	P_01981	FOLR1
			NVDGVNYASITR	P_01467	CTSZ
			VGDYGSLSGR	P_01929	CTSZ
			VWFELTQGSITK	P_02072	MMRN2
			EAEPLVDIR	P_00412	MMRN2
			IHAENAIR	P_00971	CHMP1B
			NQAVNFLR	P_01444	CHMP1B
			GILTVDELLAIR	P_00718	LAMP2
			CNSLSTLEK	P_00242	LAMP2
			NPLDGSVLLR	P_01439	PVRL4
			VDAGEGAQELALLHSK	P_01885	PVRL4
28	MGHHHHHHLEAARGYSFTTTAEKVGGVQSLGGTGALRLALGDDSPALKLLGCAVLAPRNPAATCVDLQLRFGVYDIDNKSSPVEFECINEKLVEGEVYAVDERFLDDFESCPALYQRETEVIDPQDLLEGRAGSGSQVPTEPKNVHGINFVSPVRVVVYLQK	17603.8	VGGVQSLGGTGALR	P_01935	GOT1
			LALGDDSPALK	P_01096	GOT1
			LLGCAVLAPR	P_01220	CPZ
			NPAATCVDLQLR	P_01434	CPZ
			FGVYDIDNK	P_00551	CPNE3
			SSPVEFECINEK	P_01694	CPNE3
			LVEGEVYAVDER	P_01324	GGACT
			FLDDFESCPALYQR	P_00565	GGACT
			ETEVIDPQDLLEGR	P_00495	SDC4
			AGSGSQVPTEPK	P_00076	SDC4
			NVHGINFVSPVR	P_01470	CTSC
			VVVYLQK	P_02070	CTSC
29	MGHHHHHHLEAARGYSFTTTAEKTALASGGVLDASGDYRYEAAVPDPRAISSIGLECQSVTSRGDLATCPRALLQDKDVIAINQDPLGKSYTIAVASLGKAAYQVAALPKAPGAIGPYSQAVLVDRIDTIAADESFTQGDLGERDCSSIPGAAGTCK	16271.1	TALASGGVLDASGDYR	P_01725	B3GNT1
			YEAAVPDPR	P_02112	B3GNT1
			AISSIGLECQSVTSR	P_00094	RETN
			GDLATCPR	P_00657	RETN
			ALLQDKDVIAINQDPLGK	P_00116	GLA
			SYTIAVASLGK	P_01719	GLA
			AAYQVAALPK	P_00021	HRSP12
			APGAIGPYSQAVLVDR	P_00152	HRSP12
			IDTIAADESFTQGDLGER	P_00935	EPHA10
			DCSSIPGAAGTCK	P_00277	EPHA10
30	MGHHHHHHLEAARGYSFTTTAEKGEFVTTVQQRLGVTANDVKNSCPPTSELLGTSDRFYTFLKYLAEFATGNDRAAFDDAIAELDTLSEESYKDKPLKDVIIADCGKDTNGSQFFITTVKSWDAINRYYGESLPFGDNSFKFIIPNVVKLVIITAGAR	17547.7	GEFVTTVQQR	P_00664	MDH1
			LGVTANDVK	P_01178	MDH1
			NSCPPTSELLGTSDR	P_01452	GPX3
			FYTFLK	P_00631	GPX3
			YLAEFATGNDR	P_02148	YWHAE
			AAFDDAIAELDTLSEESYK	P_00006	YWHAE
			DKPLKDVIIADCGK	P_00330	PPIB
			DTNGSQFFITTVK	P_00384	PPIB
			SWDAINR	P_01714	PRCP
			YYGESLPFGDNSFK	P_02200	PRCP
			FIIPNVVK	P_00561	LDHA
			LVIITAGAR	P_01332	LDHA
31	MGHHHHHHLEAARGYSFTTTAEKVPAINVNDSVTKGISEETTTGVHNLYKVVGAVGSDEKHFVGYPTNSDFELKIVGGNAAQLAQFDPRLISEVIGERAIGLPEELIQKGVSEIVQNGKLSNNALSGLPQGVFGKLELLSLSKIAVAGDLFQPERDGEATLEVDGTR	17842.2	VPAINVNDSVTK	P_02006	AHCY
			GISEETTTGVHNLYK	P_00722	AHCY
			VVGAVGSDEK	P_02058	PTGR1
			HFVGYPTNSDFELK	P_00856	PTGR1
			IVGGNAAQLAQFDPR	P_01064	GPD1
			LISEVIGER	P_01197	GPD1
			AIGLPEELIQK	P_00090	FABP1
			GVSEIVQNGK	P_00827	FABP1
			LSNNALSGLPQGVFGK	P_01297	CPN2
			LELLSLSK	P_01131	CPN2
			IAVAGDLFQPER	P_00928	GAS6
			DGEATLEVDGTR	P_00300	GAS6
32	MGHHHHHHLEAARGYSFTTTAEKGAGTDDHTLIRGLGTDEESILTLLTSRLVQAFQFTDKADEGISFRYGLLVGGAASHRCSGIASAAAAAVEAARSSGLVSNAPGVQIRSTELCGLWQGRHVLFGTVGVPEHTYRVLYLSAFTSKDYSADTLAHHNDIALLKTCYEGNGHFYR	18715.3	GAGTDDHTLIR	P_00636	ANXA5
			GLGTDEESILTLLTSR	P_00737	ANXA5
			LVQAFQFTDK	P_01341	PRDX1
			ADEGISFR	P_00031	PRDX1
			YGLLVGGAASHR	P_02138	QPRT
			CSGIASAAAAAVEAAR	P_00251	QPRT
			SSGLVSNAPGVQIR	P_01688	LCAT
			STELCGLWQGR	P_01697	LCAT
			HVLFGTVGVPEHTYR	P_00902	THY1
			VLYLSAFTSK	P_01991	THY1
			DYSADTLAHHNDIALLK	P_00402	PLAU
			TCYEGNGHFYR	P_01738	PLAU
33	MGHHHHHHLEAARGYSFTTTAEKNYGQLDIFPARAVGLLTVISKIDSVSEGNAGPYRGPVGVQTFRDSCTLPASAEKACGACPLWGKLTEPADTITDAVKLVDTLPQKPRSIVVANYEESIKTAFDEAIAELDTLSEESYKFLIPNASQAESKLADLIER	17330.7	NYGQLDIFPAR	P_01483	MUC1
			AVGLLTVISK	P_00205	PSCA
			IDSVSEGNAGPYR	P_00934	LAIR1
			GPVGVQTFR	P_00770	LAIR1
			DSCTLPASAEK	P_00372	C7
			ACGACPLWGK	P_00024	C7
			LTEPADTITDAVK	P_01303	KLK1
			LVDTLPQKPR	P_01322	SCGB1A1
			SIVVANYEESIK	P_01622	HPD
			TAFDEAIAELDTLSEESYK	P_01723	YWHAZ
			FLIPNASQAESK	P_00572	YWHAZ
			LADLIER	P_01085	ALDH1A1
34	MGHHHHHHLEAARGYSFTTTAEKADAGTAVTFQCRGFSGIFEDRVTDPQLVVTLHEKTEHPFTVEEFVLPKSSGSLLNNAIKDLVGELGTALRTQHFVSAKAFGHHAVSLLDGGLRAQLDPAFIKSNVSDAVAQSTRIIYGGSVTGATCKFGQTPVQERYQYNTDVVFDSQGK	18772.4	ADAGTAVTFQCR	P_00028	CILP2
			GFSGIFEDR	P_00688	PDGFRB
			VTDPQLVVTLHEK	P_02034	PDGFRB
			TEHPFTVEEFVLPK	P_01749	A2M
			SSGSLLNNAIK	P_01690	A2M
			DLVGELGTALR	P_00348	FUCA1
			TQHFVSAK	P_01825	FUCA1
			AFGHHAVSLLDGGLR	P_00051	MPST
			AQLDPAFIK	P_00163	MPST
			SNVSDAVAQSTR	P_01653	TPI1
			IIYGGSVTGATCK	P_00987	TPI1
			FGQTPVQER	P_00549	VNN1
			YQYNTDVVFDSQGK	P_02176	VNN1
35	MGHHHHHHLEAARGYSFTTTAEKLAELPADALGPLQRDFALQNPSAVPRNIIHGSDSVKTFIAIKPDGVQRHGTCAAQVDALNSQKELDLNSVLLKHVLQTFGPIPEFSRLYDIEQQQIRLQIWDTAGQERLLIIGDSGVGKVITEPIPVSDLRSPTNTVTVQGLKGSCIANAEEVDVPIK	19736.3	LAELPADALGPLQR	P_01087	IGFALS
			DFALQNPSAVPR	P_00289	IGFALS
			NIIHGSDSVK	P_01403	NME2
			TFIAIKPDGVQR	P_01759	NME2
			HGTCAAQVDALNSQK	P_00862	RNASET2
			ELDLNSVLLK	P_00453	RNASET2
			HVLQTFGPIPEFSR	P_00903	CRYL1
			LYDIEQQQIR	P_01352	CRYL1
			LQIWDTAGQER	P_01271	RAB35
			LLIIGDSGVGK	P_01225	RAB35
			VITEPIPVSDLR	P_01959	PTPRJ
			SPTNTVTVQGLK	P_01663	EPHB2
			GSCIANAEEVDVPIK	P_00786	EPHB2
36	MGHHHHHHLEAARGYSFTTTAEKVCEAGSGLVFSCQDKCAYGYYQDETTGRTLLNETPEQIKNLQDFAACGIDRLGEPIPISKYALYDATYETKTVESITDIRALQATVGNSYKSQLEAIFLRALLNVVDNARAPEPLELTLPVELLADTRILNVHVPR	17665.9	VCEAGSGLVFSCQDK	P_01884	NGFR
			CAYGYYQDETTGR	P_00224	NGFR
			TLLNETPEQIK	P_01800	PROM1
			NLQDFAACGIDR	P_01422	PROM1
			LGEPIPISK	P_01157	FAH
			YALYDATYETK	P_02105	CFL1
			TVESITDIR	P_01848	LAMP1
			ALQATVGNSYK	P_00127	LAMP1
			SQLEAIFLR	P_01672	PLD3
			ALLNVVDNAR	P_00115	PLD3
			APEPLELTLPVELLADTR	P_00151	BPIFB2
			ILNVHVPR	P_01002	BPIFB2
37	MGHHHHHHLEAARGYSFTTTAEKLTSLPLGALRLTQLNLDRCDSDILPLRNSLTHISPRGSFSSTAAQDAQGQRINNIAVAVGKGAEIVADTFRTVVAGSSDAAQKLQDAEIARTGEVLDTKGINVALANGKSLTATGGNHVTARTDTYVTDNGDGTYR	16794.5	LTSLPLGALR	P_01316	GP1BA
			LTQLNLDR	P_01315	GP1BA
			CDSDILPLR	P_00227	LRRC15
			NSLTHISPR	P_01455	LRRC15
			GSFSSTAAQDAQGQR	P_00791	GPR180
			INNIAVAVGK	P_01017	GPR180
			GAEIVADTFR	P_00634	DDAH2
			TVVAGSSDAAQK	P_01854	DDAH2
			LQDAEIAR	P_01265	S100A6
			TGEVLDTK	P_01766	FAM3C
			GINVALANGK	P_00719	FAM3C
			SLTATGGNHVTAR	P_01647	FLNC
			TDTYVTDNGDGTYR	P_01745	FLNC
38	MGHHHHHHLEAARGYSFTTTAEKVNVDEVGGEALGREFTPPVQAAYQKYFESVLDRGATTTFSAVERDSGPYSCSVNVQDKSEAAAVQPVIGISQREDQTSPAPGLRIGKPAPDFKATAVVDGAFKTITLEVEPSDTIENVKTLSDYNIQKSAEITGVRHPGLADVR	17981	VNVDEVGGEALGR	P_02001	HBB
			EFTPPVQAAYQK	P_00437	HBB
			YFESVLDR	P_02126	DPT
			GATTTFSAVER	P_00648	DPT
			DSGPYSCSVNVQDK	P_00373	ESAM
			SEAAAVQPVIGISQR	P_01565	PIK3IP1
			EDQTSPAPGLR	P_00429	PIK3IP1
			IGKPAPDFK	P_00966	PRDX2
			ATAVVDGAFK	P_00183	PRDX2
			TITLEVEPSDTIENVK	P_01789	UBB
			TLSDYNIQK	P_01806	UBB
			SAEITGVR	P_01541	MOCS2
			HPGLADVR	P_00884	MOCS2
39	MGHHHHHHLEAARGYSFTTTAEKKELEEDFIKAAYNLVRYTCGEAPDYDRITQSNAILRIHSDCAANQQVTYRYQGTILSIDDNLQRLVGLLDLALEKLVGLLDLALEKDYVRSTDYGIFQINSRGILLFGPPGTGKEAVILPIKVKPQLEEKLEAVQYK	18072.4	KELEEDFIK	P_01079	COTL1
			AAYNLVR	P_00020	COTL1
			YTCGEAPDYDR	P_02185	GSTM3
			ITQSNAILR	P_01056	GSTM3
			IHSDCAANQQVTYR	P_00974	DSG1
			YQGTILSIDDNLQR	P_02175	DSG1
			LVGLLDLALEK	P_01327	AMY2B
			LVGLLDLALEKDYVR	P_01328	AMY2B
			STDYGIFQINSR	P_01696	LYZ
			GILLFGPPGTGK	P_00717	VPS4B
			EAVILPIK	P_00423	VPS4B
			VKPQLEEK	P_01960	CSTA
			LEAVQYK	P_01122	CSTA
40	MGHHHHHHLEAARGYSFTTTAEKGYYYEIPSIGAIRLEETITQARFTDSENVCQERFLVNLVKLLLLGAGESGKVLTSGIFETKECRPGGSCAPCGGDLTFDPGPRVLDALQAIKYSSLAEAASKISYQSSSTEERDVSQSSIYSQTEEKSPQGLGAFTPVVRYELLFR	18527.2	GYYYEIPSIGAIR	P_00841	CACNA2D1
			LEETITQAR	P_01124	CACNA2D1
			FTDSENVCQER	P_00606	AFM
			FLVNLVK	P_00581	AFM
			LLLLGAGESGK	P_01227	GNAS
			VLTSGIFETK	P_01989	GNAS
			ECRPGGSCAPCGGDLTFDPGPR	P_00424	EPHB4
			VLDALQAIK	P_01966	CA1
			YSSLAEAASK	P_02184	CA1
			ISYQSSSTEER	P_01049	SEMG1
			DVSQSSIYSQTEEK	P_00391	SEMG1
			SPQGLGAFTPVVR	P_01662	PTPRS
			YELLFR	P_02119	PTPRS
41	MGHHHHHHLEAARGYSFTTTAEKGLEPDTDWEERTGQEIPVNVRASEQIYYENRIIIQESALDYRSLGVGFATRSLAPAVVTGKDLGAIVYCVGVKDQAGEYECSAENDVSFPDVRNGDILTLKDAAAPSQPLRIQAQDPEFSDLNSAITYRYVWSHVILK	17907.8	GLEPDTDWEER	P_00729	AQP2
			TGQEIPVNVR	P_01769	CNDP2
			ASEQIYYENR	P_00174	ANTXR1
			IIIQESALDYR	P_00981	GLG1
			SLGVGFATR	P_01637	FABP3
			SLAPAVVTGK	P_01625	AQP2
			DLGAIVYCVGVK	P_00338	ANTXR1
			DQAGEYECSAENDVSFPDVR	P_00365	NEGR1
			NGDILTLK	P_01389	FABP3
			DAAAPSQPLR	P_00258	CDHR5
			IQAQDPEFSDLNSAITYR	P_01028	CDHR5
			YVWSHVILK	P_02197	CLMP
42	MGHHHHHHLEAARGYSFTTTAEKFEDGGYVVCNTRKDVLETFTVKAALPAQELEEYNKYVELINQAARGACPVFECGNVVLRYLGPQYVAGITNLKVVASGPGLEHGKNDAPVVQEPRTTPPVLDSDGSFFLYSRSFCDLTDEWRIQQIPNVRGLGTDDNTLIR	18209	FEDGGYVVCNTR	P_00528	LGALS9
			KDVLETFTVK	P_01078	CD9
			AALPAQELEEYNK	P_00013	ACE
			YVELINQAAR	P_02194	ACE
			GACPVFECGNVVLR	P_00632	HAVCR2
			YLGPQYVAGITNLK	P_02154	LTF
			VVASGPGLEHGK	P_02053	FLNB
			NDAPVVQEPR	P_01374	ROR1
			TTPPVLDSDGSFFLYSR	P_01839	IGHG4
			SFCDLTDEWR	P_01577	IFNAR2
			IQQIPNVR	P_01035	PLXDC2
			GLGTDDNTLIR	P_00735	ANXA4
43	MGHHHHHHLEAARGYSFTTTAEKTPALIALRGGVVLKEDALPGQKAHGQDLGTAGSCLRVAYLDPLELSEGKLEGEACGVYTPRIGDPLLEDTRVYYTAGYNSPVKVDINTEDLEDGTCRDLEVVEGSAARAPTAQVESFRNEEALDTESSERIQSFLGGAPTEDLK	17981.8	TPALIALR	P_01815	AKR1C2
			GGVVLKEDALPGQK	P_00701	BSG
			AHGQDLGTAGSCLR	P_00083	COL4A1
			VAYLDPLELSEGK	P_01883	BCAM
			LEGEACGVYTPR	P_01125	IGFBP2
			IGDPLLEDTR	P_00958	ALDH9A1
			VYYTAGYNSPVK	P_02080	HEBP2
			VDINTEDLEDGTCR	P_01889	FLNA
			DLEVVEGSAAR	P_00337	MYLK
			APTAQVESFR	P_00157	TNC
			NEEALDTESSER	P_01379	NEO1
			IQSFLGGAPTEDLK	P_01037	MSLN
44	MGHHHHHHLEAARGYSFTTTAEKDSVSSVSDISQYRLGALALSPKLVLLGESAVGKLLVGPTTLAQEGFLVDTPLARYLGVTLSPRAQNDQLGWLWGQSRTVENVTVFGTASASKSGEESYNLDSVAKFANTVGLVVERCLDPVDTPNPTRNPVLQQDAHSSVTITPQRIPACIAGER	19061.7	DSVSSVSDISQYR	P_00380	EPS8
			LGALALSPK	P_01152	CDH16
			LVLLGESAVGK	P_01334	RAB5A
			LLVGPTTLAQEGFLVDTPLAR	P_01239	GGT6
			YLGVTLSPR	P_02156	GP5
			AQNDQLGWLWGQSR	P_00165	HYAL1
			TVENVTVFGTASASK	P_01847	VAT1
			SGEESYNLDSVAK	P_01592	ACY3
			FANTVGLVVER	P_00518	HAAO
			CLDPVDTPNPTR	P_00239	SLPI
			NPVLQQDAHSSVTITPQR	P_01441	CD276
			IPACIAGER	P_01022	DEFA3
45	MGHHHHHHLEAARGYSFTTTAEKVAELENSEFRGVISNSGGPVRLLCEVTPVSGQERGSDPVTIFLRANAQAAALYKGLDTSLGAVQSDTGRCLTPPESIPKGVTFNVTTVDTKVHLSDSERTASTNNIAQARVLSNTEDLPLVTKDGYNYTLSK	16639.3	VAELENSEFR	P_01866	CD58
			GVISNSGGPVR	P_00820	COCH
			LLCEVTPVSGQER	P_01208	LAG3
			GSDPVTIFLR	P_00788	VSIG4
			ANAQAAALYK	P_00140	CAPG
			GLDTSLGAVQSDTGR	P_00728	MADCAM1
			CLTPPESIPK	P_00241	GALNS
			GVTFNVTTVDTK	P_00829	CLIC1
			VHLSDSER	P_01945	SDC2
			TASTNNIAQAR	P_01732	GNG12
			VLSNTEDLPLVTK	P_01987	LYNX1
			DGYNYTLSK	P_00315	S100A11
46	MGHHHHHHLEAARGYSFTTTAEKIDSSNELGFIVKIQGTCYRSHAPNPAAPVCPCLEGFYRAILNYIASKALPFWNEEIVPQIKDDSECITRGQLPISVTCIADEIGARVTSDHINFDPVYKSNLNSLDEQEGVKCPGESSHICDFIRLVVLGSGGVGKIQGDLAGR	18221	IDSSNELGFIVK	P_00933	CLEC7A
			IQGTCYR	P_01031	DEFB1
			SHAPNPAAPVCPCLEGFYR	P_01602	EPHB6
			AILNYIASK	P_00092	GSTA2
			ALPFWNEEIVPQIK	P_00124	PGAM1
			DDSECITR	P_00283	LEAP2
			GQLPISVTCIADEIGAR	P_00778	CLEC14A
			VTSDHINFDPVYK	P_02043	IL6ST
			SNLNSLDEQEGVK	P_01651	GGCT
			CPGESSHICDFIR	P_00245	PPT1
			LVVLGSGGVGK	P_01346	RAP1B
			IQGDLAGR	P_01030	JAM3
47	MGHHHHHHLEAARGYSFTTTAEKRPSEIVIGQCKAPGEGPQVACTGPPSAPRCPAGFIDKTVENFVALATGEKGILFVGSGVSGGEEGARLEGEPVALRAVLEALGSCLNNKNLEPVSWSSLNPKFAGAGVTTERLQGTLFSTEEEPSKLLAQTTLRYLQTLTTIAAEKAEEYEFLTPVEEAPKGLVLSGVLHKSPPGQVTEAVK	21626	RPSEIVIGQCK	P_01537	HRG
			APGEGPQVACTGPPSAPR	P_00153	EPHA1
			CPAGFIDK	P_00243	DLK1
			TVENFVALATGEK	P_01846	PPIC
			GILFVGSGVSGGEEGAR	P_00716	PGD
			LEGEPVALR	P_01126	IL1R2
			AVLEALGSCLNNK	P_00206	SHMT1
			NLEPVSWSSLNPK	P_01416	EFNB1
			FAGAGVTTER	P_00516	CD33
			LQGTLFSTEEEPSK	P_01269	CA14
			LLAQTTLR	P_01207	STOM
			YLQTLTTIAAEK	P_02162	STOM
			AEEYEFLTPVEEAPK	P_00042	ARHGDIA
			GLVLSGVLHK	P_00746	SERPINB3
			SPPGQVTEAVK	P_01661	AKR1B1
48	MGHHHHHHLEAARGYSFTTTAEKADAVTLDGGFIYEAGLAPYKDVTVLQNTDGNNNEAWAKIAQLEEQLDNETKNFINNPLAQADWAAKLVNEVTEFAKQTALVELVKHGQALGELAEQLEQARLLGLGVTDFSRALEHFTDLYDIKVIQCFAETGQVQKDGLAFNALIHRLSGSNPYTTVTPQIINSKTINEVENQILTRCFEGFGIDGPAIAKSPDVINGSPISQK	24968.6	ADAVTLDGGFIYEAGLAPYK	P_00029	LTF
			DVTVLQNTDGNNNEAWAK	P_00395	LTF
			IAQLEEQLDNETK	P_00922	MYH9
			NFINNPLAQADWAAK	P_01381	MYH9
			LVNEVTEFAK	P_01337	ALB
			QTALVELVK	P_01520	ALB
			HGQALGELAEQLEQAR	P_00860	MYH14
			LLGLGVTDFSR	P_01222	MYH14
			ALEHFTDLYDIK	P_00112	CLTC
			VIQCFAETGQVQK	P_01957	CLTC
			DGLAFNALIHR	P_00302	ACTN4
			LSGSNPYTTVTPQIINSK	P_01292	ACTN4
			TINEVENQILTR	P_01783	ACTN4
			CFEGFGIDGPAIAK	P_00230	CFH
			SPDVINGSPISQK	P_01656	CFH
49	MGHHHHHHLEAARGYSFTTTAEKCLAYDFYPGKAGEVQEPELRGVDEVTIVNILTNRQDIAFAYQRCVWEIEVNSGYRINLGFSNLKDASGVTFTWTPSSGKTPLTATLSKAGFVCPTPPYKVGPLLACLLGKFAYGYIEDLKLGVQDLFNSSKIPADTFAALKLGNFFSPK	18924.6	CLAYDFYPGK	P_00238	AZGP1
			AGEVQEPELR	P_00067	AZGP1
			GVDEVTIVNILTNR	P_00814	ANXA2
			QDIAFAYQR	P_01495	ANXA2
			CVWEIEVNSGYR	P_00256	DMBT1
			INLGFSNLK	P_01016	DMBT1
			DASGVTFTWTPSSGK	P_00269	IGHA1
			TPLTATLSK	P_01818	IGHA1
			AGFVCPTPPYK	P_00068	LPO
			VGPLLACLLGK	P_01936	LPO
			FAYGYIEDLK	P_00521	SERPINB1
			LGVQDLFNSSK	P_01176	SERPINB1
			IPADTFAALK	P_01023	IQGAP1
			LGNFFSPK	P_01169	IQGAP1
50	MGHHHHHHLEAARGYSFTTTAEKILAQATSDLVNAIKTLAESALQLLYTAKALTGHLEEVVLALLKGLGTDEDTLIEILASRLYDDIDFDIEEFAKDGAGDVAFVKEDPQTFYYAVAVVKDLYLENPEIKTVSYNGILGPECGTKVAAALDDGSALGRVSLVLAPALAACGCKCDENILWLDYKIYVDDGLISLQVKLNFSHGTHEYHAETIKFPGQLNADLRINVYYNEATGGK	25600	ILAQATSDLVNAIK	P_00989	TLN1
			TLAESALQLLYTAK	P_01792	TLN1
			ALTGHLEEVVLALLK	P_00136	ANXA1
			GLGTDEDTLIEILASR	P_00736	ANXA1
			LYDDIDFDIEEFAK	P_01351	CNDP2
			DGAGDVAFVK	P_00298	TF
			EDPQTFYYAVAVVK	P_00427	TF
			DLYLENPEIK	P_00351	TGM2
			TVSYNGILGPECGTK	P_01852	TGM2
			VAAALDDGSALGR	P_01861	TYMP
			VSLVLAPALAACGCK	P_02027	TYMP
			CDENILWLDYK	P_00226	PKM
			IYVDDGLISLQVK	P_01077	PKM
			LNFSHGTHEYHAETIK	P_01243	PKM
			FPGQLNADLR	P_00585	TUBB4B
			INVYYNEATGGK	P_01020	TUBB4B
51	MGHHHHHHLEAARGYSFTTTAEKEQGYDVIAYLANIGQKNQAPPGLYTKAATSDLEHYDKLVTLEEFLKFVAESAEVLLPRQLDVLYPKGAGTNEDALIEILTTRGIGTDEFTLNRGFEPTLEALFGKHIQNIDIQHLAGKDYFGAHTYELLAKLIGQIVSSITASLRTIQFVDWCPTGFKELGATECINPQDYKFSLDALITNILPFEK	23408	EQGYDVIAYLANIGQK	P_00482	ASS1
			NQAPPGLYTK	P_01443	ASS1
			AATSDLEHYDK	P_00018	NUCB2
			LVTLEEFLK	P_01344	NUCB2
			FVAESAEVLLPR	P_00614	MSLN
			QLDVLYPK	P_01503	MSLN
			GAGTNEDALIEILTTR	P_00640	ANXA3
			GIGTDEFTLNR	P_00713	ANXA3
			GFEPTLEALFGK	P_00680	APOB
			HIQNIDIQHLAGK	P_00866	APOB
			DYFGAHTYELLAK	P_00400	PGD
			LIGQIVSSITASLR	P_01192	TUBA1A
			TIQFVDWCPTGFK	P_01786	TUBA1A
			ELGATECINPQDYK	P_00455	ADH1C
			FSLDALITNILPFEK	P_00599	ADH1C
52	MGHHHHHHLEAARGYSFTTTAEKANSTDYGLTAAVFTKIAFTGSTEVGKLLHQLADLVERGLLEFEHQRLDLLEDRLNLGTVGFYRVLGATLLPDLIQKELSLAGNELGDEGARELTVSNNDINEAGVRGGPVQVLEDEELKHEIVQTLSLKAIANECQANFISIKLGDVISIQPCPDVKLPACVVDCGTGYTKLSEELSGGR	21988.2	ANSTDYGLTAAVFTK	P_00147	ALDH1A3
			IAFTGSTEVGK	P_00917	ALDH1A3
			LLHQLADLVER	P_01224	ALDH1A3
			GLLEFEHQR	P_00740	GANAB
			LDLLEDR	P_01115	GANAB
			LNLGTVGFYR	P_01248	NPEPPS
			VLGATLLPDLIQK	P_01973	NPEPPS
			ELSLAGNELGDEGAR	P_00468	RNH1
			ELTVSNNDINEAGVR	P_00470	RNH1
			GGPVQVLEDEELK	P_00697	SELENBP1
			HEIVQTLSLK	P_00850	SELENBP1
			AIANECQANFISIK	P_00085	VCP
			LGDVISIQPCPDVK	P_01154	VCP
			LPACVVDCGTGYTK	P_01256	ACTR3
			LSEELSGGR	P_01287	ACTR3
53	MGHHHHHHLEAARGYSFTTTAEKGLEVTAYSPLGSSDRGLVQALGLSNFNSRQLNEINYEDHKYGLVTYATYPKIGVTVLSRTNFFGTRLFSGDVVLTARVFSGLVSTGLKYEWDVAEARGALQNIIPASTGAAKVGVNGFGREPQVYTLPPSRQVGSGVTTDQVQAEAKAGVETTTPSKFSGSNSGNTATLTISR	20910.6	GLEVTAYSPLGSSDR	P_00731	AKR1A1
			GLVQALGLSNFNSR	P_00747	AKR1A1
			QLNEINYEDHK	P_01507	CFB
			YGLVTYATYPK	P_02139	CFB
			IGVTVLSR	P_00968	CBR1
			TNFFGTR	P_01810	CBR1
			LFSGDVVLTAR	P_01146	CBR1
			VFSGLVSTGLK	P_01923	EEF2
			YEWDVAEAR	P_02121	EEF2
			GALQNIIPASTGAAK	P_00643	GAPDH
			VGVNGFGR	P_01939	GAPDH
			EPQVYTLPPSR	P_00480	IGHG1
			QVGSGVTTDQVQAEAK	P_01527	IGHG1
			AGVETTTPSK	P_00077	IGLC2
			FSGSNSGNTATLTISR	P_00597	IGLC2
54	MGHHHHHHLEAARGYSFTTTAEKCVDTMAYEKVLITKTLGKAPLEAVAAKALASQLQDSLKAQQVSQGLDVLTAKSIGVSNFNRLAIEAGFRANNTFYGLSAGVFTKVELEDWNGRYEASILTHDSSIRDLGTESQIFISRFVSISDLLVPKHWPFQVINDGDKPKLLQDFFNGRQVVESAYEVIKVTLTSEEEAR	21725.1	CVDTMAYEK	P_00255	SCGB1D1
			VLITKTLGK	P_01977	SCGB1D1
			APLEAVAAK	P_00155	SCGB1D1
			ALASQLQDSLK	P_00103	VCL
			AQQVSQGLDVLTAK	P_00168	VCL
			SIGVSNFNR	P_01614	AKR1C1
			LAIEAGFR	P_01093	AKR1C1
			ANNTFYGLSAGVFTK	P_00146	ALDH1A1
			VELEDWNGR	P_01908	FGG
			YEASILTHDSSIR	P_02113	FGG
			DLGTESQIFISR	P_00342	GDI2
			FVSISDLLVPK	P_00619	GDI2
			HWPFQVINDGDKPK	P_00909	HSPA1A
			LLQDFFNGR	P_01235	HSPA1A
55	MGHHHHHHLEAARGYSFTTTAEKLDLSENQIQGIPRLQVLPELLFQSTPKALTLIAGSPLKLTLIDPETLLPRAEVDDVIQVRFCENPDEVKVEITYTPSDGTQKATNYNAGDRWESGYNTRAVEPQLQEEERFLEQELETITIPDLRQCFLNQSHRTINSDISIPEYK	19280.7	QVVESAYEVIK	P_01532	LDHA
			VTLTSEEEAR	P_02042	LDHA
			LDLSENQIQGIPR	P_01116	SLIT3
			LQVLPELLFQSTPK	P_01280	SLIT3
			ALTLIAGSPLK	P_00137	CAND1
			LTLIDPETLLPR	P_01311	CAND1
			AEVDDVIQVR	P_00047	F5
			FCENPDEVK	P_00522	F5
			VEITYTPSDGTQK	P_01906	IDH1
			ATNYNAGDR	P_00192	LYZ
			WESGYNTR	P_02087	LYZ
			AVEPQLQEEER	P_00200	PLTP
			FLEQELETITIPDLR	P_00568	PLTP
			QCFLNQSHR	P_01494	SCGB2A1
			TINSDISIPEYK	P_01784	SCGB2A1
56	MGHHHHHHLEAARGYSFTTTAEKAEEQPQVELFVKLAALNPESNTAGLDIFAKIGGIGTVPVGRYYVTIIDAPGHRQFIENGSEFAQKSILLTEQALAKAPLDIPVPDPVKIEDGNNFGVAVQEKGVALSNVIHKIIELPFQNKVFVAFQAFLRYFSTTEDYDHEITGLRGITGVDLFGTTDAVVKLVGQSIIAYLQK	21654.3	AEEQPQVELFVK	P_00040	CLIC1
			LAALNPESNTAGLDIFAK	P_01082	CLIC1
			IGGIGTVPVGR	P_00963	EEF1A1
			YYVTIIDAPGHR	P_02201	EEF1A1
			QFIENGSEFAQK	P_01497	LACRT
			SILLTEQALAK	P_01617	LACRT
			APLDIPVPDPVK	P_00154	PSME1
			IEDGNNFGVAVQEK	P_00940	PSME1
			GVALSNVIHK	P_00813	SERPINB5
			IIELPFQNK	P_00978	SERPINB5
			VFVAFQAFLR	P_01925	ZG16B
			YFSTTEDYDHEITGLR	P_02128	ZG16B
			GITGVDLFGTTDAVVK	P_00724	COPA
			LVGQSIIAYLQK	P_01329	COPA
57	MGHHHHHHLEAARGYSFTTTAEKEQTFGGVNYFFDVEVGRIIPGGIYDADLNDEWVQRILDDDTIITTLENLKTPVIDADKPVSSQLREWFLQAAKHFVALSTNTTKAIENELLARHVLSVLSKELSTTLNADEAVTRSNLAYDIVQLPTGLTGIKAAISGENAGLVREVAFDLEIPKGTSAVNVVLSLKLSDVSSGELALIILALGVCR	22848.9	EQTFGGVNYFFDVEVGR	P_00487	CST4
			IIPGGIYDADLNDEWVQR	P_00984	CST4
			ILDDDTIITTLENLK	P_00993	DYNC1H1
			TPVIDADKPVSSQLR	P_01819	DYNC1H1
			EWFLQAAK	P_00509	GPI
			HFVALSTNTTK	P_00855	GPI
			AIENELLAR	P_00088	GSS
			HVLSVLSK	P_00904	GSS
			ELSTTLNADEAVTR	P_00469	HSPA4
			SNLAYDIVQLPTGLTGIK	P_01650	HSPA4
			AAISGENAGLVR	P_00011	ITIH1
			EVAFDLEIPK	P_00500	ITIH1
			GTSAVNVVLSLK	P_00808	TCN1
			LSDVSSGELALIILALGVCR	P_01286	TCN1
58	MGHHHHHHLEAARGYSFTTTAEKANATEFGLASGVFTRHGSIIYHPSLLPRATEHLSTLSEKASLINNAFQLVSIGKILASTQFEPTAARQQASSWVPLLNKSQYLLTAIHKIAPAVVHIELFRVTAGISFAIPSDKIEDILEVIEKYLNAGAGGIAGAFIHEKHYCTVANPVSRLAQDPFPLYPGEVLEKDFTPVCTTELGRFHDFLGDSWGILFSHPR	24131.5	ANATEFGLASGVFTR	P_00141	ALDH1L1
			HGSIIYHPSLLPR	P_00861	ALDH1L1
			ATEHLSTLSEK	P_00186	APOA1
			ASLINNAFQLVSIGK	P_00178	ERAP1
			ILASTQFEPTAAR	P_00990	ERAP1
			QQASSWVPLLNK	P_01514	SFRP1
			SQYLLTAIHK	P_01676	SFRP1
			IAPAVVHIELFR	P_00921	HTRA1
			VTAGISFAIPSDK	P_02032	HTRA1
			IEDILEVIEK	P_00941	KYNU
			YLNAGAGGIAGAFIHEK	P_02160	KYNU
			HYCTVANPVSR	P_00910	MVP
			LAQDPFPLYPGEVLEK	P_01101	MVP
			DFTPVCTTELGR	P_00296	PRDX6
			FHDFLGDSWGILFSHPR	P_00554	PRDX6
59	MGHHHHHHLEAARGYSFTTTAEKFPSVSLQEASSFFRALNSIIDVYHKGADVWFKDVDEIEAWISEKLGESQTLQQFSRHVFGESDELIGQKVPADTEVVCAPPTAYIDFARALPAVQQNNLDEDLIRLAGTQPLEVLEAVQRSAADSISESVPVGPKSSENPNEVFRAPDFVFYAPRFYPEDVAEELIQDITQKHIVLSGGSTMYPGLPSRLCYVGYNIEQEQK	25121.4	FPSVSLQEASSFFR	P_00586	PRR4
			ALNSIIDVYHK	P_00122	S100A8
			GADVWFK	P_00633	S100A8
			DVDEIEAWISEK	P_00386	SPTAN1
			LGESQTLQQFSR	P_01159	SPTAN1
			HVFGESDELIGQK	P_00898	TPI1
			VPADTEVVCAPPTAYIDFAR	P_02005	TPI1
			ALPAVQQNNLDEDLIR	P_00123	UBA1
			LAGTQPLEVLEAVQR	P_01091	UBA1
			SAADSISESVPVGPK	P_01539	USP5
			SSENPNEVFR	P_01683	USP5
			APDFVFYAPR	P_00148	EZR
			FYPEDVAEELIQDITQK	P_00628	EZR
			HIVLSGGSTMYPGLPSR	P_00869	ACTR2
			LCYVGYNIEQEQK	P_01109	ACTR2
60	MGHHHHHHLEAARGYSFTTTAEKELPVNAQNYVRFIEDELQIPVKVLCGGDIYVPEDPKGAGTDEGCLIEILASRAQEENTWFSYLKAVPWVILSDGDGTVEKQAALQVAEGFISRAFYVNVLNEEQRGAGAFGYFEVTHDITKNVLDSEDEIEELSKSQFSDKPVQDRFTQISPVWLQLKILGLLDAYLKWFLTCINQPQFRGAGTGGLGLTVEGPCEAKLIALLEVLSQK	25780	ELPVNAQNYVR	P_00464	ADSS
			FIEDELQIPVK	P_00559	ADSS
			VLCGGDIYVPEDPK	P_01965	ALDH9A1
			GAGTDEGCLIEILASR	P_00638	ANXA4
			AQEENTWFSYLK	P_00160	CANT1
			AVPWVILSDGDGTVEK	P_00209	CANT1
			QAALQVAEGFISR	P_01490	CAPG
			AFYVNVLNEEQR	P_00061	CAT
			GAGAFGYFEVTHDITK	P_00635	CAT
			NVLDSEDEIEELSK	P_01471	CHID1
			SQFSDKPVQDR	P_01669	CHID1
			FTQISPVWLQLK	P_00613	CHID1
			ILGLLDAYLK	P_00997	EEF1G
			WFLTCINQPQFR	P_02088	EEF1G
			GAGTGGLGLTVEGPCEAK	P_00639	FLNB
			LIALLEVLSQK	P_01189	FLNB
61	MGHHHHHHLEAARGYSFTTTAEKEGNFNVYLSDLIPVDRLSFSEINTRALNEACESVIQTACKSEDCFILDHGKAGALNSNDAFVLKENISDPTSPLRSSEDPNEDIVERFYNQVSTPLLRVQFELHYQEVKAACLPLPGYRLNLAFIANLFNRGNDVAFHFNPRIQVLVEPDHFK	19927.8	EGNFNVYLSDLIPVDR	P_00441	GALNT5
			LSFSEINTR	P_01289	GALNT5
			ALNEACESVIQTACK	P_00120	GLG1
			SEDCFILDHGK	P_01567	GSN
			AGALNSNDAFVLK	P_00063	GSN
			ENISDPTSPLR	P_00475	IGJ
			SSEDPNEDIVER	P_01682	IGJ
			FYNQVSTPLLR	P_00627	ITIH2
			VQFELHYQEVK	P_02013	ITIH2
			AACLPLPGYR	P_00003	LCP1
			LNLAFIANLFNR	P_01247	LCP1
			GNDVAFHFNPR	P_00749	LGALS3
			IQVLVEPDHFK	P_01040	LGALS3
62	MGHHHHHHLEAARGYSFTTTAEKGSPGLSFYFKIVELFVNISKWVSLDNWTYSKGSDHSASLEPGELAELVRVGSGDTNNFPYLEKFSQAVILSQLFPLESIRLNSPLSLPFVPGRLLDSLPSDTRALSEALTELGYKVLEACSIACNKAFNTISAWALQSGALDASRILVDISNNLKAGHYAASIIIRSLIANLAAANCYK	21996.3	GSPGLSFYFK	P_00797	MANBA
			IVELFVNISK	P_01062	MANBA
			WVSLDNWTYSK	P_02099	MANBA
			GSDHSASLEPGELAELVR	P_00787	NANS
			VGSGDTNNFPYLEK	P_01937	NANS
			FSQAVILSQLFPLESIR	P_00601	PROL1
			LNSPLSLPFVPGR	P_01253	PROL1
			LLDSLPSDTR	P_01214	SERPING1
			ALSEALTELGYK	P_00132	SHMT1
			VLEACSIACNK	P_01968	SHMT1
			AFNTISAWALQSGALDASR	P_00055	STEAP4
			ILVDISNNLK	P_01007	STEAP4
			AGHYAASIIIR	P_00069	ADK
			SLIANLAAANCYK	P_01639	ADK
63	MGHHHHHHLEAARGYSFTTTAEKFSVVYAKHTLNQIDEVKHLTPVTLELGGKIQQLEALQRASHTAPQVLFSHRDNTINLIHTFRGNQWVGYDDVKILLSIGGYLFGSKFFPLESWQIGKSHSAHFFEFLTKGLIDEVNQDFTNRVQHIQLLQKLFDQAFGLPRQLSSGVSEIR	19873.3	FSVVYAK	P_00605	AHSG
			HTLNQIDEVK	P_00895	AHSG
			HLTPVTLELGGK	P_00878	ALDH3A1
			IQQLEALQR	P_01036	ALDH3A1
			ASHTAPQVLFSHR	P_00176	ARPC2
			DNTINLIHTFR	P_00359	ARPC2
			GNQWVGYDDVK	P_00758	CHI3L2
			ILLSIGGYLFGSK	P_01001	CHI3L2
			FFPLESWQIGK	P_00542	DDT
			SHSAHFFEFLTK	P_01608	DDT
			GLIDEVNQDFTNR	P_00738	FGA
			VQHIQLLQK	P_02016	FGA
			LFDQAFGLPR	P_01139	HSPB1
			QLSSGVSEIR	P_01508	HSPB1
64	MGHHHHHHLEAARGYSFTTTAEKLLAENNEIISNIRVLLAPLGDDFRLLTVPFEKVTLTLPVLNAARGEIIGVKGQYISPFHDIPIYADKLYDNLLEQNLIRYQEALHLGSQLLRFSQFLETEYKYEYGIFNQKAELNEFLTRELAEDGYSGVEVRALDVMVSTFHKELPSFLGKLGHPDTLNQGEFKNIETIINTFHQYSVK	23260	LLAENNEIISNIR	P_01206	MAN2A1
			VLLAPLGDDFR	P_01979	MAN2A1
			LLTVPFEK	P_01238	PGLS
			VTLTLPVLNAAR	P_02041	PGLS
			GEIIGVK	P_00666	PPA1
			GQYISPFHDIPIYADK	P_00782	PPA1
			LYDNLLEQNLIR	P_01353	PSMD11
			YQEALHLGSQLLR	P_02173	PSMD11
			FSQFLETEYK	P_00602	PYGL
			YEYGIFNQK	P_02123	PYGL
			AELNEFLTR	P_00045	RPS3
			ELAEDGYSGVEVR	P_00452	RPS3
			ALDVMVSTFHK	P_00107	S100A4
			ELPSFLGK	P_00463	S100A4
			LGHPDTLNQGEFK	P_01165	S100A9
			NIETIINTFHQYSVK	P_01400	S100A9
65	MGHHHHHHLEAARGYSFTTTAEKLLGELLQDNAKSYEPLEDPGVKAADDTWEPFASGKGSPAINVAVHVFRLAILGIHNEVSKLLETIDQLYLEYAKDGSAVEIVGLSKLEQGYELQFRLQSSNIFTVAKNINLIVQKAEEYEFLTPVEEAPKAENFFILRELLLQPVTISR	19258	LLGELLQDNAK	P_01221	TALDO1
			SYEPLEDPGVK	P_01717	TALDO1
			AADDTWEPFASGK	P_00004	TTR
			GSPAINVAVHVFR	P_00796	TTR
			LAILGIHNEVSK	P_01094	ACTN1
			LLETIDQLYLEYAK	P_01219	ACTN1
			DGSAVEIVGLSK	P_00309	AGL
			LEQGYELQFR	P_01133	AGL
			LQSSNIFTVAK	P_01278	AP1B1
			NINLIVQK	P_01406	AP1B1
			AEEYEFLTPVEEAPK	P_00042	ARHGDIA
			AENFFILR	P_00046	ARPC4
			ELLLQPVTISR	P_00461	ARPC4
66	MGHHHHHHLEAARGYSFTTTAEKTFDQLTPEESKWIYEDVERLSDLLAPISEQIKVPTISINKDYLLCDYNRSDQQLDCALDLMRILHLLGQEGPKSIATLAITTLLKVFNETPINPRDAGPLLISLKDGGLICTSCRIIPGGIYNADLNDEWVQRQQTVGGVNYFFDVEVGR	19466.8	TFDQLTPEESK	P_01756	CALU
			WIYEDVER	P_02092	CALU
			LSDLLAPISEQIK	P_01285	CAP1
			VPTISINK	P_02011	CAP1
			DYLLCDYNR	P_00401	CAPZB
			SDQQLDCALDLMR	P_01562	CAPZB
			ILHLLGQEGPK	P_00998	COPG1
			SIATLAITTLLK	P_01610	COPG1
			VFNETPINPR	P_01919	COPG1
			DAGPLLISLK	P_00263	CORO1A
			DGGLICTSCR	P_00301	CORO1A
			IIPGGIYNADLNDEWVQR	P_00985	CST1
			QQTVGGVNYFFDVEVGR	P_01515	CST1
67	MGHHHHHHLEAARGYSFTTTAEKDAVEDLESVGKENAGEDPGLARLQMEAPHIIVGTPGRVLITTDLLARDLQFVEVTDVKNLQPASEYTVSLVAIKVDDNALQCLEEYLRYDISDMTSIARLTGFHETSNINDFSAGVANRLVLCEVFKGYEVHGIVRIYLGQLECFSLGNLDAKLWDLTTGTTTRVWQVTIGTR	21728	DAVEDLESVGK	P_00270	DCD
			ENAGEDPGLAR	P_00471	DCD
			LQMEAPHIIVGTPGR	P_01273	EIF4A1
			VLITTDLLAR	P_01978	EIF4A1
			DLQFVEVTDVK	P_00346	FN1
			NLQPASEYTVSLVAIK	P_01423	FN1
			VDDNALQCLEEYLR	P_01886	GCNT3
			YDISDMTSIAR	P_02111	GCNT3
			LTGFHETSNINDFSAGVANR	P_01307	GLUL
			LVLCEVFK	P_01333	GLUL
			GYEVHGIVR	P_00835	GMDS
			IYLGQLECFSLGNLDAK	P_01074	GMDS
			LWDLTTGTTTR	P_01348	GNB2L1
			VWQVTIGTR	P_02073	GNB2L1
68	MGHHHHHHLEAARGYSFTTTAEKTIQVDNTDAEGRLILADALCYAHTFNPKNAVHVNLFETPVEAQYVRNLFETPILARDGLILTSRVTVAGLAGKHWLVTDIKYQFFVYLQEGKDSPSVWAAVPGKSSFYVNGLTLGGQKYADLTEDQLPSCESLKDTIARGVNTFSPEGRLFQVEYAIEAIKQTYFLPVIGLVDAEKVDILDPALLR	23217.9	TIQVDNTDAEGR	P_01787	LAP3
			LILADALCYAHTFNPK	P_01194	LAP3
			NAVHVNLFETPVEAQYVR	P_01371	MFGE8
			NLFETPILAR	P_01418	MFGE8
			DGLILTSR	P_00304	PARK7
			VTVAGLAGK	P_02047	PARK7
			HWLVTDIK	P_00908	PEBP4
			YQFFVYLQEGK	P_02174	PEBP4
			DSPSVWAAVPGK	P_00376	PFN1
			SSFYVNGLTLGGQK	P_01686	PFN1
			YADLTEDQLPSCESLKDTIAR	P_02103	PGAM1
			GVNTFSPEGR	P_00825	PSMA5
			LFQVEYAIEAIK	P_01145	PSMA5
			QTYFLPVIGLVDAEK	P_01525	PSMC3
			VDILDPALLR	P_01888	PSMC3
69	MGHHHHHHLEAARGYSFTTTAEKTITLEVEPSDTIENVKESTLHLVLRCIESLIAVFQKALEAFETFKVAIEPGAPRGHQLQLDYFGACKNFSDNQLQEGKYGINTTDIFQTVDLWEGKGFQALGDAADIRSEEFLIAGKDVNAAIAAIKEIIDPVLDRALTVPELTQQVFDAKISVYYNEATGGK	20562.4	TITLEVEPSDTIENVK	P_01789	UBB
			ESTLHLVLR	P_00494	RPS27A
			CIESLIAVFQK	P_00234	S100A11
			ALEAFETFK	P_00109	SORD
			VAIEPGAPR	P_01870	SORD
			GHQLQLDYFGACK	P_00708	SPARCL1
			NFSDNQLQEGK	P_01384	TAGLN2
			YGINTTDIFQTVDLWEGK	P_02136	TAGLN2
			GFQALGDAADIR	P_00686	TIMP1
			SEEFLIAGK	P_01569	TIMP1
			DVNAAIAAIK	P_00388	TUBA4A
			EIIDPVLDR	P_00447	TUBA4A
			ALTVPELTQQVFDAK	P_00139	TUBB
			ISVYYNEATGGK	P_01047	TUBB
70	MGHHHHHHLEAARGYSFTTTAEKNNPSKPLHVIKYEYQPFAGKELSELSLLSLYGIHKSPIDTFPTDPIKIWQYVYSKTLFSNIVLSGGSTLFKADSQAQLLLSTVVGVFTAPGLHLKGVGTDEACLIEILASRSETDLLDIRGAGTDDSTLVRSEIDLVQIKEGVIIEILASRGIGTNEQAIIDVLTKILQEYITQQSNKYITQSGDYQLR	23411.2	NNPSKPLHVIK	P_01432	WDR1
			YEYQPFAGK	P_02124	WDR1
			ELSELSLLSLYGIHK	P_00467	ACPP
			SPIDTFPTDPIK	P_01658	ACPP
			IWQYVYSK	P_01070	ACTR1A
			TLFSNIVLSGGSTLFK	P_01797	ACTR1A
			ADSQAQLLLSTVVGVFTAPGLHLK	P_00037	AGT
			GVGTDEACLIEILASR	P_00818	ANXA11
			SETDLLDIR	P_01574	ANXA11
			GAGTDDSTLVR	P_00637	ANXA7
			SEIDLVQIK	P_01571	ANXA7
			EGVIIEILASR	P_00443	ANXA8
			GIGTNEQAIIDVLTK	P_00714	ANXA8
			ILQEYITQQSNK	P_01003	AP1M2
			YITQSGDYQLR	P_02146	AP1M2
71	MGHHHHHHLEAARGYSFTTTAEKDAVLLVFANKNISFTVWDVGGQDKNPEQEPIPIVLRWDDPYYDIARGPDFFTRQFPFLASIQNQGRVEHSDLSFSKVNHVTLSQPKDIQDSLTVSNEVQTAKFTITPSTTQVVGILKFLIDGFPRNQDNLQGWNKDLQHPNEFIRSLGEIPIVESEIK	20594.4	DAVLLVFANK	P_00271	ARF1
			NISFTVWDVGGQDK	P_01408	ARF1
			NPEQEPIPIVLR	P_01437	ARHGAP1
			WDDPYYDIAR	P_02083	ARHGAP1
			GPDFFTR	P_00762	AZU1
			QFPFLASIQNQGR	P_01499	AZU1
			VEHSDLSFSK	P_01904	B2M
			VNHVTLSQPK	P_01995	B2M
			DIQDSLTVSNEVQTAK	P_00327	CAPZA2
			FTITPSTTQVVGILK	P_00610	CAPZA2
			FLIDGFPR	P_00571	CMPK1
			NQDNLQGWNK	P_01445	CMPK1
			DLQHPNEFIR	P_00347	COPB1
			SLGEIPIVESEIK	P_01633	COPB1
72	MGHHHHHHLEAARGYSFTTTAEKSQVVAGTNYFIKVHVGDEDFVHLRLTLEDQATFIKVTIPTDLIASSGDIIKQATVGDINTERPGMLDFTGKMSQAEFEKWDAWNELKLLQAGFSELKYASNAVSEALIRGSAVHQLSEELRQVSASELHTSGILGPETLRINEAVECLLSLKLNLNNTVLSKVAVQGDVVRELGVGIALRTTQFSCTLGEK	23454	SQVVAGTNYFIK	P_01674	CSTB
			VHVGDEDFVHLR	P_01946	CSTB
			LTLEDQATFIK	P_01310	DAG1
			VTIPTDLIASSGDIIK	P_02037	DAG1
			QATVGDINTERPGMLDFTGK	P_01493	DBI
			MSQAEFEK	P_01362	DBI
			WDAWNELK	P_02082	DBI
			LLQAGFSELK	P_01233	DNPEP
			YASNAVSEALIR	P_02107	DNPEP
			GSAVHQLSEELR	P_00785	EPPK1
			QVSASELHTSGILGPETLR	P_01530	EPPK1
			INEAVECLLSLK	P_01013	EPRS
			LNLNNTVLSK	P_01250	EPRS
			VAVQGDVVR	P_01880	EPRS
			ELGVGIALR	P_00458	FABP5
			TTQFSCTLGEK	P_01840	FABP5
73	MGHHHHHHLEAARGYSFTTTAEKLQVVDQPLPVRSFYGSTLFLCRLIIWDSYTTNKSELEQLRQEAEQLRCFSLVESTYKTLFEDAGYLKFCETTIGSKGIDEGPEGLKFLVGPDGIPIMRQEPGENSEILPTLKAILNYIASKFLQPGSPRLNSYIQGKNQEQLLTLASILR	19546	LQVVDQPLPVR	P_01281	FASN
			SFYGSTLFLCR	P_01587	FASN
			LIIWDSYTTNK	P_01193	GNB2
			SELEQLRQEAEQLR	P_01573	GNB2
			CFSLVESTYK	P_00232	GNPTG
			TLFEDAGYLK	P_01794	GNPTG
			FCETTIGSK	P_00523	GPD1L
			GIDEGPEGLK	P_00712	GPD1L
			FLVGPDGIPIMR	P_00579	GPX3
			QEPGENSEILPTLK	P_01496	GPX3
			AILNYIASK	P_00092	GSTA2
			FLQPGSPR	P_00577	GSTA1
			LNSYIQGK	P_01255	HEBP2
			NQEQLLTLASILR	P_01446	HEBP2
74	MGHHHHHHLEAARGYSFTTTAEKGFGFVLFKIFVGGLSPDTPEEKQTQIFTTYSDNQPGVLIQVYEGERIDVVPIEPHALFLGIHGGKLQLEAVNITDLSENRILVVITDGEKLFTALFPFEKGALQYLVPILTQTLTKLAATNALLNSLEFTKALDLLDRICDFGLARNYLQSLPSKSLGPALLLLQKAFALWSAVTPLTFTR	22562	GFGFVLFK	P_00681	HNRNPD
			IFVGGLSPDTPEEK	P_00953	HNRNPD
			QTQIFTTYSDNQPGVLIQVYEGER	P_01523	HSPA1B
			IDVVPIEPHALFLGIHGGK	P_00936	IL1RN
			LQLEAVNITDLSENR	P_01272	IL1RN
			ILVVITDGEK	P_01008	ITGAM
			LFTALFPFEK	P_01147	ITGAM
			GALQYLVPILTQTLTK	P_00644	KPNB1
			LAATNALLNSLEFTK	P_01083	KPNB1
			ALDLLDR	P_00106	MAPK3
			ICDFGLAR	P_00929	MAPK3
			NYLQSLPSK	P_01485	MAPK3
			SLGPALLLLQK	P_01635	MMP9
			AFALWSAVTPLTFTR	P_00048	MMP9
75	MGHHHHHHLEAARGYSFTTTAEKQALAQISLPRVFFASWRIYGADDIELLPEAQHKVVGDVAYDEAKDVTALNVSTLKSLEPFTLEILARGGPTATSVTQGTHTTLVTRSIILEYHQDRDQGTYEDYVEGLREAFQLFDRIGIVGLPNVGKNYIVEDGDIIFFKTAPYVVTGSVDQTVKVWDYETGDFEREIVLADVIDNDSWRITSCIFQLLQEAGIK	24544.4	QALAQISLPR	P_01492	MPO
			VFFASWR	P_01913	MPO
			IYGADDIELLPEAQHK	P_01072	MTHFD1
			VVGDVAYDEAK	P_02059	MTHFD1
			DVTALNVSTLK	P_00393	MUC4
			SLEPFTLEILAR	P_01629	MUC4
			GGPTATSVTQGTHTTLVTR	P_00696	MUC5AC
			SIILEYHQDR	P_01616	MUC5AC
			DQGTYEDYVEGLR	P_00366	MYL6
			EAFQLFDR	P_00413	MYL6
			IGIVGLPNVGK	P_00965	OLA1
			NYIVEDGDIIFFK	P_01484	OLA1
			TAPYVVTGSVDQTVK	P_01727	PAFAH1B1
			VWDYETGDFER	P_02071	PAFAH1B1
			EIVLADVIDNDSWR	P_00450	PAICS
			ITSCIFQLLQEAGIK	P_01059	PAICS
76	MGHHHHHHLEAARGYSFTTTAEKGSFSEQGINEFLRTGEAIVDAALSALRDAEDVDLNHYRAIENIDTLTNLESLFLGKFEDENFILKVSFELFADKVNPTVFFDIAVDGEPLGRLFPDFFTRLVNVVLGAHNVRGYSFSLTTFSPSGKYNEDLELEDAIHTAILTLKGVLLYGPPGTGKIEELQLIVNDKCALGVFRLNILDTLSKYLYSSEDYIK	24262.3	GSFSEQGINEFLR	P_00790	PDIA6
			TGEAIVDAALSALR	P_01765	PDIA6
			DAEDVDLNHYR	P_00261	PPP1R7
			AIENIDTLTNLESLFLGK	P_00089	PPP1R7
			FEDENFILK	P_00527	PPIA
			VSFELFADK	P_02023	PPIA
			VNPTVFFDIAVDGEPLGR	P_01998	PPIA
			LFPDFFTR	P_01144	PRTN3
			LVNVVLGAHNVR	P_01338	PRTN3
			GYSFSLTTFSPSGK	P_00838	PSMA2
			YNEDLELEDAIHTAILTLK	P_02166	PSMA2
			GVLLYGPPGTGK	P_00822	PSMC5
			IEELQLIVNDK	P_00943	PSMC5
			CALGVFR	P_00223	PSMD2
			LNILDTLSK	P_01245	PSMD2
			YLYSSEDYIK	P_02164	PSMD2
77	MGHHHHHHLEAARGYSFTTTAEKVVDYTTAKLAIDYGIKLLLIGDSGVGKAADLNGDLTATRTFDQLTPDESKACPLDQAIGLLVAIFHKAFYAELYHIISSNLEKIEDGNDFGVAIQEKAQIWDTAGQERNILTEIYREFADSLGIPFLETSAKLVLVNAVYFRSGGGGDIHQGFQSLLTEVNK	20266.3	AFYAELYHIISSNLEK	P_00060	PSME2
			IEDGNDFGVAIQEK	P_00939	PSME2
			AQIWDTAGQER	P_00162	RAB11B
			NILTEIYR	P_01404	RAB11B
			EFADSLGIPFLETSAK	P_00434	RAB1A
			VVDYTTAK	P_02056	RAB1A
			LAIDYGIK	P_01092	RAB8B
			LLLIGDSGVGK	P_01226	RAB8B
			AADLNGDLTATR	P_00005	RCN1
			TFDQLTPDESK	P_01755	RCN1
			ACPLDQAIGLLVAIFHK	P_00026	S100A6
			LVLVNAVYFR	P_01336	SERPINB6
			SGGGGDIHQGFQSLLTEVNK	P_01596	SERPINB6
78	MGHHHHHHLEAARGYSFTTTAEKFVFGTTPEDILRTIVTTLQDSIRIIALDGDTKILATPPQEDAPSVDIANIRLISQIVSSITASLRTAFQEALDAAGDKVGEFSGANKILLAELEQLKQVQSLTCEVDALKENKPSIIFIDEIDSLCGSRLHLGTTQNSLTEADFRSIGVSNFNHRALQAAYGASAPSVTSAALRDNSLELSQLENKTDGSVNFFR	23619.1	FVFGTTPEDILR	P_00615	THBS1
			TIVTTLQDSIR	P_01791	THBS1
			IIALDGDTK	P_00975	TKT
			ILATPPQEDAPSVDIANIR	P_00991	TKT
			LISQIVSSITASLR	P_01198	TUBA1C
			TAFQEALDAAGDK	P_01724	TXN
			VGEFSGANK	P_01930	TXN
			ILLAELEQLK	P_01000	VIM
			QVQSLTCEVDALK	P_01529	VIM
			ENKPSIIFIDEIDSLCGSR	P_00476	VPS4B
			LHLGTTQNSLTEADFR	P_01184	VPS4B
			SIGVSNFNHR	P_01613	AKR1C2
			ALQAAYGASAPSVTSAALR	P_00125	AKR7A2
			DNSLELSQLENK	P_00358	ANGPTL1
			TDGSVNFFR	P_01743	ANGPTL1
79	MGHHHHHHLEAARGYSFTTTAEKFINLFPETKLVECLETVLNKEPCVESLVSQYFQTVTDYGKEQLTPLIKFLDLVPSLQLDPAQIYRLQAEVLECVSLVELTSLKSFPDFPTPGVVFRSFFTDDDKTLLGDGPVVTDPKASSEGGTAAGAGLDSLHKNSVSQISVLSGGKVALTGLTVAEYFRVVDLLAPYAKTEFWLISAPGEKVGTLDVLVGLSDELAK	24126.5	FINLFPETK	P_00562	AP2A1
			LVECLETVLNK	P_01323	AP2A1
			EPCVESLVSQYFQTVTDYGK	P_00479	APOA2
			EQLTPLIK	P_00485	APOA2
			FLDLVPSLQLDPAQIYR	P_00566	APOBEC3B
			LQAEVLECVSLVELTSLK	P_01261	APRT
			SFPDFPTPGVVFR	P_01582	APRT
			SFFTDDDK	P_01580	ARHGDIB
			TLLGDGPVVTDPK	P_01799	ARHGDIB
			ASSEGGTAAGAGLDSLHK	P_00180	ARPC1B
			NSVSQISVLSGGK	P_01460	ARPC1B
			VALTGLTVAEYFR	P_01872	ATP5B
			VVDLLAPYAK	P_02054	ATP5B
			TEFWLISAPGEK	P_01748	ATP6V1C1
			VGTLDVLVGLSDELAK	P_01938	ATP6V1C1
80	MGHHHHHHLEAARGYSFTTTAEKLLNVGFQEALKVAIIIPFRHFILDECDKVAVFFGGLSIKLQAVTDDHIRNDLSPTTVMSEGARFFGTFLPEVAKGFPLPTPARFSVLLLHGIRINAANYASVKFYALSASFEPFSNKVHVIFNYKFADDQLIIDFDNFVRSDGFSIETCK	19409	LLNVGFQEALK	P_01230	B4GALT1
			VAIIIPFR	P_01871	B4GALT1
			HFILDECDK	P_00854	DDX39B
			VAVFFGGLSIK	P_01879	DDX39B
			LQAVTDDHIR	P_01263	BLVRB
			NDLSPTTVMSEGAR	P_01375	BLVRB
			FFGTFLPEVAK	P_00539	BPI
			GFPLPTPAR	P_00685	BPI
			FSVLLLHGIR	P_00604	ABHD14B
			INAANYASVK	P_01009	ABHD14B
			FYALSASFEPFSNK	P_00623	CALR
			VHVIFNYK	P_01947	CALR
			FADDQLIIDFDNFVR	P_00515	CAPN2
			SDGFSIETCK	P_01556	CAPN2
81	MGHHHHHHLEAARGYSFTTTAEKNGSGTLDLEEFLRSLDADEFRDVQDSLTVSNEAQTAKFTITPPTAQVVGVLKLGFAGLVQEISFGTTKWVGGPEIELIAIATGGREGEEAGPGDPLLEAVPKLGPGGLDPVEVYESLPEELQKNVFDEAILAALEPPEPKTCLLISYTTNKTLTLLSVTRTIIVTELSPVVAKPQIKEVVDGLEKEWAMNVGDK	23339	NGSGTLDLEEFLR	P_01394	CAPS
			SLDADEFR	P_01626	CAPS
			DVQDSLTVSNEAQTAK	P_00390	CAPZA1
			FTITPPTAQVVGVLK	P_00609	CAPZA1
			LGFAGLVQEISFGTTK	P_01161	CCT5
			WVGGPEIELIAIATGGR	P_02097	CCT5
			EGEEAGPGDPLLEAVPK	P_00438	CDC37
			LGPGGLDPVEVYESLPEELQK	P_01172	CDC37
			NVFDEAILAALEPPEPK	P_01469	CDC42
			TCLLISYTTNK	P_01734	CDC42
			TLTLLSVTR	P_01809	CEACAM1
			TIIVTELSPVVAKPQIK	P_01782	CEACAM1
			EVVDGLEK	P_00506	COMT
			EWAMNVGDK	P_00508	COMT
82	MGHHHHHHLEAARGYSFTTTAEKFELALQLGELKTFEVCDLPVRLGFEEFKMFLVNSFLKENTQQHITARVSSFLPWIRAGCAVTSLLASELTKTAQNLSIFLGSFRATVFLAMGKLIESAEELIRSQALNAFGSGDYTAAIAFLDKGISPVPINLRHVFAIFNTEQRDFLPLVAKLGYSDITIFEK	20881.9	FELALQLGELK	P_00533	COPB2
			TFEVCDLPVR	P_01757	COPB2
			LGFEEFK	P_01163	CAPNS1
			MFLVNSFLK	P_01361	CAPNS1
			ENTQQHITAR	P_00477	CTSG
			VSSFLPWIR	P_02029	CTSG
			AGCAVTSLLASELTK	P_00065	DIAPH1
			TAQNLSIFLGSFR	P_01728	DIAPH1
			ATVFLAMGK	P_00194	DNAJC3
			LIESAEELIR	P_01191	DNAJC3
			SQALNAFGSGDYTAAIAFLDK	P_01664	DNAJC3
			GISPVPINLR	P_00723	DNM2
			HVFAIFNTEQR	P_00897	DNM2
			DFLPLVAK	P_00294	DPYD
			LGYSDITIFEK	P_01180	DPYD
83	MGHHHHHHLEAARGYSFTTTAEKIQSQFTDAQKYGDGIQLTRQFIQGPPEVIRVIELENWTEGKGVVQELQQAISKIASLEVENQSLRGTQGVVTNFEIFRNLFNVVDCKSNVCTLVRVVLGAHNLSREVIFSVEDGSVKTVAEGHGDTLYVGTTRDAEGILEDLQSYRDQPPNSVEGLLNALR	20429.4	IQSQFTDAQK	P_01038	DSP
			YGDGIQLTR	P_02130	DSP
			QFIQGPPEVIR	P_01498	ECHDC1
			VIELENWTEGK	P_01953	ECHDC1
			GVVQELQQAISK	P_00832	EEF1D
			IASLEVENQSLR	P_00925	EEF1D
			GTQGVVTNFEIFR	P_00807	EIF3B
			NLFNVVDCK	P_01419	EIF3B
			SNVCTLVR	P_01652	ELANE
			VVLGAHNLSR	P_02060	ELANE
			EVIFSVEDGSVK	P_00503	EML2
			TVAEGHGDTLYVGTTR	P_01844	EML2
			DAEGILEDLQSYR	P_00262	FAM49B
			DQPPNSVEGLLNALR	P_00368	FAM49B
84	MGHHHHHHLEAARGYSFTTTAEKIANLQTDLSDGLRVQVQDNEGCPVEALVKELGDHVTNLRNVNQSLLELHKFEGAIYRVDLGGFAGLFDLKGSLDDTEADVLGLVASGTPDVARGGVDHAAAFGRILTPLVSLDTPGKEYQLNDSAAYYLNDLERIAQSDYIPTQQDVLRAVLVNNITTGERLQQDVLQFQKGDVVNQDDLYQALASGKILDAAGANLK	23973.2	IANLQTDLSDGLR	P_00920	FLNA
			VQVQDNEGCPVEALVK	P_02019	FLNA
			ELGDHVTNLR	P_00456	FTH1
			NVNQSLLELHK	P_01472	FTH1
			FEGAIYR	P_00532	GART
			VDLGGFAGLFDLK	P_01891	GART
			GSLDDTEADVLGLVASGTPDVAR	P_00793	GGT6
			GGVDHAAAFGR	P_00700	GLOD4
			ILTPLVSLDTPGK	P_01005	GLOD4
			EYQLNDSAAYYLNDLER	P_00513	GNAI2
			IAQSDYIPTQQDVLR	P_00923	GNAI2
			AVLVNNITTGER	P_00208	GOLM1
			LQQDVLQFQK	P_01275	GOLM1
			GDVVNQDDLYQALASGK	P_00661	GRHPR
			ILDAAGANLK	P_00992	GRHPR
85	MGHHHHHHLEAARGYSFTTTAEKALLTPVAIAAGRLNAIYQNNLTKATENDIYNFFSPLNPVRITGEAFVQFASQELAEKELLENEFHQILKGPYESGSGHSSGLGHRDQVANSAFVERHIYYITGETKDISTNYYASQKEEASDYLELDTIKGVVDSDDLPLNVSRLAGLFNEQRLGNTISSLFGGGTTPDAK	21358.6	ALLTPVAIAAGR	P_00118	GSR
			LNAIYQNNLTK	P_01242	GSR
			ATENDIYNFFSPLNPVR	P_00187	HNRNPF
			ITGEAFVQFASQELAEK	P_01054	HNRNPF
			ELLENEFHQILK	P_00460	HRNR
			GPYESGSGHSSGLGHR	P_00772	HRNR
			DQVANSAFVER	P_00371	HSP90AA1
			HIYYITGETK	P_00871	HSP90AA1
			DISTNYYASQK	P_00329	HSP90B1
			EEASDYLELDTIK	P_00430	HSP90B1
			GVVDSDDLPLNVSR	P_00831	HSP90B1
			LAGLFNEQR	P_01089	HYOU1
			LGNTISSLFGGGTTPDAK	P_01171	HYOU1
86	MGHHHHHHLEAARGYSFTTTAEKFGWDCHGLPVEYEIDKFLIQNVLRSFSLGDIYFKTASSVIELTCTKLFCIPVHGIRSLLVTELGSSRLCSTEEETAELLSKVASEALARGSLLSEPAIQVRSVLAVENLLTLDRLFVQDLATRLYLVDLAGSEKAAFENWEVEVTFRNDYEFCAK	19983.1	FGWDCHGLPVEYEIDK	P_00552	IARS
			FLIQNVLR	P_00573	IARS
			SFSLGDIYFK	P_01583	IGF2R
			TASSVIELTCTK	P_01731	IGF2R
			LFCIPVHGIR	P_01137	IMPA1
			SLLVTELGSSR	P_01643	IMPA1
			LCSTEEETAELLSK	P_01108	INPP1
			VASEALAR	P_01877	INPP1
			GSLLSEPAIQVR	P_00795	KIF13B
			SVLAVENLLTLDR	P_01707	KIF13B
			LFVQDLATR	P_01148	KIF5B
			LYLVDLAGSEK	P_01355	KIF5B
			AAFENWEVEVTFR	P_00007	LMAN1
			NDYEFCAK	P_01378	LMAN1
87	MGHHHHHHLEAARGYSFTTTAEKDTDSSVASEVRSSSAGGQGSYVPLLRFAVEEIIQKNPDEEDNTFYQRAVLENNLGAAVLRVLVTGATGLLGRLLCGLLAERNYTPQLSEAEVERSISGAFPGIESKSLLAYDLGLTTKVFDINLKDLAQALLNAEKLELDAIELTRNVDMLSELVQEYDEPILKQVPNESFFNFFNPLK	22294.4	DTDSSVASEVR	P_00381	LSR
			SSSAGGQGSYVPLLR	P_01695	LSR
			FAVEEIIQK	P_00520	LXN
			NPDEEDNTFYQR	P_01435	LXN
			AVLENNLGAAVLR	P_00207	MAT2B
			VLVTGATGLLGR	P_01990	MAT2B
			LLCGLLAER	P_01209	MIF
			NYTPQLSEAEVER	P_01488	MMP8
			SISGAFPGIESK	P_01619	MMP8
			SLLAYDLGLTTK	P_01640	MNDA
			VFDINLK	P_01910	MNDA
			DLAQALLNAEK	P_00331	AXDND1
			LELDAIELTR	P_01129	AXDND1
			NVDMLSELVQEYDEPILK	P_01468	NAP1L4
			QVPNESFFNFFNPLK	P_01528	NAP1L4
88	MGHHHHHHLEAARGYSFTTTAEKNSQSFFSGLFGGSSKVAGYAALLEQYQKGWMDWAAHKLDPTQTSFLKIVSLPECFNSPYGAKLALIQLQISSIKDLELLIQTATRLVTLEEFLASTQRIITLTGPTNAIFKLVVPATQCGSLIGKDFEQPLAISRTTQQIDLQGPGPWGFRGNDISSGTVLSDYVGSGPPKLYTLVLTDPDAPSR	22635.6	NSQSFFSGLFGGSSK	P_01457	NAPA
			VAGYAALLEQYQK	P_01868	NAPA
			GWMDWAAHK	P_00833	NDRG2
			LDPTQTSFLK	P_01119	NDRG2
			IVSLPECFNSPYGAK	P_01068	NIT2
			LALIQLQISSIK	P_01097	NIT2
			DLELLIQTATR	P_00336	NUCB1
			LVTLEEFLASTQR	P_01343	NUCB1
			IITLTGPTNAIFK	P_00986	PCBP1
			LVVPATQCGSLIGK	P_01347	PCBP1
			DFEQPLAISR	P_00290	PDLIM1
			TTQQIDLQGPGPWGFR	P_01841	PDLIM1
			GNDISSGTVLSDYVGSGPPK	P_00748	PEBP1
			LYTLVLTDPDAPSR	P_01360	PEBP1
89	MGHHHHHHLEAARGYSFTTTAEKFNISNGGPAPEAITDKLSGTGSAGATIRTQAYQDQKPGTSGLRIATSLDGFDVASVQQQRSEEWADNHLPLTDAELARIYALPDDLVEVKPKSISTSLPVLDLIDAIAPNAVRLASVPGSQTVVVKADGELNVDSLITRGVSFTFGADVVSKTFTDCFNCLPIAAIVDEKIVIGLFGKNVVTIFSAPNYCYRYSFLQFDPAPRETIPLQETSLYTQDRLQQGYNAMGFSQGGQFLR	28019.1	FNISNGGPAPEAITDK	P_00584	PGM1
			LSGTGSAGATIR	P_01293	PGM1
			TQAYQDQKPGTSGLR	P_01820	PGM1
			IATSLDGFDVASVQQQR	P_00927	PLIN3
			SEEWADNHLPLTDAELAR	P_01570	PLIN3
			IYALPDDLVEVKPK	P_01071	PLS1
			SISTSLPVLDLIDAIAPNAVR	P_01620	PLS1
			LASVPGSQTVVVK	P_01105	PODXL
			ADGELNVDSLITR	P_00032	PPP1CB
			GVSFTFGADVVSK	P_00828	PPP1CB
			TFTDCFNCLPIAAIVDEK	P_01761	PPP1CB
			IVIGLFGK	P_01066	PPIC
			NVVTIFSAPNYCYR	P_01478	PPP2CA
			YSFLQFDPAPR	P_02181	PPP2CA
			ETIPLQETSLYTQDR	P_00498	PPT1
			LQQGYNAMGFSQGGQFLR	P_01276	PPT1
90	MGHHHHHHLEAARGYSFTTTAEKQITLNDLPVGRVSVADHSLHLSKLLADPTGAFGKVNLAELFKNQYDNDVTVWSPQGRNVSIGIVGKHYGFQLYQSDPSGNYGGWKTTIFSPEGRLLDSSTVTHLFKLYQVEYAFKLTVEDPVTVEYITRNYTDEAIETDDLTIKALQSVGQIVGEVLKEVIELPLTNPELFQR	21942.2	QITLNDLPVGR	P_01502	PRDX4
			VSVADHSLHLSK	P_02031	PRDX4
			LLADPTGAFGK	P_01205	PRDX5
			VNLAELFK	P_01997	PRDX5
			NQYDNDVTVWSPQGR	P_01450	PSMA1
			NVSIGIVGK	P_01473	PSMA1
			HYGFQLYQSDPSGNYGGWK	P_00912	PSMA4
			TTIFSPEGR	P_01836	PSMA4
			LLDSSTVTHLFK	P_01215	PSMA6
			LYQVEYAFK	P_01358	PSMA6
			LTVEDPVTVEYITR	P_01318	PSMA7
			NYTDEAIETDDLTIK	P_01487	PSMA7
			ALQSVGQIVGEVLK	P_00131	PSMC6
			EVIELPLTNPELFQR	P_00502	PSMC6
91	MGHHHHHHLEAARGYSFTTTAEKLYENFISEFEHRQLTFEEIAKIVENSDAVTEILNNAELLKTIAEIFGNPNYLRHQTLQGVAFPISRYLLSQSSPAPLTAAEEELREAATQAQQTLGSTIDKLNLHYAVVSKNNEEYLALIFEKSALYSPSDPLTLLQADTVRGNVGFVFTKGTIEILSDVQLIKGLGLDDALEPRTQGFLALFSGDTGEIK	23744.2	LYENFISEFEHR	P_01354	PSMD13
			QLTFEEIAK	P_01509	PSMD13
			IVENSDAVTEILNNAELLK	P_01063	PSMD5
			TIAEIFGNPNYLR	P_01777	PSMD5
			HQTLQGVAFPISR	P_00885	TWF1
			YLLSQSSPAPLTAAEEELR	P_02158	TWF1
			EAATQAQQTLGSTIDK	P_00409	QARS
			LNLHYAVVSK	P_01249	QARS
			NNEEYLALIFEK	P_01429	QSOX1
			SALYSPSDPLTLLQADTVR	P_01545	QSOX1
			GNVGFVFTK	P_00759	RPLP0
			GTIEILSDVQLIK	P_00803	RPLP0
			GLGLDDALEPR	P_00734	RUVBL2
			TQGFLALFSGDTGEIK	P_01824	RUVBL2
92	MGHHHHHHLEAARGYSFTTTAEKELPGFLQSGKVLMEKELPGFLQSGKDLGGFDEDAEPRYSEFFTGSKASIPFSVVGSNQLIEAKSTLINSLFLTDLYPERNLEGYVGFANLPNQVYRVNIIPLIAKELIQTSALNFLTPLRGSIFVVFDSIESAKLTTDFNVIVEALSKAIDLFTDAIKVAAIEALNDGELQKESSYGPEIDSHDFVLRYVFDNWLQGHGR	24767.7	ELPGFLQSGK	P_00462	S100P
			VLMEKELPGFLQSGK	P_01980	S100P
			DLGGFDEDAEPR	P_00340	SDF4
			YSEFFTGSK	P_02179	SDF4
			ASIPFSVVGSNQLIEAK	P_00177	SEPT2
			STLINSLFLTDLYPER	P_01701	SEPT2
			NLEGYVGFANLPNQVYR	P_01415	SEPT7
			VNIIPLIAK	P_01996	SEPT7
			ELIQTSALNFLTPLR	P_00459	SH3GLB1
			GSIFVVFDSIESAK	P_00792	SSB
			LTTDFNVIVEALSK	P_01317	SSB
			AIDLFTDAIK	P_00087	ST13
			VAAIEALNDGELQK	P_01862	ST13
			ESSYGPEIDSHDFVLR	P_00493	ST3GAL1
			YVFDNWLQGHGR	P_02195	ST3GAL1
93	MGHHHHHHLEAARGYSFTTTAEKEASSCAVNLVLRNGVLEEAIIATILKDADLTDTAQTRVVADGAGLPGEDWVFVSSKAITTSLTTKILETTTFFQRFGDFVLKSGLSSPIYIDLRAVTELNEPLSNEDRNCNDFQYESKNDVSNPQGTLQDGTSRGSAADSEESPAIEAIHLLRLAEVALAYAKDINTFIHGNKYTHFLTQHYDAKPQGR	23249.6	EASSCAVNLVLR	P_00420	STK39
			NGVLEEAIIATILK	P_01396	STK39
			DADLTDTAQTR	P_00260	TSTA3
			VVADGAGLPGEDWVFVSSK	P_02051	TSTA3
			AITTSLTTK	P_00095	UGGT1
			ILETTTFFQR	P_00995	UGGT1
			FGDFVLK	P_00545	UMPS
			SGLSSPIYIDLR	P_01599	UMPS
			AVTELNEPLSNEDR	P_00211	YWHAH
			NCNDFQYESK	P_01372	YWHAH
			NDVSNPQGTLQDGTSR	P_01377	ADH1A
			GSAADSEESPAIEAIHLLR	P_00783	ALAD
			LAEVALAYAK	P_01088	ALAD
			DINTFIHGNK	P_00325	ANG
			YTHFLTQHYDAKPQGR	P_02191	ANG
94	MGHHHHHHLEAARGYSFTTTAEKAYSLFSYNTQGRDNELLVYKFYAYNPLAGGLLTGKALFEEVPELLTEAEKTLFGLHLSQKDFFLANASRLVFVHSAEGNEFWSALLEKYLGQDYEQLRDSIVAELDRWEAAEGLLQEALDKALHFVISEYNKIIEGGIYDADLNDERLAACVNLIPQITSIYEWKTQSSLVPALTDFVR	22935.5	AYSLFSYNTQGR	P_00220	APCS
			DNELLVYK	P_00354	APCS
			FYAYNPLAGGLLTGK	P_00624	AKR7A2
			ALFEEVPELLTEAEK	P_00113	ATIC
			TLFGLHLSQK	P_01795	ATIC
			DFFLANASR	P_00291	CAPN1
			LVFVHSAEGNEFWSALLEK	P_01325	CAPN1
			YLGQDYEQLR	P_02155	CAPN1
			DSIVAELDR	P_00375	COPE
			WEAAEGLLQEALDK	P_02084	COPE
			ALHFVISEYNK	P_00114	CST2
			IIEGGIYDADLNDER	P_00977	CST2
			LAACVNLIPQITSIYEWK	P_01080	CUTA
			TQSSLVPALTDFVR	P_01827	CUTA
95	MGHHHHHHLEAARGYSFTTTAEKIGASTLLSDIERIGFKPAGGIRAYSSFGGGRDDFNSGFRTNTNEFLIDVDKVNVTVEDERDNENVVNEYSSELEKEDGGGWWYNRSFSWALDFCKTELVAWAVSNWKPDSARFLVGPDGVPLRLITWSPVCRGFGFVTFDDHDPVDK	19107.2	IGASTLLSDIER	P_00956	DERA
			IGFKPAGGIR	P_00962	DERA
			AYSSFGGGR	P_00221	EIF4H
			DDFNSGFR	P_00279	EIF4H
			TNTNEFLIDVDK	P_01814	F3
			VNVTVEDER	P_02004	F3
			DNENVVNEYSSELEK	P_00355	FGB
			EDGGGWWYNR	P_00426	FGB
			SFSWALDFCK	P_01584	FUT3
			TELVAWAVSNWKPDSAR	P_01750	FUT3
			FLVGPDGVPLR	P_00580	GPX1
			LITWSPVCR	P_01201	GPX1
			GFGFVTFDDHDPVDK	P_00682	HNRNPA2B1
96	MGHHHHHHLEAARGYSFTTTAEKFFADLLDYIKVIGGDDLSTLTGKIEWLESHQDADIEDFKNQLTSNPENTVFDAKAIVAIENPADVSVISSRYVDIAIPCNNKDVHSLSEYFSLLTRGPFSVEADPSRENGLHSVHVRLEPAALGALPLLRAILPCQDTPSVKLTYTAEVSVPKFIDVPTLCEMLSYTPSSSKTLSQWIAENQDSLGSK	23235.6	FFADLLDYIK	P_00537	HPRT1
			VIGGDDLSTLTGK	P_01954	HPRT1
			IEWLESHQDADIEDFK	P_00948	HSPA5
			NQLTSNPENTVFDAK	P_01448	HSPA5
			AIVAIENPADVSVISSR	P_00096	RPSA
			YVDIAIPCNNK	P_02192	RPSA
			DVHSLSEYFSLLTR	P_00387	LFNG
			GPFSVEADPSR	P_00765	LFNG
			ENGLHSVHVR	P_00474	LRRC26
			LEPAALGALPLLR	P_01132	LRRC26
			AILPCQDTPSVK	P_00093	LTA4H
			LTYTAEVSVPK	P_01320	LTA4H
			FIDVPTLCEMLSYTPSSSK	P_00557	MPI
			TLSQWIAENQDSLGSK	P_01807	MPI
97	MGHHHHHHLEAARGYSFTTTAEKNMAQFSVLLPRYVDTPFGKPSDALILGKEISLWFKPEELVDYKNIIHGSDSVKEGHLSPDIVAEQKIQILEGWKAFGFSHLEALLDDSKIQQEIAVQNPLVSERELFSPLHALNFGIGGDTTRVYAILTHGIFSGPAISRDGVVFGVEKHVGMAVAGLLADARSQAYADYIGFILTLNEGVKFGSLLPIHPVTSG	23837.3	NMAQFSVLLPR	P_01426	MTAP
			YVDTPFGKPSDALILGK	P_02193	MTAP
			EISLWFKPEELVDYK	P_00449	NME2
			NIIHGSDSVK	P_01403	NME2
			EGHLSPDIVAEQK	P_00440	NQO1
			IQILEGWK	P_01032	NQO1
			AFGFSHLEALLDDSK	P_00050	OTUB1
			IQQEIAVQNPLVSER	P_01034	OTUB1
			ELFSPLHALNFGIGGDTTR	P_00454	PAFAH1B2
			VYAILTHGIFSGPAISR	P_02075	PRPS1L1
			DGVVFGVEK	P_00313	PSMA3
			HVGMAVAGLLADAR	P_00900	PSMA3
			SQAYADYIGFILTLNEGVK	P_01665	PPP2R4
			FGSLLPIHPVTSG	P_00550	PPP2R4
98	MGHHHHHHLEAARGYSFTTTAEKAAVESLGFILFRNAQAIEDMVGYAQETQHEKDHPPIPITDLADNIERYSIGGLSPFSEYAFRDTFNHLTTWLEDARTASNVEEAFINTAKALDVNVALREFEEDLTGIDDRNQNTFLRAAGVNVEPFWPGLFAKLQCTYIEVEQVSKNISNQLSIGTDISAQHPELRLEEHYELRLNIGYIEDLK	23599.7	AAVESLGFILFR	P_00019	PSMD1
			NAQAIEDMVGYAQETQHEK	P_01370	PSMD1
			DHPPIPITDLADNIER	P_00321	PTPRF
			YSIGGLSPFSEYAFR	P_02182	PTPRF
			DTFNHLTTWLEDAR	P_00382	RAB2A
			TASNVEEAFINTAK	P_01730	RAB2A
			ALDVNVALR	P_00108	RBP1
			EFEEDLTGIDDR	P_00435	RBP1
			NQNTFLR	P_01449	RNASE3
			AAGVNVEPFWPGLFAK	P_00010	RPLP1
			LQCTYIEVEQVSK	P_01264	SCRN2
			NISNQLSIGTDISAQHPELR	P_01410	SCRN2
			LEEHYELR	P_01123	SERPINB2
			LNIGYIEDLK	P_01244	SERPINB2
99	MGHHHHHHLEAARGYSFTTTAEKVLSSIEQKYLAEVATGDDKGDVTAQIALQPALKGELLEAIKPALNLIYKSPLHYYGNATMSLMNKLSLEHLNPSIYVGLRTYIDLIFPDCLAPRHGVCFLAADTRVLEDGTPFWSGPKDFFTPNLFLKTENNDADYPWPRAVTEQGAELSNEERSICTTVLELLDK	21085.6	VLSSIEQK	P_01988	SFN
			YLAEVATGDDK	P_02149	SFN
			GDVTAQIALQPALK	P_00660	SOD2
			GELLEAIK	P_00668	SOD2
			PALNLIYK	P_01489	ST3GAL6
			SPLHYYGNATMSLMNK	P_01659	ST3GAL6
			LSLEHLNPSIYVGLR	P_01295	TCN2
			TYIDLIFPDCLAPR	P_01857	TCN2
			HGVCFLAADTR	P_00863	UBA7
			VLEDGTPFWSGPK	P_01970	UBA7
			DFFTPNLFLK	P_00292	UPK1B
			TENNDADYPWPR	P_01752	UPK1B
			AVTEQGAELSNEER	P_00212	YWHAQ
			SICTTVLELLDK	P_01611	YWHAQ
100	MGHHHHHHLEAARGYSFTTTAEKLCQDLGPGAFRYVYIAELLAHKLGNQEPGGQTALKNQGNTWLTAFVLKLFVYDPNNPPSSEVLRVVAEGFDSANGINISPDDKYGAATFTRIFFYDSENPPASEVLRIICAQQCSGRLTQLGTFEDHFLSLQRSSGLPNIPVQTISRTVLWPNGLSLDIPAGRVSASPLLYTLIEKVFFTDYGQIPK	23163.75	LCQDLGPGAFR	P_01107	SERPINF2
			YVYIAELLAHK	P_02198	PON1
			LGNQEPGGQTALK	P_01170	SERPINF2
			NQGNTWLTAFVLK	P_01447	PZP
			LFVYDPNNPPSSEVLR	P_01149	PON2
			VVAEGFDSANGINISPDDK	P_02052	PON2
			YGAATFTR	P_02129	PZP
			IFFYDSENPPASEVLR	P_00952	PON1
			IICAQQCSGR	P_00976	EGFR
			LTQLGTFEDHFLSLQR	P_01314	EGFR
			SSGLPNIPVQTISR	P_01687	TFRC
			TVLWPNGLSLDIPAGR	P_01850	LRP1
			VSASPLLYTLIEK	P_02022	TFRC
			VFFTDYGQIPK	P_01914	LRP1
101	MGHHHHHHLEAARGYSFTTTAEKIAQYYYTFKVLHGDLIDFVCKIHIGSSFEKDHEELSLVASEAVRSAGSVESPSVSSTHRTICESSGIWSNPSPICQKVELAPLPSWQPVGKASVSVTAEDEGTQRGSVAIWSGKPPICEKSGFTYVLHEGECCGRGTYLTDETHRHIVTFDGQNFKGYFYIPPLATHTICDRFLNVLSPR	22464	IAQYYYTFK	P_00924	F13B
			VLHGDLIDFVCK	P_01974	F13B
			IHIGSSFEK	P_00973	CPB2
			DHEELSLVASEAVR	P_00318	CPB2
			SAGSVESPSVSSTHR	P_01543	IGFBP3
			TICESSGIWSNPSPICQK	P_01778	SELL
			VELAPLPSWQPVGK	P_01907	ICAM1
			ASVSVTAEDEGTQR	P_00181	ICAM1
			GSVAIWSGKPPICEK	P_00798	CD46
			SGFTYVLHEGECCGR	P_01595	VWF
			GTYLTDETHR	P_00811	CD46
			HIVTFDGQNFK	P_00870	VWF
			GYFYIPPLATHTICDR	P_00836	CD46
			FLNVLSPR	P_00574	IGFBP3
102	MGHHHHHHLEAARGYSFTTTAEKHEALSPFYSERDYSHYYTTIQDLRAALEDTLAETEARSGCNHPDLDVQYRNWGLGGHAFCRTTLSGAPCQPWASEATYRLSGCQNITSTKIGVYSPVHCIKSHSGGELESLARHNLFEPEDTGQRSLSLLNCEEIKSQFEGFVKIVGGWECEKAVATVGPISVAIDAGHESFLFYKVFQEPLFYEAPR	23580.3	HEALSPFYSER	P_00847	PLAT
			DYSHYYTTIQDLR	P_00403	KRT19
			AALEDTLAETEAR	P_00012	KRT19
			SGCNHPDLDVQYR	P_01590	PLAUR
			NWGLGGHAFCR	P_01479	F12
			TTLSGAPCQPWASEATYR	P_01838	F12
			LSGCQNITSTK	P_01290	IFNAR1
			IGVYSPVHCIK	P_00969	IFNAR1
			SHSGGELESLAR	P_01609	PDGFB
			HNLFEPEDTGQR	P_00881	KLK2
			SLSLLNCEEIK	P_01646	CD40LG
			SQFEGFVK	P_01668	CD40LG
			IVGGWECEK	P_01065	KLK2
			AVATVGPISVAIDAGHESFLFYK	P_00197	CTSL
			VFQEPLFYEAPR	P_01920	CTSL
103	MGHHHHHHLEAARGYSFTTTAEKVEEEIQTLSQVLAAKASAAFSSVGSVITKVGGTSDVEVNEKNAGVEGSLIVEKFLPGQGLVLYPQIGDKFQEFSPNLWGLEFQKVFDVNDKNSCNNFIYGGCRAYIFSIDEKSQHTTEVVGGAPQHEQIGKALTFELTLRVIPGPPALTLVPAELVRDTGAFDAVGEVEAWHR	21291.7	VEEEIQTLSQVLAAK	P_01901	TPD52
			ASAAFSSVGSVITK	P_00171	TPD52
			VGGTSDVEVNEK	P_01934	HSPD1
			NAGVEGSLIVEK	P_01365	HSPD1
			FLPGQGLVLYPQIGDK	P_00575	EFNB2
			FQEFSPNLWGLEFQK	P_00588	EFNB2
			VFDVNDK	P_01911	EFNA5
			NSCNNFIYGGCR	P_01451	SPINT2
			AYIFSIDEK	P_00218	ITGA4
			SQHTTEVVGGAPQHEQIGK	P_01670	ITGA4
			ALTFELTLR	P_00135	CSF1R
			VIPGPPALTLVPAELVR	P_01956	CSF1R
			DTGAFDAVGEVEAWHR	P_00383	WISP1
104	MGHHHHHHLEAARGYSFTTTAEKSVACDVGYPALKLHTLGDNLLDSRFTPFTLGKALSNVEGFERDILAQSPAAEPLKLNLSENYTLSISNARYCDPNLGLRQYLINSQCCSLCQPGQKTTINNEYNYRLAADDPEVRHSHALVSLSFLKYFFNVSDEAALLEKNGYPDLIVGAFGVDRSSASFNVIEFPYK	21346.5	SVACDVGYPALK	P_01704	ITGA2
			LHTLGDNLLDSR	P_01187	LAMB1
			FTPFTLGK	P_00611	EFNA1
			ALSNVEGFER	P_00134	ITGA2
			DILAQSPAAEPLK	P_00324	LAMB1
			LNLSENYTLSISNAR	P_01251	ALCAM
			YCDPNLGLR	P_02109	CD40
			QYLINSQCCSLCQPGQK	P_01535	CD40
			TTINNEYNYR	P_01837	IGF1R
			LAADDPEVR	P_01081	EFNA1
			HSHALVSLSFLK	P_00890	IGF1R
			YFFNVSDEAALLEK	P_02127	ITGA2
			NGYPDLIVGAFGVDR	P_01397	ITGAV
			SSASFNVIEFPYK	P_01678	ITGAV
105	MGHHHHHHLEAARGYSFTTTAEKIYGPFCECDNFSCARAVGLAGTFRLQDLYSIVRANHSGAVVLLKLWNSTFLEEYSKGFEPGVTNILKAAAITSDILEALGRDVTFNIICKWTSPEAIAYRHVLTLTDQVTRVVQCSDLGLDKVSPGAFTPLVKIGDTVSFSIEAKYTFEVQAVNGVSGKIEEVIGAGEFGEVCRGSFKPSEHVKPR	22836.6	IYGPFCECDNFSCAR	P_01073	ITGB5
			AVGLAGTFR	P_00204	COL18A1
			LQDLYSIVR	P_01266	COL18A1
			ANHSGAVVLLK	P_00144	ITGA6
			LWNSTFLEEYSK	P_01349	ITGA6
			GFEPGVTNILK	P_00679	POSTN
			AAAITSDILEALGR	P_00002	POSTN
			DVTFNIICK	P_00394	EPHA3
			WTSPEAIAYR	P_02096	EPHA3
			HVLTLTDQVTR	P_00905	ITGB3
			VVQCSDLGLDK	P_02065	DCN
			VSPGAFTPLVK	P_02028	DCN
			IGDTVSFSIEAK	P_00959	ITGB3
			YTFEVQAVNGVSGK	P_02189	EPHB3
			IEEVIGAGEFGEVCR	P_00944	EPHB3
			GSFKPSEHVKPR	P_00789	IL4R
106	MGHHHHHHLEAARGYSFTTTAEKDYTGEDVTPQNFLAVLRGESLFHSKLQTFASNWRVNHAVLAVGYGEKFVTAVGTQGAISKSFEGNNNYDTPELRLLESSLSSSEGEEPVEYKVIQDCEDENIQRFSIAILGSYNRDLDGNGYPDLIVGSFGVDKTQDNSCSFGLHARLLYSGVPFLGPYHK	20374.9	DYTGEDVTPQNFLAVLR	P_00406	LGMN
			GESLFHSK	P_00676	EPCAM
			LQTFASNWR	P_01279	CTSH
			VNHAVLAVGYGEK	P_01994	CTSH
			FVTAVGTQGAISK	P_00620	NRP1
			SFEGNNNYDTPELR	P_01579	NRP1
			LLESSLSSSEGEEPVEYK	P_01218	ITGA5
			VIQDCEDENIQR	P_01958	ITGA1
			FSIAILGSYNR	P_00598	ITGA1
			DLDGNGYPDLIVGSFGVDK	P_00332	ITGA5
			TQDNSCSFGLHAR	P_01822	ST14
			LLYSGVPFLGPYHK	P_01241	ST14
107	MGHHHHHHLEAARGYSFTTTAEKYLYLASNHSNKEALAIVFFGRVQTLEAWVIHGGR HVDCQSVWDAFKSFVYGGCLGNKSSFISVLQTSSSSLRAFIDPLGLPDRPFYRLTVTSQNLQLENLRVIEEFYNQTWVHRSETVLTCATGREAGNPGSLFGYSVALHR	18560.3	YLYLASNHSNK	P_02163	AOC3
			EALAIVFFGR	P_00417	AOC3
			VQTLEAWVIHGGR	P_02018	CD38
			HVDCQSVWDAFK	P_00896	CD38
			SFVYGGCLGNK	P_01586	SPINT1
			SSFISVLQTSSSSLR	P_01685	CD82
			AFIDPLGLPDRPFYR	P_00052	FOLH1
			LTVTSQNLQLENLR	P_01319	CD74
			VIEEFYNQTWVHR	P_01952	SLC2A1
			SETVLTCATGR	P_01575	ITGA3
			EAGNPGSLFGYSVALHR	P_00414	ITGA3
108	MGHHHHHHLEAARGYSFTTTAEKVYEEVLSVTPNDGFAKLGIYDADGDGDFDVDDAKFYSLLDPSYAKNCQTLVNLCSRGLLCEENIDDCARTGYANVTIYKQAEISASAPTSLRSVNDLYIQKYEITTIHNLFRFIHNENGANYSVTATRIALGGLLFPASNLRTGIYQVLNGSRDYSQPTAAATVQDIKIPDENCQINR	22260.9	VYEEVLSVTPNDGFAK	P_02076	ASPH
			LGIYDADGDGDFDVDDAK	P_01167	ASPH
			FYSLLDPSYAK	P_00630	STT3A
			NCQTLVNLCSR	P_01373	NOTCH2
			GLLCEENIDDCAR	P_00739	NOTCH2
			TGYANVTIYK	P_01770	IL1RL1
			QAEISASAPTSLR	P_01491	SHBG
			SVNDLYIQK	P_01711	SERPIND1
			YEITTIHNLFR	P_02117	SERPIND1
			FIHNENGANYSVTATR	P_00560	IL1RL1
			IALGGLLFPASNLR	P_00919	SHBG
			TGIYQVLNGSR	P_01768	LAMP3
			DYSQPTAAATVQDIK	P_00404	LAMP3
			IPDENCQINR	P_01024	GPNMB
109	MGHHHHHHLEAARGYSFTTTAEKTLLSDLVAQYVAKYGLIQAAAVATSRVSSSGGLQNAQFGIRVFEVHVRPKGNETLHYETFGKFFPFGLVQLSSDLSKSSEPTEDVEPKLEQLGGLLANVSGELGGRTVSCVLEDGVETYVKLAPGTIVEVWKEAVIAQISSHVKHYEGLSYNVDSLHQKVLALLDVPDKQVSTVVCVHEPR	22204.4	TLLSDLVAQYVAK	P_01801	PLXNB1
			YGLIQAAAVATSR	P_02137	PLXNB1
			VSSSGGLQNAQFGIR	P_02030	NAGPA
			VFEVHVRPK	P_01912	ICAM2
			GNETLHYETFGK	P_00752	ICAM2
			FFPFGLVQLSSDLSK	P_00541	SIAE
			SSEPTEDVEPK	P_01684	TGOLN2
			LEQLGGLLANVSGELGGR	P_01134	EMILIN1
			TVSCVLEDGVETYVK	P_01851	EMILIN1
			LAPGTIVEVWK	P_01100	HEXB
			EAVIAQISSHVK	P_00422	ADAM10
			HYEGLSYNVDSLHQK	P_00911	ADAM10
			VLALLDVPDK	P_01962	IMPAD1
			QVSTVVCVHEPR	P_01531	NAGPA
110	MGHHHHHHLEAARGYSFTTTAEKGQFNAFSYHFRDHGIPPYHDYRFYLFGLTRSLGFCDTTNKGEQGEPGAPGIRGVGDDQLGEESEEREGTSLGEVGGPDLKVSIYDTKFEDNGIYFCQQKVTFELTYEELLKGHVSFKPSLDQQRTDDQDIYKITQTAEGLDPENYLSIKLDGSTNFTRVANLTFVVNSLDGK	21937.5	GQFNAFSYHFR	P_00776	PXDN
			DHGIPPYHDYR	P_00319	PXDN
			FYLFGLTR	P_00625	CD1C
			SLGFCDTTNK	P_01634	C1QA
			GEQGEPGAPGIR	P_00673	C1QA
			GVGDDQLGEESEER	P_00817	M6PR
			EGTSLGEVGGPDLK	P_00442	NID2
			VSIYDTK	P_02025	CD2
			FEDNGIYFCQQK	P_00530	CD79B
			VTFELTYEELLK	P_02035	ITIH3
			GHVSFKPSLDQQR	P_00710	ITIH3
			TDDQDIYK	P_01741	CD2
			ITQTAEGLDPENYLSIK	P_01057	NID2
			LDGSTNFTR	P_01113	FGL2
			VANLTFVVNSLDGK	P_01873	FGL2
111	MGHHHHHHLEAARGYSFTTTAEKAYDADSSDIDKYNEAVHVEPVRAIHLDLEEYRVFQYIDLHQDEFVQTLKDGNSSLIAAVAEVRVYGTCFCDQACRCVCPPGHSGAKSLQITYSLFRLASDGATWADIFKHPDAVAWANLTNAIRTCWTTLPQFRYSDVIAGQFYGHTHRHYQPYAPPRNLHYDTFLVIR	21898.6	AYDADSSDIDK	P_00216	FAT1
			YNEAVHVEPVR	P_02165	WNT7A
			AIHLDLEEYR	P_00091	CNDP1
			VFQYIDLHQDEFVQTLK	P_01922	CNDP1
			DGNSSLIAAVAEVR	P_00306	JAG1
			VYGTCFCDQACR	P_02077	SBSPON
			CVCPPGHSGAK	P_00253	JAG1
			SLQITYSLFR	P_01645	MILR1
			LASDGATWADIFK	P_01102	PLBD2
			HPDAVAWANLTNAIR	P_00882	PLBD2
			TCWTTLPQFR	P_01737	WNT7A
			YSDVIAGQFYGHTHR	P_02178	SMPDL3A
			HYQPYAPPR	P_00913	CD28
			NLHYDTFLVIR	P_01421	LMAN2L
112	MGHHHHHHLEAARGYSFTTTAEKVDERPCIDQLLYSQDKYLLYDVNPPEGFNLRGTEDFIVESLDASFRVAYDLVYYVRHVSHGEELRYEWKPHGAWEEPSLGVLKYSEIEPSTEGEVIYRALEFLQLHNGRIADVTSGLIGGEDGRGATTSPGVYELSSRFVNSTGYLTEAEKYHYNGTLLDGTSFDTSYSKLQEGQTLEFLVASVPK	23615.5	VDERPCIDQLLYSQDK	P_01887	POFUT2
			YLLYDVNPPEGFNLR	P_02159	POFUT2
			GTEDFIVESLDASFR	P_00801	SSR1
			VAYDLVYYVR	P_01882	FCGBP
			HVSHGEELR	P_00906	PODXL2
			YEWKPHGAWEEPSLGVLK	P_02122	CD22
			YSEIEPSTEGEVIYR	P_02180	LAMB2
			ALEFLQLHNGR	P_00111	GPLD1
			IADVTSGLIGGEDGR	P_00915	GPLD1
			GATTSPGVYELSSR	P_00647	FCGBP
			FVNSTGYLTEAEK	P_00618	SUMF1
			YHYNGTLLDGTSFDTSYSK	P_02144	FKBP10
			LQEGQTLEFLVASVPK	P_01268	LAMB2
113	MGHHHHHHLEAARGYSFTTTAEKAFLLTPRLDHLHVEVTASNSKDHLISVTPDSIRIAIIGAGIGGTSAAYYLRSDFYDIVLVATPLNRGNFLELSAAASAPAEKGFVEDLDESFKNSDLLLLVDTHKEVHSGVSTDPQPLKAYLDELVELHRAKPVTQIVSAEAWGREALGCHIEQATKAGWLATEAQVTQELKDGLCVPR	21995.2	AFLLTPR	P_00054	APOM
			LDHLHVEVTASNSK	P_01114	ITIH5
			DHLISVTPDSIR	P_00320	ITIH5
			IAIIGAGIGGTSAAYYLR	P_00918	PCYOX1
			SDFYDIVLVATPLNR	P_01555	PCYOX1
			GNFLELSAAASAPAEK	P_00753	VWA1
			GFVEDLDESFK	P_00689	TMX3
			NSDLLLLVDTHK	P_01453	CASC4
			EVHSGVSTDPQPLK	P_00501	TRBC1
			AYLDELVELHR	P_00219	MLLT3
			AKPVTQIVSAEAWGR	P_00098	TRBC1
			EALGCHIEQATK	P_00418	TUT1
			AGWLATEAQVTQELK	P_00080	TUT1
			DGLCVPR	P_00303	APOM
114	MGHHHHHHLEAARGYSFTTTAEKGIQVLPDGRALEESNYELEGKATGDPYYLEVGKSLLEGEGSSGGGGRHLNQGTDEDIYLLGKYEELQVTVGRVDLLNQEIEFLKGNGGVYGWDLKLGVNDCVLRFIEAGQFNDNLYGTSIQSVRNSSYFVEWIPNNVKALQGASQIIAEIRINVYYNEATGGNYVPR	20998.4	GIQVLPDGR	P_00721	CNOT2
			ALEESNYELEGK	P_00110	KRT10
			ATGDPYYLEVGK	P_00188	EDEM3
			SLLEGEGSSGGGGR	P_01641	KRT10
			HLNQGTDEDIYLLGK	P_00876	ST6GAL1
			YEELQVTVGR	P_02116	KRT2
			VDLLNQEIEFLK	P_01892	KRT2
			GNGGVYGWDLK	P_00754	DPM1
			LGVNDCVLR	P_01175	DLG3
			FIEAGQFNDNLYGTSIQSVR	P_00558	DLG3
			NSSYFVEWIPNNVK	P_01458	TUBB4A
			ALQGASQIIAEIR	P_00129	DNM1L
			INVYYNEATGGNYVPR	P_01021	TUBB4A
115	MGHHHHHHLEAARGYSFTTTAEKVLQENNEGLRSHQIEELEQQIEKGGPDFSNLEKHFGYEFHYENNNVDKLEHIDGVNLTVPVKEILISSSVDIHLKCTSQAIYTEHFGKNFNLPASHYYKNAELDGFPQLRDLEDFFSAVGKAFASVSDLIDIGKFLSPVQHLFNIRILSIAAEVAKHSGLYVCSVRDTPVELLAPLPPYFSR	23197.6	VLQENNEGLR	P_01984	KIF20B
			SHQIEELEQQIEK	P_01607	KIF20B
			GGPDFSNLEK	P_00694	NUDCD2
			HFGYEFHYENNNVDK	P_00853	ALKBH8
			LEHIDGVNLTVPVK	P_01127	RPUSD3
			EILISSSVDIHLK	P_00448	BEND2
			CTSQAIYTEHFGK	P_00252	C14orf39
			NFNLPASHYYK	P_01383	KSR2
			NAELDGFPQLR	P_01364	KSR2
			DLEDFFSAVGK	P_00335	RBM23
			AFASVSDLIDIGK	P_00049	ZNF781
			FLSPVQHLFNIR	P_00578	ZNF781
			ILSIAAEVAK	P_01004	IQCB1
			HSGLYVCSVR	P_00889	PSG1
			DTPVELLAPLPPYFSR	P_00385	RPUSD3
116	MGHHHHHHLEAARGYSFTTTAEKQWYESHYALPLGRISSLLEEQFQQGKVNESSLNWPQLENIGNFIKGSYGDLGGPIITTQVTIPKIILDLISESPIKYAVQLINALIQDPAKYNTSQQVIQDLNKEHGSQFFYLPIIKTLNSNDPVQNVVQVLEKLELDLHGLRVFLQGPAPVGTPSFNRLIEGVLDFKALQPIVSEEEWAHTK	23201	QWYESHYALPLGR	P_01534	RPS8
			ISSLLEEQFQQGK	P_01045	RPS8
			VNESSLNWPQLENIGNFIK	P_01993	CNN3
			GSYGDLGGPIITTQVTIPK	P_00799	HNRNPK
			IILDLISESPIK	P_00982	HNRNPK
			YAVQLINALIQDPAK	P_02108	ANKHD1
			YNTSQQVIQDLNK	P_02169	PMFBP1
			EHGSQFFYLPIIK	P_00446	KIF13A
			TLNSNDPVQNVVQVLEK	P_01802	KIF13A
			LELDLHGLR	P_01130	PMFBP1
			VFLQGPAPVGTPSFNR	P_01917	ANKHD1
			LIEGVLDFK	P_01190	CRAT
			ALQPIVSEEEWAHTK	P_00130	CRAT
117	MGHHHHHHLEAARGYSFTTTAEKHHLSEAAAQGRDAALFDEFVRTLISAHPIIRFFQDNNSLFQNTVASRSGNQVSEYISRTHQELQEFLLKSEVVVPAPKPADGKVDVFYNGENSPVHKNFILDQTNVSAAAQRSSGPTSLFAVTVAPPGARNSWGPEWGSNGYVKNVVALDTEVASNRLQAAQLPHTGVFGQSFSCPSDRGVQVNYDLALK	23276.59	HHLSEAAAQGR	P_00865	GLS2
			DAALFDEFVR	P_00259	CCDC37
			TLISAHPIIR	P_01798	TTLL6
			FFQDNNSLFQNTVASR	P_00543	TTLL6
			SGNQVSEYISR	P_01600	PDE4C
			THQELQEFLLK	P_01774	ZCCHC2
			SEVVVPAPKPADGK	P_01576	ZCCHC2
			VDVFYNGENSPVHK	P_01897	C12orf65
			NFILDQTNVSAAAQR	P_01380	HNRNPU
			SSGPTSLFAVTVAPPGAR	P_01689	HNRNPU
			NSWGPEWGSNGYVK	P_01461	CTSV
			NVVALDTEVASNR	P_01477	LDLR
			LQAAQLPHTGVFGQSFSCPSDR	P_01260	CD68
			GVQVNYDLALK	P_00826	SEL1L
118	MGHHHHHHLEAARGYSFTTTAEKYFEQLLEEERNYFEGTGYARTNTLLGHLISKDGVTGPGFTLSGSCCQGSRGLDLHGLLAFIQLQQCAQDRFTPPVVNVTWLRVEHWGLDEPLLKYWTAANSWGPAWGERFQEYILALADVPSSPYGVKLTIYNANIEDAGIYRYIFGAQVAPATKIYSGILNLSDITKIYPGVDFGGEELNVTFVK	23330.7	YFEQLLEEER	P_02125	P4HA2
			NYFEGTGYAR	P_01482	LAMA3
			TNTLLGHLISK	P_01813	LAMA3
			DGVTGPGFTLSGSCCQGSR	P_00312	LYPD3
			GLDLHGLLAFIQLQQCAQDR	P_00727	LYPD3
			FTPPVVNVTWLR	P_00612	HLA-DRA
			VEHWGLDEPLLK	P_01905	HLA-DRA
			YWTAANSWGPAWGER	P_02199	TINAGL1
			FQEYILALADVPSSPYGVK	P_00589	NCAM2
			LTIYNANIEDAGIYR	P_01309	NCAM2
			YIFGAQVAPATK	P_02145	PCDH9
			IYSGILNLSDITK	P_01076	KLKB1
			IYPGVDFGGEELNVTFVK	P_01075	KLKB1
119	MGHHHHHHLEAARGYSFTTTAEKQIDLLTYCNLVHGRWSVIVIPDVTVSDSGLYRVLHNGTLAELQGLPHIRINVGGGLSGDHCKGGSSGWSGGLAQNRLEHQFAVGEDSGRWFSAGLASNSSWLRATLDVVAGEAAGLSCRQLTWFYTFDQKLDPQSGALYISKQLGPQPQDIIYYEDGVVPTTDR	20386.1	QIDLLTYCNLVHGR	P_01501	CD226
			WSVIVIPDVTVSDSGLYR	P_02095	CD226
			VLHNGTLAELQGLPHIR	P_01975	TPBG
			INVGGGLSGDHCK	P_01019	C8A
			GGSSGWSGGLAQNR	P_00698	C8A
			LEHQFAVGEDSGR	P_01128	MAN2B1
			WFSAGLASNSSWLR	P_02089	PTGDS
			ATLDVVAGEAAGLSCR	P_00191	CD1D
			QLTWFYTFDQK	P_01510	CD48
			LDPQSGALYISK	P_01118	CD48
			QLGPQPQDIIYYEDGVVPTTDR	P_01505	CD7
120	MGHHHHHHLEAARGYSFTTTAEKLSQAQGNLSVLETRFQPVGTVEFHDLVTFTRSDFSNEERIIGGSDADIKSSNNPHSPIVEEFQVPYNKTASDAGFPVGSHVQYRIVSPEPGGAVGPNLTCRAAPDITGHKVIAGQFFGHHHTDSFRFRPDGLPKGALGGLDFLSVKGPGGVWAAKFHYLTFVPSAEDFYDCRVYAALGNHDFHPK	22706.2	LSQAQGNLSVLETR	P_01298	IGSF3
			FQPVGTVEFHDLVTFTR	P_00593	IGSF3
			SDFSNEER	P_01554	C1S
			IIGGSDADIK	P_00979	C1S
			SSNNPHSPIVEEFQVPYNK	P_01693	C1S
			TASDAGFPVGSHVQYR	P_01729	SEZ6L2
			IVSPEPGGAVGPNLTCR	P_01069	SEZ6L2
			AAPDITGHK	P_00016	NPTN
			VIAGQFFGHHHTDSFR	P_01949	SMPDL3B
			FRPDGLPK	P_00595	SAA4
			GALGGLDFLSVK	P_00642	CD1B
			GPGGVWAAK	P_00768	SAA4
			FHYLTFVPSAEDFYDCR	P_00555	HLA-DPA1
			VYAALGNHDFHPK	P_02074	SMPDL3B
121	MGHHHHHHLEAARGYSFTTTAEKYTCLPGYVRLSLEIEQLELQRVDLEDFENNTAYAKDLGPTLANSTHHNVRFVTHVSDWGALATISTLEAVRLHGGSAPLPQDRINCELSQGCSLHLAQRNFVDSPIIVDITKYHLGAYTGDDVRGNEEGYFGTRVTYLQNGKAVVFLEPQWYSVLEKVTYYLDWIHHYVPK	22023.94	YTCLPGYVR	P_02188	C4BPA
			LSLEIEQLELQR	P_01296	C4BPA
			VDLEDFENNTAYAK	P_01890	MFAP4
			DLGPTLANSTHHNVR	P_00341	GBA
			FVTHVSDWGALATISTLEAVR	P_00621	CREG1
			LHGGSAPLPQDR	P_01182	SORL1
			INCELSQGCSLHLAQR	P_01011	SORL1
			NFVDSPIIVDITK	P_01386	GBA
			YHLGAYTGDDVR	P_02143	TPSB2
			GNEEGYFGTR	P_00750	FBLN2
			VTYLQNGK	P_02049	FCGR3B
			AVVFLEPQWYSVLEK	P_00213	FCGR3B
			VTYYLDWIHHYVPK	P_02050	TPSB2
122	MGHHHHHHLEAARGYSFTTTAEKANDTSYIRLDFTGNLIEDIEDGTFSKLIQEAPKPECEKWEAAHVAEQLRGYYNQSEAGSHTVQRQTLQNASETVKAANDPFTIVHGNTGKCINQLLCKLPTDSELAPRSFEDLTDHPVTRNIYLNSGLTSTKSEDYVELVQRTSLTVVLLR	19511.6	ANDTSYIR	P_00142	OGN
			LDFTGNLIEDIEDGTFSK	P_01112	OGN
			LIQEAPKPECEK	P_01196	C4BPB
			WEAAHVAEQLR	P_02085	HLA-A
			GYYNQSEAGSHTVQR	P_00840	HLA-A
			QTLQNASETVK	P_01522	LY75
			AANDPFTIVHGNTGK	P_00014	LY75
			CINQLLCK	P_00236	SEPP1
			LPTDSELAPR	P_01259	SEPP1
			SFEDLTDHPVTR	P_01578	ADAM17
			NIYLNSGLTSTK	P_01413	ADAM17
			SEDYVELVQR	P_01568	PLOD3
			TSLTVVLLR	P_01831	ICAM3
123	MGHHHHHHLEAARGYSFTTTAEKVAAVSTHVALGAYAPLTKFISVGYVDDTQFVRATDPAAFPGEARAPWVEQEGPEYWDRNLEWIAGGTWTPSALKGICECGVCKLGAILTPNDGRSQWNNDNPLFKEVIGTGYGILDQKIGFGSFVEKNFSSPILARNFVINVVNRISVTQPDSIVGIVAVDKTQDEILFSNSTRIIIEELPK	22454.4	VAAVSTHVALGAYAPLTK	P_01864	IHH
			FISVGYVDDTQFVR	P_00564	HLA-C
			ATDPAAFPGEAR	P_00185	C1orf159
			APWVEQEGPEYWDR	P_00159	HLA-C
			NLEWIAGGTWTPSALK	P_01417	COL6A2
			GICECGVCK	P_00711	ITGB1
			LGAILTPNDGR	P_01151	ITGB2
			SQWNNDNPLFK	P_01675	ITGB2
			EVIGTGYGILDQK	P_00504	CNPY3
			IGFGSFVEK	P_00961	ITGB1
			NFSSPILAR	P_01385	SLAMF7
			NFVINVVNR	P_01387	COL6A2
			ISVTQPDSIVGIVAVDK	P_01046	CD109
			TQDEILFSNSTR	P_01821	CD109
			IIIEELPK	P_00980	CTHRC1
124	MGHHHHHHLEAARGYSFTTTAEKDCQELFQVGERFINYNQTVSRHLLIGLPSGAILSLPKYDIITTPAERHCFYGLQPDSEYKSDLAVEAGAPYAERFENQTGFPPPDSRNTTDTLITLDTSRLNNAPVAGYEGDVGSKGVEFSLIGESTIRYSSCPEPIVPGGYKYIVHLGQHNLQKADLGALELWRWLLTAAHCLKPR	22236.1	DCQELFQVGER	P_00274	ANGPTL4
			FINYNQTVSR	P_00563	EMC1
			HLLIGLPSGAILSLPK	P_00875	EMC1
			YDIITTPAER	P_02110	FAM174B
			HCFYGLQPDSEYK	P_00843	COL14A1
			SDLAVEAGAPYAER	P_01559	IGSF8
			FENQTGFPPPDSR	P_00534	VCAN
			NTTDTLITLDTSR	P_01466	VCAN
			LNNAPVAGYEGDVGSK	P_01252	ST3GAL4
			GVEFSLIGESTIR	P_00815	CR2
			YSSCPEPIVPGGYK	P_02183	CR2
			YIVHLGQHNLQK	P_02147	KLK11
			ADLGALELWR	P_00034	SORT1
			WLLTAAHCLKPR	P_02094	KLK11
125	MGHHHHHHLEAARGYSFTTTAEKEQHLYYQDQLLPVSRITCAEEGWSPTPKVNVEGIHCDRLLELDPEHQRINHGILYDEEKTVVTYHIPQNSSLENVDSRINHADFATVQLRLFNVTPQDEQKTGDIVEFVCKLADFFTNCQPESRGHLHLLETSIDGILADVKCIHNTAGIYCDQCK	20455.9	EQHLYYQDQLLPVSR	P_00483	TPSAB1
			ITCAEEGWSPTPK	P_01051	CFHR2
			VNVEGIHCDR	P_02002	LAMA2
			LLELDPEHQR	P_01217	P4HA1
			INHGILYDEEK	P_01015	CFHR2
			TVVTYHIPQNSSLENVDSR	P_01856	ICOSLG
			INHADFATVQLR	P_01014	LAMA2
			LFNVTPQDEQK	P_01143	ICOSLG
			TGDIVEFVCK	P_01764	CFHR2
			LADFFTNCQPESR	P_01084	GFRA1
			GHLHLLETSIDGILADVK	P_00706	LAMC2
			CIHNTAGIYCDQCK	P_00235	LAMC2
126	MGHHHHHHLEAARGYSFTTTAEKGTWDHGASDVSLYRGVIYKPATKGQEAFVPGFNIEELLPERIGTFCSNGTVSRTYQPWQFFASSKEYESYSDFERSPLNDFQVLRGTANTTTAGVPCQRSDLEVAHYKLVGGPVAGGDPNQTIRESEYHYEYTACDSTGSRAAGDVDIGDAAYYFERYAEEELEQVRLTEPQHGLGSQR	22525.65	GTWDHGASDVSLYR	P_00809	COL12A1
			GVIYKPATK	P_00821	CA12
			GQEAFVPGFNIEELLPER	P_00774	CA12
			IGTFCSNGTVSR	P_00967	CDCP1
			TYQPWQFFASSK	P_01860	LAMA5
			EYESYSDFER	P_00511	C8B
			SPLNDFQVLR	P_01660	MST1
			GTANTTTAGVPCQR	P_00800	MST1
			SDLEVAHYK	P_01560	C8B
			LVGGPVAGGDPNQTIR	P_01326	LAMA5
			ESEYHYEYTACDSTGSR	P_00490	KIAA1324
			AAGDVDIGDAAYYFER	P_00008	TACSTD2
			YAEEELEQVR	P_02104	STIM1
			LTEPQHGLGSQR	P_01304	STIM1
127	MGHHHHHHLEAARGYSFTTTAEKYTCICYEGYRCVDIDECTQVQHLCSQGRVLDFHNLPDGITKQLYPASAFPEDFSILTTVKDFHINLFRGQCIKPLFGAVTKTGCTDINECEIGAHNCGKDEELIHLDGKVFLTVPSLSSTAEEKTLFPVVLEQLDDYNAKDGSAQSGVDYYPK	19661.4	YTCICYEGYR	P_02187	LTBP1
			CVDIDECTQVQHLCSQGR	P_00254	LTBP1
			VLDFHNLPDGITK	P_01967	COL5A1
			QLYPASAFPEDFSILTTVK	P_01513	COL5A1
			DFHINLFR	P_00293	C2
			GQCIKPLFGAVTK	P_00773	FBN1
			TGCTDINECEIGAHNCGK	P_01763	FBN1
			DEELIHLDGK	P_00285	FRAS1
			VFLTVPSLSSTAEEK	P_01918	LAMA4
			TLFPVVLEQLDDYNAK	P_01796	LAMA4
			DGSAQSGVDYYPK	P_00308	FRAS1
128	MGHHHHHHLEAARGYSFTTTAEKLIPLLLQLTSRVLPGDYEILATHPTWALKLVVFPTDDISLKLVLSDLHLLTQSQVRSSCISQHVISEAKVSGPWEEADAEAVARSVNPNDTCLASCVKSLEVGDNDLVYISHRLVPLGVFTGLSNLTKVFSTVFQVPSTKITASYEDRTHVEEGDIVYRVGELTNLTQIELR	21566.2	LIPLLLQLTSR	P_01195	NOMO3
			VLPGDYEILATHPTWALK	P_01982	NOMO3
			LVVFPTDDISLK	P_01345	L1CAM
			LVLSDLHLLTQSQVR	P_01335	L1CAM
			SSCISQHVISEAK	P_01679	LTBP4
			VSGPWEEADAEAVAR	P_02024	LTBP4
			SVNPNDTCLASCVK	P_01712	TSPAN13
			SLEVGDNDLVYISHR	P_01632	LINGO2
			LVPLGVFTGLSNLTK	P_01339	LINGO2
			VFSTVFQVPSTK	P_01924	OR1A1
			ITASYEDR	P_01050	F11R
			THVEEGDIVYR	P_01776	LRRC8A
			VGELTNLTQIELR	P_01932	LRRC8A
129	MGHHHHHHLEAARGYSFTTTAEKHSADICAVPAESHIYRGGTPGHHLLPLRNPNGTVTVISRSTVPTDFSSAKEGETIIELKDNLQLPLQFLSRIPELEEAELFAEGQGRAVFQANQENLPILKVYWELTDLNQIKQWVPVLQDFSNKGEPSNEPSTETNKGHQDLDPDNEGELRSQLLCYGLWDHEEDSPSK	21649.7	HSADICAVPAESHIYR	P_00887	CD37
			GGTPGHHLLPLR	P_00699	S1PR2
			NPNGTVTVISR	P_01440	PVRL1
			STVPTDFSSAK	P_01703	CD47
			EGETIIELK	P_00439	CD47
			DNLQLPLQFLSR	P_00357	NPC1
			IPELEEAELFAEGQGR	P_01025	PIEZO1
			AVFQANQENLPILK	P_00202	ATP1A1
			VYWELTDLNQIK	P_02079	ITFG1
			QWVPVLQDFSNK	P_01533	ITFG1
			GEPSNEPSTETNK	P_00671	SLC39A10
			GHQDLDPDNEGELR	P_00707	SLC39A10
			SQLLCYGLWDHEEDSPSK	P_01673	PIEZO1
130	MGHHHHHHLEAARGYSFTTTAEKSDPTSYAGYIEDLKLFIYNPTTGEFLGRSHGGIYVCRANGIVVPSTIFDPSELQDLSSKSIIIHTSEDGKLDNYSTQELGKVLPVGDEVVGIVGYTSKDLWTAPEHLRGTLEYLQLNTTDKQYNSTGDYRVSLENYFSLLNEKGNVTQHVQGHRLYQPYGDSAGSLHSTSRGNELSLVLLNASTGELK	23304.5	SDPTSYAGYIEDLK	P_01561	ATP1B3
			LFIYNPTTGEFLGR	P_01142	ATP1B3
			SHGGIYVCR	P_01604	CD79A
			ANGIVVPSTIFDPSELQDLSSK	P_00143	SLC22A5
			SIIIHTSEDGK	P_01615	CNR1
			LDNYSTQELGK	P_01117	NT5E
			VLPVGDEVVGIVGYTSK	P_01983	NT5E
			DLWTAPEHLR	P_00350	GUCY2C
			GTLEYLQLNTTDK	P_00804	GUCY2C
			QYNSTGDYR	P_01536	TSPAN6
			VSLENYFSLLNEK	P_02026	TSPAN6
			GNVTQHVQGHR	P_00760	SLC39A14
			LYQPYGDSAGSLHSTSR	P_01356	CELSR2
			GNELSLVLLNASTGELK	P_00751	CELSR2
131	MGHHHHHHLEAARGYSFTTTAEKNLFPSNLVVAAFRVVTQNSSSGNVTHEKLLEGETLSVQCSYKYLLQDDAQAKGLNPGTLNILVRGLTDSIHRFATVNILPEVENDRSTEPELIQVKLSAFVFPGELLLRLFGGLILDIKLAPAVLLTGLTEVPVPTRGGPEDGGLGALRTANDAVELHIKISWAGDLDKDYTGCSTSESLSPVK	22348.6	NLFPSNLVVAAFR	P_01420	SLC1A4
			VVTQNSSSGNVTHEK	P_02069	SLC1A4
			LLEGETLSVQCSYK	P_01216	TREML2
			YLLQDDAQAK	P_02157	TREML2
			GLNPGTLNILVR	P_00741	PTPRK
			GLTDSIHR	P_00745	CD53
			FATVNILPEVENDR	P_00519	RNF19A
			STEPELIQVK	P_01698	SLC1A5
			LSAFVFPGELLLR	P_01282	SLC1A5
			LFGGLILDIK	P_01140	SLC4A7
			LAPAVLLTGLTEVPVPTR	P_01099	SLC4A7
			GGPEDGGLGALR	P_00695	S1PR4
			TANDAVELHIK	P_01726	PTGFRN
			ISWAGDLDK	P_01048	MPZL1
			DYTGCSTSESLSPVK	P_00405	MPZL1
132	MGHHHHHHLEAARGYSFTTTAEKVHLDIQVGEHANDYAEIAAKQLVEQVEQIQKIVINTVPQLHSEKAANYTSSLNLPDKVLEAVNGTDARNVTHLLQQELTEAQKAAGFISVLKTFIEINQIFTKHVGWEGAKNWQLTEEDFGNTSGRLDAVYLNKFLGIFNTGLKINATDADEPNTLNSKSEIQFLISDNQGFSCPEK	22277.2	VHLDIQVGEHANDYAEIAAK	P_01941	TMED9
			QLVEQVEQIQK	P_01511	TMED9
			IVINTVPQLHSEK	P_01067	SEMA4D
			AANYTSSLNLPDK	P_00015	SEMA4D
			VLEAVNGTDAR	P_01969	MPZL2
			NVTHLLQQELTEAQK	P_01476	BST2
			AAGFISVLK	P_00009	SLC2A5
			TFIEINQIFTK	P_01760	SLC2A5
			HVGWEGAK	P_00901	SLC7A1
			NWQLTEEDFGNTSGR	P_01480	SLC7A1
			LDAVYLNK	P_01110	TSHR
			FLGIFNTGLK	P_00569	TSHR
			INATDADEPNTLNSK	P_01010	DSG2
			SEIQFLISDNQGFSCPEK	P_01572	DSG2
133	MGHHHHHHLEAARGYSFTTTAEKDLGDEYGWKVEGCFNQLLYDIRAGPNGTLFVADAYKVTFNSALAQKSGEEALIIPPDAVAVDCKVDSYVEKLSCADTTRSYHTPGQDKNNIISTVQPGAFLGLGELKYNGTVGLWRSGIAWWTDYHVKDDAQLSGLPSALRSSAFGTLNWFTKFVGYPGDPVYWLGKIGCLTSETFQGLPR	22409	DLGDEYGWK	P_00339	TM9SF3
			VEGCFNQLLYDIR	P_01902	TSPAN1
			AGPNGTLFVADAYK	P_00074	APMAP
			VTFNSALAQK	P_02036	ITM2B
			SGEEALIIPPDAVAVDCK	P_01591	ITM2B
			VDSYVEK	P_01895	SLC39A8
			LSCADTTR	P_01284	OR2AJ1
			SYHTPGQDK	P_01718	OR2AJ1
			NNIISTVQPGAFLGLGELK	P_01430	GPR124
			YNGTVGLWR	P_02167	CLDND1
			SGIAWWTDYHVK	P_01597	TMEM30B
			DDAQLSGLPSALR	P_00278	TMEM30B
			SSAFGTLNWFTK	P_01677	ANO6
			FVGYPGDPVYWLGK	P_00617	ANO6
			IGCLTSETFQGLPR	P_00957	GPR124
134	MGHHHHHHLEAARGYSFTTTAEKFESIIHEFDPWFNYRLYACEVTHQGLSSPVTKSEAAHQGVITWNPPQRNDNAEGIIEFDPKYANITVDYLYNKYPYVGILHVRWWAASPAPARTLNSSGLPFGSYTFEKSADCYNEIYNFKNGDVSQFPYVEFTGRNGLVNSEVHNEDGRGDPSVISVNGTDFTFRAEEVELYLEK	22702.9	FESIIHEFDPWFNYR	P_00535	STT3B
			LYACEVTHQGLSSPVTK	P_01350	GPR98
			SEAAHQGVITWNPPQR	P_01566	PTPRC
			NDNAEGIIEFDPK	P_01376	GPR98
			YANITVDYLYNK	P_02106	PTPRC
			YPYVGILHVR	P_02172	LEMD2
			WWAASPAPAR	P_02100	LEMD2
			TLNSSGLPFGSYTFEK	P_01803	TMEM2
			SADCYNEIYNFK	P_01540	TMEM87A
			NGDVSQFPYVEFTGR	P_01390	TMEM106B
			NGLVNSEVHNEDGR	P_01392	TMEM106B
			GDPSVISVNGTDFTFR	P_00658	TMEM2
			AEEVELYLEK	P_00041	TMEM87A
135	MGHHHHHHLEAARGYSFTTTAEKAHPVFYQGTYSQALNDAKNTLCAPEVISLINTRGDAGENTALLEAGRVAQFQFQVEDRDAQASAAPAAPLPERFYLYPDITRHDGQLAVSKDLVSGLFSFSSCPFSRTSSFLDQRHLLENSTASVSEAERGEQPLLLTNAELKVAPPGLTQIPQIQKSYEAYVLNIVRLDDFVETGDIRDWGPALLEHR	23430.7	AHPVFYQGTYSQALNDAK	P_00084	FAF2
			NTLCAPEVISLINTR	P_01464	FAF2
			GDAGENTALLEAGR	P_00652	RNF149
			VAQFQFQVEDR	P_01875	FREM2
			DAQASAAPAAPLPER	P_00267	SLC29A1
			FYLYPDITR	P_00626	SLC6A6
			HDGQLAVSK	P_00845	SIRPG
			DLVSGLFSFSSCPFSR	P_00349	ENTPD2
			TSSFLDQR	P_01833	ECE1
			HLLENSTASVSEAER	P_00874	ECE1
			GEQPLLLTNAELK	P_00675	SLC22A23
			VAPPGLTQIPQIQK	P_01874	ATP1B1
			SYEAYVLNIVR	P_01716	ATP1B1
			LDDFVETGDIR	P_01111	SCARB2
			DWGPALLEHR	P_00399	SLC6A9
136	MGHHHHHHLEAARGYSFTTTAEKGEASNPDFGKSVAGIGQTGKILGGIPGPIAFGWVIDKSHDVYWDIEGAVRGLSPGNYSVRDDNEECGDICPGTAKITDNELELYKVELPGTAVPSVPEDAAPASRLPDAAEPCLPGALFRASLPYSQISGLNALQLRIILIHTLAKTFHDLEGNAVKEELGARPDATKTLPPLPPGPTPAQQPGR	22007.12	GEASNPDFGK	P_00663	SLCO4A1
			SVAGIGQTGK	P_01705	SCARB1
			ILGGIPGPIAFGWVIDK	P_00996	SLCO4A1
			SHDVYWDIEGAVR	P_01603	PIGS
			GLSPGNYSVR	P_00743	INSR
			DDNEECGDICPGTAK	P_00282	INSR
			ITDNELELYK	P_01052	SLC12A2
			VELPGTAVPSVPEDAAPASR	P_01909	SLC12A2
			LPDAAEPCLPGALFR	P_01257	ITGAL
			ASLPYSQISGLNALQLR	P_00179	PIGS
			IILIHTLAK	P_00983	ERMP1
			TFHDLEGNAVK	P_01758	ERMP1
			EELGARPDATK	P_00431	ITGAL
			TLPPLPPGPTPAQQPGR	P_01804	FAM174A
137	MGHHHHHHLEAARGYSFTTTAEKGVAIGQTSLTASVTNKAVDPSSVALVTLGSSKNITDLVEGAKTCNPETFPSSNESRAEHQQDSEDLFKSSLEELHGDANWGEDLRNISIHQAYQQCKVDTQSLDLLSSAARVHLDIQVGEHANNYPEIAAKQLLDQVEQIQKSSLQPITTLGKYTCIAGNSCNIKYGENNSLSVEGFR	21858.7	GVAIGQTSLTASVTNK	P_00812	NUP210
			AVDPSSVALVTLGSSK	P_00198	NUP210
			NITDLVEGAK	P_01411	SLC44A2
			TCNPETFPSSNESR	P_01735	SLC44A2
			AEHQQDSEDLFK	P_00043	SUN2
			SSLEELHGDANWGEDLR	P_01691	SUN2
			NISIHQAYQQCK	P_01409	PROM2
			VDTQSLDLLSSAAR	P_01896	PROM2
			VHLDIQVGEHANNYPEIAAK	P_01942	TMED4
			QLLDQVEQIQK	P_01506	TMED4
			SSLQPITTLGK	P_01692	PTK7
			YTCIAGNSCNIK	P_02186	PTK7
			YGENNSLSVEGFR	P_02132	SLC39A6
138	MGHHHHHHLEAARGYSFTTTAEKTVVALCGQRLETFIQEHLRTSSAEVTIQNVIKLSAVNSIFLSHNNTKSDGSLEDGDDVHRLTLTSDESTLIEDGGARNPILWNVADVVIKSIVEEIEDLVARSHLQLLNSKEGVLGLVHEFKVQGPGILPGLDSESASSSIRSNVTLTLRFLGVLYPLSSKVGELSGDNYLRNVSNLKPVPLIGPK	22731.9	TVVALCGQR	P_01855	CD151
			LETFIQEHLR	P_01135	CD151
			TSSAEVTIQNVIK	P_01832	CD97
			LSAVNSIFLSHNNTK	P_01283	CD97
			SDGSLEDGDDVHR	P_01558	SERINC1
			LTLTSDESTLIEDGGAR	P_01313	SERINC1
			NPILWNVADVVIK	P_01438	RPN2
			SIVEEIEDLVAR	P_01621	RPN2
			SHLQLLNSK	P_01606	VTCN1
			EGVLGLVHEFK	P_00444	VTCN1
			VQGPGILPGLDSESASSSIR	P_02015	TMEM206
			SNVTLTLR	P_01654	IL17RA
			FLGVLYPLSSK	P_00570	P2RY8
			VGELSGDNYLR	P_01931	IL17RA
			NVSNLKPVPLIGPK	P_01474	SCCPDH
139	MGHHHHHHLEAARGYSFTTTAEKALNPQDYVATVADALKYLALLETLTRTVTATFGYPFRVAALGSDLHIEVKSVLAETEGILQKLQALANEQAAAAHELEKHEQILVLDPPTDLKALADVATVLGRANNSWFQSILRIATGHNIIDELPPCKVHLNTFGFFKESQAYYQRAGLSVLLKISHVWQSAGISKDYYPINESLASLPLRNTNSSNNFSRDLEAEIHPLK	25002	ALNPQDYVATVADALK	P_00121	SLC12A9
			YLALLETLTR	P_02151	SLC12A9
			TVTATFGYPFR	P_01853	SYPL1
			VAALGSDLHIEVK	P_01863	BTN3A3
			SVLAETEGILQK	P_01706	KTN1
			LQALANEQAAAAHELEK	P_01262	KTN1
			HEQILVLDPPTDLK	P_00851	VAPA
			ALADVATVLGR	P_00100	NCSTN
			ANNSWFQSILR	P_00145	NCSTN
			IATGHNIIDELPPCK	P_00926	SYPL1
			VHLNTFGFFK	P_01944	GPR107
			ESQAYYQR	P_00492	PRNP
			AGLSVLLK	P_00073	PIGT
			ISHVWQSAGISK	P_01043	MERTK
			DYYPINESLASLPLR	P_00408	CLPTM1
			NTNSSNNFSR	P_01465	ITFG3
			DLEAEIHPLK	P_00333	ITFG3
140	MGHHHHHHLEAARGYSFTTTAEKGDFWLGNEHIHRAQVANLSSLLSELNKASASATVAVNPGPDTKADQLIQTLHAVDKTPESSPPGTPIGRGVTLFPDIKITQVLHFTKGENQSPVELHTKIGHENGEFQIFLDALDKDPTAEQFQEELEKGLPGLAGDHGEFGEKTNQVNSGGVLLRQTHQPPAPNSLIRDAPVPFAGEICAFK	22278.2	GDFWLGNEHIHR	P_00654	ANGPTL7
			AQVANLSSLLSELNK	P_00169	ANGPTL7
			ASASATVAVNPGPDTK	P_00172	CRYBB1
			ADQLIQTLHAVDK	P_00036	CDH6
			TPESSPPGTPIGR	P_01816	CDH6
			GVTLFPDIK	P_00830	CLSTN2
			ITQVLHFTK	P_01058	C4B
			GENQSPVELHTK	P_00669	CA3
			IGHENGEFQIFLDALDK	P_00964	CA3
			DPTAEQFQEELEK	P_00363	CASP14
			GLPGLAGDHGEFGEK	P_00742	C1QB
			TNQVNSGGVLLR	P_01812	C1QC
			QTHQPPAPNSLIR	P_01521	C1QC
			DAPVPFAGEICAFK	P_00266	CLSTN2
141	MGHHHHHHLEAARGYSFTTTAEKTHHDGAITEREVTVLLEHQKLLNQPNQWPLVKLLNDEDPVVVTKAQQEQELAADAFKGVFAIFGLYDKFSPYEWHTEEPEDGKEDPTVSALLTSEKGSAPPGPVPEGSIRLHVDPENFKTTDVTQTFGIEKSDACQGDSGGPLACEKTVAAPSVFIFPPSDEQLKGELDCHQLADSFREDARPVPQGSCQSELHR	24053.7	THHDGAITER	P_01772	CFD
			EVTVLLEHQK	P_00505	DSC3
			LLNQPNQWPLVK	P_01229	JUP
			LLNDEDPVVVTK	P_01228	JUP
			AQQEQELAADAFK	P_00167	PRKCSH
			GVFAIFGLYDK	P_00816	GRIA4
			FSPYEWHTEEPEDGK	P_00600	GRIA4
			EDPTVSALLTSEK	P_00428	GSTO1
			GSAPPGPVPEGSIR	P_00784	GSTO1
			LHVDPENFK	P_01188	HBG1
			TTDVTQTFGIEK	P_01835	HGFAC
			SDACQGDSGGPLACEK	P_01551	HGFAC
			TVAAPSVFIFPPSDEQLK	P_01843	IGKC
			GELDCHQLADSFR	P_00667	IGFBP4
			EDARPVPQGSCQSELHR	P_00425	IGFBP4
142	MGHHHHHHLEAARGYSFTTTAEKSLEQLQLARGFDVSSILDLQLSHNQLTKYLNLQENGIQVIRAFTVPITDVTENALKSLIAEVLVKFDAPPEAVAAKVLFETDLVNPRNIFWTDSNLDRNFYYAAVPSARWYLENVYPELRGTNYLADVFEKENFPNFLSACDKETFFNLSKLFDEINPETKFVGGAENTAHPR	22319.3	SLEQLQLAR	P_01630	KERA
			GFDVSSILDLQLSHNQLTK	P_00678	KERA
			YLNLQENGIQVIR	P_02161	LRRC4B
			AFTVPITDVTENALK	P_00059	LRRC4B
			SLIAEVLVK	P_01638	SCGB1D2
			FDAPPEAVAAK	P_00524	SCGB1D2
			VLFETDLVNPR	P_01972	NID1
			NIFWTDSNLDR	P_01402	NID1
			NFYYAAVPSAR	P_01388	GALNT2
			WYLENVYPELR	P_02102	GALNT2
			GTNYLADVFEK	P_00806	S100A7
			ENFPNFLSACDK	P_00473	S100A7
			ETFFNLSK	P_00496	SERPINA10
			LFDEINPETK	P_01138	SERPINA10
			FVGGAENTAHPR	P_00616	IGFBP5
143	MGHHHHHHLEAARGYSFTTTAEKFSSQELILRVPDESEVVVERVFGFSLITNKHRPQVAIICGSGLGGLTDKVHVVFSTERYNPESLLQEGEGRTLTLLPLLANNRHEDTNLASSTIIKVAQLDQLLHYRLGELFNPYYDPLQWKADLTGISPSPNLYLSKAVAEPGIQLKNSLWHTGDTSDQVRNPELNPCSVNAQCIEER	22590.5	FSSQELILR	P_00603	TGM3
			VPDESEVVVER	P_02007	TGM3
			VFGFSLITNK	P_01915	PNP
			HRPQVAIICGSGLGGLTDK	P_00886	PNP
			VHVVFSTER	P_01948	RARRES1
			YNPESLLQEGEGR	P_02168	RARRES1
			TLTLLPLLANNR	P_01808	SAG
			HEDTNLASSTIIK	P_00848	SAG
			VAQLDQLLHYR	P_01876	CHGB
			LGELFNPYYDPLQWK	P_01156	CHGB
			ADLTGISPSPNLYLSK	P_00035	SERPINB12
			AVAEPGIQLK	P_00196	THBS4
			NSLWHTGDTSDQVR	P_01456	THBS4
			NPELNPCSVNAQCIEER	P_01436	THBS4
144	MGHHHHHHLEAARGYSFTTTAEKLVIIEGDLERTIDDLEDELYAQKLQSSGIQPAAFRVTSLAPATSISPAKATILISHSRLQHEALNEAFSRFTGSSWIKYLELESSGHRSVQVLAYYTVRTSLENTFIHNTGKFVYLELPAAAKHDYILLPEDALTNTTRFQDSSQWLQIDLKLNSQGFGCAWLSKHSWPENLACEELPVYDR	23154.65	LVIIEGDLER	P_01331	TPM3
			TIDDLEDELYAQK	P_01779	TPM3
			LQSSGIQPAAFR	P_01277	OPTC
			VTSLAPATSISPAK	P_02046	OPTC
			ATILISHSR	P_00189	PAPPA2
			LQHEALNEAFSR	P_01270	PAPPA2
			FTGSSWIK	P_00608	NELL2
			YLELESSGHR	P_02153	NELL2
			SVQVLAYYTVR	P_01713	PTPRZ1
			TSLENTFIHNTGK	P_01830	PTPRZ1
			FVYLELPAAAK	P_00622	RELN
			HDYILLPEDALTNTTR	P_00846	RELN
			FQDSSQWLQIDLK	P_00587	RS1
			LNSQGFGCAWLSK	P_01254	RS1
			HSWPENLACEELPVYDR	P_00894	FRZB
145	MGHHHHHHLEAARGYSFTTTAEKDCQNYIKSVLQSINPAEPHKDCENYITLLERFEAEHISNYTALLLSRLHLDYIGPCKGHGEDHCQFVDSFLDGRLTFYGNWSEKVTLSAAPPSYFRHVGDLGNVTADKGDGPVQGIINFEQKATLAPSETPFVPQKLEAGDHPVELLARAEIENYVLTYKITFTPSSGIASEVTVPKDWFGALHEDANR	23675.63	DCQNYIK	P_00275	SEMA4B
			SVLQSINPAEPHK	P_01710	SEMA7A
			DCENYITLLER	P_00273	SEMA7A
			FEAEHISNYTALLLSR	P_00526	SEMA4B
			LHLDYIGPCK	P_01183	SPARC
			GHGEDHCQFVDSFLDGR	P_00705	ABI3BP
			LTFYGNWSEK	P_01306	SPON1
			VTLSAAPPSYFR	P_02039	SPON1
			HVGDLGNVTADK	P_00899	SOD1
			GDGPVQGIINFEQK	P_00655	SOD1
			ATLAPSETPFVPQK	P_00190	ABI3BP
			LEAGDHPVELLAR	P_01121	SPARC
			AEIENYVLTYK	P_00044	TNR
			ITFTPSSGIASEVTVPK	P_01053	TNR
			DWFGALHEDANR	P_00397	SPOCK1
146	MGHHHHHHLEAARGYSFTTTAEKDWFQLLHENSKSWEDNQQGDEALDTTKLTLLAPLNSVFKGDELADSALEIFKIETISHEDLQRSQDILLSVENTVIYRHGYENPTYRVIALINDQRVNDVNEFAPVFVERESDTSYVSLKTGIVSGFGRACIPTGPYPCGKCCHGDYSFRSDTSSNHAVLKGYSIFSYATKIEYAPGAGSLALFPGIR	23573.55	DWFQLLHENSK	P_00398	SPOCK2
			SWEDNQQGDEALDTTK	P_01715	SPOCK2
			LTLLAPLNSVFK	P_01312	TGFBI
			GDELADSALEIFK	P_00653	TGFBI
			IETISHEDLQR	P_00947	PROS1
			SQDILLSVENTVIYR	P_01666	PROS1
			HGYENPTYR	P_00864	APLP1
			VIALINDQR	P_01950	APLP1
			VNDVNEFAPVFVER	P_01992	CLSTN3
			ESDTSYVSLK	P_00489	CRP
			TGIVSGFGR	P_01767	F10
			ACIPTGPYPCGK	P_00025	F10
			CCHGDYSFR	P_00225	C1QTNF3
			SDTSSNHAVLK	P_01564	C1QTNF3
			GYSIFSYATK	P_00839	CRP
			IEYAPGAGSLALFPGIR	P_00949	CLSTN3
147	MGHHHHHHLEAARGYSFTTTAEKVQDQDLPNTPHSKVTATDLDEPDTLHTRIQVDYDGHCKLGAEVYHTLKGNPTVEVDLYTAKSAQFFNYKALLSYDGLNQRVDLPLPPEVWTAALRLGERPPALLGSQGLRNGQWTLIGRNPVVYGVFTTSSNIFKIEFTSDQARETGTPIWTSRGDHVWDGNSFDSKDGPNYQWVPYQGR	22816.3	VQDQDLPNTPHSK	P_02012	DSC1
			VTATDLDEPDTLHTR	P_02033	DSC1
			IQVDYDGHCK	P_01039	FSTL1
			LGAEVYHTLK	P_01150	ENO2
			GNPTVEVDLYTAK	P_00756	ENO2
			SAQFFNYK	P_01546	PLOD1
			ALLSYDGLNQR	P_00117	EPDR1
			VDLPLPPEVWTAALR	P_01893	NRXN2
			LGERPPALLGSQGLR	P_01158	NRXN2
			NGQWTLIGR	P_01393	PAM
			NPVVYGVFTTSSNIFK	P_01442	SEMA3A
			IEFTSDQAR	P_00945	SEZ6L
			ETGTPIWTSR	P_00497	SEZ6L
			GDHVWDGNSFDSK	P_00656	PAM
			DGPNYQWVPYQGR	P_00307	SEMA3A
148	MGHHHHHHLEAARGYSFTTTAEKALDAAYCFRFAGIDGTSTYTSGDQKLYSSAEFGRHLWLSFDEGRASVVQVGFPCLGKDIEHLTSLDFFRSYTSCCHDFDELCLKGEQFVFEKTHPHFVIPYRDSSDFGAPHPQVQSVRISLSGVHHFARIHGQNVPFDAVVVDKGNQGFNNNWLRWEDILSDEVNVARNIETNYTRITYEEIPLPIR	23935.57	ALDAAYCFR	P_00104	TGFB2
			FAGIDGTSTYTSGDQK	P_00517	TGFB2
			LYSSAEFGR	P_01359	SORCS1
			HLWLSFDEGR	P_00880	SORCS1
			ASVVQVGFPCLGK	P_00182	WIF1
[truncated: 214 more rows]

## Sheet: Table S4 
Table S4. Identification of HBFP Peptides using LC-MS/MS
QconCAT ID	%Cov	%Cov(50)	%Cov(95)	Accessions	Names	Confidence	Sequence	Modifications	Cleavages	dMass	Prec MW	Prec m/z	Theor MW	Theor m/z	Theor z	Sc	Time
1	1.12	0.823	0.823	IPI:IPI00943326.1; IPI:IPI00024284.5	Gene_Symbol=HSPG2 Basement membrane-specific heparan sulfate proteoglycan core protein variant; Gene_Symbol=HSPG2 Basement membrane-specific heparan sulfate proteoglycan core protein	99	LVSEDPINDGEWHR	Label:13C(6)15N(4)(R)@14		-0.077061	1675.71	838.86	1675.78	838.899	2	13	13.0596
1	1.12	0.823	0.823	IPI:IPI00943326.1; IPI:IPI00024284.5	Gene_Symbol=HSPG2 Basement membrane-specific heparan sulfate proteoglycan core protein variant; Gene_Symbol=HSPG2 Basement membrane-specific heparan sulfate proteoglycan core protein	99	NLVLHSARPGAPPPQPLDLQHR	Label:13C(6)15N(4)(R)@8; Label:13C(6)15N(4)(R)@22		-0.0403968	2432.29	609.08	2432.33	609.09	4	17	11.2638
1	1.12	0.823	0.823	IPI:IPI00943326.1; IPI:IPI00024284.5	Gene_Symbol=HSPG2 Basement membrane-specific heparan sulfate proteoglycan core protein variant; Gene_Symbol=HSPG2 Basement membrane-specific heparan sulfate proteoglycan core protein	99	LVSEDPINDGEWHR	Label:13C(6)15N(4)(R)@14		-0.0547221	1675.73	838.871	1675.78	838.899	2	12	13.0834
1	1.12	0.823	0.823	IPI:IPI00943326.1; IPI:IPI00024284.5	Gene_Symbol=HSPG2 Basement membrane-specific heparan sulfate proteoglycan core protein variant; Gene_Symbol=HSPG2 Basement membrane-specific heparan sulfate proteoglycan core protein	99	LVSEDPINDGEWHR	Deamidated(N)@8; Label:13C(6)15N(4)(R)@14		-1.02129	1675.75	559.589	1676.77	559.93	3	14	12.9387
1	1.12	0.823	0.823	IPI:IPI00943326.1; IPI:IPI00024284.5	Gene_Symbol=HSPG2 Basement membrane-specific heparan sulfate proteoglycan core protein variant; Gene_Symbol=HSPG2 Basement membrane-specific heparan sulfate proteoglycan core protein	98.97	LVSEDPINDGEWHR	Deamidated(N)@8; Label:13C(6)15N(4)(R)@14		-0.0405821	1676.73	559.916	1676.77	559.93	3	13	13.733
1	1.12	0.823	0.823	IPI:IPI00943326.1; IPI:IPI00024284.5	Gene_Symbol=HSPG2 Basement membrane-specific heparan sulfate proteoglycan core protein variant; Gene_Symbol=HSPG2 Basement membrane-specific heparan sulfate proteoglycan core protein	92.53	LVSEDPINDGEWHR	Label:13C(6)15N(4)(R)@14		0.0321176	1675.82	559.612	1675.78	559.602	3	13	12.5067
1	1.12	0.823	0.823	IPI:IPI00943326.1; IPI:IPI00024284.5	Gene_Symbol=HSPG2 Basement membrane-specific heparan sulfate proteoglycan core protein variant; Gene_Symbol=HSPG2 Basement membrane-specific heparan sulfate proteoglycan core protein	99	NLVLHSARPGAPPPQPLDLQHR	Label:13C(6)15N(4)(R)@8; Label:13C(6)15N(4)(R)@22		-0.00987918	2432.32	609.087	2432.33	609.09	4	15	12.2472
1	1.12	0.823	0.823	IPI:IPI00943326.1; IPI:IPI00024284.5	Gene_Symbol=HSPG2 Basement membrane-specific heparan sulfate proteoglycan core protein variant; Gene_Symbol=HSPG2 Basement membrane-specific heparan sulfate proteoglycan core protein	99	NLVLHSARPGAPPPQPLDLQHR	Label:13C(6)15N(4)(R)@8; Label:13C(6)15N(4)(R)@22		-0.0712672	2432.26	811.76	2432.33	811.784	3	15	11.2762
1	1.12	0.823	0.823	IPI:IPI00943326.1; IPI:IPI00024284.5	Gene_Symbol=HSPG2 Basement membrane-specific heparan sulfate proteoglycan core protein variant; Gene_Symbol=HSPG2 Basement membrane-specific heparan sulfate proteoglycan core protein	99	NLVLHSARPGAPPPQPLDLQHR	Label:13C(6)15N(4)(R)@8; Label:13C(6)15N(4)(R)@22		-0.0745631	2432.26	811.759	2432.33	811.784	3	15	11.3004
1	1.12	0.823	0.823	IPI:IPI00943326.1; IPI:IPI00024284.5	Gene_Symbol=HSPG2 Basement membrane-specific heparan sulfate proteoglycan core protein variant; Gene_Symbol=HSPG2 Basement membrane-specific heparan sulfate proteoglycan core protein	86.15	NLVLHSARPGAPPPQPLDLQHR	Label:13C(6)15N(4)(R)@8; Label:13C(6)15N(4)(R)@22		-0.0548011	2432.28	609.076	2432.33	609.09	4	13	11.2273
1	1.12	0.823	0.823	IPI:IPI00943326.1; IPI:IPI00024284.5	Gene_Symbol=HSPG2 Basement membrane-specific heparan sulfate proteoglycan core protein variant; Gene_Symbol=HSPG2 Basement membrane-specific heparan sulfate proteoglycan core protein	0	NLVLHSARPGAPPPQPLDLQHR	Deamidated(N)@1; Label:13C(6)15N(4)(R)@8; Label:13C(6)15N(4)(R)@22		-0.00634593	2433.31	609.334	2433.31	609.336	4	11	12.3389
1	7.241	7.241	7.241	IPI:IPI00939512.1; IPI:IPI00300786.1; IPI:IPI00025476.1; IPI:IPI00021447.1	Gene_Symbol=AMY1C;AMY1B;AMY2A;AMY1A Putative uncharacterized protein AMY2A; Gene_Symbol=AMY1C;AMY1B;AMY2A;AMY1A Alpha-amylase 1; Gene_Symbol=AMY1C;AMY1B;AMY2A;AMY1A Pancreatic alpha-amylase; Gene_Symbol=AMY2B Alpha-amylase 2B	99	AHFSISNSAEDPFIAIHAESK	Label:13C(6)15N(2)(K)@21		-0.0674813	2278.04	760.355	2278.11	760.378	3	17	17.8506
1	7.241	7.241	7.241	IPI:IPI00939512.1; IPI:IPI00300786.1; IPI:IPI00025476.1; IPI:IPI00021447.1	Gene_Symbol=AMY1C;AMY1B;AMY2A;AMY1A Putative uncharacterized protein AMY2A; Gene_Symbol=AMY1C;AMY1B;AMY2A;AMY1A Alpha-amylase 1; Gene_Symbol=AMY1C;AMY1B;AMY2A;AMY1A Pancreatic alpha-amylase; Gene_Symbol=AMY2B Alpha-amylase 2B	99	GHGAGGASILTFWDAR	Label:13C(6)15N(4)(R)@16		-0.0772706	1624.72	813.368	1624.8	813.407	2	16	22.1007
1	7.241	7.241	7.241	IPI:IPI00939512.1; IPI:IPI00300786.1; IPI:IPI00025476.1; IPI:IPI00021447.1	Gene_Symbol=AMY1C;AMY1B;AMY2A;AMY1A Putative uncharacterized protein AMY2A; Gene_Symbol=AMY1C;AMY1B;AMY2A;AMY1A Alpha-amylase 1; Gene_Symbol=AMY1C;AMY1B;AMY2A;AMY1A Pancreatic alpha-amylase; Gene_Symbol=AMY2B Alpha-amylase 2B	99	GHGAGGASILTFWDAR	Label:13C(6)15N(4)(R)@16		-0.0666505	1624.73	813.373	1624.8	813.407	2	13	22.1819
1	7.241	7.241	7.241	IPI:IPI00939512.1; IPI:IPI00300786.1; IPI:IPI00025476.1; IPI:IPI00021447.1	Gene_Symbol=AMY1C;AMY1B;AMY2A;AMY1A Putative uncharacterized protein AMY2A; Gene_Symbol=AMY1C;AMY1B;AMY2A;AMY1A Alpha-amylase 1; Gene_Symbol=AMY1C;AMY1B;AMY2A;AMY1A Pancreatic alpha-amylase; Gene_Symbol=AMY2B Alpha-amylase 2B	99	GHGAGGASILTFWDAR	Label:13C(6)15N(4)(R)@16		-2.06666	1622.73	541.918	1624.8	542.607	3	13	21.4259
1	7.241	7.241	7.241	IPI:IPI00939512.1; IPI:IPI00300786.1; IPI:IPI00025476.1; IPI:IPI00021447.1	Gene_Symbol=AMY1C;AMY1B;AMY2A;AMY1A Putative uncharacterized protein AMY2A; Gene_Symbol=AMY1C;AMY1B;AMY2A;AMY1A Alpha-amylase 1; Gene_Symbol=AMY1C;AMY1B;AMY2A;AMY1A Pancreatic alpha-amylase; Gene_Symbol=AMY2B Alpha-amylase 2B	0	GHGAGGASILTFWDAR			-0.169832	1614.62	808.317	1614.79	808.402	2	4	13.1718
1	1.472	1.472	1.472	IPI:IPI00937598.2; IPI:IPI00892604.1; IPI:IPI00892547.1; IPI:IPI00889723.2; IPI:IPI00887154.2; IPI:IPI00843913.3; IPI:IPI00654875.1; IPI:IPI00643525.1; IPI:IPI00418163.3; IPI:IPI00032258.4	Gene_Symbol=LOC100294156 similar to C4A protein isoform 2; Gene_Symbol=C4A;LOC100292046;C4B Complement component C4B (Childo blood group) 2; Gene_Symbol=LOC100294156 Complement component 4A; Gene_Symbol=C4A C4A protein; Gene_Symbol=LOC100293534 Complement component 4B; Gene_Symbol=C4B Complement component 4A; Gene_Symbol=C4B Complement C4-B; Gene_Symbol=C4A Putative uncharacterized protein C4A; G…	99	VGDTLNLNLR	Label:13C(6)15N(4)(R)@10		-0.040608	1123.58	562.798	1123.62	562.819	2	13	15.9267
1	1.472	1.472	1.472	IPI:IPI00937598.2; IPI:IPI00892604.1; IPI:IPI00892547.1; IPI:IPI00889723.2; IPI:IPI00887154.2; IPI:IPI00843913.3; IPI:IPI00654875.1; IPI:IPI00643525.1; IPI:IPI00418163.3; IPI:IPI00032258.4	Gene_Symbol=LOC100294156 similar to C4A protein isoform 2; Gene_Symbol=C4A;LOC100292046;C4B Complement component C4B (Childo blood group) 2; Gene_Symbol=LOC100294156 Complement component 4A; Gene_Symbol=C4A C4A protein; Gene_Symbol=LOC100293534 Complement component 4B; Gene_Symbol=C4B Complement component 4A; Gene_Symbol=C4B Complement C4-B; Gene_Symbol=C4A Putative uncharacterized protein C4A; G…	99	VLSLAQEQVGGSPEK	Label:13C(6)15N(2)(K)@15		-0.0809923	1548.74	775.379	1548.82	775.419	2	15	12.039
1	5.016	5.016	5.016	IPI:IPI00902653.1; IPI:IPI00902579.2; IPI:IPI00744076.1; IPI:IPI00640271.1; IPI:IPI00013945.1	Gene_Symbol=UMOD cDNA FLJ31160 fis, clone KIDNE1000015, highly similar to UROMODULIN; Gene_Symbol=UMOD Isoform 2 of Uromodulin; Gene_Symbol=UMOD Isoform 3 of Uromodulin; Gene_Symbol=UMOD cDNA FLJ34642 fis, clone KIDNE2016918, highly similar to UROMODULIN; Gene_Symbol=UMOD Isoform 1 of Uromodulin	99	DSTIQVVENGESSQGR			0.470588	1705.26	853.638	1704.79	853.403	2	13	10.8918
1	5.016	5.016	5.016	IPI:IPI00902653.1; IPI:IPI00902579.2; IPI:IPI00744076.1; IPI:IPI00640271.1; IPI:IPI00013945.1	Gene_Symbol=UMOD cDNA FLJ31160 fis, clone KIDNE1000015, highly similar to UROMODULIN; Gene_Symbol=UMOD Isoform 2 of Uromodulin; Gene_Symbol=UMOD Isoform 3 of Uromodulin; Gene_Symbol=UMOD cDNA FLJ34642 fis, clone KIDNE2016918, highly similar to UROMODULIN; Gene_Symbol=UMOD Isoform 1 of Uromodulin	99	STEYGEGYACDTDLR	Propionamide(C)@10		0.235707	1749.95	875.983	1749.72	875.865	2	13	11.7176
1	5.016	5.016	5.016	IPI:IPI00902653.1; IPI:IPI00902579.2; IPI:IPI00744076.1; IPI:IPI00640271.1; IPI:IPI00013945.1	Gene_Symbol=UMOD cDNA FLJ31160 fis, clone KIDNE1000015, highly similar to UROMODULIN; Gene_Symbol=UMOD Isoform 2 of Uromodulin; Gene_Symbol=UMOD Isoform 3 of Uromodulin; Gene_Symbol=UMOD cDNA FLJ34642 fis, clone KIDNE2016918, highly similar to UROMODULIN; Gene_Symbol=UMOD Isoform 1 of Uromodulin	99	DSTIQVVENGESSQGR	Label:13C(6)15N(4)(R)@16		0.889565	1715.69	858.852	1714.8	858.407	2	15	10.5849
1	5.016	5.016	5.016	IPI:IPI00902653.1; IPI:IPI00902579.2; IPI:IPI00744076.1; IPI:IPI00640271.1; IPI:IPI00013945.1	Gene_Symbol=UMOD cDNA FLJ31160 fis, clone KIDNE1000015, highly similar to UROMODULIN; Gene_Symbol=UMOD Isoform 2 of Uromodulin; Gene_Symbol=UMOD Isoform 3 of Uromodulin; Gene_Symbol=UMOD cDNA FLJ34642 fis, clone KIDNE2016918, highly similar to UROMODULIN; Gene_Symbol=UMOD Isoform 1 of Uromodulin	99	DSTIQVVENGESSQGR	Deamidated(N)@9; Label:13C(6)15N(4)(R)@16		-0.0542893	1715.73	858.872	1715.78	858.899	2	15	11.816
1	5.016	5.016	5.016	IPI:IPI00902653.1; IPI:IPI00902579.2; IPI:IPI00744076.1; IPI:IPI00640271.1; IPI:IPI00013945.1	Gene_Symbol=UMOD cDNA FLJ31160 fis, clone KIDNE1000015, highly similar to UROMODULIN; Gene_Symbol=UMOD Isoform 2 of Uromodulin; Gene_Symbol=UMOD Isoform 3 of Uromodulin; Gene_Symbol=UMOD cDNA FLJ34642 fis, clone KIDNE2016918, highly similar to UROMODULIN; Gene_Symbol=UMOD Isoform 1 of Uromodulin	99	DSTIQVVENGESSQGR	Label:13C(6)15N(4)(R)@16		0.896279	1715.7	858.855	1714.8	858.407	2	14	9.5415
1	5.016	5.016	5.016	IPI:IPI00902653.1; IPI:IPI00902579.2; IPI:IPI00744076.1; IPI:IPI00640271.1; IPI:IPI00013945.1	Gene_Symbol=UMOD cDNA FLJ31160 fis, clone KIDNE1000015, highly similar to UROMODULIN; Gene_Symbol=UMOD Isoform 2 of Uromodulin; Gene_Symbol=UMOD Isoform 3 of Uromodulin; Gene_Symbol=UMOD cDNA FLJ34642 fis, clone KIDNE2016918, highly similar to UROMODULIN; Gene_Symbol=UMOD Isoform 1 of Uromodulin	99	DSTIQVVENGESSQGR	Deamidated(N)@9; Label:13C(6)15N(4)(R)@16		-0.0874924	1715.7	858.855	1715.78	858.899	2	13	9.5722
1	5.016	5.016	5.016	IPI:IPI00902653.1; IPI:IPI00902579.2; IPI:IPI00744076.1; IPI:IPI00640271.1; IPI:IPI00013945.1	Gene_Symbol=UMOD cDNA FLJ31160 fis, clone KIDNE1000015, highly similar to UROMODULIN; Gene_Symbol=UMOD Isoform 2 of Uromodulin; Gene_Symbol=UMOD Isoform 3 of Uromodulin; Gene_Symbol=UMOD cDNA FLJ34642 fis, clone KIDNE2016918, highly similar to UROMODULIN; Gene_Symbol=UMOD Isoform 1 of Uromodulin	99	DSTIQVVENGESSQGR	Deamidated(N)@9; Label:13C(6)15N(4)(R)@16		-0.074675	1715.71	858.862	1715.78	858.899	2	13	10.5606
1	5.016	5.016	5.016	IPI:IPI00902653.1; IPI:IPI00902579.2; IPI:IPI00744076.1; IPI:IPI00640271.1; IPI:IPI00013945.1	Gene_Symbol=UMOD cDNA FLJ31160 fis, clone KIDNE1000015, highly similar to UROMODULIN; Gene_Symbol=UMOD Isoform 2 of Uromodulin; Gene_Symbol=UMOD Isoform 3 of Uromodulin; Gene_Symbol=UMOD cDNA FLJ34642 fis, clone KIDNE2016918, highly similar to UROMODULIN; Gene_Symbol=UMOD Isoform 1 of Uromodulin	99	DSTIQVVENGESSQGR			0.258796	1705.05	853.532	1704.79	853.403	2	11	10.9355
1	5.016	5.016	5.016	IPI:IPI00902653.1; IPI:IPI00902579.2; IPI:IPI00744076.1; IPI:IPI00640271.1; IPI:IPI00013945.1	Gene_Symbol=UMOD cDNA FLJ31160 fis, clone KIDNE1000015, highly similar to UROMODULIN; Gene_Symbol=UMOD Isoform 2 of Uromodulin; Gene_Symbol=UMOD Isoform 3 of Uromodulin; Gene_Symbol=UMOD cDNA FLJ34642 fis, clone KIDNE2016918, highly similar to UROMODULIN; Gene_Symbol=UMOD Isoform 1 of Uromodulin	98.97	DSTIQVVENGESSQGR	Deamidated(N)@9; Label:13C(6)15N(4)(R)@16		-0.120892	1715.66	572.895	1715.78	572.935	3	13	9.608
1	5.016	5.016	5.016	IPI:IPI00902653.1; IPI:IPI00902579.2; IPI:IPI00744076.1; IPI:IPI00640271.1; IPI:IPI00013945.1	Gene_Symbol=UMOD cDNA FLJ31160 fis, clone KIDNE1000015, highly similar to UROMODULIN; Gene_Symbol=UMOD Isoform 2 of Uromodulin; Gene_Symbol=UMOD Isoform 3 of Uromodulin; Gene_Symbol=UMOD cDNA FLJ34642 fis, clone KIDNE2016918, highly similar to UROMODULIN; Gene_Symbol=UMOD Isoform 1 of Uromodulin	98.97	DSTIQVVENGESSQGR	Deamidated(N)@9		0.327759	1706.1	854.059	1705.78	853.895	2	10	9.6445
1	5.016	5.016	5.016	IPI:IPI00902653.1; IPI:IPI00902579.2; IPI:IPI00744076.1; IPI:IPI00640271.1; IPI:IPI00013945.1	Gene_Symbol=UMOD cDNA FLJ31160 fis, clone KIDNE1000015, highly similar to UROMODULIN; Gene_Symbol=UMOD Isoform 2 of Uromodulin; Gene_Symbol=UMOD Isoform 3 of Uromodulin; Gene_Symbol=UMOD cDNA FLJ34642 fis, clone KIDNE2016918, highly similar to UROMODULIN; Gene_Symbol=UMOD Isoform 1 of Uromodulin	96.09	DSTIQVVENGESSQGR	Deamidated(N)@9; Label:13C(6)15N(4)(R)@16		-0.097258	1715.69	858.851	1715.78	858.899	2	10	11.7779
1	5.016	5.016	5.016	IPI:IPI00902653.1; IPI:IPI00902579.2; IPI:IPI00744076.1; IPI:IPI00640271.1; IPI:IPI00013945.1	Gene_Symbol=UMOD cDNA FLJ31160 fis, clone KIDNE1000015, highly similar to UROMODULIN; Gene_Symbol=UMOD Isoform 2 of Uromodulin; Gene_Symbol=UMOD Isoform 3 of Uromodulin; Gene_Symbol=UMOD cDNA FLJ34642 fis, clone KIDNE2016918, highly similar to UROMODULIN; Gene_Symbol=UMOD Isoform 1 of Uromodulin	92.53	DSTIQVVENGESSQGR	Deamidated(N)@9; Label:13C(6)15N(4)(R)@16		-0.00022542	1715.78	572.935	1715.78	572.935	3	12	11.0027
1	5.016	5.016	5.016	IPI:IPI00902653.1; IPI:IPI00902579.2; IPI:IPI00744076.1; IPI:IPI00640271.1; IPI:IPI00013945.1	Gene_Symbol=UMOD cDNA FLJ31160 fis, clone KIDNE1000015, highly similar to UROMODULIN; Gene_Symbol=UMOD Isoform 2 of Uromodulin; Gene_Symbol=UMOD Isoform 3 of Uromodulin; Gene_Symbol=UMOD cDNA FLJ34642 fis, clone KIDNE2016918, highly similar to UROMODULIN; Gene_Symbol=UMOD Isoform 1 of Uromodulin	92.53	DSTIQVVENGESSQGR	Deamidated(N)@9; Label:13C(6)15N(4)(R)@16		-0.0747493	1715.71	572.91	1715.78	572.935	3	12	11.2699
1	5.016	5.016	5.016	IPI:IPI00902653.1; IPI:IPI00902579.2; IPI:IPI00744076.1; IPI:IPI00640271.1; IPI:IPI00013945.1	Gene_Symbol=UMOD cDNA FLJ31160 fis, clone KIDNE1000015, highly similar to UROMODULIN; Gene_Symbol=UMOD Isoform 2 of Uromodulin; Gene_Symbol=UMOD Isoform 3 of Uromodulin; Gene_Symbol=UMOD cDNA FLJ34642 fis, clone KIDNE2016918, highly similar to UROMODULIN; Gene_Symbol=UMOD Isoform 1 of Uromodulin	0	DSTIQVVENGESSQGR	Deamidated(N)@9; Label:13C(6)15N(4)(R)@16		-0.0395931	1715.74	572.922	1715.78	572.935	3	10	9.5842
1	5.016	5.016	5.016	IPI:IPI00902653.1; IPI:IPI00902579.2; IPI:IPI00744076.1; IPI:IPI00640271.1; IPI:IPI00013945.1	Gene_Symbol=UMOD cDNA FLJ31160 fis, clone KIDNE1000015, highly similar to UROMODULIN; Gene_Symbol=UMOD Isoform 2 of Uromodulin; Gene_Symbol=UMOD Isoform 3 of Uromodulin; Gene_Symbol=UMOD cDNA FLJ34642 fis, clone KIDNE2016918, highly similar to UROMODULIN; Gene_Symbol=UMOD Isoform 1 of Uromodulin	99	STEYGEGYACDTDLR	Propionamide(C)@10; Label:13C(6)15N(4)(R)@15		-0.083963	1759.64	880.827	1759.72	880.869	2	13	11.1974
1	5.016	5.016	5.016	IPI:IPI00902653.1; IPI:IPI00902579.2; IPI:IPI00744076.1; IPI:IPI00640271.1; IPI:IPI00013945.1	Gene_Symbol=UMOD cDNA FLJ31160 fis, clone KIDNE1000015, highly similar to UROMODULIN; Gene_Symbol=UMOD Isoform 2 of Uromodulin; Gene_Symbol=UMOD Isoform 3 of Uromodulin; Gene_Symbol=UMOD cDNA FLJ34642 fis, clone KIDNE2016918, highly similar to UROMODULIN; Gene_Symbol=UMOD Isoform 1 of Uromodulin	99	STEYGEGYACDTDLR	Propionamide(C)@10; Label:13C(6)15N(4)(R)@15		-0.0594269	1759.66	880.839	1759.72	880.869	2	12	11.167
1	5.016	5.016	5.016	IPI:IPI00902653.1; IPI:IPI00902579.2; IPI:IPI00744076.1; IPI:IPI00640271.1; IPI:IPI00013945.1	Gene_Symbol=UMOD cDNA FLJ31160 fis, clone KIDNE1000015, highly similar to UROMODULIN; Gene_Symbol=UMOD Isoform 2 of Uromodulin; Gene_Symbol=UMOD Isoform 3 of Uromodulin; Gene_Symbol=UMOD cDNA FLJ34642 fis, clone KIDNE2016918, highly similar to UROMODULIN; Gene_Symbol=UMOD Isoform 1 of Uromodulin	99	STEYGEGYACDTDLR	Propionamide(C)@10; Label:13C(6)15N(4)(R)@15		0.877585	1760.6	881.308	1759.72	880.869	2	11	12.7881
1	5.016	5.016	5.016	IPI:IPI00902653.1; IPI:IPI00902579.2; IPI:IPI00744076.1; IPI:IPI00640271.1; IPI:IPI00013945.1	Gene_Symbol=UMOD cDNA FLJ31160 fis, clone KIDNE1000015, highly similar to UROMODULIN; Gene_Symbol=UMOD Isoform 2 of Uromodulin; Gene_Symbol=UMOD Isoform 3 of Uromodulin; Gene_Symbol=UMOD cDNA FLJ34642 fis, clone KIDNE2016918, highly similar to UROMODULIN; Gene_Symbol=UMOD Isoform 1 of Uromodulin	98.97	STEYGEGYACDTDLR	Propionamide(C)@10		0.557607	1750.27	876.144	1749.72	875.865	2	10	11.7476
1	5.016	5.016	5.016	IPI:IPI00902653.1; IPI:IPI00902579.2; IPI:IPI00744076.1; IPI:IPI00640271.1; IPI:IPI00013945.1	Gene_Symbol=UMOD cDNA FLJ31160 fis, clone KIDNE1000015, highly similar to UROMODULIN; Gene_Symbol=UMOD Isoform 2 of Uromodulin; Gene_Symbol=UMOD Isoform 3 of Uromodulin; Gene_Symbol=UMOD cDNA FLJ34642 fis, clone KIDNE2016918, highly similar to UROMODULIN; Gene_Symbol=UMOD Isoform 1 of Uromodulin	86.15	STEYGEGYACDTDLR	Propionamide(C)@10; Label:13C(6)15N(4)(R)@15		0.901022	1760.62	881.319	1759.72	880.869	2	10	12.7539
1	2.792	2.792	2.792	IPI:IPI00221224.6	Gene_Symbol=ANPEP Aminopeptidase N	99	AQIINDAFNLASAHK	Label:13C(6)15N(2)(K)@15		-0.080256	1619.77	810.893	1619.85	810.933	2	14	18.0813
1	2.792	2.792	2.792	IPI:IPI00221224.6	Gene_Symbol=ANPEP Aminopeptidase N	99	DNEETGFGSGTR	Label:13C(6)15N(4)(R)@12		-0.060731	1278.47	640.245	1278.54	640.275	2	12	7.8013
1	2.792	2.792	2.792	IPI:IPI00221224.6	Gene_Symbol=ANPEP Aminopeptidase N	99	AQIINDAFNLASAHK	Label:13C(6)15N(2)(K)@15		-0.06988	1619.78	810.898	1619.85	810.933	2	15	18.0575
1	2.792	2.792	2.792	IPI:IPI00221224.6	Gene_Symbol=ANPEP Aminopeptidase N	99	AQIINDAFNLASAHK	Deamidated(N)@5; Label:13C(6)15N(2)(K)@15		-0.00532491	1620.83	541.284	1620.84	541.286	3	17	19.2296
1	2.792	2.792	2.792	IPI:IPI00221224.6	Gene_Symbol=ANPEP Aminopeptidase N	99	AQIINDAFNLASAHK	Deamidated(N)@5; Label:13C(6)15N(2)(K)@15		-0.0915676	1620.74	541.255	1620.84	541.286	3	15	16.5012
1	2.792	2.792	2.792	IPI:IPI00221224.6	Gene_Symbol=ANPEP Aminopeptidase N	99	AQIINDAFNLASAHK	Deamidated(N)@5; Label:13C(6)15N(2)(K)@15		-0.00440939	1620.83	541.284	1620.84	541.286	3	16	19.2535
1	2.792	2.792	2.792	IPI:IPI00221224.6	Gene_Symbol=ANPEP Aminopeptidase N	99	DNEETGFGSGTR	Label:13C(6)15N(4)(R)@12		-0.0629283	1278.47	640.243	1278.54	640.275	2	11	7.8317
1	2.792	2.792	2.792	IPI:IPI00221224.6	Gene_Symbol=ANPEP Aminopeptidase N	99	DNEETGFGSGTR			0.322904	1268.85	635.432	1268.53	635.271	2	10	7.8751
1	0.7728	0.7728	0.7728	IPI:IPI00160130.4	Gene_Symbol=CUBN Cubilin	99	DGVDSDAPILSK	Label:13C(6)15N(2)(K)@12		-0.0628398	1223.55	612.782	1223.61	612.814	2	17	12.1334
1	0.7728	0.7728	0.7728	IPI:IPI00160130.4	Gene_Symbol=CUBN Cubilin	99	SAVTGSCVNDGVHIIR	Propionamide(C)@7; Deamidated(N)@9; Label:13C(6)15N(4)(R)@16		-0.998646	1707.85	570.289	1708.84	570.622	3	18	11.1244
1	0.7728	0.7728	0.7728	IPI:IPI00160130.4	Gene_Symbol=CUBN Cubilin	99	DGVDSDAPILSK	Label:13C(6)15N(2)(K)@12		-0.0564922	1223.56	612.785	1223.61	612.814	2	17	12.1574
1	6.303	6.303	6.303	IPI:IPI00930442.1; IPI:IPI00930072.1; IPI:IPI00399007.7	Gene_Symbol=IGHG4 Putative uncharacterized protein DKFZp686M24218; Gene_Symbol=IGHG2 Putative uncharacterized protein DKFZp686E23209; Gene_Symbol=IGHG2 Putative uncharacterized protein DKFZp686I04196 (Fragment)	99	STSESTAALGCLVK	Propionamide(C)@11; Label:13C(6)15N(2)(K)@14		-0.0750934	1444.66	723.336	1444.73	723.373	2	14	14.8114
1	6.303	6.303	6.303	IPI:IPI00930442.1; IPI:IPI00930072.1; IPI:IPI00399007.7	Gene_Symbol=IGHG4 Putative uncharacterized protein DKFZp686M24218; Gene_Symbol=IGHG2 Putative uncharacterized protein DKFZp686E23209; Gene_Symbol=IGHG2 Putative uncharacterized protein DKFZp686I04196 (Fragment)	99	VVSVLTVVHQDWLNGK	Deamidated(N)@14; Label:13C(6)15N(2)(K)@16		-1.04176	1800.94	601.321	1801.98	601.668	3	14	22.0768
1	6.303	6.303	6.303	IPI:IPI00930442.1; IPI:IPI00930072.1; IPI:IPI00399007.7	Gene_Symbol=IGHG4 Putative uncharacterized protein DKFZp686M24218; Gene_Symbol=IGHG2 Putative uncharacterized protein DKFZp686E23209; Gene_Symbol=IGHG2 Putative uncharacterized protein DKFZp686I04196 (Fragment)	99	STSESTAALGCLVK	Propionamide(C)@11; Label:13C(6)15N(2)(K)@14		-0.091695	1444.64	723.328	1444.73	723.373	2	14	14.7874
1	6.303	6.303	6.303	IPI:IPI00930442.1; IPI:IPI00930072.1; IPI:IPI00399007.7	Gene_Symbol=IGHG4 Putative uncharacterized protein DKFZp686M24218; Gene_Symbol=IGHG2 Putative uncharacterized protein DKFZp686E23209; Gene_Symbol=IGHG2 Putative uncharacterized protein DKFZp686I04196 (Fragment)	99	STSESTAALGCLVK	Propionamide(C)@11		0.403095	1437.12	719.568	1436.72	719.366	2	13	14.9162
1	6.303	6.303	6.303	IPI:IPI00930442.1; IPI:IPI00930072.1; IPI:IPI00399007.7	Gene_Symbol=IGHG4 Putative uncharacterized protein DKFZp686M24218; Gene_Symbol=IGHG2 Putative uncharacterized protein DKFZp686E23209; Gene_Symbol=IGHG2 Putative uncharacterized protein DKFZp686I04196 (Fragment)	99	STSESTAALGCLVK	Propionamide(C)@11; Label:13C(6)15N(2)(K)@14		-0.0809966	1444.65	482.558	1444.73	482.585	3	14	14.8488
1	6.303	6.303	6.303	IPI:IPI00930442.1; IPI:IPI00930072.1; IPI:IPI00399007.7	Gene_Symbol=IGHG4 Putative uncharacterized protein DKFZp686M24218; Gene_Symbol=IGHG2 Putative uncharacterized protein DKFZp686E23209; Gene_Symbol=IGHG2 Putative uncharacterized protein DKFZp686I04196 (Fragment)	99	STSESTAALGCLVK	Propionamide(C)@11; Label:13C(6)15N(2)(K)@14		-0.0666229	1444.67	482.562	1444.73	482.585	3	14	14.8798
1	2.724	2.724	1.459	IPI:IPI00291136.4	Gene_Symbol=COL6A1 Collagen alpha-1(VI) chain	99	TAEYDVAYGESHLFR	Label:13C(6)15N(4)(R)@15		-0.0386431	1766.78	589.932	1766.81	589.945	3	17	17.2677
1	2.724	2.724	1.459	IPI:IPI00291136.4	Gene_Symbol=COL6A1 Collagen alpha-1(VI) chain	94.59	GLEQLLVGGSHLK	Label:13C(6)15N(2)(K)@13		-0.00151953	1357.78	453.6	1357.78	453.601	3	12	19.5962
1	2.724	2.724	1.459	IPI:IPI00291136.4	Gene_Symbol=COL6A1 Collagen alpha-1(VI) chain	0	GLEQLLVGGSHLK	Label:13C(6)15N(2)(K)@13		0.00772729	1357.79	453.603	1357.78	453.601	3	8	19.5662
1	2.724	2.724	1.459	IPI:IPI00291136.4	Gene_Symbol=COL6A1 Collagen alpha-1(VI) chain	98.97	TAEYDVAYGESHLFR	Label:13C(6)15N(4)(R)@15		-0.040291	1766.77	589.932	1766.81	589.945	3	13	17.2439
1	6.964	6.964	6.964	IPI:IPI00790784.2; IPI:IPI00553177.1	Gene_Symbol=SERPINA1 Isoform 2 of Alpha-1-antitrypsin; Gene_Symbol=SERPINA1 Isoform 1 of Alpha-1-antitrypsin	99	SVLGQLGITK	Label:13C(6)15N(2)(K)@10		-0.0173229	1022.6	512.309	1022.62	512.318	2	14	17.8816
1	6.964	6.964	6.964	IPI:IPI00790784.2; IPI:IPI00553177.1	Gene_Symbol=SERPINA1 Isoform 2 of Alpha-1-antitrypsin; Gene_Symbol=SERPINA1 Isoform 1 of Alpha-1-antitrypsin	97.19	TDTSHHDQDHPTFNK	Deamidated(N)@14; Label:13C(6)15N(2)(K)@15		-1.01575	1786.74	596.588	1787.76	596.927	3	14	6.6284
1	6.964	6.964	6.964	IPI:IPI00790784.2; IPI:IPI00553177.1	Gene_Symbol=SERPINA1 Isoform 2 of Alpha-1-antitrypsin; Gene_Symbol=SERPINA1 Isoform 1 of Alpha-1-antitrypsin	99	SVLGQLGITK	Label:13C(6)15N(2)(K)@10		-0.03307	1022.59	512.302	1022.62	512.318	2	12	17.8431
1	6.964	6.964	6.964	IPI:IPI00790784.2; IPI:IPI00553177.1	Gene_Symbol=SERPINA1 Isoform 2 of Alpha-1-antitrypsin; Gene_Symbol=SERPINA1 Isoform 1 of Alpha-1-antitrypsin	0	SVLGQLGITK	Label:13C(6)15N(2)(K)@10		0.944957	1023.57	512.79	1022.62	512.318	2	9	19.5257
1	6.964	6.964	6.964	IPI:IPI00790784.2; IPI:IPI00553177.1	Gene_Symbol=SERPINA1 Isoform 2 of Alpha-1-antitrypsin; Gene_Symbol=SERPINA1 Isoform 1 of Alpha-1-antitrypsin	96.09	TDTSHHDQDHPTFNK	Label:13C(6)15N(2)(K)@15		-0.0407028	1786.73	596.585	1786.78	596.599	3	13	6.5985
1	6.964	6.964	6.964	IPI:IPI00790784.2; IPI:IPI00553177.1	Gene_Symbol=SERPINA1 Isoform 2 of Alpha-1-antitrypsin; Gene_Symbol=SERPINA1 Isoform 1 of Alpha-1-antitrypsin	96.09	TDTSHHDQDHPTFNK	Label:13C(6)15N(2)(K)@15		-0.0539952	1786.72	894.368	1786.78	894.395	2	9	6.6344
1	6.964	6.964	6.964	IPI:IPI00790784.2; IPI:IPI00553177.1	Gene_Symbol=SERPINA1 Isoform 2 of Alpha-1-antitrypsin; Gene_Symbol=SERPINA1 Isoform 1 of Alpha-1-antitrypsin	86.15	TDTSHHDQDHPTFNK	Label:13C(6)15N(2)(K)@15		-0.0959874	1786.68	894.347	1786.78	894.395	2	9	6.6642
1	6.964	6.964	6.964	IPI:IPI00790784.2; IPI:IPI00553177.1	Gene_Symbol=SERPINA1 Isoform 2 of Alpha-1-antitrypsin; Gene_Symbol=SERPINA1 Isoform 1 of Alpha-1-antitrypsin	0	TDTSHHDQDHPTFNK	Label:13C(6)15N(2)(K)@15		0.110285	1786.89	447.729	1786.78	447.701	4	8	6.5687
1	3.404	1.844	1.844	IPI:IPI00796316.4; IPI:IPI00647556.2; IPI:IPI00646773.2; IPI:IPI00513782.3; IPI:IPI00026314.1	Gene_Symbol=GSN cDNA FLJ53327, highly similar to Gelsolin; Gene_Symbol=GSN gelsolin isoform c; Gene_Symbol=GSN Isoform 2 of Gelsolin; Gene_Symbol=GSN cDNA FLJ35478 fis, clone SMINT2007796, highly similar to Gelsolin; Gene_Symbol=GSN Isoform 1 of Gelsolin	99	AGALNSNDAFVLK	Label:13C(6)15N(2)(K)@13		-0.0567106	1326.65	664.33	1326.7	664.358	2	14	16.1404
1	3.404	1.844	1.844	IPI:IPI00796316.4; IPI:IPI00647556.2; IPI:IPI00646773.2; IPI:IPI00513782.3; IPI:IPI00026314.1	Gene_Symbol=GSN cDNA FLJ53327, highly similar to Gelsolin; Gene_Symbol=GSN gelsolin isoform c; Gene_Symbol=GSN Isoform 2 of Gelsolin; Gene_Symbol=GSN cDNA FLJ35478 fis, clone SMINT2007796, highly similar to Gelsolin; Gene_Symbol=GSN Isoform 1 of Gelsolin	99	AGALNSNDAFVLK	Label:13C(6)15N(2)(K)@13		-0.0595182	1326.64	664.329	1326.7	664.358	2	14	16.1686
1	4.695	4.695	4.695	IPI:IPI00967977.1; IPI:IPI00029260.2	Gene_Symbol=CD14 23 kDa protein; Gene_Symbol=CD14 Monocyte differentiation antigen CD14	99	LKELTLEDLK	Label:13C(6)15N(2)(K)@2; Label:13C(6)15N(2)(K)@10		0.0196367	1216.74	406.589	1216.72	406.582	3	13	15.8786
1	4.695	4.695	4.695	IPI:IPI00967977.1; IPI:IPI00029260.2	Gene_Symbol=CD14 23 kDa protein; Gene_Symbol=CD14 Monocyte differentiation antigen CD14	0	ELTLEDLK	Label:13C(6)15N(2)(K)@8		-0.0532983	967.478	484.747	967.532	484.773	2	6	17.1223
1	4.695	4.695	4.695	IPI:IPI00967977.1; IPI:IPI00029260.2	Gene_Symbol=CD14 23 kDa protein; Gene_Symbol=CD14 Monocyte differentiation antigen CD14	0	ELTLEDLK	Label:13C(6)15N(2)(K)@8		-0.0396875	967.492	484.753	967.532	484.773	2	8	17.1462
1	2.008	2.008	2.008	IPI:IPI00947307.1; IPI:IPI00946976.1; IPI:IPI00017601.1	Gene_Symbol=CP cDNA FLJ58075, highly similar to Ceruloplasmin; Gene_Symbol=CP Putative uncharacterized protein CP; Gene_Symbol=CP Ceruloplasmin	98.56	LISVDTEHSNIYLQNGPDR	Deamidated(N)@10; Label:13C(6)15N(4)(R)@19		-1.02696	2180.03	727.684	2181.06	728.027	3	14	14.5105
2	13.62	13.62	13.62	IPI:IPI00967977.1; IPI:IPI00029260.2	Gene_Symbol=CD14 23 kDa protein; Gene_Symbol=CD14 Monocyte differentiation antigen CD14	99	AFPALTSLDLSDNPGLGER	Label:13C(6)15N(4)(R)@19		-0.122245	1981.88	991.945	1982	992.006	2	14	22.1221
2	13.62	13.62	13.62	IPI:IPI00967977.1; IPI:IPI00029260.2	Gene_Symbol=CD14 23 kDa protein; Gene_Symbol=CD14 Monocyte differentiation antigen CD14	99	LKELTLEDLK	Label:13C(6)15N(2)(K)@2; Label:13C(6)15N(2)(K)@10		-0.072513	1216.65	609.333	1216.72	609.37	2	14	15.8328
2	13.62	13.62	13.62	IPI:IPI00967977.1; IPI:IPI00029260.2	Gene_Symbol=CD14 23 kDa protein; Gene_Symbol=CD14 Monocyte differentiation antigen CD14	86.02	ELTLEDLK	Label:13C(6)15N(2)(K)@8		-0.0108789	967.521	484.768	967.532	484.773	2	10	17.0519
2	13.62	13.62	13.62	IPI:IPI00967977.1; IPI:IPI00029260.2	Gene_Symbol=CD14 23 kDa protein; Gene_Symbol=CD14 Monocyte differentiation antigen CD14	99	AFPALTSLDLSDNPGLGER	Label:13C(6)15N(4)(R)@19		-0.0637733	1981.93	991.975	1982	992.006	2	14	22.0857
2	13.62	13.62	13.62	IPI:IPI00967977.1; IPI:IPI00029260.2	Gene_Symbol=CD14 23 kDa protein; Gene_Symbol=CD14 Monocyte differentiation antigen CD14	0	AFPALTSLDLSDNPGLGER	Label:13C(6)15N(4)(R)@19		-0.100591	1981.9	661.64	1982	661.673	3	11	22.0797
2	13.62	13.62	13.62	IPI:IPI00967977.1; IPI:IPI00029260.2	Gene_Symbol=CD14 23 kDa protein; Gene_Symbol=CD14 Monocyte differentiation antigen CD14	0	ELTLEDLK	Label:13C(6)15N(2)(K)@8		-0.0508569	967.481	484.748	967.532	484.773	2	6	15.1272
2	13.62	13.62	13.62	IPI:IPI00967977.1; IPI:IPI00029260.2	Gene_Symbol=CD14 23 kDa protein; Gene_Symbol=CD14 Monocyte differentiation antigen CD14	0	ELTLEDLK	Label:13C(6)15N(2)(K)@8		-0.0410913	967.491	484.753	967.532	484.773	2	8	15.1554
2	13.62	13.62	13.62	IPI:IPI00967977.1; IPI:IPI00029260.2	Gene_Symbol=CD14 23 kDa protein; Gene_Symbol=CD14 Monocyte differentiation antigen CD14	0	ELTLEDLK	Label:13C(6)15N(2)(K)@8		-0.0453027	967.486	484.75	967.532	484.773	2	8	16.998
2	13.62	13.62	13.62	IPI:IPI00967977.1; IPI:IPI00029260.2	Gene_Symbol=CD14 23 kDa protein; Gene_Symbol=CD14 Monocyte differentiation antigen CD14	0	ELTLEDLK			0.302331	959.82	480.917	959.518	480.766	2	7	17.1316
2	13.62	13.62	13.62	IPI:IPI00967977.1; IPI:IPI00029260.2	Gene_Symbol=CD14 23 kDa protein; Gene_Symbol=CD14 Monocyte differentiation antigen CD14	99	LKELTLEDLK	Label:13C(6)15N(2)(K)@2; Label:13C(6)15N(2)(K)@10		-0.0136885	1216.71	406.578	1216.72	406.582	3	15	15.7732
2	13.62	13.62	13.62	IPI:IPI00967977.1; IPI:IPI00029260.2	Gene_Symbol=CD14 23 kDa protein; Gene_Symbol=CD14 Monocyte differentiation antigen CD14	99	LKELTLEDLK	Label:13C(6)15N(2)(K)@2; Label:13C(6)15N(2)(K)@10		-0.0052656	1216.72	406.58	1216.72	406.582	3	15	15.797
2	13.62	13.62	13.62	IPI:IPI00967977.1; IPI:IPI00029260.2	Gene_Symbol=CD14 23 kDa protein; Gene_Symbol=CD14 Monocyte differentiation antigen CD14	99	LKELTLEDLK	Label:13C(6)15N(2)(K)@2; Label:13C(6)15N(2)(K)@10		-0.0330843	1216.69	609.353	1216.72	609.37	2	15	15.803
2	1.472	1.472	1.472	IPI:IPI00937598.2; IPI:IPI00892604.1; IPI:IPI00892547.1; IPI:IPI00889723.2; IPI:IPI00887154.2; IPI:IPI00843913.3; IPI:IPI00654875.1; IPI:IPI00643525.1; IPI:IPI00418163.3; IPI:IPI00032258.4	Gene_Symbol=LOC100294156 similar to C4A protein isoform 2; Gene_Symbol=C4A;LOC100292046;C4B Complement component C4B (Childo blood group) 2; Gene_Symbol=LOC100294156 Complement component 4A; Gene_Symbol=C4A C4A protein; Gene_Symbol=LOC100293534 Complement component 4B; Gene_Symbol=C4B Complement component 4A; Gene_Symbol=C4B Complement C4-B; Gene_Symbol=C4A Putative uncharacterized protein C4A; G…	99	VGDTLNLNLR	Label:13C(6)15N(4)(R)@10		-0.0658766	1123.56	562.786	1123.62	562.819	2	15	15.8268
2	1.472	1.472	1.472	IPI:IPI00937598.2; IPI:IPI00892604.1; IPI:IPI00892547.1; IPI:IPI00889723.2; IPI:IPI00887154.2; IPI:IPI00843913.3; IPI:IPI00654875.1; IPI:IPI00643525.1; IPI:IPI00418163.3; IPI:IPI00032258.4	Gene_Symbol=LOC100294156 similar to C4A protein isoform 2; Gene_Symbol=C4A;LOC100292046;C4B Complement component C4B (Childo blood group) 2; Gene_Symbol=LOC100294156 Complement component 4A; Gene_Symbol=C4A C4A protein; Gene_Symbol=LOC100293534 Complement component 4B; Gene_Symbol=C4B Complement component 4A; Gene_Symbol=C4B Complement C4-B; Gene_Symbol=C4A Putative uncharacterized protein C4A; G…	99	VLSLAQEQVGGSPEK	Label:13C(6)15N(2)(K)@15		-0.0784288	1548.75	775.38	1548.82	775.419	2	14	12.0245
2	1.472	1.472	1.472	IPI:IPI00937598.2; IPI:IPI00892604.1; IPI:IPI00892547.1; IPI:IPI00889723.2; IPI:IPI00887154.2; IPI:IPI00843913.3; IPI:IPI00654875.1; IPI:IPI00643525.1; IPI:IPI00418163.3; IPI:IPI00032258.4	Gene_Symbol=LOC100294156 similar to C4A protein isoform 2; Gene_Symbol=C4A;LOC100292046;C4B Complement component C4B (Childo blood group) 2; Gene_Symbol=LOC100294156 Complement component 4A; Gene_Symbol=C4A C4A protein; Gene_Symbol=LOC100293534 Complement component 4B; Gene_Symbol=C4B Complement component 4A; Gene_Symbol=C4B Complement C4-B; Gene_Symbol=C4A Putative uncharacterized protein C4A; G…	99	VGDTLNLNLR	Label:13C(6)15N(4)(R)@10		-0.0273024	1123.6	562.805	1123.62	562.819	2	15	15.8628
2	1.472	1.472	1.472	IPI:IPI00937598.2; IPI:IPI00892604.1; IPI:IPI00892547.1; IPI:IPI00889723.2; IPI:IPI00887154.2; IPI:IPI00843913.3; IPI:IPI00654875.1; IPI:IPI00643525.1; IPI:IPI00418163.3; IPI:IPI00032258.4	Gene_Symbol=LOC100294156 similar to C4A protein isoform 2; Gene_Symbol=C4A;LOC100292046;C4B Complement component C4B (Childo blood group) 2; Gene_Symbol=LOC100294156 Complement component 4A; Gene_Symbol=C4A C4A protein; Gene_Symbol=LOC100293534 Complement component 4B; Gene_Symbol=C4B Complement component 4A; Gene_Symbol=C4B Complement C4-B; Gene_Symbol=C4A Putative uncharacterized protein C4A; G…	99	VLSLAQEQVGGSPEK	Label:13C(6)15N(2)(K)@15		-0.0587277	1548.77	517.262	1548.82	517.282	3	13	11.8677
2	1.472	1.472	1.472	IPI:IPI00937598.2; IPI:IPI00892604.1; IPI:IPI00892547.1; IPI:IPI00889723.2; IPI:IPI00887154.2; IPI:IPI00843913.3; IPI:IPI00654875.1; IPI:IPI00643525.1; IPI:IPI00418163.3; IPI:IPI00032258.4	Gene_Symbol=LOC100294156 similar to C4A protein isoform 2; Gene_Symbol=C4A;LOC100292046;C4B Complement component C4B (Childo blood group) 2; Gene_Symbol=LOC100294156 Complement component 4A; Gene_Symbol=C4A C4A protein; Gene_Symbol=LOC100293534 Complement component 4B; Gene_Symbol=C4B Complement component 4A; Gene_Symbol=C4B Complement C4-B; Gene_Symbol=C4A Putative uncharacterized protein C4A; G…	99	VLSLAQEQVGGSPEK	Label:13C(6)15N(2)(K)@15		-0.0436388	1548.78	775.397	1548.82	775.419	2	14	11.9944
2	1.472	1.472	1.472	IPI:IPI00937598.2; IPI:IPI00892604.1; IPI:IPI00892547.1; IPI:IPI00889723.2; IPI:IPI00887154.2; IPI:IPI00843913.3; IPI:IPI00654875.1; IPI:IPI00643525.1; IPI:IPI00418163.3; IPI:IPI00032258.4	Gene_Symbol=LOC100294156 similar to C4A protein isoform 2; Gene_Symbol=C4A;LOC100292046;C4B Complement component C4B (Childo blood group) 2; Gene_Symbol=LOC100294156 Complement component 4A; Gene_Symbol=C4A C4A protein; Gene_Symbol=LOC100293534 Complement component 4B; Gene_Symbol=C4B Complement component 4A; Gene_Symbol=C4B Complement C4-B; Gene_Symbol=C4A Putative uncharacterized protein C4A; G…	99	VLSLAQEQVGGSPEK	Label:13C(6)15N(2)(K)@15		0.914979	1549.74	775.877	1548.82	775.419	2	12	13.0157
2	1.472	1.472	1.472	IPI:IPI00937598.2; IPI:IPI00892604.1; IPI:IPI00892547.1; IPI:IPI00889723.2; IPI:IPI00887154.2; IPI:IPI00843913.3; IPI:IPI00654875.1; IPI:IPI00643525.1; IPI:IPI00418163.3; IPI:IPI00032258.4	Gene_Symbol=LOC100294156 similar to C4A protein isoform 2; Gene_Symbol=C4A;LOC100292046;C4B Complement component C4B (Childo blood group) 2; Gene_Symbol=LOC100294156 Complement component 4A; Gene_Symbol=C4A C4A protein; Gene_Symbol=LOC100293534 Complement component 4B; Gene_Symbol=C4B Complement component 4A; Gene_Symbol=C4B Complement C4-B; Gene_Symbol=C4A Putative uncharacterized protein C4A; G…	99	VLSLAQEQVGGSPEK	Label:13C(6)15N(2)(K)@15		0.917421	1549.74	775.878	1548.82	775.419	2	11	13.0398
2	1.472	1.472	1.472	IPI:IPI00937598.2; IPI:IPI00892604.1; IPI:IPI00892547.1; IPI:IPI00889723.2; IPI:IPI00887154.2; IPI:IPI00843913.3; IPI:IPI00654875.1; IPI:IPI00643525.1; IPI:IPI00418163.3; IPI:IPI00032258.4	Gene_Symbol=LOC100294156 similar to C4A protein isoform 2; Gene_Symbol=C4A;LOC100292046;C4B Complement component C4B (Childo blood group) 2; Gene_Symbol=LOC100294156 Complement component 4A; Gene_Symbol=C4A C4A protein; Gene_Symbol=LOC100293534 Complement component 4B; Gene_Symbol=C4B Complement component 4A; Gene_Symbol=C4B Complement C4-B; Gene_Symbol=C4A Putative uncharacterized protein C4A; G…	99	VLSLAQEQVGGSPEK	Label:13C(6)15N(2)(K)@15		-0.0444455	1548.78	517.267	1548.82	517.282	3	13	11.8439
2	1.472	1.472	1.472	IPI:IPI00937598.2; IPI:IPI00892604.1; IPI:IPI00892547.1; IPI:IPI00889723.2; IPI:IPI00887154.2; IPI:IPI00843913.3; IPI:IPI00654875.1; IPI:IPI00643525.1; IPI:IPI00418163.3; IPI:IPI00032258.4	Gene_Symbol=LOC100294156 similar to C4A protein isoform 2; Gene_Symbol=C4A;LOC100292046;C4B Complement component C4B (Childo blood group) 2; Gene_Symbol=LOC100294156 Complement component 4A; Gene_Symbol=C4A C4A protein; Gene_Symbol=LOC100293534 Complement component 4B; Gene_Symbol=C4B Complement component 4A; Gene_Symbol=C4B Complement C4-B; Gene_Symbol=C4A Putative uncharacterized protein C4A; G…	28.06	VLSLAQEQVGGSPEK	Label:13C(6)15N(2)(K)@15		-0.000317099	1548.82	517.282	1548.82	517.282	3	12	9.4385
2	1.472	1.472	1.472	IPI:IPI00937598.2; IPI:IPI00892604.1; IPI:IPI00892547.1; IPI:IPI00889723.2; IPI:IPI00887154.2; IPI:IPI00843913.3; IPI:IPI00654875.1; IPI:IPI00643525.1; IPI:IPI00418163.3; IPI:IPI00032258.4	Gene_Symbol=LOC100294156 similar to C4A protein isoform 2; Gene_Symbol=C4A;LOC100292046;C4B Complement component C4B (Childo blood group) 2; Gene_Symbol=LOC100294156 Complement component 4A; Gene_Symbol=C4A C4A protein; Gene_Symbol=LOC100293534 Complement component 4B; Gene_Symbol=C4B Complement component 4A; Gene_Symbol=C4B Complement C4-B; Gene_Symbol=C4A Putative uncharacterized protein C4A; G…	0	VLSLAQEQVGGSPEK	Label:13C(6)15N(2)(K)@15		-0.00599337	1548.82	517.28	1548.82	517.282	3	10	9.4105
2	1.472	1.472	1.472	IPI:IPI00937598.2; IPI:IPI00892604.1; IPI:IPI00892547.1; IPI:IPI00889723.2; IPI:IPI00887154.2; IPI:IPI00843913.3; IPI:IPI00654875.1; IPI:IPI00643525.1; IPI:IPI00418163.3; IPI:IPI00032258.4	Gene_Symbol=LOC100294156 similar to C4A protein isoform 2; Gene_Symbol=C4A;LOC100292046;C4B Complement component C4B (Childo blood group) 2; Gene_Symbol=LOC100294156 Complement component 4A; Gene_Symbol=C4A C4A protein; Gene_Symbol=LOC100293534 Complement component 4B; Gene_Symbol=C4B Complement component 4A; Gene_Symbol=C4B Complement C4-B; Gene_Symbol=C4A Putative uncharacterized protein C4A; G…	0	VLSLAQEQVGGSPEK	Label:13C(6)15N(2)(K)@15		0.92876	1549.75	517.591	1548.82	517.282	3	10	12.8926
2	1.472	1.472	1.472	IPI:IPI00937598.2; IPI:IPI00892604.1; IPI:IPI00892547.1; IPI:IPI00889723.2; IPI:IPI00887154.2; IPI:IPI00843913.3; IPI:IPI00654875.1; IPI:IPI00643525.1; IPI:IPI00418163.3; IPI:IPI00032258.4	Gene_Symbol=LOC100294156 similar to C4A protein isoform 2; Gene_Symbol=C4A;LOC100292046;C4B Complement component C4B (Childo blood group) 2; Gene_Symbol=LOC100294156 Complement component 4A; Gene_Symbol=C4A C4A protein; Gene_Symbol=LOC100293534 Complement component 4B; Gene_Symbol=C4B Complement component 4A; Gene_Symbol=C4B Complement C4-B; Gene_Symbol=C4A Putative uncharacterized protein C4A; G…	0	VLSLAQEQVGGSPEK	Label:13C(6)15N(2)(K)@15		0.929309	1549.75	517.592	1548.82	517.282	3	10	12.9164
2	2.724	2.724	2.724	IPI:IPI00291136.4	Gene_Symbol=COL6A1 Collagen alpha-1(VI) chain	99	GLEQLLVGGSHLK	Label:13C(6)15N(2)(K)@13		-0.0660814	1357.71	679.865	1357.78	679.898	2	17	19.5795
2	2.724	2.724	2.724	IPI:IPI00291136.4	Gene_Symbol=COL6A1 Collagen alpha-1(VI) chain	99	TAEYDVAYGESHLFR	Label:13C(6)15N(4)(R)@15		-0.0831244	1766.73	884.373	1766.81	884.414	2	14	17.2077
2	2.724	2.724	2.724	IPI:IPI00291136.4	Gene_Symbol=COL6A1 Collagen alpha-1(VI) chain	99	GLEQLLVGGSHLK	Label:13C(6)15N(2)(K)@13		-0.0568041	1357.72	679.869	1357.78	679.898	2	12	19.5556
2	2.724	2.724	2.724	IPI:IPI00291136.4	Gene_Symbol=COL6A1 Collagen alpha-1(VI) chain	0	GLEQLLVGGSHLK	Label:13C(6)15N(2)(K)@13		0.027228	1357.81	453.61	1357.78	453.601	3	11	19.5258
2	2.724	2.724	2.724	IPI:IPI00291136.4	Gene_Symbol=COL6A1 Collagen alpha-1(VI) chain	0	GLEQLLVGGSHLK	Label:13C(6)15N(2)(K)@13		0.00150171	1357.78	453.601	1357.78	453.601	3	10	19.5496
2	2.724	2.724	2.724	IPI:IPI00291136.4	Gene_Symbol=COL6A1 Collagen alpha-1(VI) chain	99	TAEYDVAYGESHLFR	Label:13C(6)15N(4)(R)@15		-0.0527422	1766.76	589.928	1766.81	589.945	3	15	16.0808
2	2.724	2.724	2.724	IPI:IPI00291136.4	Gene_Symbol=COL6A1 Collagen alpha-1(VI) chain	99	TAEYDVAYGESHLFR	Label:13C(6)15N(4)(R)@15		-0.0278399	1766.79	589.936	1766.81	589.945	3	15	17.1957
2	2.724	2.724	2.724	IPI:IPI00291136.4	Gene_Symbol=COL6A1 Collagen alpha-1(VI) chain	99	TAEYDVAYGESHLFR	Label:13C(6)15N(4)(R)@15		-0.0734809	1766.74	884.378	1766.81	884.414	2	13	17.2315
2	2.724	2.724	2.724	IPI:IPI00291136.4	Gene_Symbol=COL6A1 Collagen alpha-1(VI) chain	99	TAEYDVAYGESHLFR	Label:13C(6)15N(4)(R)@15		-0.0355303	1766.78	589.933	1766.81	589.945	3	14	17.1719
2	2.724	2.724	2.724	IPI:IPI00291136.4	Gene_Symbol=COL6A1 Collagen alpha-1(VI) chain	98.97	TAEYDVAYGESHLFR	Label:13C(6)15N(4)(R)@15		-0.0377276	1766.78	589.933	1766.81	589.945	3	13	16.8786
2	2.724	2.724	2.724	IPI:IPI00291136.4	Gene_Symbol=COL6A1 Collagen alpha-1(VI) chain	0	TAEYDVAYGESHLFR	Label:13C(6)15N(4)(R)@15		-0.00586721	1766.81	589.943	1766.81	589.945	3	7	12.9847
2	0.7728	0.7728	0.7728	IPI:IPI00160130.4	Gene_Symbol=CUBN Cubilin	99	DGVDSDAPILSK			0.349797	1215.95	608.981	1215.6	608.806	2	13	12.0608
2	0.7728	0.7728	0.7728	IPI:IPI00160130.4	Gene_Symbol=CUBN Cubilin	99	SAVTGSCVNDGVHIIR	Propionamide(C)@7; Deamidated(N)@9		0.171854	1699.01	567.343	1698.84	567.286	3	18	11.0596
2	0.7728	0.7728	0.7728	IPI:IPI00160130.4	Gene_Symbol=CUBN Cubilin	99	DGVDSDAPILSK	Label:13C(6)15N(2)(K)@12		-0.0600322	1223.55	612.784	1223.61	612.814	2	16	11.3366
2	0.7728	0.7728	0.7728	IPI:IPI00160130.4	Gene_Symbol=CUBN Cubilin	99	DGVDSDAPILSK	Label:13C(6)15N(2)(K)@12		-0.0552715	1223.56	612.786	1223.61	612.814	2	15	11.3737
2	0.7728	0.7728	0.7728	IPI:IPI00160130.4	Gene_Symbol=CUBN Cubilin	99	DGVDSDAPILSK			0.402165	1216	609.008	1215.6	608.806	2	13	12.0981
2	0.7728	0.7728	0.7728	IPI:IPI00160130.4	Gene_Symbol=CUBN Cubilin	99	DGVDSDAPILSK	Label:13C(6)15N(2)(K)@12		-0.0571025	1223.56	612.785	1223.61	612.814	2	14	12.3669
2	0.7728	0.7728	0.7728	IPI:IPI00160130.4	Gene_Symbol=CUBN Cubilin	99	DGVDSDAPILSK	Label:13C(6)15N(2)(K)@12		-0.0553935	1223.56	612.786	1223.61	612.814	2	15	12.3909
2	0.7728	0.7728	0.7728	IPI:IPI00160130.4	Gene_Symbol=CUBN Cubilin	99	SAVTGSCVNDGVHIIR	Propionamide(C)@7; Label:13C(6)15N(4)(R)@16		-0.0102358	1707.85	570.291	1707.86	570.294	3	18	10.8568
2	0.7728	0.7728	0.7728	IPI:IPI00160130.4	Gene_Symbol=CUBN Cubilin	99	SAVTGSCVNDGVHIIR	Propionamide(C)@7; Label:13C(6)15N(4)(R)@16		-0.00602438	1707.85	570.292	1707.86	570.294	3	15	10.8807
2	0.7728	0.7728	0.7728	IPI:IPI00160130.4	Gene_Symbol=CUBN Cubilin	99	SAVTGSCVNDGVHIIR	Propionamide(C)@7; Label:13C(6)15N(4)(R)@16		-0.0758963	1707.78	854.899	1707.86	854.937	2	12	10.9167
2	0.7728	0.7728	0.7728	IPI:IPI00160130.4	Gene_Symbol=CUBN Cubilin	99	SAVTGSCVNDGVHIIR	Propionamide(C)@7; Label:13C(6)15N(4)(R)@16		-0.0843192	1707.78	854.895	1707.86	854.937	2	13	10.9405
2	0.7728	0.7728	0.7728	IPI:IPI00160130.4	Gene_Symbol=CUBN Cubilin	99	SAVTGSCVNDGVHIIR	Propionamide(C)@7; Deamidated(N)@9; Label:13C(6)15N(4)(R)@16		0.156933	1709	570.674	1708.84	570.622	3	16	12.0675
2	0.7728	0.7728	0.7728	IPI:IPI00160130.4	Gene_Symbol=CUBN Cubilin	99	SAVTGSCVNDGVHIIR	Propionamide(C)@7; Deamidated(N)@9; Label:13C(6)15N(4)(R)@16		0.0814932	1708.93	570.649	1708.84	570.622	3	15	12.2402
2	2.008	2.008	2.008	IPI:IPI00947307.1; IPI:IPI00946976.1; IPI:IPI00017601.1	Gene_Symbol=CP cDNA FLJ58075, highly similar to Ceruloplasmin; Gene_Symbol=CP Putative uncharacterized protein CP; Gene_Symbol=CP Ceruloplasmin	99	LISVDTEHSNIYLQNGPDR	Deamidated(N)@10		-0.949601	2170.1	724.374	2171.05	724.69	3	14	14.517
2	2.008	2.008	2.008	IPI:IPI00947307.1; IPI:IPI00946976.1; IPI:IPI00017601.1	Gene_Symbol=CP cDNA FLJ58075, highly similar to Ceruloplasmin; Gene_Symbol=CP Putative uncharacterized protein CP; Gene_Symbol=CP Ceruloplasmin	28.06	LISVDTEHSNIYLQNGPDR	Deamidated(N)@10; Label:13C(6)15N(4)(R)@19		-1.04802	2180.01	727.677	2181.06	728.027	3	14	14.4863
2	2.008	2.008	2.008	IPI:IPI00947307.1; IPI:IPI00946976.1; IPI:IPI00017601.1	Gene_Symbol=CP cDNA FLJ58075, highly similar to Ceruloplasmin; Gene_Symbol=CP Putative uncharacterized protein CP; Gene_Symbol=CP Ceruloplasmin	0	LISVDTEHSNIYLQNGPDR	Label:13C(6)15N(4)(R)@19		-0.0532004	2180.02	727.681	2180.07	727.699	3	12	14.4624
2	2.008	2.008	2.008	IPI:IPI00947307.1; IPI:IPI00946976.1; IPI:IPI00017601.1	Gene_Symbol=CP cDNA FLJ58075, highly similar to Ceruloplasmin; Gene_Symbol=CP Putative uncharacterized protein CP; Gene_Symbol=CP Ceruloplasmin	0	LISVDTEHSNIYLQNGPDR	Deamidated(N)@10		1.44176	2172.49	725.171	2171.05	724.69	3	12	14.5535
2	2.008	2.008	2.008	IPI:IPI00947307.1; IPI:IPI00946976.1; IPI:IPI00017601.1	Gene_Symbol=CP cDNA FLJ58075, highly similar to Ceruloplasmin; Gene_Symbol=CP Putative uncharacterized protein CP; Gene_Symbol=CP Ceruloplasmin	0	LISVDTEHSNIYLQNGPDR	Label:13C(6)15N(4)(R)@19		-0.0227571	2180.05	546.02	2180.07	546.026	4	13	14.6157
2	1.261	1.261	1.261	IPI:IPI00883772.1; IPI:IPI00293088.6	Gene_Symbol=GAA lysosomal alpha-glucosidase preproprotein; Gene_Symbol=GAA Lysosomal alpha-glucosidase	99	VTSEGAGLQLQK	Label:13C(6)15N(2)(K)@12		-0.0628764	1237.61	619.814	1237.68	619.845	2	15	9.3661
2	1.842	1.842	1.842	IPI:IPI00879931.1; IPI:IPI00556459.1; IPI:IPI00291866.5	Gene_Symbol=SERPING1 cDNA FLJ58826, highly similar to Plasma protease C1 inhibitor; Gene_Symbol=SERPING1 Serine/cysteine proteinase inhibitor clade G member 1 splice variant 2 (Fragment); Gene_Symbol=SERPING1 Plasma protease C1 inhibitor	99	FQPTLLTLPR	Label:13C(6)15N(4)(R)@10		-0.0419582	1194.66	598.336	1194.7	598.357	2	10	21.4077
2	1.844	1.844	1.844	IPI:IPI00796316.4; IPI:IPI00647556.2; IPI:IPI00646773.2; IPI:IPI00513782.3; IPI:IPI00377087.4; IPI:IPI00026314.1	Gene_Symbol=GSN cDNA FLJ53327, highly similar to Gelsolin; Gene_Symbol=GSN gelsolin isoform c; Gene_Symbol=GSN Isoform 2 of Gelsolin; Gene_Symbol=GSN cDNA FLJ35478 fis, clone SMINT2007796, highly similar to Gelsolin; Gene_Symbol=GSN Gelsolin; Gene_Symbol=GSN Isoform 1 of Gelsolin	99	AGALNSNDAFVLK			-0.0384833	1318.65	660.332	1318.69	660.351	2	13	16.1773
2	1.844	1.844	1.844	IPI:IPI00796316.4; IPI:IPI00647556.2; IPI:IPI00646773.2; IPI:IPI00513782.3; IPI:IPI00377087.4; IPI:IPI00026314.1	Gene_Symbol=GSN cDNA FLJ53327, highly similar to Gelsolin; Gene_Symbol=GSN gelsolin isoform c; Gene_Symbol=GSN Isoform 2 of Gelsolin; Gene_Symbol=GSN cDNA FLJ35478 fis, clone SMINT2007796, highly similar to Gelsolin; Gene_Symbol=GSN Gelsolin; Gene_Symbol=GSN Isoform 1 of Gelsolin	99	AGALNSNDAFVLK	Label:13C(6)15N(2)(K)@13		-0.03132	1326.67	664.343	1326.7	664.358	2	12	15.949
2	1.844	1.844	1.844	IPI:IPI00796316.4; IPI:IPI00647556.2; IPI:IPI00646773.2; IPI:IPI00513782.3; IPI:IPI00377087.4; IPI:IPI00026314.1	Gene_Symbol=GSN cDNA FLJ53327, highly similar to Gelsolin; Gene_Symbol=GSN gelsolin isoform c; Gene_Symbol=GSN Isoform 2 of Gelsolin; Gene_Symbol=GSN cDNA FLJ35478 fis, clone SMINT2007796, highly similar to Gelsolin; Gene_Symbol=GSN Gelsolin; Gene_Symbol=GSN Isoform 1 of Gelsolin	99	AGALNSNDAFVLK	Label:13C(6)15N(2)(K)@13		-0.0178923	1326.68	664.35	1326.7	664.358	2	13	16.0244
2	1.844	1.844	1.844	IPI:IPI00796316.4; IPI:IPI00647556.2; IPI:IPI00646773.2; IPI:IPI00513782.3; IPI:IPI00377087.4; IPI:IPI00026314.1	Gene_Symbol=GSN cDNA FLJ53327, highly similar to Gelsolin; Gene_Symbol=GSN gelsolin isoform c; Gene_Symbol=GSN Isoform 2 of Gelsolin; Gene_Symbol=GSN cDNA FLJ35478 fis, clone SMINT2007796, highly similar to Gelsolin; Gene_Symbol=GSN Gelsolin; Gene_Symbol=GSN Isoform 1 of Gelsolin	99	AGALNSNDAFVLK	Deamidated(N)@5; Label:13C(6)15N(2)(K)@13		-0.0532994	1327.63	664.824	1327.69	664.85	2	15	16.9681
2	1.844	1.844	1.844	IPI:IPI00796316.4; IPI:IPI00647556.2; IPI:IPI00646773.2; IPI:IPI00513782.3; IPI:IPI00377087.4; IPI:IPI00026314.1	Gene_Symbol=GSN cDNA FLJ53327, highly similar to Gelsolin; Gene_Symbol=GSN gelsolin isoform c; Gene_Symbol=GSN Isoform 2 of Gelsolin; Gene_Symbol=GSN cDNA FLJ35478 fis, clone SMINT2007796, highly similar to Gelsolin; Gene_Symbol=GSN Gelsolin; Gene_Symbol=GSN Isoform 1 of Gelsolin	99	AGALNSNDAFVLK	Deamidated(N)@7; Label:13C(6)15N(2)(K)@13		-0.0673375	1327.62	664.817	1327.69	664.85	2	13	16.9919
2	1.844	1.844	1.844	IPI:IPI00796316.4; IPI:IPI00647556.2; IPI:IPI00646773.2; IPI:IPI00513782.3; IPI:IPI00377087.4; IPI:IPI00026314.1	Gene_Symbol=GSN cDNA FLJ53327, highly similar to Gelsolin; Gene_Symbol=GSN gelsolin isoform c; Gene_Symbol=GSN Isoform 2 of Gelsolin; Gene_Symbol=GSN cDNA FLJ35478 fis, clone SMINT2007796, highly similar to Gelsolin; Gene_Symbol=GSN Gelsolin; Gene_Symbol=GSN Isoform 1 of Gelsolin	99	AGALNSNDAFVLK	Label:13C(6)15N(2)(K)@13		0.842416	1327.54	443.522	1326.7	443.241	3	12	16.2144
3	2.681	2.681	2.681	IPI:IPI00940485.1; IPI:IPI00939169.1; IPI:IPI00218460.7; IPI:IPI00162735.3; IPI:IPI00027235.1	Gene_Symbol=ATRN Putative uncharacterized protein ATRN; Gene_Symbol=ATRN Isoform 3 of Attractin; Gene_Symbol=ATRN Putative uncharacterized protein ATRN; Gene_Symbol=ATRN Isoform 2 of Attractin; Gene_Symbol=ATRN Isoform 1 of Attractin	99	EQYAVVGHSAHIVTLK	Label:13C(6)15N(2)(K)@16		-0.0834124	1758.87	880.441	1758.95	880.483	2	14	10.9913
3	2.681	2.681	2.681	IPI:IPI00940485.1; IPI:IPI00939169.1; IPI:IPI00218460.7; IPI:IPI00162735.3; IPI:IPI00027235.1	Gene_Symbol=ATRN Putative uncharacterized protein ATRN; Gene_Symbol=ATRN Isoform 3 of Attractin; Gene_Symbol=ATRN Putative uncharacterized protein ATRN; Gene_Symbol=ATRN Isoform 2 of Attractin; Gene_Symbol=ATRN Isoform 1 of Attractin	99	HCETCISGFYGDPTNGGK	Propionamide(C)@2; Propionamide(C)@5; Label:13C(6)15N(2)(K)@18		-0.0752659	2034.79	679.271	2034.87	679.296	3	13	11.9891
3	2.681	2.681	2.681	IPI:IPI00940485.1; IPI:IPI00939169.1; IPI:IPI00218460.7; IPI:IPI00162735.3; IPI:IPI00027235.1	Gene_Symbol=ATRN Putative uncharacterized protein ATRN; Gene_Symbol=ATRN Isoform 3 of Attractin; Gene_Symbol=ATRN Putative uncharacterized protein ATRN; Gene_Symbol=ATRN Isoform 2 of Attractin; Gene_Symbol=ATRN Isoform 1 of Attractin	99	EQYAVVGHSAHIVTLK	Label:13C(6)15N(2)(K)@16		0.0446871	1759	587.339	1758.95	587.324	3	16	10.9167
3	2.681	2.681	2.681	IPI:IPI00940485.1; IPI:IPI00939169.1; IPI:IPI00218460.7; IPI:IPI00162735.3; IPI:IPI00027235.1	Gene_Symbol=ATRN Putative uncharacterized protein ATRN; Gene_Symbol=ATRN Isoform 3 of Attractin; Gene_Symbol=ATRN Putative uncharacterized protein ATRN; Gene_Symbol=ATRN Isoform 2 of Attractin; Gene_Symbol=ATRN Isoform 1 of Attractin	99	EQYAVVGHSAHIVTLK	Label:13C(6)15N(2)(K)@16		-0.0507109	1758.9	587.307	1758.95	587.324	3	14	10.8866
3	2.681	2.681	2.681	IPI:IPI00940485.1; IPI:IPI00939169.1; IPI:IPI00218460.7; IPI:IPI00162735.3; IPI:IPI00027235.1	Gene_Symbol=ATRN Putative uncharacterized protein ATRN; Gene_Symbol=ATRN Isoform 3 of Attractin; Gene_Symbol=ATRN Putative uncharacterized protein ATRN; Gene_Symbol=ATRN Isoform 2 of Attractin; Gene_Symbol=ATRN Isoform 1 of Attractin	17.06	EQYAVVGHSAHIVTLK	Label:13C(6)15N(2)(K)@16		0.944515	1759.9	440.981	1758.95	440.745	4	12	10.8804
3	2.681	2.681	2.681	IPI:IPI00940485.1; IPI:IPI00939169.1; IPI:IPI00218460.7; IPI:IPI00162735.3; IPI:IPI00027235.1	Gene_Symbol=ATRN Putative uncharacterized protein ATRN; Gene_Symbol=ATRN Isoform 3 of Attractin; Gene_Symbol=ATRN Putative uncharacterized protein ATRN; Gene_Symbol=ATRN Isoform 2 of Attractin; Gene_Symbol=ATRN Isoform 1 of Attractin	18.53	HCETCISGFYGDPTNGGK	Propionamide(C)@2; Propionamide(C)@5; Label:13C(6)15N(2)(K)@18		-0.100718	2034.76	679.262	2034.87	679.296	3	12	12.0129
3	1.472	1.472	1.472	IPI:IPI00937598.2; IPI:IPI00892604.1; IPI:IPI00892547.1; IPI:IPI00889723.2; IPI:IPI00887154.2; IPI:IPI00843913.3; IPI:IPI00654875.1; IPI:IPI00643525.1; IPI:IPI00418163.3; IPI:IPI00032258.4	Gene_Symbol=LOC100294156 similar to C4A protein isoform 2; Gene_Symbol=C4A;LOC100292046;C4B Complement component C4B (Childo blood group) 2; Gene_Symbol=LOC100294156 Complement component 4A; Gene_Symbol=C4A C4A protein; Gene_Symbol=LOC100293534 Complement component 4B; Gene_Symbol=C4B Complement component 4A; Gene_Symbol=C4B Complement C4-B; Gene_Symbol=C4A Putative uncharacterized protein C4A; G…	99	VGDTLNLNLR	Label:13C(6)15N(4)(R)@10		-0.0410963	1123.58	562.798	1123.62	562.819	2	14	15.8703
3	1.472	1.472	1.472	IPI:IPI00937598.2; IPI:IPI00892604.1; IPI:IPI00892547.1; IPI:IPI00889723.2; IPI:IPI00887154.2; IPI:IPI00843913.3; IPI:IPI00654875.1; IPI:IPI00643525.1; IPI:IPI00418163.3; IPI:IPI00032258.4	Gene_Symbol=LOC100294156 similar to C4A protein isoform 2; Gene_Symbol=C4A;LOC100292046;C4B Complement component C4B (Childo blood group) 2; Gene_Symbol=LOC100294156 Complement component 4A; Gene_Symbol=C4A C4A protein; Gene_Symbol=LOC100293534 Complement component 4B; Gene_Symbol=C4B Complement component 4A; Gene_Symbol=C4B Complement C4-B; Gene_Symbol=C4A Putative uncharacterized protein C4A; G…	99	VLSLAQEQVGGSPEK	Label:13C(6)15N(2)(K)@15		-0.0868517	1548.74	775.376	1548.82	775.419	2	15	12.0434
3	1.472	1.472	1.472	IPI:IPI00937598.2; IPI:IPI00892604.1; IPI:IPI00892547.1; IPI:IPI00889723.2; IPI:IPI00887154.2; IPI:IPI00843913.3; IPI:IPI00654875.1; IPI:IPI00643525.1; IPI:IPI00418163.3; IPI:IPI00032258.4	Gene_Symbol=LOC100294156 similar to C4A protein isoform 2; Gene_Symbol=C4A;LOC100292046;C4B Complement component C4B (Childo blood group) 2; Gene_Symbol=LOC100294156 Complement component 4A; Gene_Symbol=C4A C4A protein; Gene_Symbol=LOC100293534 Complement component 4B; Gene_Symbol=C4B Complement component 4A; Gene_Symbol=C4B Complement C4-B; Gene_Symbol=C4A Putative uncharacterized protein C4A; G…	99	VGDTLNLNLR	Label:13C(6)15N(4)(R)@10		-0.0273024	1123.6	562.805	1123.62	562.819	2	13	15.8463
3	1.472	1.472	1.472	IPI:IPI00937598.2; IPI:IPI00892604.1; IPI:IPI00892547.1; IPI:IPI00889723.2; IPI:IPI00887154.2; IPI:IPI00843913.3; IPI:IPI00654875.1; IPI:IPI00643525.1; IPI:IPI00418163.3; IPI:IPI00032258.4	Gene_Symbol=LOC100294156 similar to C4A protein isoform 2; Gene_Symbol=C4A;LOC100292046;C4B Complement component C4B (Childo blood group) 2; Gene_Symbol=LOC100294156 Complement component 4A; Gene_Symbol=C4A C4A protein; Gene_Symbol=LOC100293534 Complement component 4B; Gene_Symbol=C4B Complement component 4A; Gene_Symbol=C4B Complement C4-B; Gene_Symbol=C4A Putative uncharacterized protein C4A; G…	99	VLSLAQEQVGGSPEK	Label:13C(6)15N(2)(K)@15		-0.0618272	1548.76	775.388	1548.82	775.419	2	15	12.0192
3	3.151	3.151	3.151	IPI:IPI00883772.1; IPI:IPI00293088.6	Gene_Symbol=GAA lysosomal alpha-glucosidase preproprotein; Gene_Symbol=GAA Lysosomal alpha-glucosidase	99	AGYIIPLQGPGLTTTESR	Label:13C(6)15N(4)(R)@18		-0.107193	1882.9	942.455	1883	942.509	2	13	20.5153
3	3.151	3.151	3.151	IPI:IPI00883772.1; IPI:IPI00293088.6	Gene_Symbol=GAA lysosomal alpha-glucosidase preproprotein; Gene_Symbol=GAA Lysosomal alpha-glucosidase	99	VTSEGAGLQLQK	Label:13C(6)15N(2)(K)@12		-0.0338064	1237.64	413.555	1237.68	413.566	3	14	9.4888
3	3.151	3.151	3.151	IPI:IPI00883772.1; IPI:IPI00293088.6	Gene_Symbol=GAA lysosomal alpha-glucosidase preproprotein; Gene_Symbol=GAA Lysosomal alpha-glucosidase	99	AGYIIPLQGPGLTTTESR	Label:13C(6)15N(4)(R)@18		-0.0622843	1882.94	628.654	1883	628.675	3	16	17.5542
3	3.151	3.151	3.151	IPI:IPI00883772.1; IPI:IPI00293088.6	Gene_Symbol=GAA lysosomal alpha-glucosidase preproprotein; Gene_Symbol=GAA Lysosomal alpha-glucosidase	99	AGYIIPLQGPGLTTTESR	Label:13C(6)15N(4)(R)@18		-0.103897	1882.9	942.457	1883	942.509	2	12	20.4554
3	3.151	3.151	3.151	IPI:IPI00883772.1; IPI:IPI00293088.6	Gene_Symbol=GAA lysosomal alpha-glucosidase preproprotein; Gene_Symbol=GAA Lysosomal alpha-glucosidase	99	AGYIIPLQGPGLTTTESR	Label:13C(6)15N(4)(R)@18		-0.0674113	1882.94	628.652	1883	628.675	3	16	20.4793
3	3.151	3.151	3.151	IPI:IPI00883772.1; IPI:IPI00293088.6	Gene_Symbol=GAA lysosomal alpha-glucosidase preproprotein; Gene_Symbol=GAA Lysosomal alpha-glucosidase	99	AGYIIPLQGPGLTTTESR	Label:13C(6)15N(4)(R)@18		-0.0815104	1882.92	628.648	1883	628.675	3	21	20.5274
3	3.151	3.151	3.151	IPI:IPI00883772.1; IPI:IPI00293088.6	Gene_Symbol=GAA lysosomal alpha-glucosidase preproprotein; Gene_Symbol=GAA Lysosomal alpha-glucosidase	48.59	AGYIIPLQGPGLTTTESR	Label:13C(6)15N(4)(R)@18		0.878403	1883.88	942.948	1883	942.509	2	9	21.4771
3	3.151	3.151	3.151	IPI:IPI00883772.1; IPI:IPI00293088.6	Gene_Symbol=GAA lysosomal alpha-glucosidase preproprotein; Gene_Symbol=GAA Lysosomal alpha-glucosidase	24.78	AGYIIPLQGPGLTTTESR	Label:13C(6)15N(4)(R)@18		-0.039213	1882.96	628.662	1883	628.675	3	13	17.2927
3	3.151	3.151	3.151	IPI:IPI00883772.1; IPI:IPI00293088.6	Gene_Symbol=GAA lysosomal alpha-glucosidase preproprotein; Gene_Symbol=GAA Lysosomal alpha-glucosidase	22.05	AGYIIPLQGPGLTTTESR	Label:13C(6)15N(4)(R)@18		0.87767	1883.88	942.947	1883	942.509	2	10	21.501
3	3.151	3.151	3.151	IPI:IPI00883772.1; IPI:IPI00293088.6	Gene_Symbol=GAA lysosomal alpha-glucosidase preproprotein; Gene_Symbol=GAA Lysosomal alpha-glucosidase	17.06	AGYIIPLQGPGLTTTESR			0.382155	1873.38	937.696	1872.99	937.505	2	9	20.632
3	3.151	3.151	3.151	IPI:IPI00883772.1; IPI:IPI00293088.6	Gene_Symbol=GAA lysosomal alpha-glucosidase preproprotein; Gene_Symbol=GAA Lysosomal alpha-glucosidase	99	VTSEGAGLQLQK	Label:13C(6)15N(2)(K)@12		-0.0515238	1237.62	619.819	1237.68	619.845	2	15	9.2667
3	3.151	3.151	3.151	IPI:IPI00883772.1; IPI:IPI00293088.6	Gene_Symbol=GAA lysosomal alpha-glucosidase preproprotein; Gene_Symbol=GAA Lysosomal alpha-glucosidase	99	VTSEGAGLQLQK	Label:13C(6)15N(2)(K)@12		-0.0489603	1237.63	619.821	1237.68	619.845	2	14	9.2905
3	3.151	3.151	3.151	IPI:IPI00883772.1; IPI:IPI00293088.6	Gene_Symbol=GAA lysosomal alpha-glucosidase preproprotein; Gene_Symbol=GAA Lysosomal alpha-glucosidase	99	VTSEGAGLQLQK	Label:13C(6)15N(2)(K)@12		0.0208506	1237.7	413.573	1237.68	413.566	3	13	9.4221
3	3.151	3.151	3.151	IPI:IPI00883772.1; IPI:IPI00293088.6	Gene_Symbol=GAA lysosomal alpha-glucosidase preproprotein; Gene_Symbol=GAA Lysosomal alpha-glucosidase	0	VTSEGAGLQLQK	Label:13C(6)15N(2)(K)@12		0.920644	1238.6	620.306	1237.68	619.845	2	7	10.2872
3	3.151	3.151	3.151	IPI:IPI00883772.1; IPI:IPI00293088.6	Gene_Symbol=GAA lysosomal alpha-glucosidase preproprotein; Gene_Symbol=GAA Lysosomal alpha-glucosidase	0	VTSEGAGLQLQK	Label:13C(6)15N(2)(K)@12		0.921132	1238.6	620.306	1237.68	619.845	2	8	10.3113
3	4.058	4.058	4.058	IPI:IPI00004573.2	Gene_Symbol=PIGR Polymeric immunoglobulin receptor	99	CPLLVDSEGWVK	Propionamide(C)@1; Label:13C(6)15N(2)(K)@12		-0.07267	1423.65	712.834	1423.73	712.87	2	13	20.2908
3	4.058	4.058	4.058	IPI:IPI00004573.2	Gene_Symbol=PIGR Polymeric immunoglobulin receptor	99	NADLQVLKPEPELVYEDLR	Label:13C(6)15N(2)(K)@8; Label:13C(6)15N(4)(R)@19		-0.103785	2258.09	753.703	2258.19	753.738	3	16	21.5249
3	4.058	4.058	4.058	IPI:IPI00004573.2	Gene_Symbol=PIGR Polymeric immunoglobulin receptor	99	CPLLVDSEGWVK	Propionamide(C)@1; Label:13C(6)15N(2)(K)@12		-0.0644913	1423.66	712.838	1423.73	712.87	2	12	19.2522
3	4.058	4.058	4.058	IPI:IPI00004573.2	Gene_Symbol=PIGR Polymeric immunoglobulin receptor	99	CPLLVDSEGWVK	Propionamide(C)@1; Label:13C(6)15N(2)(K)@12		-0.06559	1423.66	712.837	1423.73	712.87	2	12	20.3248
3	4.058	4.058	4.058	IPI:IPI00004573.2	Gene_Symbol=PIGR Polymeric immunoglobulin receptor	99	CPLLVDSEGWVK	Propionamide(C)@1; Label:13C(6)15N(2)(K)@12		-0.0608292	1423.67	712.84	1423.73	712.87	2	10	19.2931
3	4.058	4.058	4.058	IPI:IPI00004573.2	Gene_Symbol=PIGR Polymeric immunoglobulin receptor	99	NADLQVLKPEPELVYEDLR	Label:13C(6)15N(2)(K)@8; Label:13C(6)15N(4)(R)@19		-0.112208	2258.08	753.7	2258.19	753.738	3	14	21.5488
3	4.695	4.695	4.695	IPI:IPI00967977.1; IPI:IPI00029260.2	Gene_Symbol=CD14 23 kDa protein; Gene_Symbol=CD14 Monocyte differentiation antigen CD14	99	LKELTLEDLK	Label:13C(6)15N(2)(K)@2; Label:13C(6)15N(2)(K)@10		-0.0280622	1216.7	406.573	1216.72	406.582	3	13	15.8401
3	2.769	2.769	2.769	IPI:IPI00967014.1; IPI:IPI00966452.1; IPI:IPI00966202.1; IPI:IPI00009950.1	Gene_Symbol=LMAN2 37 kDa protein; Gene_Symbol=LMAN2 33 kDa protein; Gene_Symbol=LMAN2 22 kDa protein; Gene_Symbol=LMAN2 Vesicular integral-membrane protein VIP36	99	DHDTFLAVR			0.404508	1072.93	537.475	1072.53	537.272	2	12	12.146
3	2.769	2.769	2.769	IPI:IPI00967014.1; IPI:IPI00966452.1; IPI:IPI00966202.1; IPI:IPI00009950.1	Gene_Symbol=LMAN2 37 kDa protein; Gene_Symbol=LMAN2 33 kDa protein; Gene_Symbol=LMAN2 22 kDa protein; Gene_Symbol=LMAN2 Vesicular integral-membrane protein VIP36	99	DHDTFLAVR	Label:13C(6)15N(4)(R)@9		-0.0216075	1082.52	542.266	1082.54	542.276	2	13	12.0734
3	2.769	2.769	2.769	IPI:IPI00967014.1; IPI:IPI00966452.1; IPI:IPI00966202.1; IPI:IPI00009950.1	Gene_Symbol=LMAN2 37 kDa protein; Gene_Symbol=LMAN2 33 kDa protein; Gene_Symbol=LMAN2 22 kDa protein; Gene_Symbol=LMAN2 Vesicular integral-membrane protein VIP36	99	DHDTFLAVR	Label:13C(6)15N(4)(R)@9		-0.0389415	1082.5	542.257	1082.54	542.276	2	12	12.1099
3	2.769	2.769	2.769	IPI:IPI00967014.1; IPI:IPI00966452.1; IPI:IPI00966202.1; IPI:IPI00009950.1	Gene_Symbol=LMAN2 37 kDa protein; Gene_Symbol=LMAN2 33 kDa protein; Gene_Symbol=LMAN2 22 kDa protein; Gene_Symbol=LMAN2 Vesicular integral-membrane protein VIP36	99	DHDTFLAVR			0.459928	1072.99	537.502	1072.53	537.272	2	12	12.2224
3	1.844	1.844	1.844	IPI:IPI00796316.4; IPI:IPI00647556.2; IPI:IPI00646773.2; IPI:IPI00513782.3; IPI:IPI00377087.4; IPI:IPI00026314.1	Gene_Symbol=GSN cDNA FLJ53327, highly similar to Gelsolin; Gene_Symbol=GSN gelsolin isoform c; Gene_Symbol=GSN Isoform 2 of Gelsolin; Gene_Symbol=GSN cDNA FLJ35478 fis, clone SMINT2007796, highly similar to Gelsolin; Gene_Symbol=GSN Gelsolin; Gene_Symbol=GSN Isoform 1 of Gelsolin	99	AGALNSNDAFVLK	Deamidated(N)@5; Label:13C(6)15N(2)(K)@13		-1.10567	1326.58	664.298	1327.69	664.85	2	13	16.1444
3	0.3312	0.3312	0.3312	IPI:IPI00160130.4	Gene_Symbol=CUBN Cubilin	99	DGVDSDAPILSK	Label:13C(6)15N(2)(K)@12		-0.0564922	1223.56	612.785	1223.61	612.814	2	15	12.0496
3	0.3312	0.3312	0.3312	IPI:IPI00160130.4	Gene_Symbol=CUBN Cubilin	99	DGVDSDAPILSK	Label:13C(6)15N(2)(K)@12		-0.0470927	1223.57	612.79	1223.61	612.814	2	18	12.0796
4	2.939	1.878	1.878	IPI:IPI00924951.1; IPI:IPI00024292.2	Gene_Symbol=LRP2 cDNA FLJ61253, highly similar to Low-density lipoprotein receptor-related protein 2; Gene_Symbol=LRP2 Low-density lipoprotein receptor-related protein 2	99	IEHSTFDGLDR	Label:13C(6)15N(4)(R)@11		-0.0627818	1298.55	650.282	1298.61	650.314	2	13	9.8806
4	2.939	1.878	1.878	IPI:IPI00924951.1; IPI:IPI00024292.2	Gene_Symbol=LRP2 cDNA FLJ61253, highly similar to Low-density lipoprotein receptor-related protein 2; Gene_Symbol=LRP2 Low-density lipoprotein receptor-related protein 2	99	VTLITENLGHPR	Label:13C(6)15N(4)(R)@12		-0.063676	1358.69	680.353	1358.75	680.385	2	15	12.6623
4	2.939	1.878	1.878	IPI:IPI00924951.1; IPI:IPI00024292.2	Gene_Symbol=LRP2 cDNA FLJ61253, highly similar to Low-density lipoprotein receptor-related protein 2; Gene_Symbol=LRP2 Low-density lipoprotein receptor-related protein 2	99	IEHSTFDGLDR	Label:13C(6)15N(4)(R)@11		0.00330602	1298.62	433.879	1298.61	433.878	3	16	8.7589
4	2.939	1.878	1.878	IPI:IPI00924951.1; IPI:IPI00024292.2	Gene_Symbol=LRP2 cDNA FLJ61253, highly similar to Low-density lipoprotein receptor-related protein 2; Gene_Symbol=LRP2 Low-density lipoprotein receptor-related protein 2	99	IEHSTFDGLDR	Label:13C(6)15N(4)(R)@11		0.00898229	1298.62	433.881	1298.61	433.878	3	14	8.7827
4	2.939	1.878	1.878	IPI:IPI00924951.1; IPI:IPI00024292.2	Gene_Symbol=LRP2 cDNA FLJ61253, highly similar to Low-density lipoprotein receptor-related protein 2; Gene_Symbol=LRP2 Low-density lipoprotein receptor-related protein 2	99	IEHSTFDGLDR	Label:13C(6)15N(4)(R)@11		-0.0627818	1298.55	650.282	1298.61	650.314	2	10	8.8193
4	2.939	1.878	1.878	IPI:IPI00924951.1; IPI:IPI00024292.2	Gene_Symbol=LRP2 cDNA FLJ61253, highly similar to Low-density lipoprotein receptor-related protein 2; Gene_Symbol=LRP2 Low-density lipoprotein receptor-related protein 2	99	IEHSTFDGLDR	Label:13C(6)15N(4)(R)@11		-0.0465464	1298.57	650.29	1298.61	650.314	2	12	9.7731
4	2.939	1.878	1.878	IPI:IPI00924951.1; IPI:IPI00024292.2	Gene_Symbol=LRP2 cDNA FLJ61253, highly similar to Low-density lipoprotein receptor-related protein 2; Gene_Symbol=LRP2 Low-density lipoprotein receptor-related protein 2	99	IEHSTFDGLDR	Label:13C(6)15N(4)(R)@11		0.118205	1298.73	433.918	1298.61	433.878	3	12	9.8089
4	2.939	1.878	1.878	IPI:IPI00924951.1; IPI:IPI00024292.2	Gene_Symbol=LRP2 cDNA FLJ61253, highly similar to Low-density lipoprotein receptor-related protein 2; Gene_Symbol=LRP2 Low-density lipoprotein receptor-related protein 2	99	IEHSTFDGLDR	Label:13C(6)15N(4)(R)@11		0.138621	1298.75	433.925	1298.61	433.878	3	12	9.8448
4	2.939	1.878	1.878	IPI:IPI00924951.1; IPI:IPI00024292.2	Gene_Symbol=LRP2 cDNA FLJ61253, highly similar to Low-density lipoprotein receptor-related protein 2; Gene_Symbol=LRP2 Low-density lipoprotein receptor-related protein 2	99	IEHSTFDGLDR	Label:13C(6)15N(4)(R)@11		-0.0555796	1298.56	650.286	1298.61	650.314	2	11	9.8508
4	2.939	1.878	1.878	IPI:IPI00924951.1; IPI:IPI00024292.2	Gene_Symbol=LRP2 cDNA FLJ61253, highly similar to Low-density lipoprotein receptor-related protein 2; Gene_Symbol=LRP2 Low-density lipoprotein receptor-related protein 2	99	VTLITENLGHPR	Label:13C(6)15N(4)(R)@12		-0.0432903	1358.71	680.363	1358.75	680.385	2	12	12.6862
4	2.939	1.878	1.878	IPI:IPI00924951.1; IPI:IPI00024292.2	Gene_Symbol=LRP2 cDNA FLJ61253, highly similar to Low-density lipoprotein receptor-related protein 2; Gene_Symbol=LRP2 Low-density lipoprotein receptor-related protein 2	99	VTLITENLGHPR	Deamidated(N)@7; Label:13C(6)15N(4)(R)@12		-0.000250089	1359.74	454.253	1359.74	454.253	3	13	13.5138
4	2.939	1.878	1.878	IPI:IPI00924951.1; IPI:IPI00024292.2	Gene_Symbol=LRP2 cDNA FLJ61253, highly similar to Low-density lipoprotein receptor-related protein 2; Gene_Symbol=LRP2 Low-density lipoprotein receptor-related protein 2	0	VTLITENLGHPR	Label:13C(6)15N(4)(R)@12		0.00396813	1358.76	453.927	1358.75	453.925	3	10	12.0054
4	2.939	1.878	1.878	IPI:IPI00924951.1; IPI:IPI00024292.2	Gene_Symbol=LRP2 cDNA FLJ61253, highly similar to Low-density lipoprotein receptor-related protein 2; Gene_Symbol=LRP2 Low-density lipoprotein receptor-related protein 2	0	VTLITENLGHPR	Label:13C(6)15N(4)(R)@12		-0.0287162	1358.73	453.916	1358.75	453.925	3	10	12.0418
4	2.939	1.878	1.878	IPI:IPI00924951.1; IPI:IPI00024292.2	Gene_Symbol=LRP2 cDNA FLJ61253, highly similar to Low-density lipoprotein receptor-related protein 2; Gene_Symbol=LRP2 Low-density lipoprotein receptor-related protein 2	0	VTLITENLGHPR	Label:13C(6)15N(4)(R)@12		-0.0137016	1358.74	453.921	1358.75	453.925	3	10	13.2293
4	5.437	5.437	5.437	IPI:IPI00847635.1; IPI:IPI00550991.3	Gene_Symbol=SERPINA3 Isoform 1 of Alpha-1-antichymotrypsin; Gene_Symbol=SERPINA3 cDNA FLJ35730 fis, clone TESTI2003131, highly similar to ALPHA-1-ANTICHYMOTRYPSIN	99	DEELSCTVVELK	Propionamide(C)@6; Label:13C(6)15N(2)(K)@12		-0.0775069	1442.63	722.321	1442.71	722.36	2	13	16.5732
4	5.437	5.437	5.437	IPI:IPI00847635.1; IPI:IPI00550991.3	Gene_Symbol=SERPINA3 Isoform 1 of Alpha-1-antichymotrypsin; Gene_Symbol=SERPINA3 cDNA FLJ35730 fis, clone TESTI2003131, highly similar to ALPHA-1-ANTICHYMOTRYPSIN	99	ITLLSALVETR	Label:13C(6)15N(4)(R)@11		-0.0536327	1224.68	613.346	1224.73	613.373	2	13	22.0935
4	5.437	5.437	5.437	IPI:IPI00847635.1; IPI:IPI00550991.3	Gene_Symbol=SERPINA3 Isoform 1 of Alpha-1-antichymotrypsin; Gene_Symbol=SERPINA3 cDNA FLJ35730 fis, clone TESTI2003131, highly similar to ALPHA-1-ANTICHYMOTRYPSIN	99	DEELSCTVVELK	Propionamide(C)@6; Label:13C(6)15N(2)(K)@12		-0.0539473	1442.65	722.333	1442.71	722.36	2	14	16.5494
4	5.437	5.437	5.437	IPI:IPI00847635.1; IPI:IPI00550991.3	Gene_Symbol=SERPINA3 Isoform 1 of Alpha-1-antichymotrypsin; Gene_Symbol=SERPINA3 cDNA FLJ35730 fis, clone TESTI2003131, highly similar to ALPHA-1-ANTICHYMOTRYPSIN	99	ITLLSALVETR	Label:13C(6)15N(4)(R)@11		-0.0360546	1224.7	613.355	1224.73	613.373	2	14	22.1238
4	2.48	2.48	2.48	IPI:IPI00018953.1	Gene_Symbol=DPP4 Dipeptidyl peptidase 4	99	AGAVNPTVK	Label:13C(6)15N(2)(K)@9		0.00686026	863.503	432.759	863.496	432.755	2	11	6.8423
4	2.48	2.48	2.48	IPI:IPI00018953.1	Gene_Symbol=DPP4 Dipeptidyl peptidase 4	99	VLEDNSALDK	Label:13C(6)15N(2)(K)@10		-0.0439699	1110.52	556.268	1110.56	556.29	2	11	7.9413
4	2.48	2.48	2.48	IPI:IPI00018953.1	Gene_Symbol=DPP4 Dipeptidyl peptidase 4	99	AGAVNPTVK	Label:13C(6)15N(2)(K)@9		0.105615	863.601	432.808	863.496	432.755	2	11	6.8721
4	2.48	2.48	2.48	IPI:IPI00018953.1	Gene_Symbol=DPP4 Dipeptidyl peptidase 4	99	VLEDNSALDK	Label:13C(6)15N(2)(K)@10		-0.0426272	1110.52	556.268	1110.56	556.29	2	15	7.9652
4	2.48	2.48	2.48	IPI:IPI00018953.1	Gene_Symbol=DPP4 Dipeptidyl peptidase 4	0	VLEDNSALDK	Deamidated(N)@5; Label:13C(6)15N(2)(K)@10		-0.0266427	1111.52	556.768	1111.55	556.782	2	9	7.9891
4	4.441	4.441	4.441	IPI:IPI00008787.3	Gene_Symbol=NAGLU Alpha-N-acetylglucosaminidase	99	ALAAKPGLDTYSLGGGGAAR	Label:13C(6)15N(2)(K)@5; Label:13C(6)15N(4)(R)@20		-0.103644	1862.89	932.454	1863	932.506	2	9	12.5125
4	4.441	4.441	4.441	IPI:IPI00008787.3	Gene_Symbol=NAGLU Alpha-N-acetylglucosaminidase	99	YGVSHPDAGAAWR	Label:13C(6)15N(4)(R)@13		-0.0535256	1395.6	698.808	1395.66	698.835	2	12	9.5471
4	4.441	4.441	4.441	IPI:IPI00008787.3	Gene_Symbol=NAGLU Alpha-N-acetylglucosaminidase	99	ALAAKPGLDTYSLGGGGAAR	Label:13C(6)15N(2)(K)@5; Label:13C(6)15N(4)(R)@20		-0.0271807	1862.97	621.997	1863	622.006	3	13	12.3108
4	4.441	4.441	4.441	IPI:IPI00008787.3	Gene_Symbol=NAGLU Alpha-N-acetylglucosaminidase	99	ALAAKPGLDTYSLGGGGAAR	Label:13C(6)15N(2)(K)@5; Label:13C(6)15N(4)(R)@20		-0.062337	1862.93	621.986	1863	622.006	3	17	12.3348
4	4.441	4.441	4.441	IPI:IPI00008787.3	Gene_Symbol=NAGLU Alpha-N-acetylglucosaminidase	99	ALAAKPGLDTYSLGGGGAAR	Label:13C(6)15N(2)(K)@5; Label:13C(6)15N(4)(R)@20		-0.0869208	1862.91	932.462	1863	932.506	2	12	12.4016
4	4.441	4.441	4.441	IPI:IPI00008787.3	Gene_Symbol=NAGLU Alpha-N-acetylglucosaminidase	99	YGVSHPDAGAAWR	Label:13C(6)15N(4)(R)@13		0.00175894	1395.66	466.226	1395.66	466.226	3	15	9.4873
4	4.441	4.441	4.441	IPI:IPI00008787.3	Gene_Symbol=NAGLU Alpha-N-acetylglucosaminidase	99	YGVSHPDAGAAWR	Label:13C(6)15N(4)(R)@13		0.0056957	1395.66	466.228	1395.66	466.226	3	13	9.5111
4	4.441	4.441	4.441	IPI:IPI00008787.3	Gene_Symbol=NAGLU Alpha-N-acetylglucosaminidase	99	YGVSHPDAGAAWR	Label:13C(6)15N(4)(R)@13		-0.0416848	1395.61	698.814	1395.66	698.835	2	11	9.5173
4	1.589	0.574	0.574	IPI:IPI00855777.1; IPI:IPI00479723.4; IPI:IPI00414283.6; IPI:IPI00339228.1; IPI:IPI00339226.1; IPI:IPI00339225.1; IPI:IPI00339224.2; IPI:IPI00339223.1; IPI:IPI00022418.1	Gene_Symbol=FN1 Isoform 14 of Fibronectin; Gene_Symbol=FN1 FN1 protein; Gene_Symbol=FN1 Isoform 9 of Fibronectin; Gene_Symbol=FN1 Isoform 8 of Fibronectin; Gene_Symbol=FN1 Isoform 6 of Fibronectin; Gene_Symbol=FN1 Isoform 5 of Fibronectin; Gene_Symbol=FN1 fibronectin isoform 4 preproprotein; Gene_Symbol=FN1 Isoform 3 of Fibronectin; Gene_Symbol=FN1 Isoform 1 of Fibronectin	99	LGVRPSQGGEAPR	Label:13C(6)15N(4)(R)@4; Label:13C(6)15N(4)(R)@13		0.0404992	1342.76	448.595	1342.72	448.581	3	18	6.8483
4	1.589	0.574	0.574	IPI:IPI00855777.1; IPI:IPI00479723.4; IPI:IPI00414283.6; IPI:IPI00339228.1; IPI:IPI00339226.1; IPI:IPI00339225.1; IPI:IPI00339224.2; IPI:IPI00339223.1; IPI:IPI00022418.1	Gene_Symbol=FN1 Isoform 14 of Fibronectin; Gene_Symbol=FN1 FN1 protein; Gene_Symbol=FN1 Isoform 9 of Fibronectin; Gene_Symbol=FN1 Isoform 8 of Fibronectin; Gene_Symbol=FN1 Isoform 6 of Fibronectin; Gene_Symbol=FN1 Isoform 5 of Fibronectin; Gene_Symbol=FN1 fibronectin isoform 4 preproprotein; Gene_Symbol=FN1 Isoform 3 of Fibronectin; Gene_Symbol=FN1 Isoform 1 of Fibronectin	0	DDKESVPISDTIIPAVPPPTDLR	Label:13C(6)15N(2)(K)@3; Label:13C(6)15N(4)(R)@23		-0.107254	2492.21	831.742	2492.31	831.778	3	12	21.5567
4	1.589	0.574	0.574	IPI:IPI00855777.1; IPI:IPI00479723.4; IPI:IPI00414283.6; IPI:IPI00339228.1; IPI:IPI00339226.1; IPI:IPI00339225.1; IPI:IPI00339224.2; IPI:IPI00339223.1; IPI:IPI00022418.1	Gene_Symbol=FN1 Isoform 14 of Fibronectin; Gene_Symbol=FN1 FN1 protein; Gene_Symbol=FN1 Isoform 9 of Fibronectin; Gene_Symbol=FN1 Isoform 8 of Fibronectin; Gene_Symbol=FN1 Isoform 6 of Fibronectin; Gene_Symbol=FN1 Isoform 5 of Fibronectin; Gene_Symbol=FN1 fibronectin isoform 4 preproprotein; Gene_Symbol=FN1 Isoform 3 of Fibronectin; Gene_Symbol=FN1 Isoform 1 of Fibronectin	99	LGVRPSQGGEAPR	Label:13C(6)15N(4)(R)@4; Label:13C(6)15N(4)(R)@13		0.093966	1342.82	448.613	1342.72	448.581	3	16	6.8782
4	1.589	0.574	0.574	IPI:IPI00855777.1; IPI:IPI00479723.4; IPI:IPI00414283.6; IPI:IPI00339228.1; IPI:IPI00339226.1; IPI:IPI00339225.1; IPI:IPI00339224.2; IPI:IPI00339223.1; IPI:IPI00022418.1	Gene_Symbol=FN1 Isoform 14 of Fibronectin; Gene_Symbol=FN1 FN1 protein; Gene_Symbol=FN1 Isoform 9 of Fibronectin; Gene_Symbol=FN1 Isoform 8 of Fibronectin; Gene_Symbol=FN1 Isoform 6 of Fibronectin; Gene_Symbol=FN1 Isoform 5 of Fibronectin; Gene_Symbol=FN1 fibronectin isoform 4 preproprotein; Gene_Symbol=FN1 Isoform 3 of Fibronectin; Gene_Symbol=FN1 Isoform 1 of Fibronectin	0	LGVRPSQGGEAPR	Label:13C(6)15N(4)(R)@4; Label:13C(6)15N(4)(R)@13		-0.0354152	1342.69	672.351	1342.72	672.368	2	6	6.908
4	1.589	0.574	0.574	IPI:IPI00855777.1; IPI:IPI00479723.4; IPI:IPI00414283.6; IPI:IPI00339228.1; IPI:IPI00339226.1; IPI:IPI00339225.1; IPI:IPI00339224.2; IPI:IPI00339223.1; IPI:IPI00022418.1	Gene_Symbol=FN1 Isoform 14 of Fibronectin; Gene_Symbol=FN1 FN1 protein; Gene_Symbol=FN1 Isoform 9 of Fibronectin; Gene_Symbol=FN1 Isoform 8 of Fibronectin; Gene_Symbol=FN1 Isoform 6 of Fibronectin; Gene_Symbol=FN1 Isoform 5 of Fibronectin; Gene_Symbol=FN1 fibronectin isoform 4 preproprotein; Gene_Symbol=FN1 Isoform 3 of Fibronectin; Gene_Symbol=FN1 Isoform 1 of Fibronectin	0	LGVRPSQGGEAPR	Label:13C(6)15N(4)(R)@4; Label:13C(6)15N(4)(R)@13		-0.06459	1342.66	672.336	1342.72	672.368	2	7	6.9379
4	2.899	2.899	2.899	IPI:IPI00908762.2; IPI:IPI00902654.2; IPI:IPI00023673.1	Gene_Symbol=LGALS3BP cDNA FLJ53509, highly similar to Galectin-3-binding protein; Gene_Symbol=LGALS3BP cDNA FLJ54583, highly similar to Galectin-3-binding protein; Gene_Symbol=LGALS3BP Galectin-3-binding protein	99	ASHEEVEGLVEK			0.26797	1325.91	663.964	1325.65	663.83	2	13	8.483
4	2.899	2.899	2.899	IPI:IPI00908762.2; IPI:IPI00902654.2; IPI:IPI00023673.1	Gene_Symbol=LGALS3BP cDNA FLJ53509, highly similar to Galectin-3-binding protein; Gene_Symbol=LGALS3BP cDNA FLJ54583, highly similar to Galectin-3-binding protein; Gene_Symbol=LGALS3BP Galectin-3-binding protein	99	ASHEEVEGLVEK	Label:13C(6)15N(2)(K)@12		-0.0678839	1333.59	667.804	1333.66	667.838	2	14	7.3109
4	2.899	2.899	2.899	IPI:IPI00908762.2; IPI:IPI00902654.2; IPI:IPI00023673.1	Gene_Symbol=LGALS3BP cDNA FLJ53509, highly similar to Galectin-3-binding protein; Gene_Symbol=LGALS3BP cDNA FLJ54583, highly similar to Galectin-3-binding protein; Gene_Symbol=LGALS3BP Galectin-3-binding protein	99	ASHEEVEGLVEK	Label:13C(6)15N(2)(K)@12		-0.0644659	1333.6	667.805	1333.66	667.838	2	12	7.3499
4	2.899	2.899	2.899	IPI:IPI00908762.2; IPI:IPI00902654.2; IPI:IPI00023673.1	Gene_Symbol=LGALS3BP cDNA FLJ53509, highly similar to Galectin-3-binding protein; Gene_Symbol=LGALS3BP cDNA FLJ54583, highly similar to Galectin-3-binding protein; Gene_Symbol=LGALS3BP Galectin-3-binding protein	99	ASHEEVEGLVEK	Label:13C(6)15N(2)(K)@12		-0.0248674	1333.64	445.553	1333.66	445.561	3	16	8.3991
4	2.899	2.899	2.899	IPI:IPI00908762.2; IPI:IPI00902654.2; IPI:IPI00023673.1	Gene_Symbol=LGALS3BP cDNA FLJ53509, highly similar to Galectin-3-binding protein; Gene_Symbol=LGALS3BP cDNA FLJ54583, highly similar to Galectin-3-binding protein; Gene_Symbol=LGALS3BP Galectin-3-binding protein	99	ASHEEVEGLVEK	Label:13C(6)15N(2)(K)@12		-0.0426153	1333.62	667.816	1333.66	667.838	2	14	8.4052
4	2.899	2.899	2.899	IPI:IPI00908762.2; IPI:IPI00902654.2; IPI:IPI00023673.1	Gene_Symbol=LGALS3BP cDNA FLJ53509, highly similar to Galectin-3-binding protein; Gene_Symbol=LGALS3BP cDNA FLJ54583, highly similar to Galectin-3-binding protein; Gene_Symbol=LGALS3BP Galectin-3-binding protein	99	ASHEEVEGLVEK	Label:13C(6)15N(2)(K)@12		0.0183455	1333.68	445.567	1333.66	445.561	3	15	8.435
4	2.899	2.899	2.899	IPI:IPI00908762.2; IPI:IPI00902654.2; IPI:IPI00023673.1	Gene_Symbol=LGALS3BP cDNA FLJ53509, highly similar to Galectin-3-binding protein; Gene_Symbol=LGALS3BP cDNA FLJ54583, highly similar to Galectin-3-binding protein; Gene_Symbol=LGALS3BP Galectin-3-binding protein	99	ASHEEVEGLVEK	Label:13C(6)15N(2)(K)@12		-0.0660528	1333.59	667.804	1333.66	667.838	2	14	8.441
5	11.03	7.829	7.829	IPI:IPI00431645.1	Gene_Symbol=HP HP protein	99	SCAVAEYGVYVK	Propionamide(C)@2		0.51598	1359.17	680.592	1358.65	680.334	2	13	14.0183
5	11.03	7.829	7.829	IPI:IPI00431645.1	Gene_Symbol=HP HP protein	99	VTSIQDWVQK	Label:13C(6)15N(2)(K)@10		-0.0633187	1210.58	606.298	1210.64	606.329	2	11	13.4213
5	11.03	7.829	7.829	IPI:IPI00431645.1	Gene_Symbol=HP HP protein	99	SCAVAEYGVYVK	Propionamide(C)@2; Label:13C(6)15N(2)(K)@12		-0.0702407	1366.6	684.306	1366.67	684.341	2	14	13.9274
5	11.03	7.829	7.829	IPI:IPI00431645.1	Gene_Symbol=HP HP protein	99	SCAVAEYGVYVK	Propionamide(C)@2; Label:13C(6)15N(2)(K)@12		-0.070729	1366.6	684.306	1366.67	684.341	2	13	13.9513
5	11.03	7.829	7.829	IPI:IPI00431645.1	Gene_Symbol=HP HP protein	99	SCAVAEYGVYVK	Propionamide(C)@2; Label:13C(6)15N(2)(K)@12		-0.0121791	1366.66	456.559	1366.67	456.563	3	13	13.9813
5	11.03	7.829	7.829	IPI:IPI00431645.1	Gene_Symbol=HP HP protein	99	SCAVAEYGVYVK	Propionamide(C)@2		1.16686	1359.82	680.918	1358.65	680.334	2	11	14.0582
5	11.03	7.829	7.829	IPI:IPI00431645.1	Gene_Symbol=HP HP protein	99	SCAVAEYGVYVK	Propionamide(C)@2; Label:13C(6)15N(2)(K)@12		-0.0661952	1366.6	456.541	1366.67	456.563	3	14	14.1256
5	11.03	7.829	7.829	IPI:IPI00431645.1	Gene_Symbol=HP HP protein	3.66	SCAVAEYGVYVK	Propionamide(C)@2; Label:13C(6)15N(2)(K)@12		0.911449	1367.58	684.797	1366.67	684.341	2	8	15.4288
5	11.03	7.829	7.829	IPI:IPI00431645.1	Gene_Symbol=HP HP protein	3.635	SCAVAEYGVYVK	Propionamide(C)@2; Label:13C(6)15N(2)(K)@12		0.914867	1367.58	684.799	1366.67	684.341	2	7	15.3875
5	11.03	7.829	7.829	IPI:IPI00431645.1	Gene_Symbol=HP HP protein	99	VTSIQDWVQK	Label:13C(6)15N(2)(K)@10		-0.0557503	1210.59	606.301	1210.64	606.329	2	11	13.4649
5	11.03	7.829	7.829	IPI:IPI00431645.1	Gene_Symbol=HP HP protein	99	VTSIQDWVQK	Label:13C(6)15N(2)(K)@10		-0.0458626	1210.6	606.306	1210.64	606.329	2	12	15.7888
5	11.03	7.829	7.829	IPI:IPI00431645.1	Gene_Symbol=HP HP protein	99	VTSIQDWVQK	Label:13C(6)15N(2)(K)@10		-0.0551399	1210.59	606.302	1210.64	606.329	2	12	15.8127
5	2.696	2.696	2.696	IPI:IPI00909283.1; IPI:IPI00304227.4; IPI:IPI00293539.4	Gene_Symbol=CDH11 cDNA FLJ58514, highly similar to Cadherin-11; Gene_Symbol=CDH11 Isoform 1 of Cadherin-11; Gene_Symbol=CDH11 Isoform 2 of Cadherin-11	99	DPDAANSPIR			0.371735	1054.88	528.445	1054.5	528.259	2	14	7.916
5	2.696	2.696	2.696	IPI:IPI00909283.1; IPI:IPI00304227.4; IPI:IPI00293539.4	Gene_Symbol=CDH11 cDNA FLJ58514, highly similar to Cadherin-11; Gene_Symbol=CDH11 Isoform 1 of Cadherin-11; Gene_Symbol=CDH11 Isoform 2 of Cadherin-11	99	VEAANVHIDPK	Label:13C(6)15N(2)(K)@11		-0.0686995	1199.57	600.792	1199.64	600.827	2	12	7.6981
5	2.696	2.696	2.696	IPI:IPI00909283.1; IPI:IPI00304227.4; IPI:IPI00293539.4	Gene_Symbol=CDH11 cDNA FLJ58514, highly similar to Cadherin-11; Gene_Symbol=CDH11 Isoform 1 of Cadherin-11; Gene_Symbol=CDH11 Isoform 2 of Cadherin-11	99	DPDAANSPIR	Label:13C(6)15N(4)(R)@10		-0.0359478	1064.48	533.246	1064.51	533.264	2	11	8.3333
5	2.696	2.696	2.696	IPI:IPI00909283.1; IPI:IPI00304227.4; IPI:IPI00293539.4	Gene_Symbol=CDH11 cDNA FLJ58514, highly similar to Cadherin-11; Gene_Symbol=CDH11 Isoform 1 of Cadherin-11; Gene_Symbol=CDH11 Isoform 2 of Cadherin-11	99	DPDAANSPIR	Deamidated(N)@6; Label:13C(6)15N(4)(R)@10		-0.0171558	1065.48	533.747	1065.5	533.756	2	14	8.4181
5	2.696	2.696	2.696	IPI:IPI00909283.1; IPI:IPI00304227.4; IPI:IPI00293539.4	Gene_Symbol=CDH11 cDNA FLJ58514, highly similar to Cadherin-11; Gene_Symbol=CDH11 Isoform 1 of Cadherin-11; Gene_Symbol=CDH11 Isoform 2 of Cadherin-11	99	VEAANVHIDPK	Label:13C(6)15N(2)(K)@11		0.0818304	1199.72	400.914	1199.64	400.887	3	10	7.6921
5	2.696	2.696	2.696	IPI:IPI00909283.1; IPI:IPI00304227.4; IPI:IPI00293539.4	Gene_Symbol=CDH11 cDNA FLJ58514, highly similar to Cadherin-11; Gene_Symbol=CDH11 Isoform 1 of Cadherin-11; Gene_Symbol=CDH11 Isoform 2 of Cadherin-11	99	VEAANVHIDPK	Label:13C(6)15N(2)(K)@11		-0.0479475	1199.59	600.803	1199.64	600.827	2	17	7.722
5	2.696	2.696	2.696	IPI:IPI00909283.1; IPI:IPI00304227.4; IPI:IPI00293539.4	Gene_Symbol=CDH11 cDNA FLJ58514, highly similar to Cadherin-11; Gene_Symbol=CDH11 Isoform 1 of Cadherin-11; Gene_Symbol=CDH11 Isoform 2 of Cadherin-11	3.937	VEAANVHIDPK	Label:13C(6)15N(2)(K)@11		-0.0327936	1199.61	400.876	1199.64	400.887	3	10	7.6683
5	9.483	3.161	3.161	IPI:IPI00968182.1; IPI:IPI00968027.1; IPI:IPI00965085.1; IPI:IPI00555812.4	Gene_Symbol=GC 39 kDa protein; Gene_Symbol=GC 55 kDa protein; Gene_Symbol=GC 53 kDa protein; Gene_Symbol=GC Isoform 1 of Vitamin D-binding protein	99	HLSLLTTLSNR	Label:13C(6)15N(4)(R)@11		0.8747	1264.59	422.538	1263.72	422.246	3	13	15.8874
5	9.483	3.161	3.161	IPI:IPI00968182.1; IPI:IPI00968027.1; IPI:IPI00965085.1; IPI:IPI00555812.4	Gene_Symbol=GC 39 kDa protein; Gene_Symbol=GC 55 kDa protein; Gene_Symbol=GC 53 kDa protein; Gene_Symbol=GC Isoform 1 of Vitamin D-binding protein	3.661	EVVSLTEACCAEGADPDCYDTR	Propionamide(C)@9; Propionamide(C)@10; Propionamide(C)@18; Label:13C(6)15N(4)(R)@22		-0.127345	2568.94	857.32	2569.06	857.362	3	11	15.514
5	9.483	3.161	3.161	IPI:IPI00968182.1; IPI:IPI00968027.1; IPI:IPI00965085.1; IPI:IPI00555812.4	Gene_Symbol=GC 39 kDa protein; Gene_Symbol=GC 55 kDa protein; Gene_Symbol=GC 53 kDa protein; Gene_Symbol=GC Isoform 1 of Vitamin D-binding protein	3.649	EVVSLTEACCAEGADPDCYDTR	Propionamide(C)@9; Propionamide(C)@10; Propionamide(C)@18; Label:13C(6)15N(4)(R)@22		-0.0544695	2569.01	857.344	2569.06	857.362	3	11	15.036
5	9.483	3.161	3.161	IPI:IPI00968182.1; IPI:IPI00968027.1; IPI:IPI00965085.1; IPI:IPI00555812.4	Gene_Symbol=GC 39 kDa protein; Gene_Symbol=GC 55 kDa protein; Gene_Symbol=GC 53 kDa protein; Gene_Symbol=GC Isoform 1 of Vitamin D-binding protein	99	HLSLLTTLSNR	Label:13C(6)15N(4)(R)@11		0.947576	1264.67	422.562	1263.72	422.246	3	11	15.8447
5	9.483	3.161	3.161	IPI:IPI00968182.1; IPI:IPI00968027.1; IPI:IPI00965085.1; IPI:IPI00555812.4	Gene_Symbol=GC 39 kDa protein; Gene_Symbol=GC 55 kDa protein; Gene_Symbol=GC 53 kDa protein; Gene_Symbol=GC Isoform 1 of Vitamin D-binding protein	99	HLSLLTTLSNR	Label:13C(6)15N(4)(R)@11		-0.0819822	1263.64	632.825	1263.72	632.866	2	11	15.8813
5	9.483	3.161	3.161	IPI:IPI00968182.1; IPI:IPI00968027.1; IPI:IPI00965085.1; IPI:IPI00555812.4	Gene_Symbol=GC 39 kDa protein; Gene_Symbol=GC 55 kDa protein; Gene_Symbol=GC 53 kDa protein; Gene_Symbol=GC Isoform 1 of Vitamin D-binding protein	99	HLSLLTTLSNR	Label:13C(6)15N(4)(R)@11		-0.072949	1263.64	632.83	1263.72	632.866	2	15	15.9111
5	8.499	4.249	4.249	IPI:IPI00945650.1; IPI:IPI00396434.1; IPI:IPI00289983.3	Gene_Symbol=ACPP cDNA FLJ54158, highly similar to Prostatic acid phosphatase; Gene_Symbol=ACPP Isoform 1 of Prostatic acid phosphatase; Gene_Symbol=ACPP Isoform 2 of Prostatic acid phosphatase	99	LSGLHGQDLFGIWSK	Label:13C(6)15N(2)(K)@15		-0.061553	1664.82	833.415	1664.88	833.446	2	14	22.102
5	8.499	4.249	4.249	IPI:IPI00945650.1; IPI:IPI00396434.1; IPI:IPI00289983.3	Gene_Symbol=ACPP cDNA FLJ54158, highly similar to Prostatic acid phosphatase; Gene_Symbol=ACPP Isoform 1 of Prostatic acid phosphatase; Gene_Symbol=ACPP Isoform 2 of Prostatic acid phosphatase	3.844	ELSELSLLSLYGIHK	Label:13C(6)15N(2)(K)@15		-0.062041	1708.89	570.636	1708.95	570.657	3	11	22.1141
5	8.499	4.249	4.249	IPI:IPI00945650.1; IPI:IPI00396434.1; IPI:IPI00289983.3	Gene_Symbol=ACPP cDNA FLJ54158, highly similar to Prostatic acid phosphatase; Gene_Symbol=ACPP Isoform 1 of Prostatic acid phosphatase; Gene_Symbol=ACPP Isoform 2 of Prostatic acid phosphatase	0	ELSELSLLSLYGIHK	Label:13C(6)15N(2)(K)@15		-0.0970619	1708.85	855.433	1708.95	855.482	2	6	22.1762
5	8.499	4.249	4.249	IPI:IPI00945650.1; IPI:IPI00396434.1; IPI:IPI00289983.3	Gene_Symbol=ACPP cDNA FLJ54158, highly similar to Prostatic acid phosphatase; Gene_Symbol=ACPP Isoform 1 of Prostatic acid phosphatase; Gene_Symbol=ACPP Isoform 2 of Prostatic acid phosphatase	99	LSGLHGQDLFGIWSK	Label:13C(6)15N(2)(K)@15		-0.0522279	1664.82	555.949	1664.88	555.966	3	16	22.0782
5	8.499	4.249	4.249	IPI:IPI00945650.1; IPI:IPI00396434.1; IPI:IPI00289983.3	Gene_Symbol=ACPP cDNA FLJ54158, highly similar to Prostatic acid phosphatase; Gene_Symbol=ACPP Isoform 1 of Prostatic acid phosphatase; Gene_Symbol=ACPP Isoform 2 of Prostatic acid phosphatase	3.833	LSGLHGQDLFGIWSK	Label:13C(6)15N(2)(K)@15		-0.0959768	1664.78	833.398	1664.88	833.446	2	8	22.1693
5	1.262	1.262	1.262	IPI:IPI00940485.1; IPI:IPI00939169.1; IPI:IPI00218460.7; IPI:IPI00162735.3; IPI:IPI00027235.1	Gene_Symbol=ATRN Putative uncharacterized protein ATRN; Gene_Symbol=ATRN Isoform 3 of Attractin; Gene_Symbol=ATRN Putative uncharacterized protein ATRN; Gene_Symbol=ATRN Isoform 2 of Attractin; Gene_Symbol=ATRN Isoform 1 of Attractin	99	EQYAVVGHSAHIVTLK	Label:13C(6)15N(2)(K)@16		0.0264243	1758.98	440.752	1758.95	440.745	4	14	10.9646
5	1.262	1.262	1.262	IPI:IPI00940485.1; IPI:IPI00939169.1; IPI:IPI00218460.7; IPI:IPI00162735.3; IPI:IPI00027235.1	Gene_Symbol=ATRN Putative uncharacterized protein ATRN; Gene_Symbol=ATRN Isoform 3 of Attractin; Gene_Symbol=ATRN Putative uncharacterized protein ATRN; Gene_Symbol=ATRN Isoform 2 of Attractin; Gene_Symbol=ATRN Isoform 1 of Attractin	0	EQYAVVGHSAHIVTLK	Label:13C(6)15N(2)(K)@16		0.0032309	1758.95	440.746	1758.95	440.745	4	7	11.098
5	0.898	0.898	0.898	IPI:IPI00924951.1; IPI:IPI00024292.2	Gene_Symbol=LRP2 cDNA FLJ61253, highly similar to Low-density lipoprotein receptor-related protein 2; Gene_Symbol=LRP2 Low-density lipoprotein receptor-related protein 2	99	IEHSTFDGLDR	Label:13C(6)15N(4)(R)@11		0.000284781	1298.61	433.878	1298.61	433.878	3	12	9.9322
5	1.261	1.261	1.261	IPI:IPI00883772.1; IPI:IPI00293088.6	Gene_Symbol=GAA lysosomal alpha-glucosidase preproprotein; Gene_Symbol=GAA Lysosomal alpha-glucosidase	99	VTSEGAGLQLQK	Label:13C(6)15N(2)(K)@12		-0.0555521	1237.62	619.817	1237.68	619.845	2	16	9.5721
5	1.261	1.261	1.261	IPI:IPI00883772.1; IPI:IPI00293088.6	Gene_Symbol=GAA lysosomal alpha-glucosidase preproprotein; Gene_Symbol=GAA Lysosomal alpha-glucosidase	99	VTSEGAGLQLQK	Label:13C(6)15N(2)(K)@12		-0.0512797	1237.62	619.819	1237.68	619.845	2	16	9.5473
5	1.733	1.733	1.733	IPI:IPI00247063.3	Gene_Symbol=MME Neprilysin	99	IGYPDDIVSNDNK	Label:13C(6)15N(2)(K)@13		-0.0226551	1456.67	486.564	1456.69	486.571	3	10	12.5911
5	1.733	1.733	1.733	IPI:IPI00247063.3	Gene_Symbol=MME Neprilysin	99	IGYPDDIVSNDNK	Label:13C(6)15N(2)(K)@13		-0.0856301	1456.61	729.311	1456.69	729.354	2	12	12.0827
5	1.733	1.733	1.733	IPI:IPI00247063.3	Gene_Symbol=MME Neprilysin	99	IGYPDDIVSNDNK	Label:13C(6)15N(2)(K)@13		-0.0754982	1456.62	729.316	1456.69	729.354	2	12	12.1067
5	1.733	1.733	1.733	IPI:IPI00247063.3	Gene_Symbol=MME Neprilysin	99	IGYPDDIVSNDNK	Label:13C(6)15N(2)(K)@13		-0.0922352	1456.6	486.541	1456.69	486.571	3	12	12.5548
5	1.733	1.733	1.733	IPI:IPI00247063.3	Gene_Symbol=MME Neprilysin	99	IGYPDDIVSNDNK			0.482768	1449.16	725.588	1448.68	725.346	2	11	12.585
5	1.733	1.733	1.733	IPI:IPI00247063.3	Gene_Symbol=MME Neprilysin	99	IGYPDDIVSNDNK			0.471538	1449.15	725.582	1448.68	725.346	2	13	12.6602
5	1.733	1.733	1.733	IPI:IPI00247063.3	Gene_Symbol=MME Neprilysin	99	IGYPDDIVSNDNK	Deamidated(N)@10; Label:13C(6)15N(2)(K)@13		-0.0802658	1457.6	729.805	1457.68	729.846	2	14	13.1013
5	1.733	1.733	1.733	IPI:IPI00247063.3	Gene_Symbol=MME Neprilysin	99	IGYPDDIVSNDNK	Deamidated(N)@10; Label:13C(6)15N(2)(K)@13		-0.0739181	1457.6	729.809	1457.68	729.846	2	14	13.1252
6	4.791	4.791	4.791	IPI:IPI00927191.1; IPI:IPI00796919.2; IPI:IPI00441550.4; IPI:IPI00441344.2	Gene_Symbol=GLB1 beta-galactosidase isoform b; Gene_Symbol=GLB1 Beta-galactosidase; Gene_Symbol=GLB1 Isoform 2 of Beta-galactosidase; Gene_Symbol=GLB1 Isoform 1 of Beta-galactosidase	99	AYVAVDGIPQGVLER			-0.871213	1584.98	793.495	1585.85	793.93	2	10	19.2941
6	4.791	4.791	4.791	IPI:IPI00927191.1; IPI:IPI00796919.2; IPI:IPI00441550.4; IPI:IPI00441344.2	Gene_Symbol=GLB1 beta-galactosidase isoform b; Gene_Symbol=GLB1 Beta-galactosidase; Gene_Symbol=GLB1 Isoform 2 of Beta-galactosidase; Gene_Symbol=GLB1 Isoform 1 of Beta-galactosidase	99	TVGAALDILCPSGPIK	Propionamide(C)@10; Label:13C(6)15N(2)(K)@16		-0.107574	1632.79	817.404	1632.9	817.457	2	13	22.1041
6	4.791	4.791	4.791	IPI:IPI00927191.1; IPI:IPI00796919.2; IPI:IPI00441550.4; IPI:IPI00441344.2	Gene_Symbol=GLB1 beta-galactosidase isoform b; Gene_Symbol=GLB1 Beta-galactosidase; Gene_Symbol=GLB1 Isoform 2 of Beta-galactosidase; Gene_Symbol=GLB1 Isoform 1 of Beta-galactosidase	99	AYVAVDGIPQGVLER	Label:13C(6)15N(4)(R)@15		-0.0776024	1595.78	798.896	1595.85	798.935	2	13	19.095
6	4.791	4.791	4.791	IPI:IPI00927191.1; IPI:IPI00796919.2; IPI:IPI00441550.4; IPI:IPI00441344.2	Gene_Symbol=GLB1 beta-galactosidase isoform b; Gene_Symbol=GLB1 Beta-galactosidase; Gene_Symbol=GLB1 Isoform 2 of Beta-galactosidase; Gene_Symbol=GLB1 Isoform 1 of Beta-galactosidase	99	AYVAVDGIPQGVLER	Label:13C(6)15N(4)(R)@15		-0.0896873	1595.77	798.89	1595.85	798.935	2	12	19.1188
6	4.791	4.791	4.791	IPI:IPI00927191.1; IPI:IPI00796919.2; IPI:IPI00441550.4; IPI:IPI00441344.2	Gene_Symbol=GLB1 beta-galactosidase isoform b; Gene_Symbol=GLB1 Beta-galactosidase; Gene_Symbol=GLB1 Isoform 2 of Beta-galactosidase; Gene_Symbol=GLB1 Isoform 1 of Beta-galactosidase	99	AYVAVDGIPQGVLER	Label:13C(6)15N(4)(R)@15		-0.0819492	1595.77	532.932	1595.85	532.959	3	14	19.185
6	4.791	4.791	4.791	IPI:IPI00927191.1; IPI:IPI00796919.2; IPI:IPI00441550.4; IPI:IPI00441344.2	Gene_Symbol=GLB1 beta-galactosidase isoform b; Gene_Symbol=GLB1 Beta-galactosidase; Gene_Symbol=GLB1 Isoform 2 of Beta-galactosidase; Gene_Symbol=GLB1 Isoform 1 of Beta-galactosidase	99	AYVAVDGIPQGVLER	Label:13C(6)15N(4)(R)@15		-0.0823154	1595.77	532.931	1595.85	532.959	3	13	19.155
6	4.791	4.791	4.791	IPI:IPI00927191.1; IPI:IPI00796919.2; IPI:IPI00441550.4; IPI:IPI00441344.2	Gene_Symbol=GLB1 beta-galactosidase isoform b; Gene_Symbol=GLB1 Beta-galactosidase; Gene_Symbol=GLB1 Isoform 2 of Beta-galactosidase; Gene_Symbol=GLB1 Isoform 1 of Beta-galactosidase	99	TVGAALDILCPSGPIK	Propionamide(C)@10; Label:13C(6)15N(2)(K)@16		-0.0809622	1632.82	817.417	1632.9	817.457	2	15	22.0803
6	6.128	6.128	6.128	IPI:IPI00909135.1; IPI:IPI00884085.1; IPI:IPI00550854.2; IPI:IPI00153049.3	Gene_Symbol=MXRA8 cDNA FLJ52846, highly similar to Homo sapiens matrix-remodelling associated 8 (MXRA8), mRNA; Gene_Symbol=MXRA8 cDNA FLJ38647 fis, clone HHDPC2006862, highly similar to Homo sapiens matrix-remodelling associated 8 (MXRA8), mRNA; Gene_Symbol=MXRA8 Isoform 1 of Matrix-remodeling-associated protein 8; Gene_Symbol=MXRA8 Isoform 2 of Matrix-remodeling-associated protein 8	99	GAPALLTCVNR	Propionamide(C)@8		0.298037	1184.93	593.473	1184.63	593.324	2	12	14.3337
6	6.128	6.128	6.128	IPI:IPI00909135.1; IPI:IPI00884085.1; IPI:IPI00550854.2; IPI:IPI00153049.3	Gene_Symbol=MXRA8 cDNA FLJ52846, highly similar to Homo sapiens matrix-remodelling associated 8 (MXRA8), mRNA; Gene_Symbol=MXRA8 cDNA FLJ38647 fis, clone HHDPC2006862, highly similar to Homo sapiens matrix-remodelling associated 8 (MXRA8), mRNA; Gene_Symbol=MXRA8 Isoform 1 of Matrix-remodeling-associated protein 8; Gene_Symbol=MXRA8 Isoform 2 of Matrix-remodeling-associated protein 8	99	LLDLYSAGEQR	Label:13C(6)15N(4)(R)@11		-0.0665648	1273.59	637.801	1273.65	637.834	2	12	14.5817
6	6.128	6.128	6.128	IPI:IPI00909135.1; IPI:IPI00884085.1; IPI:IPI00550854.2; IPI:IPI00153049.3	Gene_Symbol=MXRA8 cDNA FLJ52846, highly similar to Homo sapiens matrix-remodelling associated 8 (MXRA8), mRNA; Gene_Symbol=MXRA8 cDNA FLJ38647 fis, clone HHDPC2006862, highly similar to Homo sapiens matrix-remodelling associated 8 (MXRA8), mRNA; Gene_Symbol=MXRA8 Isoform 1 of Matrix-remodeling-associated protein 8; Gene_Symbol=MXRA8 Isoform 2 of Matrix-remodeling-associated protein 8	99	GAPALLTCVNR	Propionamide(C)@8; Label:13C(6)15N(4)(R)@11		-0.0589867	1194.58	598.299	1194.64	598.328	2	13	14.1507
6	6.128	6.128	6.128	IPI:IPI00909135.1; IPI:IPI00884085.1; IPI:IPI00550854.2; IPI:IPI00153049.3	Gene_Symbol=MXRA8 cDNA FLJ52846, highly similar to Homo sapiens matrix-remodelling associated 8 (MXRA8), mRNA; Gene_Symbol=MXRA8 cDNA FLJ38647 fis, clone HHDPC2006862, highly similar to Homo sapiens matrix-remodelling associated 8 (MXRA8), mRNA; Gene_Symbol=MXRA8 Isoform 1 of Matrix-remodeling-associated protein 8; Gene_Symbol=MXRA8 Isoform 2 of Matrix-remodeling-associated protein 8	99	GAPALLTCVNR	Propionamide(C)@8; Label:13C(6)15N(4)(R)@11		0.105198	1194.75	598.381	1194.64	598.328	2	11	14.1806
6	6.128	6.128	6.128	IPI:IPI00909135.1; IPI:IPI00884085.1; IPI:IPI00550854.2; IPI:IPI00153049.3	Gene_Symbol=MXRA8 cDNA FLJ52846, highly similar to Homo sapiens matrix-remodelling associated 8 (MXRA8), mRNA; Gene_Symbol=MXRA8 cDNA FLJ38647 fis, clone HHDPC2006862, highly similar to Homo sapiens matrix-remodelling associated 8 (MXRA8), mRNA; Gene_Symbol=MXRA8 Isoform 1 of Matrix-remodeling-associated protein 8; Gene_Symbol=MXRA8 Isoform 2 of Matrix-remodeling-associated protein 8	99	GAPALLTCVNR	Propionamide(C)@8		1.3559	1185.99	594.002	1184.63	593.324	2	12	14.1927
6	6.128	6.128	6.128	IPI:IPI00909135.1; IPI:IPI00884085.1; IPI:IPI00550854.2; IPI:IPI00153049.3	Gene_Symbol=MXRA8 cDNA FLJ52846, highly similar to Homo sapiens matrix-remodelling associated 8 (MXRA8), mRNA; Gene_Symbol=MXRA8 cDNA FLJ38647 fis, clone HHDPC2006862, highly similar to Homo sapiens matrix-remodelling associated 8 (MXRA8), mRNA; Gene_Symbol=MXRA8 Isoform 1 of Matrix-remodeling-associated protein 8; Gene_Symbol=MXRA8 Isoform 2 of Matrix-remodeling-associated protein 8	99	GAPALLTCVNR	Propionamide(C)@8; Deamidated(N)@10; Label:13C(6)15N(4)(R)@11		-0.0649749	1195.56	598.788	1195.63	598.82	2	13	15.4554
6	6.128	6.128	6.128	IPI:IPI00909135.1; IPI:IPI00884085.1; IPI:IPI00550854.2; IPI:IPI00153049.3	Gene_Symbol=MXRA8 cDNA FLJ52846, highly similar to Homo sapiens matrix-remodelling associated 8 (MXRA8), mRNA; Gene_Symbol=MXRA8 cDNA FLJ38647 fis, clone HHDPC2006862, highly similar to Homo sapiens matrix-remodelling associated 8 (MXRA8), mRNA; Gene_Symbol=MXRA8 Isoform 1 of Matrix-remodeling-associated protein 8; Gene_Symbol=MXRA8 Isoform 2 of Matrix-remodeling-associated protein 8	99	GAPALLTCVNR	Propionamide(C)@8; Deamidated(N)@10; Label:13C(6)15N(4)(R)@11		-0.0660736	1195.56	598.787	1195.63	598.82	2	15	15.4795
6	6.128	6.128	6.128	IPI:IPI00909135.1; IPI:IPI00884085.1; IPI:IPI00550854.2; IPI:IPI00153049.3	Gene_Symbol=MXRA8 cDNA FLJ52846, highly similar to Homo sapiens matrix-remodelling associated 8 (MXRA8), mRNA; Gene_Symbol=MXRA8 cDNA FLJ38647 fis, clone HHDPC2006862, highly similar to Homo sapiens matrix-remodelling associated 8 (MXRA8), mRNA; Gene_Symbol=MXRA8 Isoform 1 of Matrix-remodeling-associated protein 8; Gene_Symbol=MXRA8 Isoform 2 of Matrix-remodeling-associated protein 8	99	LLDLYSAGEQR	Label:13C(6)15N(4)(R)@11		-0.0547239	1273.6	637.807	1273.65	637.834	2	14	15.8225
6	6.128	6.128	6.128	IPI:IPI00909135.1; IPI:IPI00884085.1; IPI:IPI00550854.2; IPI:IPI00153049.3	Gene_Symbol=MXRA8 cDNA FLJ52846, highly similar to Homo sapiens matrix-remodelling associated 8 (MXRA8), mRNA; Gene_Symbol=MXRA8 cDNA FLJ38647 fis, clone HHDPC2006862, highly similar to Homo sapiens matrix-remodelling associated 8 (MXRA8), mRNA; Gene_Symbol=MXRA8 Isoform 1 of Matrix-remodeling-associated protein 8; Gene_Symbol=MXRA8 Isoform 2 of Matrix-remodeling-associated protein 8	99	LLDLYSAGEQR	Label:13C(6)15N(4)(R)@11		-0.0594847	1273.59	637.805	1273.65	637.834	2	15	15.8463
6	6.128	6.128	6.128	IPI:IPI00909135.1; IPI:IPI00884085.1; IPI:IPI00550854.2; IPI:IPI00153049.3	Gene_Symbol=MXRA8 cDNA FLJ52846, highly similar to Homo sapiens matrix-remodelling associated 8 (MXRA8), mRNA; Gene_Symbol=MXRA8 cDNA FLJ38647 fis, clone HHDPC2006862, highly similar to Homo sapiens matrix-remodelling associated 8 (MXRA8), mRNA; Gene_Symbol=MXRA8 Isoform 1 of Matrix-remodeling-associated protein 8; Gene_Symbol=MXRA8 Isoform 2 of Matrix-remodeling-associated protein 8	99	LLDLYSAGEQR	Label:13C(6)15N(4)(R)@11		-0.0555784	1273.6	637.807	1273.65	637.834	2	11	14.5505
6	16.06	16.06	16.06	IPI:IPI00871597.1; IPI:IPI00306378.5; IPI:IPI00294713.4	Gene_Symbol=MASP2 21 kDa protein; Gene_Symbol=MASP2 Isoform 2 of Mannan-binding lectin serine protease 2; Gene_Symbol=MASP2 Isoform 1 of Mannan-binding lectin serine protease 2	99	LASPGFPGEYANDQER	Label:13C(6)15N(4)(R)@16		-0.110397	1759.69	880.854	1759.8	880.909	2	11	13.6441
6	16.06	16.06	16.06	IPI:IPI00871597.1; IPI:IPI00306378.5; IPI:IPI00294713.4	Gene_Symbol=MASP2 21 kDa protein; Gene_Symbol=MASP2 Isoform 2 of Mannan-binding lectin serine protease 2; Gene_Symbol=MASP2 Isoform 1 of Mannan-binding lectin serine protease 2	99	VLATLCGQESTDTER	Propionamide(C)@6; Label:13C(6)15N(4)(R)@15		-0.126081	1702.68	568.568	1702.81	568.61	3	14	10.6207
6	16.06	16.06	16.06	IPI:IPI00871597.1; IPI:IPI00306378.5; IPI:IPI00294713.4	Gene_Symbol=MASP2 21 kDa protein; Gene_Symbol=MASP2 Isoform 2 of Mannan-binding lectin serine protease 2; Gene_Symbol=MASP2 Isoform 1 of Mannan-binding lectin serine protease 2	28.73	LASPGFPGEYANDQER	Label:13C(6)15N(4)(R)@16		-0.101439	1759.7	587.575	1759.8	587.609	3	13	13.6801
6	16.06	16.06	16.06	IPI:IPI00871597.1; IPI:IPI00306378.5; IPI:IPI00294713.4	Gene_Symbol=MASP2 21 kDa protein; Gene_Symbol=MASP2 Isoform 2 of Mannan-binding lectin serine protease 2; Gene_Symbol=MASP2 Isoform 1 of Mannan-binding lectin serine protease 2	26.67	LASPGFPGEYANDQER			0.538619	1750.33	876.174	1749.8	875.905	2	9	13.7242
6	16.06	16.06	16.06	IPI:IPI00871597.1; IPI:IPI00306378.5; IPI:IPI00294713.4	Gene_Symbol=MASP2 21 kDa protein; Gene_Symbol=MASP2 Isoform 2 of Mannan-binding lectin serine protease 2; Gene_Symbol=MASP2 Isoform 1 of Mannan-binding lectin serine protease 2	7.582	LASPGFPGEYANDQER	Label:13C(6)15N(4)(R)@16		-0.0937481	1759.71	587.577	1759.8	587.609	3	10	13.7107
6	16.06	16.06	16.06	IPI:IPI00871597.1; IPI:IPI00306378.5; IPI:IPI00294713.4	Gene_Symbol=MASP2 21 kDa protein; Gene_Symbol=MASP2 Isoform 2 of Mannan-binding lectin serine protease 2; Gene_Symbol=MASP2 Isoform 1 of Mannan-binding lectin serine protease 2	6.186	LASPGFPGEYANDQER	Label:13C(6)15N(4)(R)@16		0.12178	1759.93	880.97	1759.8	880.909	2	7	13.6741
6	16.06	16.06	16.06	IPI:IPI00871597.1; IPI:IPI00306378.5; IPI:IPI00294713.4	Gene_Symbol=MASP2 21 kDa protein; Gene_Symbol=MASP2 Isoform 2 of Mannan-binding lectin serine protease 2; Gene_Symbol=MASP2 Isoform 1 of Mannan-binding lectin serine protease 2	0	LASPGFPGEYANDQER			0.66545	1750.46	876.238	1749.8	875.905	2	7	13.6869
6	16.06	16.06	16.06	IPI:IPI00871597.1; IPI:IPI00306378.5; IPI:IPI00294713.4	Gene_Symbol=MASP2 21 kDa protein; Gene_Symbol=MASP2 Isoform 2 of Mannan-binding lectin serine protease 2; Gene_Symbol=MASP2 Isoform 1 of Mannan-binding lectin serine protease 2	99	VLATLCGQESTDTER	Propionamide(C)@6; Label:13C(6)15N(4)(R)@15		-0.0952454	1702.71	852.363	1702.81	852.411	2	15	10.5524
6	16.06	16.06	16.06	IPI:IPI00871597.1; IPI:IPI00306378.5; IPI:IPI00294713.4	Gene_Symbol=MASP2 21 kDa protein; Gene_Symbol=MASP2 Isoform 2 of Mannan-binding lectin serine protease 2; Gene_Symbol=MASP2 Isoform 1 of Mannan-binding lectin serine protease 2	99	VLATLCGQESTDTER	Propionamide(C)@6; Label:13C(6)15N(4)(R)@15		-0.0982971	1702.71	852.362	1702.81	852.411	2	15	10.5824
6	16.06	16.06	16.06	IPI:IPI00871597.1; IPI:IPI00306378.5; IPI:IPI00294713.4	Gene_Symbol=MASP2 21 kDa protein; Gene_Symbol=MASP2 Isoform 2 of Mannan-binding lectin serine protease 2; Gene_Symbol=MASP2 Isoform 1 of Mannan-binding lectin serine protease 2	99	VLATLCGQESTDTER	Propionamide(C)@6		0.407164	1693.21	847.61	1692.8	847.407	2	15	10.665
6	16.06	16.06	16.06	IPI:IPI00871597.1; IPI:IPI00306378.5; IPI:IPI00294713.4	Gene_Symbol=MASP2 21 kDa protein; Gene_Symbol=MASP2 Isoform 2 of Mannan-binding lectin serine protease 2; Gene_Symbol=MASP2 Isoform 1 of Mannan-binding lectin serine protease 2	99	VLATLCGQESTDTER	Propionamide(C)@6; Label:13C(6)15N(4)(R)@15		0.898895	1703.71	852.86	1702.81	852.411	2	13	12.3302
6	16.06	16.06	16.06	IPI:IPI00871597.1; IPI:IPI00306378.5; IPI:IPI00294713.4	Gene_Symbol=MASP2 21 kDa protein; Gene_Symbol=MASP2 Isoform 2 of Mannan-binding lectin serine protease 2; Gene_Symbol=MASP2 Isoform 1 of Mannan-binding lectin serine protease 2	99	VLATLCGQESTDTER	Propionamide(C)@6; Label:13C(6)15N(4)(R)@15		-0.048994	1702.76	568.593	1702.81	568.61	3	14	10.659
6	16.06	16.06	16.06	IPI:IPI00871597.1; IPI:IPI00306378.5; IPI:IPI00294713.4	Gene_Symbol=MASP2 21 kDa protein; Gene_Symbol=MASP2 Isoform 2 of Mannan-binding lectin serine protease 2; Gene_Symbol=MASP2 Isoform 1 of Mannan-binding lectin serine protease 2	94.03	VLATLCGQESTDTER	Propionamide(C)@6		1.18841	1693.99	848.001	1692.8	847.407	2	12	10.7091
6	16.06	16.06	16.06	IPI:IPI00871597.1; IPI:IPI00306378.5; IPI:IPI00294713.4	Gene_Symbol=MASP2 21 kDa protein; Gene_Symbol=MASP2 Isoform 2 of Mannan-binding lectin serine protease 2; Gene_Symbol=MASP2 Isoform 1 of Mannan-binding lectin serine protease 2	94.03	VLATLCGQESTDTER	Propionamide(C)@6; Label:13C(6)15N(4)(R)@15		0.890961	1703.7	852.856	1702.81	852.411	2	10	12.3019
6	16.06	16.06	16.06	IPI:IPI00871597.1; IPI:IPI00306378.5; IPI:IPI00294713.4	Gene_Symbol=MASP2 21 kDa protein; Gene_Symbol=MASP2 Isoform 2 of Mannan-binding lectin serine protease 2; Gene_Symbol=MASP2 Isoform 1 of Mannan-binding lectin serine protease 2	7.403	VLATLCGQESTDTER	Propionamide(C)@6; Label:13C(6)15N(4)(R)@15		-0.0581493	1702.75	568.59	1702.81	568.61	3	10	7.363
6	10.64	10.64	10.64	IPI:IPI00016915.1	Gene_Symbol=IGFBP7 Insulin-like growth factor-binding protein 7	99	AGAAAGGPGVSGVCVCK	Propionamide(C)@14; Propionamide(C)@16		0.413512	1545.16	773.586	1544.74	773.379	2	15	9.6744
6	10.64	10.64	10.64	IPI:IPI00016915.1	Gene_Symbol=IGFBP7 Insulin-like growth factor-binding protein 7	99	GEGEPCGGGGAGR	Propionamide(C)@6		0.247402	1173.73	587.873	1173.48	587.749	2	13	6.7112
6	10.64	10.64	10.64	IPI:IPI00016915.1	Gene_Symbol=IGFBP7 Insulin-like growth factor-binding protein 7	99	AGAAAGGPGVSGVCVCK	Propionamide(C)@14; Propionamide(C)@16; Label:13C(6)15N(2)(K)@17		-0.0809115	1552.68	777.346	1552.76	777.386	2	16	9.5412
6	10.64	10.64	10.64	IPI:IPI00016915.1	Gene_Symbol=IGFBP7 Insulin-like growth factor-binding protein 7	99	AGAAAGGPGVSGVCVCK	Propionamide(C)@14; Propionamide(C)@16; Label:13C(6)15N(2)(K)@17		-0.0750522	1552.68	777.349	1552.76	777.386	2	14	9.565
6	10.64	10.64	10.64	IPI:IPI00016915.1	Gene_Symbol=IGFBP7 Insulin-like growth factor-binding protein 7	99	AGAAAGGPGVSGVCVCK	Propionamide(C)@14; Propionamide(C)@16; Label:13C(6)15N(2)(K)@17		-0.116997	1552.64	518.554	1552.76	518.593	3	18	9.571
6	10.64	10.64	10.64	IPI:IPI00016915.1	Gene_Symbol=IGFBP7 Insulin-like growth factor-binding protein 7	99	AGAAAGGPGVSGVCVCK	Propionamide(C)@14; Propionamide(C)@16; Label:13C(6)15N(2)(K)@17		-0.0324019	1552.73	518.582	1552.76	518.593	3	16	9.601
6	10.64	10.64	10.64	IPI:IPI00016915.1	Gene_Symbol=IGFBP7 Insulin-like growth factor-binding protein 7	94.03	AGAAAGGPGVSGVCVCK	Propionamide(C)@14; Propionamide(C)@16; Label:13C(6)15N(2)(K)@17		-0.101053	1552.66	777.336	1552.76	777.386	2	10	10.6723
6	10.64	10.64	10.64	IPI:IPI00016915.1	Gene_Symbol=IGFBP7 Insulin-like growth factor-binding protein 7	21.94	AGAAAGGPGVSGVCVCK	Propionamide(C)@14; Propionamide(C)@16; Label:13C(6)15N(2)(K)@17		0.907858	1553.67	777.84	1552.76	777.386	2	10	10.7331
6	10.64	10.64	10.64	IPI:IPI00016915.1	Gene_Symbol=IGFBP7 Insulin-like growth factor-binding protein 7	99	GEGEPCGGGGAGR	Propionamide(C)@6; Label:13C(6)15N(4)(R)@13		-0.0452903	1183.45	592.73	1183.49	592.753	2	16	6.6147
6	10.64	10.64	10.64	IPI:IPI00016915.1	Gene_Symbol=IGFBP7 Insulin-like growth factor-binding protein 7	99	GEGEPCGGGGAGR	Propionamide(C)@6; Label:13C(6)15N(4)(R)@13		-0.0512718	1183.44	592.727	1183.49	592.753	2	15	6.6385
6	10.64	10.64	10.64	IPI:IPI00016915.1	Gene_Symbol=IGFBP7 Insulin-like growth factor-binding protein 7	99	GEGEPCGGGGAGR	Propionamide(C)@6		0.381924	1173.87	587.94	1173.48	587.749	2	14	6.6808
6	10.64	10.64	10.64	IPI:IPI00016915.1	Gene_Symbol=IGFBP7 Insulin-like growth factor-binding protein 7	0	GEGEPCGGGGAGR	Propionamide(C)@6; Label:13C(6)15N(4)(R)@13		-0.0368675	1183.45	592.735	1183.49	592.753	2	7	8.2511
6	6.158	2.956	2.956	IPI:IPI00007221.1	Gene_Symbol=SERPINA5 Plasma serine protease inhibitor	99	AAAATGTIFTFR	Label:13C(6)15N(4)(R)@12		-0.0553066	1235.6	618.807	1235.65	618.834	2	13	19.179
6	6.158	2.956	2.956	IPI:IPI00007221.1	Gene_Symbol=SERPINA5 Plasma serine protease inhibitor	22.61	GFQQLLQELNQPR	Label:13C(6)15N(4)(R)@13		0.878988	1580.71	791.364	1579.83	790.925	2	9	22.1411
6	6.158	2.956	2.956	IPI:IPI00007221.1	Gene_Symbol=SERPINA5 Plasma serine protease inhibitor	99	AAAATGTIFTFR	Label:13C(6)15N(4)(R)@12		-0.0527431	1235.6	618.808	1235.65	618.834	2	13	19.2151
6	6.158	2.956	2.956	IPI:IPI00007221.1	Gene_Symbol=SERPINA5 Plasma serine protease inhibitor	17.75	AAAATGTIFTFR	Label:13C(6)15N(4)(R)@12		0.968819	1236.62	413.215	1235.65	412.892	3	10	13.172
6	7.789	2.316	2.316	IPI:IPI00784842.1	Gene_Symbol=LOC100294459;IGHV4-31;IGHG1;LOC100290146 Putative uncharacterized protein DKFZp686G11190	99	ADDTAVYYCAR	Propionamide(C)@9		0.329042	1317.9	659.955	1317.57	659.79	2	11	10.2625
6	7.789	2.316	2.316	IPI:IPI00784842.1	Gene_Symbol=LOC100294459;IGHV4-31;IGHG1;LOC100290146 Putative uncharacterized protein DKFZp686G11190	8.391	THTCPPCPAPELLGGPSVFLFPPKPK	Propionamide(C)@4; Propionamide(C)@7; Label:13C(6)15N(2)(K)@24; Label:13C(6)15N(2)(K)@26		-0.114995	2887.4	722.856	2887.51	722.885	4	11	22.1102
6	7.789	2.316	2.316	IPI:IPI00784842.1	Gene_Symbol=LOC100294459;IGHV4-31;IGHG1;LOC100290146 Putative uncharacterized protein DKFZp686G11190	99	ADDTAVYYCAR	Propionamide(C)@9; Label:13C(6)15N(4)(R)@11		-0.0615511	1327.51	664.764	1327.57	664.794	2	11	9.9175
6	7.789	2.316	2.316	IPI:IPI00784842.1	Gene_Symbol=LOC100294459;IGHV4-31;IGHG1;LOC100290146 Putative uncharacterized protein DKFZp686G11190	99	ADDTAVYYCAR	Propionamide(C)@9; Label:13C(6)15N(4)(R)@11		0.909274	1328.48	665.249	1327.57	664.794	2	11	11.4732
6	7.789	2.316	2.316	IPI:IPI00784842.1	Gene_Symbol=LOC100294459;IGHV4-31;IGHG1;LOC100290146 Putative uncharacterized protein DKFZp686G11190	99	ADDTAVYYCAR	Propionamide(C)@9; Label:13C(6)15N(4)(R)@11		-0.0641145	1327.51	664.762	1327.57	664.794	2	11	9.8936
6	7.789	2.316	2.316	IPI:IPI00784842.1	Gene_Symbol=LOC100294459;IGHV4-31;IGHG1;LOC100290146 Putative uncharacterized protein DKFZp686G11190	51.49	ADDTAVYYCAR	Propionamide(C)@9		-0.026915	1317.54	659.777	1317.57	659.79	2	11	10.1448
6	7.789	2.316	2.316	IPI:IPI00784842.1	Gene_Symbol=LOC100294459;IGHV4-31;IGHG1;LOC100290146 Putative uncharacterized protein DKFZp686G11190	16.23	ADDTAVYYCAR	Propionamide(C)@9; Label:13C(6)15N(4)(R)@11		-0.0570478	1327.52	443.513	1327.57	443.532	3	10	10.2998
6	7.789	2.316	2.316	IPI:IPI00784842.1	Gene_Symbol=LOC100294459;IGHV4-31;IGHG1;LOC100290146 Putative uncharacterized protein DKFZp686G11190	0	ADDTAVYYCAR	Propionamide(C)@9; Label:13C(6)15N(4)(R)@11		0.910617	1328.48	665.25	1327.57	664.794	2	6	11.4493
6	3.141	3.141	3.141	IPI:IPI00942787.1; IPI:IPI00641737.1; IPI:IPI00607707.2; IPI:IPI00478493.3; IPI:IPI00477597.2; IPI:IPI00431645.1	Gene_Symbol=HP 42 kDa protein; Gene_Symbol=HP Haptoglobin; Gene_Symbol=HPR Isoform 2 of Haptoglobin-related protein; Gene_Symbol=HP haptoglobin isoform 2 preproprotein; Gene_Symbol=HPR Isoform 1 of Haptoglobin-related protein; Gene_Symbol=HP HP protein	98.7	SCAVAEYGVYVK	Propionamide(C)@2; Label:13C(6)15N(2)(K)@12		-0.0774429	1366.59	684.303	1366.67	684.341	2	10	14.0256
7	4.329	3.33	3.33	IPI:IPI00744889.2; IPI:IPI00025861.3	Gene_Symbol=CDH1 E-cadherin; Gene_Symbol=CDH1 Cadherin-1	99	GQVPENEANVVITTLK	Label:13C(6)15N(2)(K)@16		-0.120724	1718.81	860.412	1718.93	860.472	2	14	18.7988
7	4.329	3.33	3.33	IPI:IPI00744889.2; IPI:IPI00025861.3	Gene_Symbol=CDH1 E-cadherin; Gene_Symbol=CDH1 Cadherin-1	99	NTGVISVVTTGLDR	Label:13C(6)15N(4)(R)@14		-0.0741714	1440.71	721.361	1440.78	721.398	2	12	19.137
7	4.329	3.33	3.33	IPI:IPI00744889.2; IPI:IPI00025861.3	Gene_Symbol=CDH1 E-cadherin; Gene_Symbol=CDH1 Cadherin-1	99	GQVPENEANVVITTLK	Label:13C(6)15N(2)(K)@16		-0.0532325	1718.88	573.966	1718.93	573.984	3	16	18.714
7	4.329	3.33	3.33	IPI:IPI00744889.2; IPI:IPI00025861.3	Gene_Symbol=CDH1 E-cadherin; Gene_Symbol=CDH1 Cadherin-1	99	GQVPENEANVVITTLK	Label:13C(6)15N(2)(K)@16		-0.0943569	1718.84	860.425	1718.93	860.472	2	13	18.7748
7	4.329	3.33	3.33	IPI:IPI00744889.2; IPI:IPI00025861.3	Gene_Symbol=CDH1 E-cadherin; Gene_Symbol=CDH1 Cadherin-1	99	NTGVISVVTTGLDR	Label:13C(6)15N(4)(R)@14		-0.0663589	1440.71	721.365	1440.78	721.398	2	14	19.1609
7	4.791	4.791	4.791	IPI:IPI00927191.1; IPI:IPI00796919.2; IPI:IPI00441550.4; IPI:IPI00441344.2	Gene_Symbol=GLB1 beta-galactosidase isoform b; Gene_Symbol=GLB1 Beta-galactosidase; Gene_Symbol=GLB1 Isoform 2 of Beta-galactosidase; Gene_Symbol=GLB1 Isoform 1 of Beta-galactosidase	99	AYVAVDGIPQGVLER			-0.871213	1584.98	793.495	1585.85	793.93	2	10	19.2941
7	4.791	4.791	4.791	IPI:IPI00927191.1; IPI:IPI00796919.2; IPI:IPI00441550.4; IPI:IPI00441344.2	Gene_Symbol=GLB1 beta-galactosidase isoform b; Gene_Symbol=GLB1 Beta-galactosidase; Gene_Symbol=GLB1 Isoform 2 of Beta-galactosidase; Gene_Symbol=GLB1 Isoform 1 of Beta-galactosidase	99	TVGAALDILCPSGPIK	Propionamide(C)@10; Label:13C(6)15N(2)(K)@16		-0.107574	1632.79	817.404	1632.9	817.457	2	13	22.1041
7	4.791	4.791	4.791	IPI:IPI00927191.1; IPI:IPI00796919.2; IPI:IPI00441550.4; IPI:IPI00441344.2	Gene_Symbol=GLB1 beta-galactosidase isoform b; Gene_Symbol=GLB1 Beta-galactosidase; Gene_Symbol=GLB1 Isoform 2 of Beta-galactosidase; Gene_Symbol=GLB1 Isoform 1 of Beta-galactosidase	99	AYVAVDGIPQGVLER	Label:13C(6)15N(4)(R)@15		-0.0776024	1595.78	798.896	1595.85	798.935	2	13	19.095
7	4.791	4.791	4.791	IPI:IPI00927191.1; IPI:IPI00796919.2; IPI:IPI00441550.4; IPI:IPI00441344.2	Gene_Symbol=GLB1 beta-galactosidase isoform b; Gene_Symbol=GLB1 Beta-galactosidase; Gene_Symbol=GLB1 Isoform 2 of Beta-galactosidase; Gene_Symbol=GLB1 Isoform 1 of Beta-galactosidase	99	AYVAVDGIPQGVLER	Label:13C(6)15N(4)(R)@15		-0.0896873	1595.77	798.89	1595.85	798.935	2	12	19.1188
7	4.791	4.791	4.791	IPI:IPI00927191.1; IPI:IPI00796919.2; IPI:IPI00441550.4; IPI:IPI00441344.2	Gene_Symbol=GLB1 beta-galactosidase isoform b; Gene_Symbol=GLB1 Beta-galactosidase; Gene_Symbol=GLB1 Isoform 2 of Beta-galactosidase; Gene_Symbol=GLB1 Isoform 1 of Beta-galactosidase	99	AYVAVDGIPQGVLER	Label:13C(6)15N(4)(R)@15		-0.0819492	1595.77	532.932	1595.85	532.959	3	14	19.185
7	4.791	4.791	4.791	IPI:IPI00927191.1; IPI:IPI00796919.2; IPI:IPI00441550.4; IPI:IPI00441344.2	Gene_Symbol=GLB1 beta-galactosidase isoform b; Gene_Symbol=GLB1 Beta-galactosidase; Gene_Symbol=GLB1 Isoform 2 of Beta-galactosidase; Gene_Symbol=GLB1 Isoform 1 of Beta-galactosidase	99	AYVAVDGIPQGVLER	Label:13C(6)15N(4)(R)@15		-0.0823154	1595.77	532.931	1595.85	532.959	3	13	19.155
7	4.791	4.791	4.791	IPI:IPI00927191.1; IPI:IPI00796919.2; IPI:IPI00441550.4; IPI:IPI00441344.2	Gene_Symbol=GLB1 beta-galactosidase isoform b; Gene_Symbol=GLB1 Beta-galactosidase; Gene_Symbol=GLB1 Isoform 2 of Beta-galactosidase; Gene_Symbol=GLB1 Isoform 1 of Beta-galactosidase	99	TVGAALDILCPSGPIK	Propionamide(C)@10; Label:13C(6)15N(2)(K)@16		-0.0809622	1632.82	817.417	1632.9	817.457	2	15	22.0803
7	6.128	6.128	6.128	IPI:IPI00909135.1; IPI:IPI00884085.1; IPI:IPI00550854.2; IPI:IPI00153049.3	Gene_Symbol=MXRA8 cDNA FLJ52846, highly similar to Homo sapiens matrix-remodelling associated 8 (MXRA8), mRNA; Gene_Symbol=MXRA8 cDNA FLJ38647 fis, clone HHDPC2006862, highly similar to Homo sapiens matrix-remodelling associated 8 (MXRA8), mRNA; Gene_Symbol=MXRA8 Isoform 1 of Matrix-remodeling-associated protein 8; Gene_Symbol=MXRA8 Isoform 2 of Matrix-remodeling-associated protein 8	99	GAPALLTCVNR	Propionamide(C)@8		0.298037	1184.93	593.473	1184.63	593.324	2	12	14.3337
7	6.128	6.128	6.128	IPI:IPI00909135.1; IPI:IPI00884085.1; IPI:IPI00550854.2; IPI:IPI00153049.3	Gene_Symbol=MXRA8 cDNA FLJ52846, highly similar to Homo sapiens matrix-remodelling associated 8 (MXRA8), mRNA; Gene_Symbol=MXRA8 cDNA FLJ38647 fis, clone HHDPC2006862, highly similar to Homo sapiens matrix-remodelling associated 8 (MXRA8), mRNA; Gene_Symbol=MXRA8 Isoform 1 of Matrix-remodeling-associated protein 8; Gene_Symbol=MXRA8 Isoform 2 of Matrix-remodeling-associated protein 8	99	LLDLYSAGEQR	Label:13C(6)15N(4)(R)@11		-0.0665648	1273.59	637.801	1273.65	637.834	2	12	14.5817
7	6.128	6.128	6.128	IPI:IPI00909135.1; IPI:IPI00884085.1; IPI:IPI00550854.2; IPI:IPI00153049.3	Gene_Symbol=MXRA8 cDNA FLJ52846, highly similar to Homo sapiens matrix-remodelling associated 8 (MXRA8), mRNA; Gene_Symbol=MXRA8 cDNA FLJ38647 fis, clone HHDPC2006862, highly similar to Homo sapiens matrix-remodelling associated 8 (MXRA8), mRNA; Gene_Symbol=MXRA8 Isoform 1 of Matrix-remodeling-associated protein 8; Gene_Symbol=MXRA8 Isoform 2 of Matrix-remodeling-associated protein 8	99	GAPALLTCVNR	Propionamide(C)@8; Label:13C(6)15N(4)(R)@11		-0.0589867	1194.58	598.299	1194.64	598.328	2	13	14.1507
7	6.128	6.128	6.128	IPI:IPI00909135.1; IPI:IPI00884085.1; IPI:IPI00550854.2; IPI:IPI00153049.3	Gene_Symbol=MXRA8 cDNA FLJ52846, highly similar to Homo sapiens matrix-remodelling associated 8 (MXRA8), mRNA; Gene_Symbol=MXRA8 cDNA FLJ38647 fis, clone HHDPC2006862, highly similar to Homo sapiens matrix-remodelling associated 8 (MXRA8), mRNA; Gene_Symbol=MXRA8 Isoform 1 of Matrix-remodeling-associated protein 8; Gene_Symbol=MXRA8 Isoform 2 of Matrix-remodeling-associated protein 8	99	GAPALLTCVNR	Propionamide(C)@8; Label:13C(6)15N(4)(R)@11		0.105198	1194.75	598.381	1194.64	598.328	2	11	14.1806
7	6.128	6.128	6.128	IPI:IPI00909135.1; IPI:IPI00884085.1; IPI:IPI00550854.2; IPI:IPI00153049.3	Gene_Symbol=MXRA8 cDNA FLJ52846, highly similar to Homo sapiens matrix-remodelling associated 8 (MXRA8), mRNA; Gene_Symbol=MXRA8 cDNA FLJ38647 fis, clone HHDPC2006862, highly similar to Homo sapiens matrix-remodelling associated 8 (MXRA8), mRNA; Gene_Symbol=MXRA8 Isoform 1 of Matrix-remodeling-associated protein 8; Gene_Symbol=MXRA8 Isoform 2 of Matrix-remodeling-associated protein 8	99	GAPALLTCVNR	Propionamide(C)@8		1.3559	1185.99	594.002	1184.63	593.324	2	12	14.1927
7	6.128	6.128	6.128	IPI:IPI00909135.1; IPI:IPI00884085.1; IPI:IPI00550854.2; IPI:IPI00153049.3	Gene_Symbol=MXRA8 cDNA FLJ52846, highly similar to Homo sapiens matrix-remodelling associated 8 (MXRA8), mRNA; Gene_Symbol=MXRA8 cDNA FLJ38647 fis, clone HHDPC2006862, highly similar to Homo sapiens matrix-remodelling associated 8 (MXRA8), mRNA; Gene_Symbol=MXRA8 Isoform 1 of Matrix-remodeling-associated protein 8; Gene_Symbol=MXRA8 Isoform 2 of Matrix-remodeling-associated protein 8	99	GAPALLTCVNR	Propionamide(C)@8; Deamidated(N)@10; Label:13C(6)15N(4)(R)@11		-0.0649749	1195.56	598.788	1195.63	598.82	2	13	15.4554
7	6.128	6.128	6.128	IPI:IPI00909135.1; IPI:IPI00884085.1; IPI:IPI00550854.2; IPI:IPI00153049.3	Gene_Symbol=MXRA8 cDNA FLJ52846, highly similar to Homo sapiens matrix-remodelling associated 8 (MXRA8), mRNA; Gene_Symbol=MXRA8 cDNA FLJ38647 fis, clone HHDPC2006862, highly similar to Homo sapiens matrix-remodelling associated 8 (MXRA8), mRNA; Gene_Symbol=MXRA8 Isoform 1 of Matrix-remodeling-associated protein 8; Gene_Symbol=MXRA8 Isoform 2 of Matrix-remodeling-associated protein 8	99	GAPALLTCVNR	Propionamide(C)@8; Deamidated(N)@10; Label:13C(6)15N(4)(R)@11		-0.0660736	1195.56	598.787	1195.63	598.82	2	15	15.4795
7	6.128	6.128	6.128	IPI:IPI00909135.1; IPI:IPI00884085.1; IPI:IPI00550854.2; IPI:IPI00153049.3	Gene_Symbol=MXRA8 cDNA FLJ52846, highly similar to Homo sapiens matrix-remodelling associated 8 (MXRA8), mRNA; Gene_Symbol=MXRA8 cDNA FLJ38647 fis, clone HHDPC2006862, highly similar to Homo sapiens matrix-remodelling associated 8 (MXRA8), mRNA; Gene_Symbol=MXRA8 Isoform 1 of Matrix-remodeling-associated protein 8; Gene_Symbol=MXRA8 Isoform 2 of Matrix-remodeling-associated protein 8	99	LLDLYSAGEQR	Label:13C(6)15N(4)(R)@11		-0.0547239	1273.6	637.807	1273.65	637.834	2	14	15.8225
7	6.128	6.128	6.128	IPI:IPI00909135.1; IPI:IPI00884085.1; IPI:IPI00550854.2; IPI:IPI00153049.3	Gene_Symbol=MXRA8 cDNA FLJ52846, highly similar to Homo sapiens matrix-remodelling associated 8 (MXRA8), mRNA; Gene_Symbol=MXRA8 cDNA FLJ38647 fis, clone HHDPC2006862, highly similar to Homo sapiens matrix-remodelling associated 8 (MXRA8), mRNA; Gene_Symbol=MXRA8 Isoform 1 of Matrix-remodeling-associated protein 8; Gene_Symbol=MXRA8 Isoform 2 of Matrix-remodeling-associated protein 8	99	LLDLYSAGEQR	Label:13C(6)15N(4)(R)@11		-0.0594847	1273.59	637.805	1273.65	637.834	2	15	15.8463
7	6.128	6.128	6.128	IPI:IPI00909135.1; IPI:IPI00884085.1; IPI:IPI00550854.2; IPI:IPI00153049.3	Gene_Symbol=MXRA8 cDNA FLJ52846, highly similar to Homo sapiens matrix-remodelling associated 8 (MXRA8), mRNA; Gene_Symbol=MXRA8 cDNA FLJ38647 fis, clone HHDPC2006862, highly similar to Homo sapiens matrix-remodelling associated 8 (MXRA8), mRNA; Gene_Symbol=MXRA8 Isoform 1 of Matrix-remodeling-associated protein 8; Gene_Symbol=MXRA8 Isoform 2 of Matrix-remodeling-associated protein 8	99	LLDLYSAGEQR	Label:13C(6)15N(4)(R)@11		-0.0555784	1273.6	637.807	1273.65	637.834	2	11	14.5505
7	3.082	3.082	3.082	IPI:IPI00908404.1; IPI:IPI00012102.1	Gene_Symbol=GNS cDNA FLJ51188, highly similar to N-acetylglucosamine-6-sulfatase; Gene_Symbol=GNS N-acetylglucosamine-6-sulfatase	99	AFQNVFAPR			0.338471	1048.88	525.449	1048.55	525.28	2	12	16.1377
7	3.082	3.082	3.082	IPI:IPI00908404.1; IPI:IPI00012102.1	Gene_Symbol=GNS cDNA FLJ51188, highly similar to N-acetylglucosamine-6-sulfatase; Gene_Symbol=GNS N-acetylglucosamine-6-sulfatase	99	NFNIHGTNK	Label:13C(6)15N(2)(K)@9		-0.0285793	1051.5	526.758	1051.53	526.772	2	14	7.1621
7	3.082	3.082	3.082	IPI:IPI00908404.1; IPI:IPI00012102.1	Gene_Symbol=GNS cDNA FLJ51188, highly similar to N-acetylglucosamine-6-sulfatase; Gene_Symbol=GNS N-acetylglucosamine-6-sulfatase	99	AFQNVFAPR	Label:13C(6)15N(4)(R)@9		-0.042601	1058.51	530.263	1058.55	530.284	2	12	16.0043
7	3.082	3.082	3.082	IPI:IPI00908404.1; IPI:IPI00012102.1	Gene_Symbol=GNS cDNA FLJ51188, highly similar to N-acetylglucosamine-6-sulfatase; Gene_Symbol=GNS N-acetylglucosamine-6-sulfatase	99	AFQNVFAPR			0.386444	1048.93	525.473	1048.55	525.28	2	11	16.1617
7	3.082	3.082	3.082	IPI:IPI00908404.1; IPI:IPI00012102.1	Gene_Symbol=GNS cDNA FLJ51188, highly similar to N-acetylglucosamine-6-sulfatase; Gene_Symbol=GNS N-acetylglucosamine-6-sulfatase	99	AFQNVFAPR	Deamidated(N)@4; Label:13C(6)15N(4)(R)@9		-0.0437064	1059.49	530.754	1059.54	530.776	2	12	17.1994
7	3.082	3.082	3.082	IPI:IPI00908404.1; IPI:IPI00012102.1	Gene_Symbol=GNS cDNA FLJ51188, highly similar to N-acetylglucosamine-6-sulfatase; Gene_Symbol=GNS N-acetylglucosamine-6-sulfatase	99	AFQNVFAPR	Deamidated(N)@4; Label:13C(6)15N(4)(R)@9		-0.0496878	1059.49	530.751	1059.54	530.776	2	13	17.2273
7	3.082	3.082	3.082	IPI:IPI00908404.1; IPI:IPI00012102.1	Gene_Symbol=GNS cDNA FLJ51188, highly similar to N-acetylglucosamine-6-sulfatase; Gene_Symbol=GNS N-acetylglucosamine-6-sulfatase	99	AFQNVFAPR	Label:13C(6)15N(4)(R)@9		-0.0601791	1058.49	530.254	1058.55	530.284	2	11	16.028
7	3.082	3.082	3.082	IPI:IPI00908404.1; IPI:IPI00012102.1	Gene_Symbol=GNS cDNA FLJ51188, highly similar to N-acetylglucosamine-6-sulfatase; Gene_Symbol=GNS N-acetylglucosamine-6-sulfatase	99	NFNIHGTNK	Label:13C(6)15N(2)(K)@9		-0.0479885	1051.48	526.748	1051.53	526.772	2	12	7.1859
7	16.06	16.06	16.06	IPI:IPI00871597.1; IPI:IPI00306378.5; IPI:IPI00294713.4	Gene_Symbol=MASP2 21 kDa protein; Gene_Symbol=MASP2 Isoform 2 of Mannan-binding lectin serine protease 2; Gene_Symbol=MASP2 Isoform 1 of Mannan-binding lectin serine protease 2	99	LASPGFPGEYANDQER	Label:13C(6)15N(4)(R)@16		-0.110397	1759.69	880.854	1759.8	880.909	2	11	13.6441
7	16.06	16.06	16.06	IPI:IPI00871597.1; IPI:IPI00306378.5; IPI:IPI00294713.4	Gene_Symbol=MASP2 21 kDa protein; Gene_Symbol=MASP2 Isoform 2 of Mannan-binding lectin serine protease 2; Gene_Symbol=MASP2 Isoform 1 of Mannan-binding lectin serine protease 2	99	VLATLCGQESTDTER	Propionamide(C)@6; Label:13C(6)15N(4)(R)@15		-0.126081	1702.68	568.568	1702.81	568.61	3	14	10.6207
7	16.06	16.06	16.06	IPI:IPI00871597.1; IPI:IPI00306378.5; IPI:IPI00294713.4	Gene_Symbol=MASP2 21 kDa protein; Gene_Symbol=MASP2 Isoform 2 of Mannan-binding lectin serine protease 2; Gene_Symbol=MASP2 Isoform 1 of Mannan-binding lectin serine protease 2	28.73	LASPGFPGEYANDQER	Label:13C(6)15N(4)(R)@16		-0.101439	1759.7	587.575	1759.8	587.609	3	13	13.6801
7	16.06	16.06	16.06	IPI:IPI00871597.1; IPI:IPI00306378.5; IPI:IPI00294713.4	Gene_Symbol=MASP2 21 kDa protein; Gene_Symbol=MASP2 Isoform 2 of Mannan-binding lectin serine protease 2; Gene_Symbol=MASP2 Isoform 1 of Mannan-binding lectin serine protease 2	26.67	LASPGFPGEYANDQER			0.538619	1750.33	876.174	1749.8	875.905	2	9	13.7242
7	16.06	16.06	16.06	IPI:IPI00871597.1; IPI:IPI00306378.5; IPI:IPI00294713.4	Gene_Symbol=MASP2 21 kDa protein; Gene_Symbol=MASP2 Isoform 2 of Mannan-binding lectin serine protease 2; Gene_Symbol=MASP2 Isoform 1 of Mannan-binding lectin serine protease 2	7.582	LASPGFPGEYANDQER	Label:13C(6)15N(4)(R)@16		-0.0937481	1759.71	587.577	1759.8	587.609	3	10	13.7107
7	16.06	16.06	16.06	IPI:IPI00871597.1; IPI:IPI00306378.5; IPI:IPI00294713.4	Gene_Symbol=MASP2 21 kDa protein; Gene_Symbol=MASP2 Isoform 2 of Mannan-binding lectin serine protease 2; Gene_Symbol=MASP2 Isoform 1 of Mannan-binding lectin serine protease 2	6.186	LASPGFPGEYANDQER	Label:13C(6)15N(4)(R)@16		0.12178	1759.93	880.97	1759.8	880.909	2	7	13.6741
7	16.06	16.06	16.06	IPI:IPI00871597.1; IPI:IPI00306378.5; IPI:IPI00294713.4	Gene_Symbol=MASP2 21 kDa protein; Gene_Symbol=MASP2 Isoform 2 of Mannan-binding lectin serine protease 2; Gene_Symbol=MASP2 Isoform 1 of Mannan-binding lectin serine protease 2	0	LASPGFPGEYANDQER			0.66545	1750.46	876.238	1749.8	875.905	2	7	13.6869
7	16.06	16.06	16.06	IPI:IPI00871597.1; IPI:IPI00306378.5; IPI:IPI00294713.4	Gene_Symbol=MASP2 21 kDa protein; Gene_Symbol=MASP2 Isoform 2 of Mannan-binding lectin serine protease 2; Gene_Symbol=MASP2 Isoform 1 of Mannan-binding lectin serine protease 2	99	VLATLCGQESTDTER	Propionamide(C)@6; Label:13C(6)15N(4)(R)@15		-0.0952454	1702.71	852.363	1702.81	852.411	2	15	10.5524
7	16.06	16.06	16.06	IPI:IPI00871597.1; IPI:IPI00306378.5; IPI:IPI00294713.4	Gene_Symbol=MASP2 21 kDa protein; Gene_Symbol=MASP2 Isoform 2 of Mannan-binding lectin serine protease 2; Gene_Symbol=MASP2 Isoform 1 of Mannan-binding lectin serine protease 2	99	VLATLCGQESTDTER	Propionamide(C)@6; Label:13C(6)15N(4)(R)@15		-0.0982971	1702.71	852.362	1702.81	852.411	2	15	10.5824
7	16.06	16.06	16.06	IPI:IPI00871597.1; IPI:IPI00306378.5; IPI:IPI00294713.4	Gene_Symbol=MASP2 21 kDa protein; Gene_Symbol=MASP2 Isoform 2 of Mannan-binding lectin serine protease 2; Gene_Symbol=MASP2 Isoform 1 of Mannan-binding lectin serine protease 2	99	VLATLCGQESTDTER	Propionamide(C)@6		0.407164	1693.21	847.61	1692.8	847.407	2	15	10.665
7	16.06	16.06	16.06	IPI:IPI00871597.1; IPI:IPI00306378.5; IPI:IPI00294713.4	Gene_Symbol=MASP2 21 kDa protein; Gene_Symbol=MASP2 Isoform 2 of Mannan-binding lectin serine protease 2; Gene_Symbol=MASP2 Isoform 1 of Mannan-binding lectin serine protease 2	99	VLATLCGQESTDTER	Propionamide(C)@6; Label:13C(6)15N(4)(R)@15		0.898895	1703.71	852.86	1702.81	852.411	2	13	12.3302
7	16.06	16.06	16.06	IPI:IPI00871597.1; IPI:IPI00306378.5; IPI:IPI00294713.4	Gene_Symbol=MASP2 21 kDa protein; Gene_Symbol=MASP2 Isoform 2 of Mannan-binding lectin serine protease 2; Gene_Symbol=MASP2 Isoform 1 of Mannan-binding lectin serine protease 2	99	VLATLCGQESTDTER	Propionamide(C)@6; Label:13C(6)15N(4)(R)@15		-0.048994	1702.76	568.593	1702.81	568.61	3	14	10.659
7	16.06	16.06	16.06	IPI:IPI00871597.1; IPI:IPI00306378.5; IPI:IPI00294713.4	Gene_Symbol=MASP2 21 kDa protein; Gene_Symbol=MASP2 Isoform 2 of Mannan-binding lectin serine protease 2; Gene_Symbol=MASP2 Isoform 1 of Mannan-binding lectin serine protease 2	94.03	VLATLCGQESTDTER	Propionamide(C)@6		1.18841	1693.99	848.001	1692.8	847.407	2	12	10.7091
7	16.06	16.06	16.06	IPI:IPI00871597.1; IPI:IPI00306378.5; IPI:IPI00294713.4	Gene_Symbol=MASP2 21 kDa protein; Gene_Symbol=MASP2 Isoform 2 of Mannan-binding lectin serine protease 2; Gene_Symbol=MASP2 Isoform 1 of Mannan-binding lectin serine protease 2	94.03	VLATLCGQESTDTER	Propionamide(C)@6; Label:13C(6)15N(4)(R)@15		0.890961	1703.7	852.856	1702.81	852.411	2	10	12.3019
7	16.06	16.06	16.06	IPI:IPI00871597.1; IPI:IPI00306378.5; IPI:IPI00294713.4	Gene_Symbol=MASP2 21 kDa protein; Gene_Symbol=MASP2 Isoform 2 of Mannan-binding lectin serine protease 2; Gene_Symbol=MASP2 Isoform 1 of Mannan-binding lectin serine protease 2	7.403	VLATLCGQESTDTER	Propionamide(C)@6; Label:13C(6)15N(4)(R)@15		-0.0581493	1702.75	568.59	1702.81	568.61	3	10	7.363
7	4.902	4.902	4.902	IPI:IPI00022255.1	Gene_Symbol=OLFM4 Olfactomedin-4	99	EYVQLISVYEK	Label:13C(6)15N(2)(K)@11		-0.0859229	1377.64	689.828	1377.73	689.871	2	12	19.2168
7	4.902	4.902	4.902	IPI:IPI00022255.1	Gene_Symbol=OLFM4 Olfactomedin-4	99	TEEIFYYYDTNTGK	Label:13C(6)15N(2)(K)@14		-0.112705	1750.67	876.342	1750.78	876.398	2	12	18.8228
7	4.902	4.902	4.902	IPI:IPI00022255.1	Gene_Symbol=OLFM4 Olfactomedin-4	99	EYVQLISVYEK	Label:13C(6)15N(2)(K)@11		-0.0942237	1377.63	689.824	1377.73	689.871	2	11	19.193
7	4.902	4.902	4.902	IPI:IPI00022255.1	Gene_Symbol=OLFM4 Olfactomedin-4	99	TEEIFYYYDTNTGK	Label:13C(6)15N(2)(K)@14		-0.093296	1750.69	876.351	1750.78	876.398	2	12	18.8467
7	4.902	4.902	4.902	IPI:IPI00022255.1	Gene_Symbol=OLFM4 Olfactomedin-4	99	TEEIFYYYDTNTGK	Label:13C(6)15N(2)(K)@14		-0.123583	1750.66	584.56	1750.78	584.601	3	13	18.8748
7	10.64	10.64	10.64	IPI:IPI00016915.1	Gene_Symbol=IGFBP7 Insulin-like growth factor-binding protein 7	99	AGAAAGGPGVSGVCVCK	Propionamide(C)@14; Propionamide(C)@16		0.413512	1545.16	773.586	1544.74	773.379	2	15	9.6744
7	10.64	10.64	10.64	IPI:IPI00016915.1	Gene_Symbol=IGFBP7 Insulin-like growth factor-binding protein 7	99	GEGEPCGGGGAGR	Propionamide(C)@6		0.247402	1173.73	587.873	1173.48	587.749	2	13	6.7112
7	10.64	10.64	10.64	IPI:IPI00016915.1	Gene_Symbol=IGFBP7 Insulin-like growth factor-binding protein 7	99	AGAAAGGPGVSGVCVCK	Propionamide(C)@14; Propionamide(C)@16; Label:13C(6)15N(2)(K)@17		-0.0809115	1552.68	777.346	1552.76	777.386	2	16	9.5412
7	10.64	10.64	10.64	IPI:IPI00016915.1	Gene_Symbol=IGFBP7 Insulin-like growth factor-binding protein 7	99	AGAAAGGPGVSGVCVCK	Propionamide(C)@14; Propionamide(C)@16; Label:13C(6)15N(2)(K)@17		-0.0750522	1552.68	777.349	1552.76	777.386	2	14	9.565
7	10.64	10.64	10.64	IPI:IPI00016915.1	Gene_Symbol=IGFBP7 Insulin-like growth factor-binding protein 7	99	AGAAAGGPGVSGVCVCK	Propionamide(C)@14; Propionamide(C)@16; Label:13C(6)15N(2)(K)@17		-0.116997	1552.64	518.554	1552.76	518.593	3	18	9.571
7	10.64	10.64	10.64	IPI:IPI00016915.1	Gene_Symbol=IGFBP7 Insulin-like growth factor-binding protein 7	99	AGAAAGGPGVSGVCVCK	Propionamide(C)@14; Propionamide(C)@16; Label:13C(6)15N(2)(K)@17		-0.0324019	1552.73	518.582	1552.76	518.593	3	16	9.601
7	10.64	10.64	10.64	IPI:IPI00016915.1	Gene_Symbol=IGFBP7 Insulin-like growth factor-binding protein 7	94.03	AGAAAGGPGVSGVCVCK	Propionamide(C)@14; Propionamide(C)@16; Label:13C(6)15N(2)(K)@17		-0.101053	1552.66	777.336	1552.76	777.386	2	10	10.6723
7	10.64	10.64	10.64	IPI:IPI00016915.1	Gene_Symbol=IGFBP7 Insulin-like growth factor-binding protein 7	21.94	AGAAAGGPGVSGVCVCK	Propionamide(C)@14; Propionamide(C)@16; Label:13C(6)15N(2)(K)@17		0.907858	1553.67	777.84	1552.76	777.386	2	10	10.7331
7	10.64	10.64	10.64	IPI:IPI00016915.1	Gene_Symbol=IGFBP7 Insulin-like growth factor-binding protein 7	99	GEGEPCGGGGAGR	Propionamide(C)@6; Label:13C(6)15N(4)(R)@13		-0.0452903	1183.45	592.73	1183.49	592.753	2	16	6.6147
7	10.64	10.64	10.64	IPI:IPI00016915.1	Gene_Symbol=IGFBP7 Insulin-like growth factor-binding protein 7	99	GEGEPCGGGGAGR	Propionamide(C)@6; Label:13C(6)15N(4)(R)@13		-0.0512718	1183.44	592.727	1183.49	592.753	2	15	6.6385
7	10.64	10.64	10.64	IPI:IPI00016915.1	Gene_Symbol=IGFBP7 Insulin-like growth factor-binding protein 7	99	GEGEPCGGGGAGR	Propionamide(C)@6		0.381924	1173.87	587.94	1173.48	587.749	2	14	6.6808
7	10.64	10.64	10.64	IPI:IPI00016915.1	Gene_Symbol=IGFBP7 Insulin-like growth factor-binding protein 7	0	GEGEPCGGGGAGR	Propionamide(C)@6; Label:13C(6)15N(4)(R)@13		-0.0368675	1183.45	592.735	1183.49	592.753	2	7	8.2511
7	6.158	2.956	2.956	IPI:IPI00007221.1	Gene_Symbol=SERPINA5 Plasma serine protease inhibitor	99	AAAATGTIFTFR	Label:13C(6)15N(4)(R)@12		-0.0553066	1235.6	618.807	1235.65	618.834	2	13	19.179
7	6.158	2.956	2.956	IPI:IPI00007221.1	Gene_Symbol=SERPINA5 Plasma serine protease inhibitor	22.61	GFQQLLQELNQPR	Label:13C(6)15N(4)(R)@13		0.878988	1580.71	791.364	1579.83	790.925	2	9	22.1411
7	6.158	2.956	2.956	IPI:IPI00007221.1	Gene_Symbol=SERPINA5 Plasma serine protease inhibitor	99	AAAATGTIFTFR	Label:13C(6)15N(4)(R)@12		-0.0527431	1235.6	618.808	1235.65	618.834	2	13	19.2151
7	6.158	2.956	2.956	IPI:IPI00007221.1	Gene_Symbol=SERPINA5 Plasma serine protease inhibitor	17.75	AAAATGTIFTFR	Label:13C(6)15N(4)(R)@12		0.968819	1236.62	413.215	1235.65	412.892	3	10	13.172
7	7.789	2.316	2.316	IPI:IPI00784842.1	Gene_Symbol=LOC100294459;IGHV4-31;IGHG1;LOC100290146 Putative uncharacterized protein DKFZp686G11190	99	ADDTAVYYCAR	Propionamide(C)@9		0.329042	1317.9	659.955	1317.57	659.79	2	11	10.2625
7	7.789	2.316	2.316	IPI:IPI00784842.1	Gene_Symbol=LOC100294459;IGHV4-31;IGHG1;LOC100290146 Putative uncharacterized protein DKFZp686G11190	8.391	THTCPPCPAPELLGGPSVFLFPPKPK	Propionamide(C)@4; Propionamide(C)@7; Label:13C(6)15N(2)(K)@24; Label:13C(6)15N(2)(K)@26		-0.114995	2887.4	722.856	2887.51	722.885	4	11	22.1102
7	7.789	2.316	2.316	IPI:IPI00784842.1	Gene_Symbol=LOC100294459;IGHV4-31;IGHG1;LOC100290146 Putative uncharacterized protein DKFZp686G11190	99	ADDTAVYYCAR	Propionamide(C)@9; Label:13C(6)15N(4)(R)@11		-0.0615511	1327.51	664.764	1327.57	664.794	2	11	9.9175
7	7.789	2.316	2.316	IPI:IPI00784842.1	Gene_Symbol=LOC100294459;IGHV4-31;IGHG1;LOC100290146 Putative uncharacterized protein DKFZp686G11190	99	ADDTAVYYCAR	Propionamide(C)@9; Label:13C(6)15N(4)(R)@11		0.909274	1328.48	665.249	1327.57	664.794	2	11	11.4732
7	7.789	2.316	2.316	IPI:IPI00784842.1	Gene_Symbol=LOC100294459;IGHV4-31;IGHG1;LOC100290146 Putative uncharacterized protein DKFZp686G11190	99	ADDTAVYYCAR	Propionamide(C)@9; Label:13C(6)15N(4)(R)@11		-0.0641145	1327.51	664.762	1327.57	664.794	2	11	9.8936
7	7.789	2.316	2.316	IPI:IPI00784842.1	Gene_Symbol=LOC100294459;IGHV4-31;IGHG1;LOC100290146 Putative uncharacterized protein DKFZp686G11190	51.49	ADDTAVYYCAR	Propionamide(C)@9		-0.026915	1317.54	659.777	1317.57	659.79	2	11	10.1448
7	7.789	2.316	2.316	IPI:IPI00784842.1	Gene_Symbol=LOC100294459;IGHV4-31;IGHG1;LOC100290146 Putative uncharacterized protein DKFZp686G11190	16.23	ADDTAVYYCAR	Propionamide(C)@9; Label:13C(6)15N(4)(R)@11		-0.0570478	1327.52	443.513	1327.57	443.532	3	10	10.2998
7	7.789	2.316	2.316	IPI:IPI00784842.1	Gene_Symbol=LOC100294459;IGHV4-31;IGHG1;LOC100290146 Putative uncharacterized protein DKFZp686G11190	0	ADDTAVYYCAR	Propionamide(C)@9; Label:13C(6)15N(4)(R)@11		0.910617	1328.48	665.25	1327.57	664.794	2	6	11.4493
7	20.97	20.97	20.97	IPI:IPI00894496.1; IPI:IPI00894239.1; IPI:IPI00894009.1; IPI:IPI00893884.1; IPI:IPI00893769.1; IPI:IPI00893517.1; IPI:IPI00220815.1; IPI:IPI00220814.1; IPI:IPI00220813.1; IPI:IPI00029658.1	Gene_Symbol=EFEMP1 Putative uncharacterized protein EFEMP1; Gene_Symbol=EFEMP1 Putative uncharacterized protein EFEMP1; Gene_Symbol=EFEMP1 Putative uncharacterized protein EFEMP1; Gene_Symbol=EFEMP1 Putative uncharacterized protein EFEMP1; Gene_Symbol=EFEMP1 Putative uncharacterized protein EFEMP1; Gene_Symbol=EFEMP1 Putative uncharacterized protein EFEMP1; Gene_Symbol=EFEMP1 Isoform 4 of EGF-con…	99	DIDECDIVPDACK	Propionamide(C)@5; Propionamide(C)@12; Label:13C(6)15N(2)(K)@13		-0.094408	1584.59	793.305	1584.69	793.352	2	14	14.5675
7	20.97	20.97	20.97	IPI:IPI00894496.1; IPI:IPI00894239.1; IPI:IPI00894009.1; IPI:IPI00893884.1; IPI:IPI00893769.1; IPI:IPI00893517.1; IPI:IPI00220815.1; IPI:IPI00220814.1; IPI:IPI00220813.1; IPI:IPI00029658.1	Gene_Symbol=EFEMP1 Putative uncharacterized protein EFEMP1; Gene_Symbol=EFEMP1 Putative uncharacterized protein EFEMP1; Gene_Symbol=EFEMP1 Putative uncharacterized protein EFEMP1; Gene_Symbol=EFEMP1 Putative uncharacterized protein EFEMP1; Gene_Symbol=EFEMP1 Putative uncharacterized protein EFEMP1; Gene_Symbol=EFEMP1 Putative uncharacterized protein EFEMP1; Gene_Symbol=EFEMP1 Isoform 4 of EGF-con…	99	DIDECDIVPDACK	Propionamide(C)@5; Propionamide(C)@12; Label:13C(6)15N(2)(K)@13		-0.082201	1584.61	793.311	1584.69	793.352	2	14	14.5956
7	3.141	3.141	3.141	IPI:IPI00942787.1; IPI:IPI00641737.1; IPI:IPI00607707.2; IPI:IPI00478493.3; IPI:IPI00477597.2; IPI:IPI00431645.1	Gene_Symbol=HP 42 kDa protein; Gene_Symbol=HP Haptoglobin; Gene_Symbol=HPR Isoform 2 of Haptoglobin-related protein; Gene_Symbol=HP haptoglobin isoform 2 preproprotein; Gene_Symbol=HPR Isoform 1 of Haptoglobin-related protein; Gene_Symbol=HP HP protein	98.7	SCAVAEYGVYVK	Propionamide(C)@2; Label:13C(6)15N(2)(K)@12		-0.0774429	1366.59	684.303	1366.67	684.341	2	10	14.0256
7	0.8673	0.8673	0	IPI:IPI00645887.1; IPI:IPI00217987.8	Gene_Symbol=ITGAM integrin alpha-M isoform 1 precursor; Gene_Symbol=ITGAM Integrin alpha-M	89.82	ILVVITDGEK	Label:13C(6)15N(2)(K)@10		-0.123159	1093.52	547.769	1093.65	547.831	2	8	10.1269
7	0.8673	0.8673	0	IPI:IPI00645887.1; IPI:IPI00217987.8	Gene_Symbol=ITGAM integrin alpha-M isoform 1 precursor; Gene_Symbol=ITGAM Integrin alpha-M	7.658	ILVVITDGEK	Label:13C(6)15N(2)(K)@10		-0.13732	1093.51	547.762	1093.65	547.831	2	8	10.1573
7	0.8673	0.8673	0	IPI:IPI00645887.1; IPI:IPI00217987.8	Gene_Symbol=ITGAM integrin alpha-M isoform 1 precursor; Gene_Symbol=ITGAM Integrin alpha-M	0	ILVVITDGEK	Label:13C(6)15N(2)(K)@10		-0.12499	1093.52	547.769	1093.65	547.831	2	7	10.1147
7	0.8673	0.8673	0	IPI:IPI00645887.1; IPI:IPI00217987.8	Gene_Symbol=ITGAM integrin alpha-M isoform 1 precursor; Gene_Symbol=ITGAM Integrin alpha-M	0	ILVVITDGEK	Label:13C(6)15N(2)(K)@10		-0.124746	1093.52	547.769	1093.65	547.831	2	6	10.1636
8	14.43	14.43	14.43	IPI:IPI00884926.1; IPI:IPI00022429.3	Gene_Symbol=ORM1 alpha-1-acid glycoprotein 1 precursor; Gene_Symbol=ORM1 Alpha-1-acid glycoprotein 1	99	EQLGEFYEALDCLR	Propionamide(C)@12; Label:13C(6)15N(4)(R)@14		-0.0979601	1765.72	883.869	1765.82	883.918	2	13	22.1278
8	14.43	14.43	14.43	IPI:IPI00884926.1; IPI:IPI00022429.3	Gene_Symbol=ORM1 alpha-1-acid glycoprotein 1 precursor; Gene_Symbol=ORM1 Alpha-1-acid glycoprotein 1	99	YVGGQEHFAHLLILR	Label:13C(6)15N(4)(R)@15		-0.0989738	1761.86	881.936	1761.96	881.985	2	11	17.5308
8	14.43	14.43	14.43	IPI:IPI00884926.1; IPI:IPI00022429.3	Gene_Symbol=ORM1 alpha-1-acid glycoprotein 1 precursor; Gene_Symbol=ORM1 Alpha-1-acid glycoprotein 1	99	EQLGEFYEALDCLR	Propionamide(C)@12; Label:13C(6)15N(4)(R)@14		-0.0866076	1765.74	883.875	1765.82	883.918	2	12	22.0918
8	14.43	14.43	14.43	IPI:IPI00884926.1; IPI:IPI00022429.3	Gene_Symbol=ORM1 alpha-1-acid glycoprotein 1 precursor; Gene_Symbol=ORM1 Alpha-1-acid glycoprotein 1	99	YVGGQEHFAHLLILR	Label:13C(6)15N(4)(R)@15		-0.0757937	1761.88	588.301	1761.96	588.326	3	14	17.423
8	14.43	14.43	14.43	IPI:IPI00884926.1; IPI:IPI00022429.3	Gene_Symbol=ORM1 alpha-1-acid glycoprotein 1 precursor; Gene_Symbol=ORM1 Alpha-1-acid glycoprotein 1	99	YVGGQEHFAHLLILR	Label:13C(6)15N(4)(R)@15		-0.0269046	1761.93	588.317	1761.96	588.326	3	13	17.4589
8	14.43	14.43	14.43	IPI:IPI00884926.1; IPI:IPI00022429.3	Gene_Symbol=ORM1 alpha-1-acid glycoprotein 1 precursor; Gene_Symbol=ORM1 Alpha-1-acid glycoprotein 1	99	YVGGQEHFAHLLILR	Label:13C(6)15N(4)(R)@15		-0.0861564	1761.87	881.942	1761.96	881.985	2	12	17.501
8	14.43	14.43	14.43	IPI:IPI00884926.1; IPI:IPI00022429.3	Gene_Symbol=ORM1 alpha-1-acid glycoprotein 1 precursor; Gene_Symbol=ORM1 Alpha-1-acid glycoprotein 1	31.81	YVGGQEHFAHLLILR	Label:13C(6)15N(4)(R)@15		0.0487047	1762	441.508	1761.96	441.496	4	12	17.417
8	14.43	14.43	14.43	IPI:IPI00884926.1; IPI:IPI00022429.3	Gene_Symbol=ORM1 alpha-1-acid glycoprotein 1 precursor; Gene_Symbol=ORM1 Alpha-1-acid glycoprotein 1	31.81	YVGGQEHFAHLLILR	Label:13C(6)15N(4)(R)@15		1.09265	1763.05	441.769	1761.96	441.496	4	12	18.6788
8	14.43	14.43	14.43	IPI:IPI00884926.1; IPI:IPI00022429.3	Gene_Symbol=ORM1 alpha-1-acid glycoprotein 1 precursor; Gene_Symbol=ORM1 Alpha-1-acid glycoprotein 1	9.404	YVGGQEHFAHLLILR	Label:13C(6)15N(4)(R)@15		-1.70044	1760.26	441.071	1761.96	441.496	4	12	17.3932
8	14.43	14.43	14.43	IPI:IPI00884926.1; IPI:IPI00022429.3	Gene_Symbol=ORM1 alpha-1-acid glycoprotein 1 precursor; Gene_Symbol=ORM1 Alpha-1-acid glycoprotein 1	1.89	YVGGQEHFAHLLILR	Label:13C(6)15N(4)(R)@15		0.93623	1762.89	588.638	1761.96	588.326	3	11	18.685
8	14.43	14.43	14.43	IPI:IPI00884926.1; IPI:IPI00022429.3	Gene_Symbol=ORM1 alpha-1-acid glycoprotein 1 precursor; Gene_Symbol=ORM1 Alpha-1-acid glycoprotein 1	0	YVGGQEHFAHLLILR	Label:13C(6)15N(4)(R)@15		0.930737	1762.89	588.636	1761.96	588.326	3	9	18.7148
8	4.11	4.11	4.11	IPI:IPI00872573.2; IPI:IPI00795055.1; IPI:IPI00009793.4	Gene_Symbol=C1RL 48 kDa protein; Gene_Symbol=C1RL cDNA FLJ14022 fis, clone HEMBA1003538, weakly similar to COMPLEMENT C1R COMPONENT; Gene_Symbol=C1RL Complement C1r subcomponent-like protein	99	EACNAWLQK	Propionamide(C)@3; Deamidated(N)@4; Label:13C(6)15N(2)(K)@9		-0.0637521	1141.47	571.741	1141.53	571.773	2	10	11.1851
8	4.11	4.11	4.11	IPI:IPI00872573.2; IPI:IPI00795055.1; IPI:IPI00009793.4	Gene_Symbol=C1RL 48 kDa protein; Gene_Symbol=C1RL cDNA FLJ14022 fis, clone HEMBA1003538, weakly similar to COMPLEMENT C1R COMPONENT; Gene_Symbol=C1RL Complement C1r subcomponent-like protein	99	GGGALLGDR			0.219916	814.65	408.332	814.43	408.222	2	12	8.9186
8	4.11	4.11	4.11	IPI:IPI00872573.2; IPI:IPI00795055.1; IPI:IPI00009793.4	Gene_Symbol=C1RL 48 kDa protein; Gene_Symbol=C1RL cDNA FLJ14022 fis, clone HEMBA1003538, weakly similar to COMPLEMENT C1R COMPONENT; Gene_Symbol=C1RL Complement C1r subcomponent-like protein	0	EACNAWLQK	Propionamide(C)@3; Deamidated(N)@4; Label:13C(6)15N(2)(K)@9		-0.0648508	1141.47	571.741	1141.53	571.773	2	8	11.1552
8	4.11	4.11	4.11	IPI:IPI00872573.2; IPI:IPI00795055.1; IPI:IPI00009793.4	Gene_Symbol=C1RL 48 kDa protein; Gene_Symbol=C1RL cDNA FLJ14022 fis, clone HEMBA1003538, weakly similar to COMPLEMENT C1R COMPONENT; Gene_Symbol=C1RL Complement C1r subcomponent-like protein	0	EACNAWLQK	Propionamide(C)@3		0.347304	1132.88	567.448	1132.53	567.274	2	7	11.7223
8	4.11	4.11	4.11	IPI:IPI00872573.2; IPI:IPI00795055.1; IPI:IPI00009793.4	Gene_Symbol=C1RL 48 kDa protein; Gene_Symbol=C1RL cDNA FLJ14022 fis, clone HEMBA1003538, weakly similar to COMPLEMENT C1R COMPONENT; Gene_Symbol=C1RL Complement C1r subcomponent-like protein	99	GGGALLGDR	Label:13C(6)15N(4)(R)@9		-0.0275495	824.41	413.212	824.438	413.226	2	11	8.81
8	4.11	4.11	4.11	IPI:IPI00872573.2; IPI:IPI00795055.1; IPI:IPI00009793.4	Gene_Symbol=C1RL 48 kDa protein; Gene_Symbol=C1RL cDNA FLJ14022 fis, clone HEMBA1003538, weakly similar to COMPLEMENT C1R COMPONENT; Gene_Symbol=C1RL Complement C1r subcomponent-like protein	99	GGGALLGDR	Label:13C(6)15N(4)(R)@9		0.171486	824.609	413.312	824.438	413.226	2	11	8.847
8	4.11	4.11	4.11	IPI:IPI00872573.2; IPI:IPI00795055.1; IPI:IPI00009793.4	Gene_Symbol=C1RL 48 kDa protein; Gene_Symbol=C1RL cDNA FLJ14022 fis, clone HEMBA1003538, weakly similar to COMPLEMENT C1R COMPONENT; Gene_Symbol=C1RL Complement C1r subcomponent-like protein	99	GGGALLGDR	Label:13C(6)15N(4)(R)@9		0.0196917	824.458	413.236	824.438	413.226	2	9	10.4887
8	4.11	4.11	4.11	IPI:IPI00872573.2; IPI:IPI00795055.1; IPI:IPI00009793.4	Gene_Symbol=C1RL 48 kDa protein; Gene_Symbol=C1RL cDNA FLJ14022 fis, clone HEMBA1003538, weakly similar to COMPLEMENT C1R COMPONENT; Gene_Symbol=C1RL Complement C1r subcomponent-like protein	94.32	GGGALLGDR	Label:13C(6)15N(4)(R)@9		-0.0299298	824.408	413.211	824.438	413.226	2	9	9.9013
8	4.11	4.11	4.11	IPI:IPI00872573.2; IPI:IPI00795055.1; IPI:IPI00009793.4	Gene_Symbol=C1RL 48 kDa protein; Gene_Symbol=C1RL cDNA FLJ14022 fis, clone HEMBA1003538, weakly similar to COMPLEMENT C1R COMPONENT; Gene_Symbol=C1RL Complement C1r subcomponent-like protein	0	GGGALLGDR	Label:13C(6)15N(4)(R)@9		-0.0785138	824.359	413.187	824.438	413.226	2	6	17.3527
8	15.18	15.18	15.18	IPI:IPI00647861.1; IPI:IPI00007800.1	Gene_Symbol=ANGPTL2 cDNA FLJ90245 fis, clone NT2RM2001792, highly similar to Homo sapiens angiopoietin-related protein-2 mRNA; Gene_Symbol=ANGPTL2 Angiopoietin-related protein 2	99	DHDVYTGNCAHYQK	Propionamide(C)@9; Label:13C(6)15N(2)(K)@14		-0.0991138	1728.64	865.328	1728.74	865.378	2	13	6.9507
8	15.18	15.18	15.18	IPI:IPI00647861.1; IPI:IPI00007800.1	Gene_Symbol=ANGPTL2 cDNA FLJ90245 fis, clone NT2RM2001792, highly similar to Homo sapiens angiopoietin-related protein-2 mRNA; Gene_Symbol=ANGPTL2 Angiopoietin-related protein 2	99	YHGNAGDSFTWHNGK	Label:13C(6)15N(2)(K)@15		0.0998605	1697.84	425.468	1697.74	425.443	4	15	8.5022
8	15.18	15.18	15.18	IPI:IPI00647861.1; IPI:IPI00007800.1	Gene_Symbol=ANGPTL2 cDNA FLJ90245 fis, clone NT2RM2001792, highly similar to Homo sapiens angiopoietin-related protein-2 mRNA; Gene_Symbol=ANGPTL2 Angiopoietin-related protein 2	99	DHDVYTGNCAHYQK	Deamidated(N)@8; Propionamide(C)@9; Label:13C(6)15N(2)(K)@14		-1.03908	1728.69	577.236	1729.72	577.582	3	19	6.8786
8	15.18	15.18	15.18	IPI:IPI00647861.1; IPI:IPI00007800.1	Gene_Symbol=ANGPTL2 cDNA FLJ90245 fis, clone NT2RM2001792, highly similar to Homo sapiens angiopoietin-related protein-2 mRNA; Gene_Symbol=ANGPTL2 Angiopoietin-related protein 2	99	DHDVYTGNCAHYQK	Propionamide(C)@9; Label:13C(6)15N(2)(K)@14		-0.0120299	1728.73	577.25	1728.74	577.254	3	19	6.9146
8	15.18	15.18	15.18	IPI:IPI00647861.1; IPI:IPI00007800.1	Gene_Symbol=ANGPTL2 cDNA FLJ90245 fis, clone NT2RM2001792, highly similar to Homo sapiens angiopoietin-related protein-2 mRNA; Gene_Symbol=ANGPTL2 Angiopoietin-related protein 2	99	DHDVYTGNCAHYQK	Propionamide(C)@9; Label:13C(6)15N(2)(K)@14		-0.0248951	1728.72	865.365	1728.74	865.378	2	11	6.9206
8	15.18	15.18	15.18	IPI:IPI00647861.1; IPI:IPI00007800.1	Gene_Symbol=ANGPTL2 cDNA FLJ90245 fis, clone NT2RM2001792, highly similar to Homo sapiens angiopoietin-related protein-2 mRNA; Gene_Symbol=ANGPTL2 Angiopoietin-related protein 2	99	YHGNAGDSFTWHNGK	Label:13C(6)15N(2)(K)@15		-0.0149333	1697.73	566.917	1697.74	566.922	3	14	8.5425
8	15.18	15.18	15.18	IPI:IPI00647861.1; IPI:IPI00007800.1	Gene_Symbol=ANGPTL2 cDNA FLJ90245 fis, clone NT2RM2001792, highly similar to Homo sapiens angiopoietin-related protein-2 mRNA; Gene_Symbol=ANGPTL2 Angiopoietin-related protein 2	99	YHGNAGDSFTWHNGK	Label:13C(6)15N(2)(K)@15		-0.0533855	1697.69	566.904	1697.74	566.922	3	19	8.6383
8	15.18	15.18	15.18	IPI:IPI00647861.1; IPI:IPI00007800.1	Gene_Symbol=ANGPTL2 cDNA FLJ90245 fis, clone NT2RM2001792, highly similar to Homo sapiens angiopoietin-related protein-2 mRNA; Gene_Symbol=ANGPTL2 Angiopoietin-related protein 2	99	YHGNAGDSFTWHNGK	Label:13C(6)15N(2)(K)@15		-0.086026	1697.66	849.836	1697.74	849.879	2	13	8.6443
8	15.18	15.18	15.18	IPI:IPI00647861.1; IPI:IPI00007800.1	Gene_Symbol=ANGPTL2 cDNA FLJ90245 fis, clone NT2RM2001792, highly similar to Homo sapiens angiopoietin-related protein-2 mRNA; Gene_Symbol=ANGPTL2 Angiopoietin-related protein 2	99	YHGNAGDSFTWHNGK	Label:13C(6)15N(2)(K)@15		-0.0791901	1697.66	849.839	1697.74	849.879	2	13	8.6743
8	15.18	15.18	15.18	IPI:IPI00647861.1; IPI:IPI00007800.1	Gene_Symbol=ANGPTL2 cDNA FLJ90245 fis, clone NT2RM2001792, highly similar to Homo sapiens angiopoietin-related protein-2 mRNA; Gene_Symbol=ANGPTL2 Angiopoietin-related protein 2	99	YHGNAGDSFTWHNGK	Deamidated(N)@13; Label:13C(6)15N(2)(K)@15		-0.0133055	1698.71	425.686	1698.73	425.689	4	14	9.1611
8	15.18	15.18	15.18	IPI:IPI00647861.1; IPI:IPI00007800.1	Gene_Symbol=ANGPTL2 cDNA FLJ90245 fis, clone NT2RM2001792, highly similar to Homo sapiens angiopoietin-related protein-2 mRNA; Gene_Symbol=ANGPTL2 Angiopoietin-related protein 2	99	YHGNAGDSFTWHNGK	Deamidated(N)@13; Label:13C(6)15N(2)(K)@15		0.0646975	1698.79	425.705	1698.73	425.689	4	16	9.2042
8	15.18	15.18	15.18	IPI:IPI00647861.1; IPI:IPI00007800.1	Gene_Symbol=ANGPTL2 cDNA FLJ90245 fis, clone NT2RM2001792, highly similar to Homo sapiens angiopoietin-related protein-2 mRNA; Gene_Symbol=ANGPTL2 Angiopoietin-related protein 2	99	YHGNAGDSFTWHNGK	Deamidated(N)@13		0.336858	1691.05	846.532	1690.71	846.363	2	14	9.5286
8	15.18	15.18	15.18	IPI:IPI00647861.1; IPI:IPI00007800.1	Gene_Symbol=ANGPTL2 cDNA FLJ90245 fis, clone NT2RM2001792, highly similar to Homo sapiens angiopoietin-related protein-2 mRNA; Gene_Symbol=ANGPTL2 Angiopoietin-related protein 2	99	YHGNAGDSFTWHNGK	Deamidated(N)@13; Label:13C(6)15N(2)(K)@15		-0.0369128	1698.69	567.237	1698.73	567.25	3	14	9.5829
8	15.18	15.18	15.18	IPI:IPI00647861.1; IPI:IPI00007800.1	Gene_Symbol=ANGPTL2 cDNA FLJ90245 fis, clone NT2RM2001792, highly similar to Homo sapiens angiopoietin-related protein-2 mRNA; Gene_Symbol=ANGPTL2 Angiopoietin-related protein 2	99	YHGNAGDSFTWHNGK	Deamidated(N)@13; Label:13C(6)15N(2)(K)@15		-0.0427722	1698.68	567.235	1698.73	567.25	3	15	9.6211
8	15.18	15.18	15.18	IPI:IPI00647861.1; IPI:IPI00007800.1	Gene_Symbol=ANGPTL2 cDNA FLJ90245 fis, clone NT2RM2001792, highly similar to Homo sapiens angiopoietin-related protein-2 mRNA; Gene_Symbol=ANGPTL2 Angiopoietin-related protein 2	9.404	YHGNAGDSFTWHNGK	Deamidated(N)@13; Label:13C(6)15N(2)(K)@15		1.05908	1699.79	425.954	1698.73	425.689	4	12	10.5017
8	15.18	15.18	15.18	IPI:IPI00647861.1; IPI:IPI00007800.1	Gene_Symbol=ANGPTL2 cDNA FLJ90245 fis, clone NT2RM2001792, highly similar to Homo sapiens angiopoietin-related protein-2 mRNA; Gene_Symbol=ANGPTL2 Angiopoietin-related protein 2	0.5039	YHGNAGDSFTWHNGK	Deamidated(N)@13; Label:13C(6)15N(2)(K)@15		0.969984	1699.7	567.573	1698.73	567.25	3	11	10.6094
8	7.547	7.547	7.547	IPI:IPI00023728.1	Gene_Symbol=GGH Gamma-glutamyl hydrolase	99	FFNVLTTNTDGK			-0.0553358	1355.62	678.816	1355.67	678.843	2	12	18.2627
8	7.547	7.547	7.547	IPI:IPI00023728.1	Gene_Symbol=GGH Gamma-glutamyl hydrolase	99	YPVYGVQWHPEK			0.492771	1502.23	501.75	1501.74	501.586	3	14	14.0557
8	7.547	7.547	7.547	IPI:IPI00023728.1	Gene_Symbol=GGH Gamma-glutamyl hydrolase	99	FFNVLTTNTDGK	Label:13C(6)15N(2)(K)@12		-0.0690465	1363.62	682.816	1363.69	682.85	2	10	13.9835
8	7.547	7.547	7.547	IPI:IPI00023728.1	Gene_Symbol=GGH Gamma-glutamyl hydrolase	99	FFNVLTTNTDGK	Label:13C(6)15N(2)(K)@12		-0.0674596	1363.62	682.817	1363.69	682.85	2	11	14.0137
8	7.547	7.547	7.547	IPI:IPI00023728.1	Gene_Symbol=GGH Gamma-glutamyl hydrolase	99	FFNVLTTNTDGK	Deamidated(N)@3; Label:13C(6)15N(2)(K)@12		-0.0662457	1364.6	683.309	1364.67	683.342	2	12	17.2955
8	7.547	7.547	7.547	IPI:IPI00023728.1	Gene_Symbol=GGH Gamma-glutamyl hydrolase	99	FFNVLTTNTDGK	Label:13C(6)15N(2)(K)@12		0.167526	1363.85	682.934	1363.69	682.85	2	13	18.2925
8	7.547	7.547	7.547	IPI:IPI00023728.1	Gene_Symbol=GGH Gamma-glutamyl hydrolase	99	FFNVLTTNTDGK	Label:13C(6)15N(2)(K)@12		1.10893	1364.8	683.405	1363.69	682.85	2	13	18.3284
8	7.547	7.547	7.547	IPI:IPI00023728.1	Gene_Symbol=GGH Gamma-glutamyl hydrolase	99	FFNVLTTNTDGK			0.408287	1356.08	679.048	1355.67	678.843	2	13	18.3647
8	7.547	7.547	7.547	IPI:IPI00023728.1	Gene_Symbol=GGH Gamma-glutamyl hydrolase	99	FFNVLTTNTDGK	Label:13C(6)15N(2)(K)@12		0.9113	1364.6	683.306	1363.69	682.85	2	12	19.3325
8	7.547	7.547	7.547	IPI:IPI00023728.1	Gene_Symbol=GGH Gamma-glutamyl hydrolase	99	FFNVLTTNTDGK	Deamidated(N)@3; Label:13C(6)15N(2)(K)@12		-0.066856	1364.6	683.309	1364.67	683.342	2	13	19.3565
8	7.547	7.547	7.547	IPI:IPI00023728.1	Gene_Symbol=GGH Gamma-glutamyl hydrolase	99	FFNVLTTNTDGK	Deamidated(N)@3; Label:13C(6)15N(2)(K)@12		-0.0912701	1364.58	683.297	1364.67	683.342	2	10	17.2583
8	7.547	7.547	7.547	IPI:IPI00023728.1	Gene_Symbol=GGH Gamma-glutamyl hydrolase	99	YPVYGVQWHPEK	Label:13C(6)15N(2)(K)@12		-0.0679844	1509.68	755.848	1509.75	755.882	2	13	14.0073
8	7.547	7.547	7.547	IPI:IPI00023728.1	Gene_Symbol=GGH Gamma-glutamyl hydrolase	99	YPVYGVQWHPEK	Label:13C(6)15N(2)(K)@12		-0.0773838	1509.67	755.843	1509.75	755.882	2	12	14.0436
8	7.547	7.547	7.547	IPI:IPI00023728.1	Gene_Symbol=GGH Gamma-glutamyl hydrolase	0	YPVYGVQWHPEK	Label:13C(6)15N(2)(K)@12		-2.03348	1507.72	503.579	1509.75	504.257	3	9	13.7136
8	7.547	7.547	7.547	IPI:IPI00023728.1	Gene_Symbol=GGH Gamma-glutamyl hydrolase	0	YPVYGVQWHPEK	Label:13C(6)15N(2)(K)@12		-1.99457	1507.76	503.592	1509.75	504.257	3	10	13.7509
8	1.881	1.881	1.881	IPI:IPI00014375.3	Gene_Symbol=ENPEP Glutamyl aminopeptidase	99	ETNLLYDPK	Label:13C(6)15N(2)(K)@9		-0.0732709	1099.49	550.753	1099.56	550.789	2	13	12.41
8	1.881	1.881	1.881	IPI:IPI00014375.3	Gene_Symbol=ENPEP Glutamyl aminopeptidase	99	TQDVFTVIR			0.286767	1077.87	539.942	1077.58	539.798	2	13	17.0713
8	1.881	1.881	1.881	IPI:IPI00014375.3	Gene_Symbol=ENPEP Glutamyl aminopeptidase	99	ETNLLYDPK	Label:13C(6)15N(2)(K)@9		-0.071684	1099.49	550.754	1099.56	550.789	2	13	12.4466
8	1.881	1.881	1.881	IPI:IPI00014375.3	Gene_Symbol=ENPEP Glutamyl aminopeptidase	99	ETNLLYDPK	Deamidated(N)@3; Label:13C(6)15N(2)(K)@9		-0.0733998	1100.47	551.245	1100.55	551.281	2	11	13.4557
8	1.881	1.881	1.881	IPI:IPI00014375.3	Gene_Symbol=ENPEP Glutamyl aminopeptidase	99	ETNLLYDPK	Deamidated(N)@3; Label:13C(6)15N(2)(K)@9		-0.0812123	1100.47	551.241	1100.55	551.281	2	11	13.4862
8	1.881	1.881	1.881	IPI:IPI00014375.3	Gene_Symbol=ENPEP Glutamyl aminopeptidase	99	ETNLLYDPK			0.327525	1091.88	546.946	1091.55	546.782	2	10	12.6009
8	1.881	1.881	1.881	IPI:IPI00014375.3	Gene_Symbol=ENPEP Glutamyl aminopeptidase	99	TQDVFTVIR	Label:13C(6)15N(4)(R)@9		-0.0254572	1087.56	544.79	1087.59	544.802	2	10	13.5388
8	1.881	1.881	1.881	IPI:IPI00014375.3	Gene_Symbol=ENPEP Glutamyl aminopeptidase	99	TQDVFTVIR	Label:13C(6)15N(4)(R)@9		-0.0326593	1087.56	544.786	1087.59	544.802	2	11	16.9819
8	1.881	1.881	1.881	IPI:IPI00014375.3	Gene_Symbol=ENPEP Glutamyl aminopeptidase	99	TQDVFTVIR	Label:13C(6)15N(4)(R)@9		-0.0206964	1087.57	544.792	1087.59	544.802	2	12	17.0057
8	1.881	1.881	1.881	IPI:IPI00014375.3	Gene_Symbol=ENPEP Glutamyl aminopeptidase	99	TQDVFTVIR			0.31997	1077.9	539.958	1077.58	539.798	2	13	17.1192
8	1.881	1.881	1.881	IPI:IPI00014375.3	Gene_Symbol=ENPEP Glutamyl aminopeptidase	99	TQDVFTVIR	Label:13C(6)15N(4)(R)@9		-0.0491388	1087.54	544.778	1087.59	544.802	2	10	18.124
8	1.881	1.881	1.881	IPI:IPI00014375.3	Gene_Symbol=ENPEP Glutamyl aminopeptidase	99	TQDVFTVIR	Label:13C(6)15N(4)(R)@9		-0.0335138	1087.56	544.786	1087.59	544.802	2	10	19.1793
8	1.881	1.881	1.881	IPI:IPI00014375.3	Gene_Symbol=ENPEP Glutamyl aminopeptidase	94.32	TQDVFTVIR	Label:13C(6)15N(4)(R)@9		0.942316	1088.53	545.274	1087.59	544.802	2	9	18.9261
8	1.881	1.881	1.881	IPI:IPI00014375.3	Gene_Symbol=ENPEP Glutamyl aminopeptidase	31.81	TQDVFTVIR	Label:13C(6)15N(4)(R)@9		-0.0325372	1087.56	544.786	1087.59	544.802	2	9	13.5669
8	1.881	1.881	1.881	IPI:IPI00014375.3	Gene_Symbol=ENPEP Glutamyl aminopeptidase	0	TQDVFTVIR	Label:13C(6)15N(4)(R)@9		0.933161	1088.52	545.269	1087.59	544.802	2	8	18.9502
8	6.094	3.047	3.047	IPI:IPI00003919.1	Gene_Symbol=QPCT Isoform 1 of Glutaminyl-peptide cyclotransferase	99	HLVLACHYDSK	Propionamide(C)@6; Label:13C(6)15N(2)(K)@11		-0.0669159	1363.61	682.814	1363.68	682.847	2	12	7.7584
8	6.094	3.047	3.047	IPI:IPI00003919.1	Gene_Symbol=QPCT Isoform 1 of Glutaminyl-peptide cyclotransferase	3.609	YPGSPGSYAAR	Label:13C(6)15N(4)(R)@11		-0.0282409	1134.51	568.26	1134.53	568.274	2	8	7.9998
8	6.094	3.047	3.047	IPI:IPI00003919.1	Gene_Symbol=QPCT Isoform 1 of Glutaminyl-peptide cyclotransferase	99	HLVLACHYDSK	Propionamide(C)@6; Label:13C(6)15N(2)(K)@11		0.00143017	1363.68	455.568	1363.68	455.567	3	16	7.7223
8	6.094	3.047	3.047	IPI:IPI00003919.1	Gene_Symbol=QPCT Isoform 1 of Glutaminyl-peptide cyclotransferase	99	HLVLACHYDSK	Propionamide(C)@6; Label:13C(6)15N(2)(K)@11		0.0591084	1363.74	455.587	1363.68	455.567	3	16	7.7524
8	6.094	3.047	3.047	IPI:IPI00003919.1	Gene_Symbol=QPCT Isoform 1 of Glutaminyl-peptide cyclotransferase	99	HLVLACHYDSK	Propionamide(C)@6; Label:13C(6)15N(2)(K)@11		-0.0625214	1363.62	682.816	1363.68	682.847	2	12	7.7883
8	6.094	3.047	3.047	IPI:IPI00003919.1	Gene_Symbol=QPCT Isoform 1 of Glutaminyl-peptide cyclotransferase	0	HLVLACHYDSK	Propionamide(C)@6; Label:13C(6)15N(2)(K)@11		0.993862	1364.67	455.899	1363.68	455.567	3	10	8.985
9	4.259	4.259	4.259	IPI:IPI00394992.1; IPI:IPI00163207.1	Gene_Symbol=PGLYRP2 Isoform 2 of N-acetylmuramoyl-L-alanine amidase; Gene_Symbol=PGLYRP2 Isoform 1 of N-acetylmuramoyl-L-alanine amidase	99	AGLLRPDYALLGHR	Label:13C(6)15N(4)(R)@5; Label:13C(6)15N(4)(R)@14		-0.0395689	1570.85	524.622	1570.88	524.635	3	17	15.5578
9	4.259	4.259	4.259	IPI:IPI00394992.1; IPI:IPI00163207.1	Gene_Symbol=PGLYRP2 Isoform 2 of N-acetylmuramoyl-L-alanine amidase; Gene_Symbol=PGLYRP2 Isoform 1 of N-acetylmuramoyl-L-alanine amidase	99	GCPDVQASLPDAK	Propionamide(C)@2; Label:13C(6)15N(2)(K)@13		0.959373	1379.62	460.882	1378.66	460.562	3	16	10.8915
9	4.259	4.259	4.259	IPI:IPI00394992.1; IPI:IPI00163207.1	Gene_Symbol=PGLYRP2 Isoform 2 of N-acetylmuramoyl-L-alanine amidase; Gene_Symbol=PGLYRP2 Isoform 1 of N-acetylmuramoyl-L-alanine amidase	75.73	AGLLRPDYALLGHR	Label:13C(6)15N(4)(R)@5; Label:13C(6)15N(4)(R)@14		-0.0384702	1570.85	524.623	1570.88	524.635	3	13	15.5817
9	4.259	4.259	4.259	IPI:IPI00394992.1; IPI:IPI00163207.1	Gene_Symbol=PGLYRP2 Isoform 2 of N-acetylmuramoyl-L-alanine amidase; Gene_Symbol=PGLYRP2 Isoform 1 of N-acetylmuramoyl-L-alanine amidase	99	GCPDVQASLPDAK	Propionamide(C)@2; Label:13C(6)15N(2)(K)@13		-0.0687642	1378.6	460.539	1378.66	460.562	3	16	10.7405
9	4.259	4.259	4.259	IPI:IPI00394992.1; IPI:IPI00163207.1	Gene_Symbol=PGLYRP2 Isoform 2 of N-acetylmuramoyl-L-alanine amidase; Gene_Symbol=PGLYRP2 Isoform 1 of N-acetylmuramoyl-L-alanine amidase	99	GCPDVQASLPDAK	Propionamide(C)@2; Label:13C(6)15N(2)(K)@13		0.110418	1378.77	690.395	1378.66	690.339	2	15	10.8417
9	4.259	4.259	4.259	IPI:IPI00394992.1; IPI:IPI00163207.1	Gene_Symbol=PGLYRP2 Isoform 2 of N-acetylmuramoyl-L-alanine amidase; Gene_Symbol=PGLYRP2 Isoform 1 of N-acetylmuramoyl-L-alanine amidase	99	GCPDVQASLPDAK	Propionamide(C)@2; Label:13C(6)15N(2)(K)@13		-0.0851389	1378.58	690.297	1378.66	690.339	2	13	10.8793
9	4.259	4.259	4.259	IPI:IPI00394992.1; IPI:IPI00163207.1	Gene_Symbol=PGLYRP2 Isoform 2 of N-acetylmuramoyl-L-alanine amidase; Gene_Symbol=PGLYRP2 Isoform 1 of N-acetylmuramoyl-L-alanine amidase	99	GCPDVQASLPDAK	Propionamide(C)@2		0.450056	1371.1	686.557	1370.65	686.332	2	12	10.8483
9	4.259	4.259	4.259	IPI:IPI00394992.1; IPI:IPI00163207.1	Gene_Symbol=PGLYRP2 Isoform 2 of N-acetylmuramoyl-L-alanine amidase; Gene_Symbol=PGLYRP2 Isoform 1 of N-acetylmuramoyl-L-alanine amidase	6.698	GCPDVQASLPDAK	Propionamide(C)@2; Label:13C(6)15N(2)(K)@13		0.905828	1379.57	690.792	1378.66	690.339	2	10	11.8644
9	4.259	4.259	4.259	IPI:IPI00394992.1; IPI:IPI00163207.1	Gene_Symbol=PGLYRP2 Isoform 2 of N-acetylmuramoyl-L-alanine amidase; Gene_Symbol=PGLYRP2 Isoform 1 of N-acetylmuramoyl-L-alanine amidase	0	GCPDVQASLPDAK	Propionamide(C)@2; Label:13C(6)15N(2)(K)@13		0.896795	1379.56	690.788	1378.66	690.339	2	8	11.8883
9	5.06	5.06	5.06	IPI:IPI00292946.1	Gene_Symbol=SERPINA7 Thyroxine-binding globulin	99	AQWANPFDPSK	Label:13C(6)15N(2)(K)@11		-0.0758515	1267.53	634.773	1267.61	634.811	2	14	18.6155
9	5.06	5.06	5.06	IPI:IPI00292946.1	Gene_Symbol=SERPINA7 Thyroxine-binding globulin	99	NALALFVLPK	Label:13C(6)15N(2)(K)@10		-0.0635796	1092.62	547.315	1092.68	547.347	2	13	22.1124
9	5.06	5.06	5.06	IPI:IPI00292946.1	Gene_Symbol=SERPINA7 Thyroxine-binding globulin	99	AQWANPFDPSK	Label:13C(6)15N(2)(K)@11		-0.0638886	1267.54	634.779	1267.61	634.811	2	14	18.5915
9	5.06	5.06	5.06	IPI:IPI00292946.1	Gene_Symbol=SERPINA7 Thyroxine-binding globulin	99	NALALFVLPK	Label:13C(6)15N(2)(K)@10		-0.0212212	1092.66	547.336	1092.68	547.347	2	14	22.0884
9	11.25	11.25	11.25	IPI:IPI00027827.2	Gene_Symbol=SOD3 Extracellular superoxide dismutase [Cu-Zn]	99	AVVVHAGEDDLGR	Label:13C(6)15N(4)(R)@13		-0.084533	1346.6	674.306	1346.68	674.348	2	18	7.9717
9	11.25	11.25	11.25	IPI:IPI00027827.2	Gene_Symbol=SOD3 Extracellular superoxide dismutase [Cu-Zn]	99	GGNQASVENGNAGR	Label:13C(6)15N(4)(R)@14		-0.0776121	1339.53	670.774	1339.61	670.812	2	14	6.6212
9	11.25	11.25	11.25	IPI:IPI00027827.2	Gene_Symbol=SOD3 Extracellular superoxide dismutase [Cu-Zn]	99	AVVVHAGEDDLGR	Label:13C(6)15N(4)(R)@13		-0.0219547	1346.66	449.894	1346.68	449.901	3	14	7.9653
9	11.25	11.25	11.25	IPI:IPI00027827.2	Gene_Symbol=SOD3 Extracellular superoxide dismutase [Cu-Zn]	99	AVVVHAGEDDLGR	Label:13C(6)15N(4)(R)@13		-0.0772087	1346.6	674.31	1346.68	674.348	2	18	8.1357
9	11.25	11.25	11.25	IPI:IPI00027827.2	Gene_Symbol=SOD3 Extracellular superoxide dismutase [Cu-Zn]	99	AVVVHAGEDDLGR	Label:13C(6)15N(4)(R)@13		0.0995358	1346.78	449.934	1346.68	449.901	3	13	7.9415
9	11.25	11.25	11.25	IPI:IPI00027827.2	Gene_Symbol=SOD3 Extracellular superoxide dismutase [Cu-Zn]	10.89	GGNQASVENGNAGR	Label:13C(6)15N(4)(R)@14		0.935083	1340.55	671.28	1339.61	670.812	2	12	6.5403
9	3.17	3.17	3.17	IPI:IPI00006971.3	Gene_Symbol=CD248 Isoform 1 of Endosialin	99	LGFRPAEDDPHR	Label:13C(6)15N(4)(R)@4; Label:13C(6)15N(4)(R)@12		-0.0288837	1428.67	477.231	1428.7	477.241	3	14	7.6989
9	3.17	3.17	3.17	IPI:IPI00006971.3	Gene_Symbol=CD248 Isoform 1 of Endosialin	99	VDSLVGAGPASR	Label:13C(6)15N(4)(R)@12		-0.050146	1137.55	569.783	1137.6	569.808	2	13	9.1224
9	3.17	3.17	3.17	IPI:IPI00006971.3	Gene_Symbol=CD248 Isoform 1 of Endosialin	99	LGFRPAEDDPHR	Label:13C(6)15N(4)(R)@4; Label:13C(6)15N(4)(R)@12		-0.00132637	1428.7	477.241	1428.7	477.241	3	16	7.6751
9	3.17	3.17	3.17	IPI:IPI00006971.3	Gene_Symbol=CD248 Isoform 1 of Endosialin	10.89	LGFRPAEDDPHR	Label:13C(6)15N(4)(R)@4; Label:13C(6)15N(4)(R)@12		-0.0711983	1428.63	715.322	1428.7	715.358	2	8	7.7473
9	3.17	3.17	3.17	IPI:IPI00006971.3	Gene_Symbol=CD248 Isoform 1 of Endosialin	10.89	LGFRPAEDDPHR	Label:13C(6)15N(4)(R)@4; Label:13C(6)15N(4)(R)@12		-0.0720528	1428.63	715.322	1428.7	715.358	2	8	7.7714
9	3.17	3.17	3.17	IPI:IPI00006971.3	Gene_Symbol=CD248 Isoform 1 of Endosialin	99	VDSLVGAGPASR	Label:13C(6)15N(4)(R)@12		-0.0452632	1137.56	569.785	1137.6	569.808	2	13	9.1669
9	3.917	3.917	3.917	IPI:IPI00465248.5	Gene_Symbol=ENO1 Isoform alpha-enolase of Alpha-enolase	99	IGAEVYHNLK	Label:13C(6)15N(2)(K)@10		-0.0589129	1150.56	576.289	1150.62	576.319	2	15	8.4346
9	3.917	3.917	3.917	IPI:IPI00465248.5	Gene_Symbol=ENO1 Isoform alpha-enolase of Alpha-enolase	97.14	AVEHINK	Label:13C(6)15N(2)(K)@7		-0.0319024	817.422	409.718	817.454	409.734	2	10	6.5647
9	3.917	3.917	3.917	IPI:IPI00465248.5	Gene_Symbol=ENO1 Isoform alpha-enolase of Alpha-enolase	99	IGAEVYHNLK	Label:13C(6)15N(2)(K)@10		-0.00190608	1150.62	576.318	1150.62	576.319	2	14	8.4107
9	1.875	1.875	1.875	IPI:IPI00908654.1; IPI:IPI00784169.1; IPI:IPI00783145.1; IPI:IPI00477739.1; IPI:IPI00382926.2; IPI:IPI00292069.3; IPI:IPI00216550.2; IPI:IPI00152418.2	Gene_Symbol=- cDNA FLJ50227, moderately similar to Complement decay-accelerating factor; Gene_Symbol=CD55 Decay-accelerating factor splicing variant 1; Gene_Symbol=CD55 Decay-accelerating factor splicing variant 3; Gene_Symbol=CD55 CD55 molecule, decay accelerating factor for complement; Gene_Symbol=CD55 Decay-accelerating factor splicing variant 5; Gene_Symbol=CD55 Isoform 2 of Complement decay-…	99	QSVTYACNK	Gln->pyro-Glu@N-term; Propionamide(C)@7; Label:13C(6)15N(2)(K)@9		-0.0488967	1074.44	538.228	1074.49	538.252	2	11	8.7288
9	1.875	1.875	1.875	IPI:IPI00908654.1; IPI:IPI00784169.1; IPI:IPI00783145.1; IPI:IPI00477739.1; IPI:IPI00382926.2; IPI:IPI00292069.3; IPI:IPI00216550.2; IPI:IPI00152418.2	Gene_Symbol=- cDNA FLJ50227, moderately similar to Complement decay-accelerating factor; Gene_Symbol=CD55 Decay-accelerating factor splicing variant 1; Gene_Symbol=CD55 Decay-accelerating factor splicing variant 3; Gene_Symbol=CD55 CD55 molecule, decay accelerating factor for complement; Gene_Symbol=CD55 Decay-accelerating factor splicing variant 5; Gene_Symbol=CD55 Isoform 2 of Complement decay-…	99	QSVTYACNK	Gln->pyro-Glu@N-term; Propionamide(C)@7; Label:13C(6)15N(2)(K)@9		-0.0242385	1074.47	538.24	1074.49	538.252	2	10	7.0015
9	1.875	1.875	1.875	IPI:IPI00908654.1; IPI:IPI00784169.1; IPI:IPI00783145.1; IPI:IPI00477739.1; IPI:IPI00382926.2; IPI:IPI00292069.3; IPI:IPI00216550.2; IPI:IPI00152418.2	Gene_Symbol=- cDNA FLJ50227, moderately similar to Complement decay-accelerating factor; Gene_Symbol=CD55 Decay-accelerating factor splicing variant 1; Gene_Symbol=CD55 Decay-accelerating factor splicing variant 3; Gene_Symbol=CD55 CD55 molecule, decay accelerating factor for complement; Gene_Symbol=CD55 Decay-accelerating factor splicing variant 5; Gene_Symbol=CD55 Isoform 2 of Complement decay-…	75.73	QSVTYACNK	Gln->pyro-Glu@N-term; Propionamide(C)@7; Label:13C(6)15N(2)(K)@9		-1.00056	1073.49	537.752	1074.49	538.252	2	10	6.965
9	1.875	1.875	1.875	IPI:IPI00908654.1; IPI:IPI00784169.1; IPI:IPI00783145.1; IPI:IPI00477739.1; IPI:IPI00382926.2; IPI:IPI00292069.3; IPI:IPI00216550.2; IPI:IPI00152418.2	Gene_Symbol=- cDNA FLJ50227, moderately similar to Complement decay-accelerating factor; Gene_Symbol=CD55 Decay-accelerating factor splicing variant 1; Gene_Symbol=CD55 Decay-accelerating factor splicing variant 3; Gene_Symbol=CD55 CD55 molecule, decay accelerating factor for complement; Gene_Symbol=CD55 Decay-accelerating factor splicing variant 5; Gene_Symbol=CD55 Isoform 2 of Complement decay-…	75.73	QSVTYACNK	Gln->pyro-Glu@N-term; Propionamide(C)@7; Label:13C(6)15N(2)(K)@9		-0.075508	1074.41	538.214	1074.49	538.252	2	10	8.705
9	1.875	1.875	1.875	IPI:IPI00908654.1; IPI:IPI00784169.1; IPI:IPI00783145.1; IPI:IPI00477739.1; IPI:IPI00382926.2; IPI:IPI00292069.3; IPI:IPI00216550.2; IPI:IPI00152418.2	Gene_Symbol=- cDNA FLJ50227, moderately similar to Complement decay-accelerating factor; Gene_Symbol=CD55 Decay-accelerating factor splicing variant 1; Gene_Symbol=CD55 Decay-accelerating factor splicing variant 3; Gene_Symbol=CD55 CD55 molecule, decay accelerating factor for complement; Gene_Symbol=CD55 Decay-accelerating factor splicing variant 5; Gene_Symbol=CD55 Isoform 2 of Complement decay-…	4.98	QSVTYACNK	Propionamide(C)@7; Label:13C(6)15N(2)(K)@9		-0.0504214	1091.47	546.74	1091.52	546.765	2	9	6.9349
9	1.875	1.875	1.875	IPI:IPI00908654.1; IPI:IPI00784169.1; IPI:IPI00783145.1; IPI:IPI00477739.1; IPI:IPI00382926.2; IPI:IPI00292069.3; IPI:IPI00216550.2; IPI:IPI00152418.2	Gene_Symbol=- cDNA FLJ50227, moderately similar to Complement decay-accelerating factor; Gene_Symbol=CD55 Decay-accelerating factor splicing variant 1; Gene_Symbol=CD55 Decay-accelerating factor splicing variant 3; Gene_Symbol=CD55 CD55 molecule, decay accelerating factor for complement; Gene_Symbol=CD55 Decay-accelerating factor splicing variant 5; Gene_Symbol=CD55 Isoform 2 of Complement decay-…	0	QSVTYACNK	Propionamide(C)@7; Deamidated(N)@8; Label:13C(6)15N(2)(K)@9		0.957506	1093.46	547.736	1092.5	547.257	2	7	6.9587
9	1.875	1.875	1.875	IPI:IPI00908654.1; IPI:IPI00784169.1; IPI:IPI00783145.1; IPI:IPI00477739.1; IPI:IPI00382926.2; IPI:IPI00292069.3; IPI:IPI00216550.2; IPI:IPI00152418.2	Gene_Symbol=- cDNA FLJ50227, moderately similar to Complement decay-accelerating factor; Gene_Symbol=CD55 Decay-accelerating factor splicing variant 1; Gene_Symbol=CD55 Decay-accelerating factor splicing variant 3; Gene_Symbol=CD55 CD55 molecule, decay accelerating factor for complement; Gene_Symbol=CD55 Decay-accelerating factor splicing variant 5; Gene_Symbol=CD55 Isoform 2 of Complement decay-…	0	QSVTYACNK	Propionamide(C)@7; Deamidated(N)@8; Label:13C(6)15N(2)(K)@9		0.978136	1093.48	547.746	1092.5	547.257	2	8	6.9952
10	2.635	2.635	2.635	IPI:IPI00938079.1; IPI:IPI00246058.10	Gene_Symbol=PDCD6IP programmed cell death 6-interacting protein isoform 2; Gene_Symbol=PDCD6IP Programmed cell death 6-interacting protein	99	LALASLGYEK			0.451459	1064.04	533.029	1063.59	532.803	2	12	16.0698
10	2.635	2.635	2.635	IPI:IPI00938079.1; IPI:IPI00246058.10	Gene_Symbol=PDCD6IP programmed cell death 6-interacting protein isoform 2; Gene_Symbol=PDCD6IP Programmed cell death 6-interacting protein	99	LLDEEEATDNDLR			0.580051	1532.28	767.147	1531.7	766.857	2	15	11.9903
10	2.635	2.635	2.635	IPI:IPI00938079.1; IPI:IPI00246058.10	Gene_Symbol=PDCD6IP programmed cell death 6-interacting protein isoform 2; Gene_Symbol=PDCD6IP Programmed cell death 6-interacting protein	99	LALASLGYEK	Label:13C(6)15N(2)(K)@10		-0.0283161	1071.58	536.796	1071.61	536.81	2	12	15.9602
10	2.635	2.635	2.635	IPI:IPI00938079.1; IPI:IPI00246058.10	Gene_Symbol=PDCD6IP programmed cell death 6-interacting protein isoform 2; Gene_Symbol=PDCD6IP Programmed cell death 6-interacting protein	97.61	LALASLGYEK	Label:13C(6)15N(2)(K)@10		-0.0799518	1071.53	536.77	1071.61	536.81	2	12	15.9231
10	2.635	2.635	2.635	IPI:IPI00938079.1; IPI:IPI00246058.10	Gene_Symbol=PDCD6IP programmed cell death 6-interacting protein isoform 2; Gene_Symbol=PDCD6IP Programmed cell death 6-interacting protein	0	LALASLGYEK	Label:13C(6)15N(2)(K)@10		-0.0615192	1071.54	536.779	1071.61	536.81	2	7	11.0669
10	2.635	2.635	2.635	IPI:IPI00938079.1; IPI:IPI00246058.10	Gene_Symbol=PDCD6IP programmed cell death 6-interacting protein isoform 2; Gene_Symbol=PDCD6IP Programmed cell death 6-interacting protein	0	LALASLGYEK			0.39372	1063.99	533	1063.59	532.803	2	10	16.0455
10	2.635	2.635	2.635	IPI:IPI00938079.1; IPI:IPI00246058.10	Gene_Symbol=PDCD6IP programmed cell death 6-interacting protein isoform 2; Gene_Symbol=PDCD6IP Programmed cell death 6-interacting protein	99	LLDEEEATDNDLR	Label:13C(6)15N(4)(R)@13		-0.0826367	1541.63	771.82	1541.71	771.862	2	15	11.2097
10	2.635	2.635	2.635	IPI:IPI00938079.1; IPI:IPI00246058.10	Gene_Symbol=PDCD6IP programmed cell death 6-interacting protein isoform 2; Gene_Symbol=PDCD6IP Programmed cell death 6-interacting protein	99	LLDEEEATDNDLR	Label:13C(6)15N(4)(R)@13		-0.0904492	1541.62	771.816	1541.71	771.862	2	15	11.2376
10	2.635	2.635	2.635	IPI:IPI00938079.1; IPI:IPI00246058.10	Gene_Symbol=PDCD6IP programmed cell death 6-interacting protein isoform 2; Gene_Symbol=PDCD6IP Programmed cell death 6-interacting protein	99	LLDEEEATDNDLR			1.33542	1533.04	767.525	1531.7	766.857	2	14	12.0263
10	2.635	2.635	2.635	IPI:IPI00938079.1; IPI:IPI00246058.10	Gene_Symbol=PDCD6IP programmed cell death 6-interacting protein isoform 2; Gene_Symbol=PDCD6IP Programmed cell death 6-interacting protein	99	LLDEEEATDNDLR	Label:13C(6)15N(4)(R)@13		-0.0993604	1541.61	771.812	1541.71	771.862	2	14	12.2417
10	2.635	2.635	2.635	IPI:IPI00938079.1; IPI:IPI00246058.10	Gene_Symbol=PDCD6IP programmed cell death 6-interacting protein isoform 2; Gene_Symbol=PDCD6IP Programmed cell death 6-interacting protein	99	LLDEEEATDNDLR	Label:13C(6)15N(4)(R)@13		-0.0850782	1541.62	771.819	1541.71	771.862	2	14	12.2655
10	2.635	2.635	2.635	IPI:IPI00938079.1; IPI:IPI00246058.10	Gene_Symbol=PDCD6IP programmed cell death 6-interacting protein isoform 2; Gene_Symbol=PDCD6IP Programmed cell death 6-interacting protein	97.61	LLDEEEATDNDLR	Label:13C(6)15N(4)(R)@13		-0.0977868	1541.61	514.878	1541.71	514.91	3	13	11.738
10	2.635	2.635	2.635	IPI:IPI00938079.1; IPI:IPI00246058.10	Gene_Symbol=PDCD6IP programmed cell death 6-interacting protein isoform 2; Gene_Symbol=PDCD6IP Programmed cell death 6-interacting protein	97.61	LLDEEEATDNDLR	Label:13C(6)15N(4)(R)@13		-0.0503624	1541.66	514.893	1541.71	514.91	3	12	11.789
10	2.635	2.635	2.635	IPI:IPI00938079.1; IPI:IPI00246058.10	Gene_Symbol=PDCD6IP programmed cell death 6-interacting protein isoform 2; Gene_Symbol=PDCD6IP Programmed cell death 6-interacting protein	0	LLDEEEATDNDLR	Label:13C(6)15N(4)(R)@13		-0.0776452	1541.63	514.884	1541.71	514.91	3	12	9.4667
10	11.64	11.64	11.64	IPI:IPI00788938.1; IPI:IPI00219217.3	Gene_Symbol=LDHB L-lactate dehydrogenase; Gene_Symbol=LDHB L-lactate dehydrogenase B chain	99	SLADELALVDVLEDK	Label:13C(6)15N(2)(K)@15		-0.135494	1636.73	819.372	1636.87	819.44	2	14	22.1435
10	11.64	11.64	11.64	IPI:IPI00788938.1; IPI:IPI00219217.3	Gene_Symbol=LDHB L-lactate dehydrogenase; Gene_Symbol=LDHB L-lactate dehydrogenase B chain	99	VIGSGCNLDSAR	Propionamide(C)@6		0.339365	1261.95	631.981	1261.61	631.812	2	16	8.777
10	11.64	11.64	11.64	IPI:IPI00788938.1; IPI:IPI00219217.3	Gene_Symbol=LDHB L-lactate dehydrogenase; Gene_Symbol=LDHB L-lactate dehydrogenase B chain	99	SLADELALVDVLEDK	Label:13C(6)15N(2)(K)@15		-0.114376	1636.75	819.383	1636.87	819.44	2	13	22.1012
10	11.64	11.64	11.64	IPI:IPI00788938.1; IPI:IPI00219217.3	Gene_Symbol=LDHB L-lactate dehydrogenase; Gene_Symbol=LDHB L-lactate dehydrogenase B chain	99	VIGSGCNLDSAR	Propionamide(C)@6; Label:13C(6)15N(4)(R)@12		-0.0711256	1271.55	636.78	1271.62	636.816	2	14	8.2863
10	11.64	11.64	11.64	IPI:IPI00788938.1; IPI:IPI00219217.3	Gene_Symbol=LDHB L-lactate dehydrogenase; Gene_Symbol=LDHB L-lactate dehydrogenase B chain	99	VIGSGCNLDSAR	Propionamide(C)@6; Label:13C(6)15N(4)(R)@12		-0.0893141	1271.53	636.771	1271.62	636.816	2	15	8.3101
10	11.64	11.64	11.64	IPI:IPI00788938.1; IPI:IPI00219217.3	Gene_Symbol=LDHB L-lactate dehydrogenase; Gene_Symbol=LDHB L-lactate dehydrogenase B chain	99	VIGSGCNLDSAR	Propionamide(C)@6; Deamidated(N)@7		0.408694	1263	632.508	1262.59	632.304	2	14	9.1795
10	11.64	11.64	11.64	IPI:IPI00788938.1; IPI:IPI00219217.3	Gene_Symbol=LDHB L-lactate dehydrogenase; Gene_Symbol=LDHB L-lactate dehydrogenase B chain	99	VIGSGCNLDSAR	Propionamide(C)@6; Label:13C(6)15N(4)(R)@12		-1.12056	1270.5	636.255	1271.62	636.816	2	14	9.5034
10	11.64	11.64	11.64	IPI:IPI00788938.1; IPI:IPI00219217.3	Gene_Symbol=LDHB L-lactate dehydrogenase; Gene_Symbol=LDHB L-lactate dehydrogenase B chain	99	VIGSGCNLDSAR	Propionamide(C)@6; Deamidated(N)@7; Label:13C(6)15N(4)(R)@12		-0.0799215	1272.52	637.268	1272.6	637.308	2	14	9.5599
10	8.505	8.505	8.505	IPI:IPI00176427.1	Gene_Symbol=CADM4 Cell adhesion molecule 4	99	EQAVEGGEVELSCLVPR	Propionamide(C)@13; Label:13C(6)15N(4)(R)@17		-0.138501	1894.79	948.405	1894.93	948.474	2	14	20.7072
10	8.505	8.505	8.505	IPI:IPI00176427.1	Gene_Symbol=CADM4 Cell adhesion molecule 4	99	LHQYDGSIVVIQNPAR	Label:13C(6)15N(4)(R)@16		-0.102984	1818.86	910.437	1818.96	910.488	2	13	13.4634
10	8.505	8.505	8.505	IPI:IPI00176427.1	Gene_Symbol=CADM4 Cell adhesion molecule 4	99	EQAVEGGEVELSCLVPR	Propionamide(C)@13; Label:13C(6)15N(4)(R)@17		-0.0996346	1894.83	632.619	1894.93	632.652	3	16	20.5826
10	8.505	8.505	8.505	IPI:IPI00176427.1	Gene_Symbol=CADM4 Cell adhesion molecule 4	99	EQAVEGGEVELSCLVPR	Propionamide(C)@13; Label:13C(6)15N(4)(R)@17		-0.0789437	1894.85	632.625	1894.93	632.652	3	16	20.6229
10	8.505	8.505	8.505	IPI:IPI00176427.1	Gene_Symbol=CADM4 Cell adhesion molecule 4	99	EQAVEGGEVELSCLVPR	Propionamide(C)@13; Label:13C(6)15N(4)(R)@17		-0.133374	1894.8	948.407	1894.93	948.474	2	15	20.6757
10	8.505	8.505	8.505	IPI:IPI00176427.1	Gene_Symbol=CADM4 Cell adhesion molecule 4	0	EQAVEGGEVELSCLVPR	Propionamide(C)@13		1.24427	1886.17	629.73	1884.93	629.316	3	12	20.9717
10	8.505	8.505	8.505	IPI:IPI00176427.1	Gene_Symbol=CADM4 Cell adhesion molecule 4	0	EQAVEGGEVELSCLVPR	Propionamide(C)@13; Label:13C(6)15N(4)(R)@17		0.880346	1895.81	632.945	1894.93	632.652	3	11	21.7094
10	8.505	8.505	8.505	IPI:IPI00176427.1	Gene_Symbol=CADM4 Cell adhesion molecule 4	99	LHQYDGSIVVIQNPAR	Label:13C(6)15N(4)(R)@16		-0.0951849	1818.87	607.296	1818.96	607.328	3	14	13.2746
10	8.505	8.505	8.505	IPI:IPI00176427.1	Gene_Symbol=CADM4 Cell adhesion molecule 4	99	LHQYDGSIVVIQNPAR	Label:13C(6)15N(4)(R)@16		-0.0949275	1818.87	910.441	1818.96	910.488	2	13	13.4396
10	8.505	8.505	8.505	IPI:IPI00176427.1	Gene_Symbol=CADM4 Cell adhesion molecule 4	99	LHQYDGSIVVIQNPAR	Deamidated(N)@13; Label:13C(6)15N(4)(R)@16		-0.119728	1819.83	607.616	1819.95	607.656	3	15	14.2948
10	8.505	8.505	8.505	IPI:IPI00176427.1	Gene_Symbol=CADM4 Cell adhesion molecule 4	97.61	LHQYDGSIVVIQNPAR	Label:13C(6)15N(4)(R)@16		-0.0999457	1818.86	607.294	1818.96	607.328	3	13	10.3896
10	8.505	8.505	8.505	IPI:IPI00176427.1	Gene_Symbol=CADM4 Cell adhesion molecule 4	97.61	LHQYDGSIVVIQNPAR	Label:13C(6)15N(4)(R)@16		-0.0732123	1818.89	607.303	1818.96	607.328	3	12	13.2467
10	8.505	8.505	8.505	IPI:IPI00176427.1	Gene_Symbol=CADM4 Cell adhesion molecule 4	97.61	LHQYDGSIVVIQNPAR			0.225719	1809.18	905.597	1808.95	905.484	2	11	13.5664
10	8.505	8.505	8.505	IPI:IPI00176427.1	Gene_Symbol=CADM4 Cell adhesion molecule 4	0	LHQYDGSIVVIQNPAR	Deamidated(N)@13		1.36407	1811.3	604.774	1809.94	604.32	3	11	13.3674
10	8.505	8.505	8.505	IPI:IPI00176427.1	Gene_Symbol=CADM4 Cell adhesion molecule 4	0	LHQYDGSIVVIQNPAR			0.139294	1809.09	905.554	1808.95	905.484	2	10	13.6092
10	8.505	8.505	8.505	IPI:IPI00176427.1	Gene_Symbol=CADM4 Cell adhesion molecule 4	0	LHQYDGSIVVIQNPAR	Deamidated(N)@13; Label:13C(6)15N(4)(R)@16		-0.110206	1819.84	607.619	1819.95	607.656	3	13	14.2706
10	5.979	5.979	5.979	IPI:IPI00032220.3	Gene_Symbol=AGT Angiotensinogen	99	ALQDQLVLVAAK			0.253404	1268	635.009	1267.75	634.882	2	18	18.0859
10	5.979	5.979	5.979	IPI:IPI00032220.3	Gene_Symbol=AGT Angiotensinogen	99	VLSALQAVQGLLVAQGR	Label:13C(6)15N(4)(R)@17		-0.161451	1731.86	578.295	1732.02	578.348	3	14	22.1373
10	5.979	5.979	5.979	IPI:IPI00032220.3	Gene_Symbol=AGT Angiotensinogen	99	ALQDQLVLVAAK	Label:13C(6)15N(2)(K)@12		-0.0739049	1275.69	638.852	1275.76	638.889	2	17	17.9529
10	5.979	5.979	5.979	IPI:IPI00032220.3	Gene_Symbol=AGT Angiotensinogen	99	ALQDQLVLVAAK	Label:13C(6)15N(2)(K)@12		-0.0767125	1275.69	638.851	1275.76	638.889	2	17	17.9767
10	5.979	5.979	5.979	IPI:IPI00032220.3	Gene_Symbol=AGT Angiotensinogen	0	ALQDQLVLVAAK	Label:13C(6)15N(2)(K)@12		-0.0968979	1275.67	426.23	1275.76	426.262	3	13	18.1808
10	5.979	5.979	5.979	IPI:IPI00032220.3	Gene_Symbol=AGT Angiotensinogen	0	ALQDQLVLVAAK	Label:13C(6)15N(2)(K)@12		0.912301	1276.68	639.346	1275.76	638.889	2	10	19.035
10	5.979	5.979	5.979	IPI:IPI00032220.3	Gene_Symbol=AGT Angiotensinogen	0	ALQDQLVLVAAK	Label:13C(6)15N(2)(K)@12		0.906076	1276.67	639.342	1275.76	638.889	2	10	19.0588
10	5.979	5.979	5.979	IPI:IPI00032220.3	Gene_Symbol=AGT Angiotensinogen	0	ALQDQLVLVAAK	Label:13C(6)15N(2)(K)@12		0.994228	1276.76	426.593	1275.76	426.262	3	10	19.1292
10	5.979	5.979	5.979	IPI:IPI00032220.3	Gene_Symbol=AGT Angiotensinogen	0	ALQDQLVLVAAK			1.35765	1269.11	635.561	1267.75	634.882	2	10	19.1787
[truncated: 10,509 more rows]

## Sheet: Table S5
Table S5. SRM parameters of HBFP Peptides
[truncated: 17,896 more rows]

[truncated: 2 more sheets: Table S6 , Table S7]
